# Supplementary material for: SLC38A10 Regulate Glutamate Homeostasis and Modulate the AKT/TSC2/mTOR Pathway in Mouse Primary Cortex Cells
Source: Frontiers journal article supplement (doi:10.3389/fcell.2022.854397), 2022-04-05
Supplement: Data_Sheet_1.PDF [file Data_Sheet_1.PDF]

## Supplementary Data S1

### Transcriptomic

*SLC38A10* Regulate Glutamate Homeostasis and modulate the AKT/TSC2/mTOR Pathway in mouse cortex cells

AmpliSeq analysis was performed using a National Genomics Infrastructure (NGI), SciLifeLab platform, Uppsala.

Pre-processing data was performed as follows-

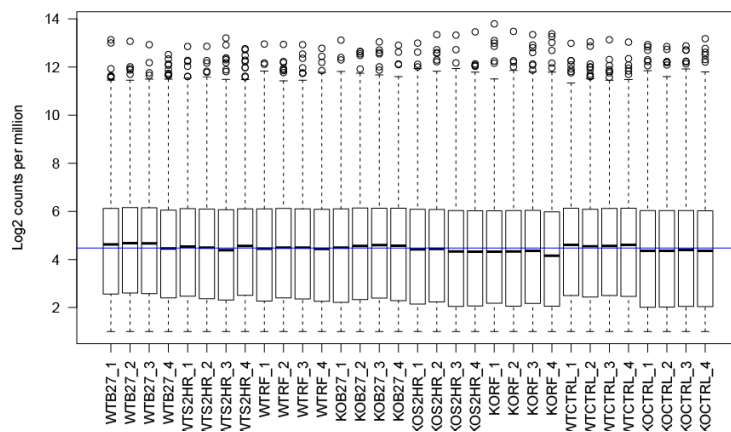

**Figures 1.** Boxplot showing data after normalisation for uneven sequencing depth and removal of slow expressed genes. Abbreviations; WTB27: Wild type starved of B27; WTS2HR: Wild type starved for 2HR; WTRF: Wild type refeed after 2h starvation; WTCTRL: Wild type cultured under normal (Basal) conditions; KOB27:KO starved of B27; KOS2HR:KO starved for 2HR; KORF:KO refeed after 2h starvation; KO CTRL:KO cultured under basal conditions

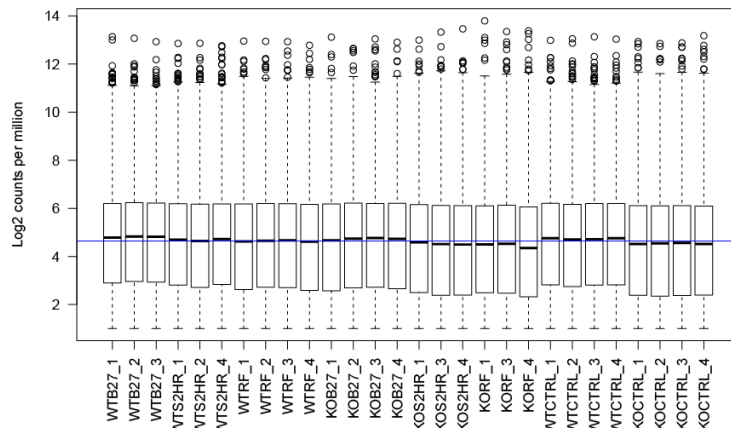

**Figure 2.** Box plot showing data after normalisation for uneven sequencing depth and removal of low expressed genes. Based on the clustering in Supplementary Figure 3, four samples: WTB27\_4, WTS2HR\_3, KOS2HR\_2, KORF\_2, were

removed. Abbreviations; WTB27: Wild type starved of B27; WTS2HR: Wild type starved for 2HR; WTRF: Wild type refed after 2h starvation; WTCTRL: Wild type cultured under normal conditions; KOB27:KO starved of B27; KOS2HR:KO starved for 2HR; KORF:KO refed after 2h starvation; KO CTRL:KO PCCs basal conditions

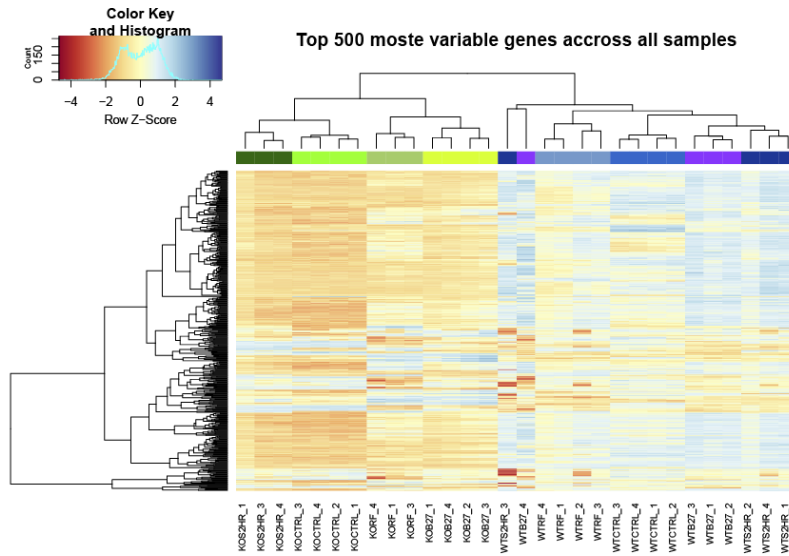

**Figure 3.** Heat map over the top 500 most differential expressed genes. Dendograms show clustering by sample, column wise and by gene row wise.

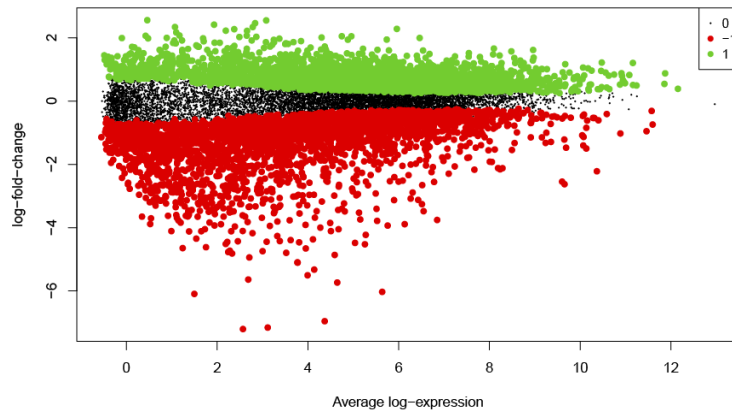

**Figure 4.** MDB plot showing differential expression of all genes between KO and WT basal groups.

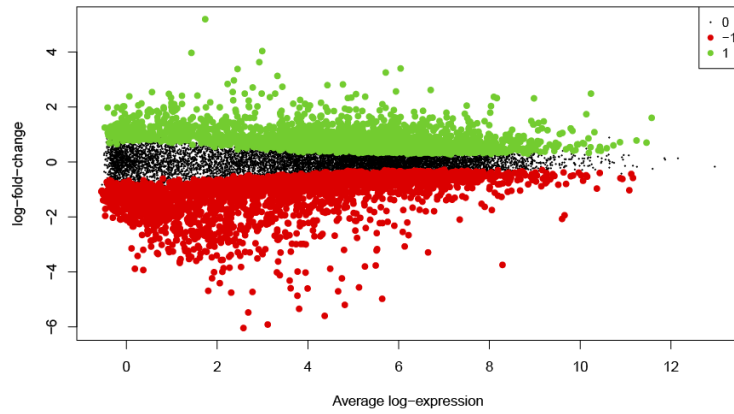

**Figure 5.** MDB plot showing differential expression of all genes between KO and WT B27 starvation groups.

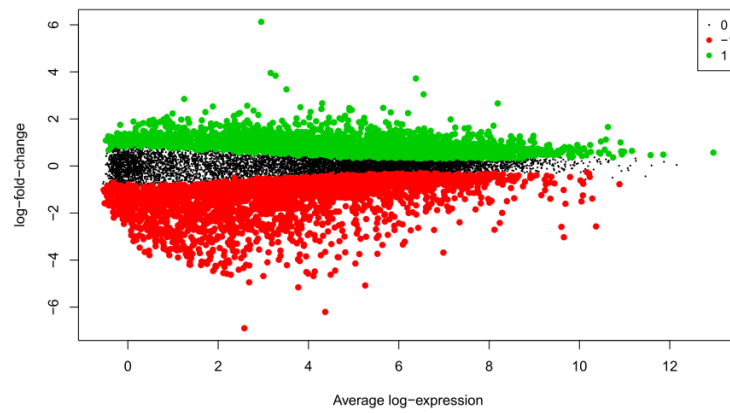

**Figure 6.** MDB plot showing differential expression of all genes between KO and WT starvation groups.

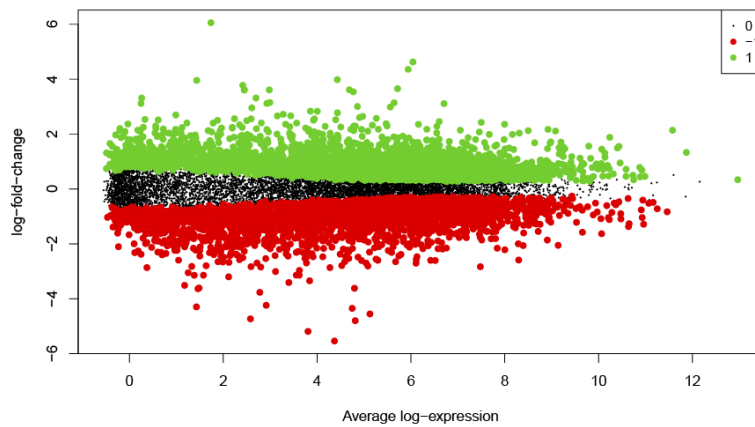

**Figure 7.** MDB plot showing differential expression of all genes between KO and WT refeed groups.
