# Supplementary material for: SLC38A10 Regulate Glutamate Homeostasis and Modulate the AKT/TSC2/mTOR Pathway in Mouse Primary Cortex Cells
Source: Front Cell Dev Biol. 2022 Apr 5;10:854397. doi: 10.3389/fcell.2022.854397 (PMC9017388; doi:10.3389/fcell.2022.854397)
Supplement: Supplementary file 2 [file Table2.XLSX]

## Sheet: Information
SE-1 Consists of total 10 worksheets
All data from Ampliseq analysis.
Control gene list-	Gene expression of KO Primary cortex cells against WT (Basal Condition)
SLCs _Basal (B)	List of SLCs change in KO Primary Cortex Cells at basal condition
B27 Starved(B27)	Gene expression of KO Primary Cortex Cells against WT (B27 starved Condition)
SLCs B27 starved	List of SLCs change in KO Primary Cortex Cells after overnight B27 starvation
Starved AA	Gene expression of KO Primary Cortex Cells against WT AT amino acid starved (Starved Condition)
SLCs Starved	List of SLCs change in KO Primary Cortex Cells after amino acid starvation for 2 hrs
Refed AA	Gene expression of KO Primary Cortex Cells against WT at Refed Condition (Refed Condition)
SLCs Refed	List of SLCs expression in KO Primary Cortex Cells after refeeding for 1 hr
Disease conditions	Ampliseq data were used for proceeses using IPA ,Cutoff set on b-h function 3 and generated list of disease and biofunction affected Primary cortx cells KO vs WT at basal level

## Sheet: Control Gene List 
Gene expression of KO PCC against WT at basal levels
	logFC	AveExpr	t	P.Value	adj.P.Val	B
Mkrn1	-7.15814	3.11429	-22.217	1.53e-20	2.14e-16	36.1819
Arsi	-6.0935	1.49716	-21.7168	2.97e-20	2.14e-16	35.4446
Glycam1	-7.20483	2.56877	-19.093	1.21e-18	4.47e-15	32.1554
Acta2	-6.02948	5.637	-19.0024	1.38e-18	4.47e-15	32.2362
Slc38a10	-6.95659	4.36971	-18.9243	1.56e-18	4.47e-15	32.0247
Vtn	-4.17352	2.77861	-17.7718	9.24e-18	2.21e-14	30.3684
Serpinf1	-3.29452	3.39043	-17.653	1.12e-17	2.29e-14	30.2848
Fmod	-5.50478	3.99262	-17.415	1.63e-17	2.93e-14	29.722
Lgals1	-3.78535	5.52573	-16.9888	3.27e-17	5.22e-14	29.2776
Igf2	-3.52501	5.12611	-16.8509	4.11e-17	5.9e-14	29.0641
H19	-4.42998	2.45592	-16.5749	6.51e-17	8.17e-14	28.5089
Cdh5	-3.65058	0.343421	-16.5466	6.83e-17	8.17e-14	28.1971
Spp1	-5.73444	4.64683	-16.1458	1.35e-16	1.49e-13	27.8519
Ogn	-5.09606	3.76879	-15.846	2.26e-16	2.32e-13	27.1937
Apod	-3.40127	4.74852	-15.7299	2.77e-16	2.65e-13	27.169
Lox	-4.39258	3.61957	-15.6871	2.99e-16	2.68e-13	27.0436
Col1a2	-3.33241	2.7191	-15.4736	4.36e-16	3.68e-13	26.718
Clec7a	-4.94061	2.70925	-15.284	6.1e-16	4.87e-13	26.2525
Sepp1	-2.16618	7.66917	-15.1624	7.6e-16	5.74e-13	26.1145
Hpgds	-4.45061	2.22377	-15.1249	8.13e-16	5.84e-13	25.9447
Gpnmb	-5.32547	4.13898	-15.0785	8.84e-16	6.04e-13	25.9827
Ccl9	-4.11166	1.65043	-14.9852	1.05e-15	6.71e-13	25.6912
Lpar1	-2.7631	4.97463	-14.9707	1.07e-15	6.71e-13	25.823
Fcgr3	-2.90212	2.96301	-14.9458	1.12e-15	6.73e-13	25.7517
Dab2	-3.73948	5.15403	-14.8594	1.32e-15	7.56e-13	25.6239
Fcer1g	-5.10509	3.77268	-14.632	2e-15	1.11e-12	25.1625
Akr1c14	-4.42284	3.38116	-14.6107	2.08e-15	1.11e-12	24.999
Col1a1	-3.48456	4.81304	-14.4814	2.65e-15	1.36e-12	24.8865
Cnn2	-2.70058	4.67922	-14.418	2.98e-15	1.48e-12	24.8148
Tlr7	-4.11862	1.38151	-14.3598	3.32e-15	1.59e-12	24.5477
Emp1	-3.85011	4.49115	-14.2383	4.18e-15	1.92e-12	24.469
Anxa3	-3.32611	2.84464	-14.2126	4.38e-15	1.92e-12	24.384
C3ar1	-4.81614	2.32918	-14.2089	4.42e-15	1.92e-12	24.3133
Ptpn14	-3.55095	3.81545	-14.1685	4.77e-15	1.93e-12	24.3071
Mrc1	-3.84009	1.19559	-14.1619	4.83e-15	1.93e-12	24.2321
Lcp1	-4.46258	3.80758	-14.1611	4.83e-15	1.93e-12	24.3101
Pi15	-3.82069	2.6712	-14.144	4.99e-15	1.94e-12	24.2283
Gpc3	-1.82761	4.56684	-14.1096	5.33e-15	1.96e-12	24.223
Wisp2	-5.63989	2.68548	-14.1059	5.37e-15	1.96e-12	24.1309
Cpz	-3.88394	0.524628	-14.0976	5.45e-15	1.96e-12	24.0618
Anpep	-3.70432	0.542783	-14.0678	5.77e-15	2.02e-12	23.9978
Lyz2	-4.52482	5.25605	-14.0237	6.28e-15	2.13e-12	24.0762
Ttr	2.4189	1.93182	14.0059	6.5e-15	2.13e-12	23.9952
Wls	-2.08473	6.75355	-14.0024	6.54e-15	2.13e-12	23.9724
Col4a1	-2.33863	6.21741	-13.9026	7.92e-15	2.48e-12	23.7899
Anxa1	-4.3464	1.53968	-13.9007	7.95e-15	2.48e-12	23.7621
Thbs1	-3.88896	6.13237	-13.8827	8.23e-15	2.51e-12	23.7955
Atp6v0d2	-4.10876	0.990486	-13.8684	8.46e-15	2.53e-12	23.6502
Gstm2	-3.68705	2.98567	-13.8103	9.46e-15	2.77e-12	23.6103
Plau	-4.51386	2.1887	-13.7718	1.02e-14	2.93e-12	23.5311
Fstl1	-1.92034	8.05393	-13.694	1.19e-14	3.34e-12	23.3325
Id3	-3.25591	6.51277	-13.6582	1.27e-14	3.47e-12	23.2847
Cald1	-2.88866	6.30711	-13.6547	1.28e-14	3.47e-12	23.3314
Pdlim2	-4.26423	3.32525	-13.5828	1.47e-14	3.92e-12	23.2015
Vegfa	2.28545	5.95969	13.5473	1.58e-14	4.12e-12	23.0797
Col3a1	-3.28691	3.80651	-13.4991	1.74e-14	4.41e-12	23.0621
Cryab	-3.40439	5.51188	-13.4949	1.75e-14	4.41e-12	23.0515
Vim	-2.54403	9.60125	-13.4642	1.86e-14	4.6e-12	22.8685
Heg1	-4.22745	5.27444	-13.4392	1.95e-14	4.75e-12	22.9522
P3h2	-3.91114	3.94742	-13.3326	2.41e-14	5.77e-12	22.7275
Csf1	-3.08032	6.26394	-13.2132	3.06e-14	7.19e-12	22.4644
Mxra8	-3.29434	3.98421	-13.1341	3.58e-14	8.29e-12	22.3497
1500015O10Rik	-3.44064	4.66651	-13.0273	4.44e-14	1.01e-11	22.1406
Cd180	-4.61745	1.75405	-12.8961	5.78e-14	1.29e-11	21.8203
Stab1	-4.79515	3.52231	-12.8908	5.85e-14	1.29e-11	21.8635
Tgfb3	-2.13937	4.35319	-12.8594	6.23e-14	1.36e-11	21.7765
Dio3	-2.39153	1.53885	-12.8162	6.8e-14	1.46e-11	21.688
Myl9	-3.47833	4.19185	-12.7739	7.42e-14	1.57e-11	21.6336
A730049H05Rik	-4.11374	2.31026	-12.7399	7.95e-14	1.66e-11	21.4878
Pcolce	-3.5182	2.27302	-12.6733	9.11e-14	1.87e-11	21.4034
Ctsd	-2.21623	10.3675	-12.6641	9.29e-14	1.88e-11	21.2287
Tbx18	-2.81955	1.46055	-12.6426	9.71e-14	1.94e-11	21.3371
Afap1l2	-1.9747	4.97737	-12.5781	1.11e-13	2.17e-11	21.1754
Crb2	-3.8057	3.32741	-12.574	1.12e-13	2.17e-11	21.2185
Pltp	-2.4006	5.90501	-12.5678	1.13e-13	2.17e-11	21.1626
Fcrls	-4.72764	2.27933	-12.537	1.21e-13	2.28e-11	21.1111
Npl	-2.04354	4.54237	-12.5274	1.23e-13	2.3e-11	21.1113
Palld	-3.12284	6.42908	-12.5085	1.28e-13	2.36e-11	20.9988
Cd36	-2.86333	1.66807	-12.4202	1.54e-13	2.8e-11	20.8785
Col11a1	-2.65999	5.32465	-12.4027	1.6e-13	2.86e-11	20.8188
Aldh1a2	-2.99885	0.860866	-12.397	1.61e-13	2.86e-11	20.8283
Mmp2	-3.07614	2.74027	-12.3915	1.63e-13	2.86e-11	20.85
P2ry6	-3.23033	0.627303	-12.3547	1.76e-13	3.05e-11	20.699
Pdgfrl	-3.17366	4.30754	-12.3491	1.78e-13	3.05e-11	20.7664
Mbp	-2.65453	6.51918	-12.2922	2.01e-13	3.4e-11	20.5409
Pdpn	-2.2432	6.72406	-12.2699	2.11e-13	3.52e-11	20.4881
Emp3	-3.39337	2.26456	-12.2272	2.3e-13	3.8e-11	20.5024
Nes	-2.29211	7.10244	-12.2012	2.43e-13	3.97e-11	20.2952
Cyr61	-3.75684	6.84817	-12.1908	2.49e-13	4.01e-11	20.4013
Ucp2	-2.98674	4.58016	-12.1852	2.52e-13	4.02e-11	20.399
Tyrobp	-4.65685	3.95334	-12.1669	2.62e-13	4.13e-11	20.3886
Itgam	-4.04897	1.7295	-12.1502	2.71e-13	4.23e-11	20.3117
Actn4	-2.54377	5.99797	-12.1383	2.78e-13	4.29e-11	20.2486
Jam2	-2.06366	7.23556	-12.1199	2.89e-13	4.42e-11	20.1312
Aebp1	-3.54174	3.25085	-12.1056	2.98e-13	4.48e-11	20.2605
Cd53	-3.65326	1.56995	-12.1034	2.99e-13	4.48e-11	20.2038
Nid1	-3.23439	4.79615	-12.0487	3.36e-13	4.98e-11	20.0834
Plscr2	-3.89113	2.08372	-12.012	3.63e-13	5.33e-11	20.0142
Cd248	-2.51883	2.38462	-11.9667	4e-13	5.81e-11	19.9688
Runx1	-3.77134	1.14797	-11.8938	4.68e-13	6.72e-11	19.7668
Ctsh	-3.02987	2.24602	-11.8856	4.76e-13	6.77e-11	19.7719
Lbp	-3.50211	2.30221	-11.8656	4.97e-13	7e-11	19.7267
Cyp1b1	-3.34112	3.36603	-11.8176	5.51e-13	7.68e-11	19.642
Tgfb1	-3.47586	2.30717	-11.8074	5.63e-13	7.73e-11	19.623
Ptgds	-2.85417	4.98971	-11.8032	5.68e-13	7.73e-11	19.5771
Lmx1a	-2.7781	1.15826	-11.8017	5.7e-13	7.73e-11	19.5921
Ccdc80	-2.3345	5.38256	-11.7868	5.89e-13	7.9e-11	19.5133
Bmp6	-3.93376	5.75696	-11.7813	5.96e-13	7.92e-11	19.5551
Lama4	-2.63367	2.91464	-11.7355	6.58e-13	8.59e-11	19.4774
Lgals3	-4.76872	2.24258	-11.7352	6.58e-13	8.59e-11	19.4658
Laptm5	-4.86223	4.5906	-11.714	6.89e-13	8.92e-11	19.4248
Fabp4	-2.62919	0.033253	-11.7015	7.08e-13	9.08e-11	19.34
Pik3cg	-2.87546	0.529435	-11.6609	7.73e-13	9.83e-11	19.2587
Unc93b1	-3.60914	2.56102	-11.6506	7.91e-13	9.9e-11	19.2969
Kdr	-3.96306	2.39062	-11.6495	7.93e-13	9.9e-11	19.2912
Rassf4	-3.76603	3.59811	-11.6039	8.75e-13	1.08e-10	19.1966
Ehd2	-3.01843	3.6773	-11.6036	8.76e-13	1.08e-10	19.1847
Anxa5	-2.55332	6.78046	-11.5971	8.88e-13	1.08e-10	19.0482
Col4a2	-1.90885	4.52615	-11.5901	9.02e-13	1.08e-10	19.0621
Cyba	-4.10491	2.5634	-11.5876	9.07e-13	1.08e-10	19.1589
Cnn1	-3.23951	2.07061	-11.5873	9.07e-13	1.08e-10	19.1543
Col22a1	-3.25671	2.52682	-11.5763	9.3e-13	1.09e-10	19.1347
Ccl3	-3.65001	2.14157	-11.5603	9.63e-13	1.12e-10	19.0975
Dcn	-2.17047	5.08307	-11.5448	9.96e-13	1.15e-10	18.9441
Traf1	-3.02641	1.85607	-11.5084	1.08e-12	1.24e-10	18.9485
Cped1	-3.22192	1.5774	-11.4995	1.1e-12	1.25e-10	18.9539
Fbln5	-2.51651	3.78759	-11.4795	1.15e-12	1.3e-10	18.9206
Col8a1	-3.27008	2.05865	-11.4762	1.16e-12	1.3e-10	18.9154
St5	-1.90208	5.23991	-11.4642	1.19e-12	1.32e-10	18.8161
Hexb	-3.12824	5.89836	-11.4197	1.31e-12	1.45e-10	18.6627
Cybb	-3.62341	1.30882	-11.3926	1.39e-12	1.52e-10	18.7123
Ptpn6	-3.22066	1.20445	-11.3829	1.42e-12	1.55e-10	18.6806
Wfdc17	-3.45608	1.36793	-11.3745	1.45e-12	1.56e-10	18.6751
Myof	-3.0714	2.4257	-11.3727	1.45e-12	1.56e-10	18.698
Vamp8	-2.87683	3.21634	-11.3468	1.54e-12	1.64e-10	18.6385
Id1	-1.95471	5.82504	-11.3419	1.56e-12	1.64e-10	18.4638
Ms4a4a	-4.64595	1.24013	-11.3399	1.56e-12	1.64e-10	18.6201
Daam2	-2.53042	5.80653	-11.3219	1.63e-12	1.69e-10	18.4727
Ppp1r3c	1.32314	5.79846	11.2818	1.78e-12	1.83e-10	18.2949
Cdca3	-1.90213	3.96076	-11.2795	1.79e-12	1.83e-10	18.4281
Tst	-1.5699	5.9089	-11.2723	1.81e-12	1.85e-10	18.2977
Ms4a6c	-3.3232	1.2828	-11.2563	1.88e-12	1.9e-10	18.4151
Ddr2	-2.82455	2.88196	-11.2369	1.96e-12	1.97e-10	18.4008
Dlk1	-2.9195	5.4935	-11.2317	1.99e-12	1.98e-10	18.3361
Lcp2	-3.49891	1.36429	-11.2286	2e-12	1.98e-10	18.3659
Pik3ap1	-3.83602	1.83197	-11.2021	2.12e-12	2.07e-10	18.3185
Srgn	-3.0366	0.867206	-11.2018	2.12e-12	2.07e-10	18.301
Angpt2	-3.07139	0.675802	-11.1896	2.18e-12	2.11e-10	18.26
Slc24a5	-2.76962	0.0733547	-11.1887	2.18e-12	2.11e-10	18.2516
Plekha2	-2.46353	3.59402	-11.1794	2.23e-12	2.11e-10	18.257
C1qb	-4.36833	4.1108	-11.1785	2.24e-12	2.11e-10	18.2605
Klhdc7a	-3.07165	1.87266	-11.1785	2.24e-12	2.11e-10	18.2551
Gm17455	-3.48709	3.26791	-11.152	2.37e-12	2.23e-10	18.2131
Itgb2	-3.9308	1.94155	-11.1489	2.39e-12	2.23e-10	18.201
Tgm2	-3.10027	1.64471	-11.14	2.44e-12	2.26e-10	18.1843
Sash3	-2.8213	0.419839	-11.1368	2.45e-12	2.26e-10	18.1512
Cd28	-3.30144	0.642946	-11.085	2.75e-12	2.51e-10	18.0449
Tgfbr2	-3.4837	2.36299	-11.0819	2.77e-12	2.51e-10	18.0604
Plat	-1.42822	7.36654	-11.0803	2.78e-12	2.51e-10	17.8298
Ablim3	1.31759	6.41637	11.0728	2.83e-12	2.54e-10	17.8393
Islr	-2.572	3.55541	-11.0586	2.92e-12	2.61e-10	17.9762
Mgp	-3.27351	1.77767	-11.0416	3.04e-12	2.69e-10	17.9721
Egr1	-2.11617	8.19007	-11.0227	3.17e-12	2.79e-10	17.7109
Vav1	-3.57877	1.37757	-11.0207	3.18e-12	2.79e-10	17.9093
Mamdc2	-3.08255	2.48344	-10.9933	3.39e-12	2.95e-10	17.8646
Plin2	-2.15748	5.55107	-10.9714	3.56e-12	3.05e-10	17.6892
Acss2	1.9477	5.73714	10.9703	3.56e-12	3.05e-10	17.6158
Casq1	-3.25731	2.50746	-10.9701	3.57e-12	3.05e-10	17.8128
Ctla2b	-3.68693	1.11219	-10.9518	3.72e-12	3.16e-10	17.7618
Cd68	-4.10849	4.50649	-10.9457	3.77e-12	3.18e-10	17.7182
B4galt1	-2.44905	3.05178	-10.9439	3.78e-12	3.18e-10	17.7452
Fam180a	-3.19503	0.513846	-10.9298	3.91e-12	3.26e-10	17.704
Rnh1	-1.47628	5.17842	-10.9107	4.08e-12	3.39e-10	17.552
Myo1e	-2.93927	5.10251	-10.8181	5.03e-12	4.14e-10	17.4161
Shc1	-2.3872	4.42517	-10.8175	5.04e-12	4.14e-10	17.3916
Itga6	-1.74081	7.08029	-10.7968	5.28e-12	4.31e-10	17.2027
Ctss	-4.74302	3.00114	-10.7764	5.53e-12	4.49e-10	17.3815
Vgll3	-2.73241	2.88609	-10.765	5.68e-12	4.58e-10	17.3466
Gpr34	-3.05746	0.428265	-10.7587	5.76e-12	4.62e-10	17.3183
Tcn2	-1.87855	5.73044	-10.7529	5.84e-12	4.66e-10	17.2014
Cx3cr1	-3.38567	2.13654	-10.749	5.89e-12	4.67e-10	17.32
Lepr	-3.13474	1.32839	-10.7455	5.94e-12	4.69e-10	17.3123
Prom1	-2.57922	4.03346	-10.732	6.12e-12	4.81e-10	17.259
Capg	-3.45105	1.90399	-10.7184	6.32e-12	4.93e-10	17.2422
P4ha3	-2.5422	5.27789	-10.6751	6.98e-12	5.42e-10	17.0826
Smpdl3a	-1.82278	5.90928	-10.6592	7.23e-12	5.59e-10	16.9908
Pld4	-3.46791	1.61914	-10.617	7.97e-12	6.12e-10	17.0136
Tm4sf1	-3.64983	2.6165	-10.6054	8.19e-12	6.25e-10	16.9931
Olfml3	-3.41488	1.94683	-10.5968	8.35e-12	6.35e-10	16.9768
Cfh	-3.35445	1.99023	-10.5845	8.59e-12	6.49e-10	16.9491
Slfn2	-3.20252	1.08537	-10.5597	9.1e-12	6.84e-10	16.8773
Trem2	-4.44451	3.0906	-10.536	9.61e-12	7.19e-10	16.8323
Hacd4	-2.97991	3.88273	-10.5146	1.01e-11	7.51e-10	16.778
Mmp12	-3.1479	0.747246	-10.5086	1.02e-11	7.58e-10	16.7619
Stard8	-2.95972	4.13267	-10.5056	1.03e-11	7.59e-10	16.7375
Pmp22	-1.70215	6.62586	-10.4956	1.06e-11	7.73e-10	16.53
Slc16a4	-3.45792	1.92084	-10.4894	1.07e-11	7.8e-10	16.7286
Anxa2	-2.97641	5.06639	-10.4869	1.08e-11	7.81e-10	16.6067
AI607873	-3.01753	0.869309	-10.4795	1.1e-11	7.9e-10	16.6997
Ms4a7	-3.62472	0.917889	-10.4778	1.1e-11	7.9e-10	16.6993
Myl12a	-1.70265	5.97938	-10.4714	1.12e-11	7.97e-10	16.5018
Lgals9	-2.98628	1.63412	-10.4638	1.14e-11	8.07e-10	16.6707
Itih5	-2.56183	5.07837	-10.4492	1.17e-11	8.29e-10	16.5192
Thbs2	-2.54659	2.64589	-10.448	1.18e-11	8.29e-10	16.616
Snx18	-1.44353	6.6833	-10.4443	1.19e-11	8.32e-10	16.3878
Tmem47	-1.91359	8.00748	-10.4396	1.2e-11	8.38e-10	16.3412
Slc27a3	1.59618	3.78198	10.4334	1.22e-11	8.45e-10	16.4958
Pawr	-3.39922	3.28844	-10.43	1.23e-11	8.48e-10	16.5903
Hk3	-3.59854	1.09915	-10.4197	1.26e-11	8.64e-10	16.5685
AW551984	2.01317	4.30131	10.4069	1.3e-11	8.86e-10	16.4699
Shroom3	-4.04903	4.67523	-10.405	1.3e-11	8.86e-10	16.4922
Grn	-1.46985	7.69801	-10.3941	1.34e-11	9.05e-10	16.2295
Osr1	-3.09657	1.20005	-10.3909	1.35e-11	9.07e-10	16.5079
Nr4a1	-1.97714	6.37817	-10.3807	1.38e-11	9.25e-10	16.3233
Cd84	-2.58177	0.0388658	-10.3505	1.48e-11	9.87e-10	16.3979
Inpp5d	-3.64513	1.35083	-10.3328	1.54e-11	1.02e-09	16.3717
Cd5l	-3.61265	1.36931	-10.3243	1.57e-11	1.04e-09	16.3553
Foxj1	-2.513	6.08956	-10.3099	1.63e-11	1.07e-09	16.1689
Spi1	-3.49709	1.81402	-10.3065	1.64e-11	1.07e-09	16.3147
Bgn	-2.44814	5.00792	-10.2993	1.67e-11	1.09e-09	16.1714
Rab32	-3.23257	2.32828	-10.2424	1.9e-11	1.24e-09	16.1648
Adam8	-2.91198	2.90676	-10.1867	2.17e-11	1.4e-09	16.0337
Itm2a	-1.69801	4.81554	-10.1825	2.19e-11	1.41e-09	15.8624
Plekhg3	-2.72591	1.90671	-10.1529	2.35e-11	1.5e-09	15.9604
Grin2d	1.68399	3.03318	10.1519	2.36e-11	1.5e-09	15.9311
Foxd1	-2.90978	0.544833	-10.1505	2.36e-11	1.5e-09	15.9463
Ajuba	-2.7725	3.1838	-10.1398	2.42e-11	1.53e-09	15.9131
Gngt2	-3.03605	0.648124	-10.1362	2.45e-11	1.54e-09	15.9135
Sctr	-2.66766	0.922662	-10.1251	2.51e-11	1.57e-09	15.8856
Gsn	-1.96939	4.77979	-10.1199	2.54e-11	1.59e-09	15.7619
Gcnt1	-3.33393	1.76374	-10.1173	2.56e-11	1.59e-09	15.8768
Ehd4	-2.17893	3.43447	-10.1119	2.59e-11	1.6e-09	15.8103
Cd300a	-2.88392	1.11533	-10.0811	2.79e-11	1.72e-09	15.7917
Anxa4	-2.96193	4.02987	-10.0766	2.81e-11	1.73e-09	15.7579
Dkk2	-3.23399	0.873168	-10.067	2.88e-11	1.76e-09	15.7609
Hmox1	-1.89046	6.98741	-10.0443	3.04e-11	1.85e-09	15.4845
Il1r1	-2.64106	1.63758	-10.013	3.27e-11	1.98e-09	15.6353
Mfap4	-2.73093	1.37622	-10.0027	3.35e-11	2.02e-09	15.6104
Plp1	-2.03303	6.60192	-9.98071	3.54e-11	2.12e-09	15.2846
Fos	-3.47845	6.54892	-9.95453	3.76e-11	2.25e-09	15.4285
Tfpi	-2.39302	2.28636	-9.9501	3.8e-11	2.27e-09	15.4739
Steap3	-3.22911	3.00549	-9.93346	3.96e-11	2.35e-09	15.4284
Sod3	-3.01841	2.12097	-9.9281	4.01e-11	2.37e-09	15.4342
Rcsd1	-2.63196	1.45238	-9.87647	4.54e-11	2.67e-09	15.3153
Fam198b	-2.43399	2.50485	-9.84625	4.88e-11	2.86e-09	15.2215
Mfsd2a	-1.70318	5.6434	-9.83169	5.05e-11	2.95e-09	14.9669
Kcnj10	-1.79168	7.51435	-9.82725	5.1e-11	2.97e-09	14.8829
Sorbs3	-1.97614	5.60379	-9.82106	5.18e-11	3e-09	14.9923
Spon2	-2.66179	0.957661	-9.79498	5.52e-11	3.17e-09	15.1226
Ctsz	-2.64451	4.68566	-9.79486	5.52e-11	3.17e-09	15.0175
Milr1	-2.84802	0.606608	-9.78601	5.64e-11	3.22e-09	15.0996
Stom	-1.87091	6.60053	-9.77971	5.72e-11	3.25e-09	14.8167
Slc6a13	-2.66811	1.48383	-9.77909	5.73e-11	3.25e-09	15.0767
Lrrc17	-2.67693	0.385211	-9.76296	5.96e-11	3.37e-09	15.0482
Ptrf	-3.99794	4.27354	-9.75683	6.05e-11	3.41e-09	14.9761
Tnfrsf10b	-2.54897	3.43467	-9.73936	6.31e-11	3.54e-09	14.9666
Cyth4	-3.43954	1.43756	-9.73474	6.38e-11	3.56e-09	14.98
Epha10	1.93922	3.24817	9.72957	6.46e-11	3.59e-09	14.8635
Sdc2	-1.20691	6.90997	-9.72756	6.49e-11	3.6e-09	14.6804
Foxc1	-2.89745	1.90882	-9.71966	6.61e-11	3.65e-09	14.9401
Ptgis	-2.58551	0.322417	-9.70454	6.86e-11	3.77e-09	14.908
Slc13a4	-2.42369	-0.0970013	-9.70234	6.9e-11	3.77e-09	14.9024
B2m	-1.59314	7.34508	-9.702	6.9e-11	3.77e-09	14.6199
Plek	-2.40223	3.74337	-9.67449	7.38e-11	4.01e-09	14.7308
Sparc	-2.62528	9.6554	-9.66942	7.47e-11	4.05e-09	14.4649
Npy	1.39681	7.79024	9.65111	7.81e-11	4.22e-09	14.4599
Scd1	1.37698	8.97399	9.6254	8.31e-11	4.47e-09	14.3528
Ccdc40	-2.08942	3.84616	-9.61879	8.44e-11	4.5e-09	14.6405
Cgnl1	-2.81598	2.66522	-9.61807	8.46e-11	4.5e-09	14.6808
Cybrd1	-1.77887	4.30726	-9.6177	8.47e-11	4.5e-09	14.6011
Jam3	-1.31797	6.09593	-9.61205	8.58e-11	4.55e-09	14.4185
Bace2	-2.00161	5.46009	-9.60742	8.68e-11	4.58e-09	14.4749
Slc12a7	-2.12144	4.39973	-9.59154	9.02e-11	4.75e-09	14.5265
Nckap1l	-2.6901	2.12708	-9.58524	9.16e-11	4.8e-09	14.611
Vat1l	1.36289	5.68663	9.57058	9.49e-11	4.96e-09	14.299
Lect1	-2.54649	2.63558	-9.56776	9.56e-11	4.97e-09	14.568
Sema3c	-1.37386	5.16544	-9.56045	9.73e-11	5.05e-09	14.3068
Pard3b	-2.40078	3.90287	-9.55192	9.94e-11	5.13e-09	14.4851
Ccng1	-1.17089	7.40358	-9.54728	1e-10	5.17e-09	14.2156
Il17rc	-2.44567	2.23799	-9.54475	1.01e-10	5.19e-09	14.5256
Mal	-2.8632	1.20238	-9.52851	1.05e-10	5.38e-09	14.4911
Abcc3	-3.35025	1.08584	-9.51451	1.09e-10	5.54e-09	14.4578
Acly	1.19291	7.65211	9.47927	1.19e-10	6.02e-09	14.0029
Arhgap30	-3.11548	0.601544	-9.46454	1.23e-10	6.22e-09	14.3381
Arl11	-3.13514	0.789835	-9.45394	1.26e-10	6.36e-09	14.3127
Gbp3	-3.34338	2.69528	-9.42123	1.37e-10	6.87e-09	14.2277
Plaur	-2.95827	0.280137	-9.41926	1.37e-10	6.88e-09	14.2291
Mt3	-1.40102	10.068	-9.40468	1.42e-10	7.11e-09	13.8041
Dcxr	-1.86745	4.53042	-9.39692	1.45e-10	7.22e-09	14.0599
Col18a1	-2.27594	3.31631	-9.39427	1.46e-10	7.24e-09	14.102
Tlr4	-2.73308	0.577728	-9.39028	1.48e-10	7.29e-09	14.1593
Cd9	-1.21764	7.21931	-9.37929	1.52e-10	7.46e-09	13.7798
Scpep1	-1.50259	7.07245	-9.3727	1.54e-10	7.56e-09	13.7703
Adamts12	-2.9171	1.94447	-9.36385	1.58e-10	7.7e-09	14.0829
Csf1r	-3.2891	2.06266	-9.35814	1.6e-10	7.78e-09	14.0744
Sirt3	1.20648	5.01943	9.35447	1.61e-10	7.82e-09	13.8444
Tspan15	-2.26703	5.19241	-9.32656	1.73e-10	8.35e-09	13.8502
Ect2	-1.5015	4.38332	-9.32189	1.75e-10	8.42e-09	13.8457
Pla2g5	-2.95776	2.18657	-9.31461	1.78e-10	8.52e-09	13.974
Slco2b1	-2.87933	0.9918	-9.3143	1.78e-10	8.52e-09	13.9758
Bnc2	-2.32988	0.680687	-9.31203	1.79e-10	8.54e-09	13.9711
S1pr3	-3.68198	4.15376	-9.30739	1.81e-10	8.61e-09	13.8649
Igfbp2	-2.11953	8.28791	-9.28694	1.9e-10	9.02e-09	13.535
Atoh8	-2.74307	2.96193	-9.28592	1.91e-10	9.02e-09	13.8775
Col5a2	-3.00865	3.74011	-9.28045	1.94e-10	9.11e-09	13.8131
Prrg4	-2.35553	2.38362	-9.27356	1.97e-10	9.24e-09	13.8738
S100a16	-1.04293	7.57027	-9.2634	2.02e-10	9.44e-09	13.4774
Lfng	-1.42613	5.70007	-9.2616	2.03e-10	9.46e-09	13.5648
Iqgap1	-1.48475	5.2101	-9.25613	2.06e-10	9.55e-09	13.5736
Pcsk1n	1.44306	8.22394	9.23932	2.14e-10	9.93e-09	13.4029
Insl6	-2.96007	1.21898	-9.23631	2.16e-10	9.95e-09	13.7879
Lrrc25	-2.57607	0.49912	-9.23594	2.16e-10	9.95e-09	13.787
Slc39a12	-1.93072	5.54837	-9.22623	2.21e-10	1.02e-08	13.5552
Pear1	-2.69718	0.671649	-9.21714	2.26e-10	1.04e-08	13.7383
B3gat1	1.28379	8.68006	9.21525	2.27e-10	1.04e-08	13.337
Phldb2	-2.31994	2.55084	-9.20634	2.33e-10	1.06e-08	13.6725
Msn	-2.04599	6.08336	-9.20072	2.36e-10	1.07e-08	13.4228
Itih2	-2.72225	1.17621	-9.19168	2.41e-10	1.09e-08	13.6782
Rps6kl1	1.66549	4.38249	9.18766	2.44e-10	1.1e-08	13.4511
Sema4a	1.48548	4.19205	9.18688	2.44e-10	1.1e-08	13.4429
Adgra2	-2.16026	2.46407	-9.17447	2.52e-10	1.13e-08	13.5724
Fndc4	1.11339	6.25296	9.16773	2.56e-10	1.14e-08	13.2688
Ephx1	-1.52792	8.1178	-9.16162	2.6e-10	1.16e-08	13.2471
Pgm5	-3.04648	1.81207	-9.1581	2.62e-10	1.16e-08	13.5944
Nid2	-2.96286	3.78779	-9.15259	2.66e-10	1.17e-08	13.4712
Gm20743	-2.63594	3.37889	-9.14426	2.71e-10	1.2e-08	13.5282
Gusb	-2.34574	3.47078	-9.14239	2.73e-10	1.2e-08	13.4874
Tnfaip2	-2.61193	1.56566	-9.14	2.74e-10	1.2e-08	13.5491
Kank4	-2.75183	2.33211	-9.12795	2.83e-10	1.23e-08	13.5004
Tbx15	-2.66598	0.806305	-9.12509	2.85e-10	1.24e-08	13.5159
Ccnb2	-1.39904	4.01262	-9.12416	2.85e-10	1.24e-08	13.3964
Fcgrt	-1.93127	3.54545	-9.11558	2.92e-10	1.26e-08	13.3908
Gxylt2	-1.85775	2.32867	-9.112	2.94e-10	1.27e-08	13.4499
Apbb1ip	-2.61517	2.28697	-9.10944	2.96e-10	1.27e-08	13.4453
Syt1	1.2074	8.56687	9.08912	3.11e-10	1.34e-08	13.0197
Aldh2	-1.08989	6.75056	-9.05241	3.41e-10	1.46e-08	12.9802
Fli1	-2.43042	1.04741	-9.04597	3.47e-10	1.48e-08	13.3237
Atf3	-2.3609	4.33456	-9.03602	3.56e-10	1.51e-08	13.2303
Fgl2	-2.41651	2.58119	-9.03572	3.56e-10	1.51e-08	13.2613
Hs3st2	2.05327	4.74706	9.02674	3.64e-10	1.54e-08	13.0177
Hcls1	-3.5711	1.94951	-9.02038	3.7e-10	1.55e-08	13.2456
Fam167a	-1.22262	4.99942	-9.02026	3.7e-10	1.55e-08	13.005
Pfkl	1.37317	5.484	9.00813	3.81e-10	1.6e-08	12.9178
Ak3	-1.19387	6.81049	-8.97105	4.19e-10	1.74e-08	12.7805
Slc16a1	-1.50844	6.57706	-8.97067	4.19e-10	1.74e-08	12.8039
Ttyh2	-1.6582	5.76885	-8.96648	4.24e-10	1.75e-08	12.864
Sat1	-1.36655	4.68312	-8.9663	4.24e-10	1.75e-08	12.9284
Bin2	-2.76069	0.537043	-8.94791	4.44e-10	1.83e-08	13.0834
Nuf2	-1.82482	4.25608	-8.94614	4.46e-10	1.83e-08	12.9335
Ccl6	-2.65477	0.742937	-8.92454	4.71e-10	1.93e-08	13.0252
Cthrc1	-2.45664	3.33755	-8.92246	4.73e-10	1.94e-08	12.915
Prelp	-2.35318	5.06995	-8.91766	4.79e-10	1.95e-08	12.811
Abca9	-2.41014	0.860753	-8.905	4.95e-10	2.01e-08	12.9773
Cdhr1	1.80637	3.49976	8.89231	5.11e-10	2.07e-08	12.8008
Rbp1	-1.66698	4.19897	-8.89013	5.13e-10	2.08e-08	12.8164
Cd33	-2.03644	0.0751553	-8.88541	5.2e-10	2.1e-08	12.9301
Tpm2	-2.66077	2.18919	-8.88309	5.23e-10	2.1e-08	12.8987
Tfcp2l1	-2.7879	3.21347	-8.88302	5.23e-10	2.1e-08	12.8493
Car3	-2.52191	2.30342	-8.88149	5.25e-10	2.1e-08	12.91
Casc5	-1.61779	2.86325	-8.87211	5.37e-10	2.14e-08	12.8292
Fas	-3.43153	1.88052	-8.85245	5.65e-10	2.25e-08	12.8402
Csf2rb2	-2.63186	0.770582	-8.84819	5.71e-10	2.26e-08	12.8363
Adgre1	-2.92787	1.38129	-8.83849	5.85e-10	2.31e-08	12.8114
Prex2	-2.51324	4.40501	-8.82858	6e-10	2.37e-08	12.6163
Flnc	-3.10807	3.01509	-8.82662	6.03e-10	2.37e-08	12.7265
Akr1b8	-2.23458	0.737872	-8.82011	6.13e-10	2.41e-08	12.7639
Creg2	1.62218	5.5325	8.80207	6.42e-10	2.51e-08	12.3742
Ctnna1	-1.77761	6.95962	-8.80167	6.42e-10	2.51e-08	12.3651
Cnn3	-1.21374	9.65037	-8.8007	6.44e-10	2.51e-08	12.2755
Msrb3	-3.01466	2.59975	-8.79721	6.5e-10	2.52e-08	12.6919
Smyd5	1.47286	5.41197	8.79197	6.58e-10	2.55e-08	12.3657
Ly86	-2.75181	0.988276	-8.78479	6.7e-10	2.59e-08	12.6791
Slc43a3	-3.23193	1.71895	-8.77704	6.84e-10	2.63e-08	12.6556
Kif23	-1.58548	4.06708	-8.76105	7.12e-10	2.73e-08	12.4522
Enkur	-2.35758	3.41737	-8.75076	7.31e-10	2.79e-08	12.538
Tpi1	1.61807	8.96296	8.7507	7.31e-10	2.79e-08	12.1538
Dhcr7	1.2479	7.81931	8.74767	7.37e-10	2.81e-08	12.1482
Slc15a3	-3.2649	1.59373	-8.74146	7.48e-10	2.84e-08	12.55
Plekha4	-2.35408	2.04864	-8.73512	7.61e-10	2.88e-08	12.5247
Col4a4	-2.54101	1.20663	-8.72246	7.85e-10	2.97e-08	12.5231
Ltbp2	-3.2298	1.88755	-8.7198	7.91e-10	2.98e-08	12.4991
Tns3	-1.42188	7.48425	-8.71715	7.96e-10	2.99e-08	12.108
Scd4	-2.67162	2.41343	-8.71273	8.05e-10	3.02e-08	12.492
Otud7b	-1.52985	4.64193	-8.70563	8.2e-10	3.07e-08	12.2454
Mmab	1.16519	5.56145	8.70159	8.28e-10	3.09e-08	12.1082
Plekhb1	-1.57906	5.75521	-8.70034	8.31e-10	3.09e-08	12.1896
Rnd3	-1.47272	6.23573	-8.67321	8.91e-10	3.31e-08	12.027
Casp8	-2.40618	0.353798	-8.66469	9.1e-10	3.37e-08	12.3817
Arhgap25	-2.61469	1.44276	-8.65571	9.31e-10	3.44e-08	12.338
Fkbp10	-1.58524	4.45298	-8.65131	9.42e-10	3.47e-08	12.1331
Morf4l2	-1.54294	8.49614	-8.64978	9.46e-10	3.47e-08	11.9068
Cmklr1	-2.30755	0.921944	-8.6461	9.54e-10	3.5e-08	12.3317
D17H6S56E-5	-1.67155	2.90594	-8.63758	9.76e-10	3.56e-08	12.226
Slc40a1	-2.51518	1.71782	-8.63659	9.78e-10	3.56e-08	12.2914
Hpcal4	1.43617	6.4014	8.63547	9.81e-10	3.57e-08	11.9052
Bst2	-2.81953	2.45481	-8.63047	9.93e-10	3.6e-08	12.2724
Kat2b	-1.65533	4.74135	-8.62866	9.98e-10	3.61e-08	12.0384
Hcn2	1.30326	5.90931	8.62559	1.01e-09	3.62e-08	11.9206
Myo10	-2.07793	2.45575	-8.62557	1.01e-09	3.62e-08	12.226
Ccnd2	-1.14154	7.8956	-8.62166	1.02e-09	3.65e-08	11.8393
Dock8	-2.80041	1.46139	-8.61694	1.03e-09	3.68e-08	12.2522
S100a10	1.26537	5.89656	8.61647	1.03e-09	3.68e-08	11.8849
Itga1	-3.11153	3.18923	-8.60328	1.07e-09	3.8e-08	12.1902
Celf4	1.13003	8.69757	8.58412	1.12e-09	3.97e-08	11.7257
Gtse1	-1.4606	4.09435	-8.58375	1.12e-09	3.97e-08	12.003
Spock2	1.47889	8.08124	8.57256	1.15e-09	4.08e-08	11.7012
Arhgap29	-1.15012	4.75586	-8.56743	1.17e-09	4.11e-08	11.8369
Trp53inp1	-1.30509	5.80829	-8.56712	1.17e-09	4.11e-08	11.7804
Esco2	-2.07145	2.87782	-8.55631	1.2e-09	4.22e-08	12.0169
Tox	1.24553	5.82654	8.55185	1.22e-09	4.26e-08	11.7779
Cdk1	-1.29435	5.46158	-8.54328	1.24e-09	4.34e-08	11.7484
Gjc3	-2.02304	3.54033	-8.53781	1.26e-09	4.39e-08	11.9362
Ckap2	-1.70196	4.19699	-8.53177	1.28e-09	4.45e-08	11.8836
Ulbp1	-2.06493	0.1001	-8.52241	1.31e-09	4.55e-08	12.0249
Srcin1	1.15836	7.09893	8.51287	1.34e-09	4.64e-08	11.5646
Ttc12	-2.78105	2.38271	-8.51284	1.34e-09	4.64e-08	11.9893
Tyms	-1.80545	2.60529	-8.50543	1.37e-09	4.72e-08	11.8675
Tmem91	2.22244	2.65864	8.50329	1.38e-09	4.73e-08	11.9007
Tspan12	-1.01335	6.31471	-8.49819	1.4e-09	4.78e-08	11.587
Aldh1a7	-2.47929	1.76783	-8.49175	1.42e-09	4.85e-08	11.9427
Rasgrp3	-2.84217	0.688755	-8.49107	1.42e-09	4.85e-08	11.943
Casp12	-2.56099	0.938262	-8.48781	1.43e-09	4.88e-08	11.9363
Tmpo	-1.09631	7.09128	-8.48619	1.44e-09	4.89e-08	11.5
Cckbr	2.55325	3.08122	8.48115	1.46e-09	4.94e-08	11.8312
Tmem176b	-1.05195	6.59011	-8.47879	1.47e-09	4.96e-08	11.5142
Uaca	-1.85347	3.38681	-8.47358	1.49e-09	5.01e-08	11.8061
Vstm5	2.27557	2.37597	8.46883	1.5e-09	5.06e-08	11.8102
Il10rb	-2.34751	3.1885	-8.46056	1.54e-09	5.16e-08	11.7475
Lrrc16b	1.18179	5.25185	8.45643	1.55e-09	5.2e-08	11.5187
Ecm2	-2.99749	2.06406	-8.45138	1.57e-09	5.26e-08	11.8289
Frrs1	-2.0482	1.74462	-8.44894	1.58e-09	5.28e-08	11.8169
Synpo2	-2.54546	4.43042	-8.44538	1.6e-09	5.32e-08	11.6574
Svil	-1.485	3.67777	-8.439	1.63e-09	5.39e-08	11.6652
Rasal1	1.9768	3.37061	8.43293	1.65e-09	5.46e-08	11.5834
Arhgap18	-1.77996	4.18039	-8.41504	1.73e-09	5.71e-08	11.5968
Col11a2	-2.36677	2.01631	-8.41129	1.75e-09	5.75e-08	11.6887
Prdx6	-2.15563	8.23531	-8.40878	1.76e-09	5.78e-08	11.2891
Ctnnal1	-2.28184	4.45129	-8.39416	1.83e-09	5.98e-08	11.5388
Scamp5	0.997765	7.77098	8.3891	1.85e-09	6.05e-08	11.2339
Vegfd	2.34326	2.78395	8.37643	1.91e-09	6.24e-08	11.57
Kif20a	-1.47607	4.91294	-8.37403	1.92e-09	6.26e-08	11.3218
Kcnn1	1.6114	4.39878	8.36397	1.97e-09	6.41e-08	11.3562
Bub1b	-1.32722	4.07555	-8.35765	2.01e-09	6.5e-08	11.3775
Fosb	-3.94535	3.16189	-8.35648	2.01e-09	6.51e-08	11.5842
Fyb	-2.66336	1.1815	-8.34755	2.06e-09	6.65e-08	11.5763
Rin2	-1.38118	5.00788	-8.33615	2.12e-09	6.83e-08	11.2573
Aldh3b1	-2.74569	2.57057	-8.33355	2.14e-09	6.86e-08	11.5111
Ppic	-1.92715	4.72095	-8.33197	2.14e-09	6.88e-08	11.3259
Adamtsl3	-2.73062	2.21649	-8.3283	2.17e-09	6.91e-08	11.5123
Emilin1	-2.14903	2.08372	-8.32826	2.17e-09	6.91e-08	11.4749
Gli1	-2.29498	1.09064	-8.32353	2.19e-09	6.98e-08	11.5005
Nuak2	-2.67856	3.89459	-8.32216	2.2e-09	6.99e-08	11.3569
Postn	-2.00062	3.39707	-8.3177	2.23e-09	7.06e-08	11.3747
Dnali1	-2.45855	3.3499	-8.31176	2.26e-09	7.15e-08	11.4581
Stat2	1.32935	4.4732	8.30312	2.31e-09	7.3e-08	11.1764
Pea15a	-1.02116	10.886	-8.29907	2.34e-09	7.36e-08	10.9638
Sfrp5	-2.77041	1.10246	-8.29769	2.34e-09	7.37e-08	11.4395
Cd300c2	-2.21891	0.61343	-8.29442	2.36e-09	7.41e-08	11.4461
Blnk	-3.04853	1.73082	-8.29021	2.39e-09	7.48e-08	11.4122
Arc	-2.31912	3.27041	-8.28434	2.43e-09	7.58e-08	11.3199
Slc6a1	0.792008	9.43308	8.28163	2.44e-09	7.62e-08	10.9306
Pdgfd	-1.84312	2.43108	-8.2781	2.47e-09	7.67e-08	11.3458
St6galnac5	1.12709	6.66511	8.27458	2.49e-09	7.71e-08	10.9592
0610007P14Rik	1.16212	6.70647	8.27452	2.49e-09	7.71e-08	10.9545
Hfe	-2.10543	2.54342	-8.27329	2.5e-09	7.72e-08	11.3281
Efnb3	1.03297	6.9345	8.26766	2.54e-09	7.81e-08	10.923
Pla2g7	-1.28805	9.35572	-8.26421	2.56e-09	7.87e-08	10.8986
Fmo1	-1.77972	2.87118	-8.25857	2.6e-09	7.97e-08	11.2109
Arhgef6	-2.50469	3.31023	-8.24057	2.72e-09	8.33e-08	11.2334
Adamts4	-1.42357	3.82349	-8.23288	2.78e-09	8.48e-08	11.0033
Cd109	-3.06081	3.37784	-8.23112	2.79e-09	8.49e-08	11.2338
Crtap	-1.32678	4.9782	-8.23054	2.79e-09	8.49e-08	11.0195
Tlr13	-2.78621	1.40398	-8.22997	2.8e-09	8.49e-08	11.2613
Abcg4	1.09156	5.62884	8.22776	2.81e-09	8.52e-08	10.8941
Plch2	1.3287	4.07281	8.22227	2.85e-09	8.63e-08	11.0375
Pon3	-2.78038	1.03872	-8.22099	2.86e-09	8.64e-08	11.2514
Il4ra	-1.84648	2.47823	-8.19927	3.03e-09	9.13e-08	11.1204
Ccnd3	-1.13084	6.14302	-8.19339	3.08e-09	9.25e-08	10.7789
Ncf1	-2.86629	1.11034	-8.18925	3.11e-09	9.32e-08	11.1712
Cyp51	1.14932	6.97453	8.18882	3.11e-09	9.32e-08	10.7113
Idh2	-1.47924	6.63278	-8.18447	3.15e-09	9.41e-08	10.7689
Slc25a1	1.02525	7.06196	8.18311	3.16e-09	9.42e-08	10.7014
Efemp2	-1.62333	5.04543	-8.18033	3.18e-09	9.47e-08	10.8699
Tnfrsf1b	-2.81412	2.17396	-8.17248	3.25e-09	9.65e-08	11.0829
Slc37a2	-2.47853	1.27614	-8.1681	3.29e-09	9.74e-08	11.1079
Hvcn1	-2.23064	2.43975	-8.16657	3.3e-09	9.76e-08	11.0407
Aass	-2.28346	0.941096	-8.16342	3.33e-09	9.82e-08	11.1121
Galnt4	-1.80692	2.4014	-8.14641	3.48e-09	1.02e-07	11.0009
Pter	-2.0081	2.89114	-8.14435	3.5e-09	1.03e-07	11.0023
Folr2	-2.49838	0.474471	-8.14369	3.51e-09	1.03e-07	11.0609
Frmd7	-1.73257	2.88999	-8.14256	3.52e-09	1.03e-07	11.0026
Serpinh1	-1.57116	6.59763	-8.13696	3.57e-09	1.04e-07	10.6265
Wnt5a	-1.72096	4.45607	-8.1365	3.57e-09	1.04e-07	10.8329
Igfbp3	-1.73549	6.64795	-8.1354	3.58e-09	1.04e-07	10.6109
Fam107a	-2.26564	3.86861	-8.13508	3.59e-09	1.04e-07	10.8821
Il6st	-1.77772	7.55043	-8.13432	3.59e-09	1.04e-07	10.5826
Nusap1	-1.11902	4.32966	-8.12688	3.66e-09	1.06e-07	10.7641
Stard4	1.34015	5.68452	8.12513	3.68e-09	1.06e-07	10.567
Phf19	-1.64039	2.5013	-8.1192	3.74e-09	1.08e-07	10.9068
Ston1	-1.98688	3.75654	-8.11056	3.82e-09	1.1e-07	10.8361
Clcn6	0.761026	7.76913	8.10083	3.92e-09	1.12e-07	10.4705
Slc6a11	1.09616	8.03533	8.09438	3.99e-09	1.14e-07	10.4492
Cntnap3	1.86444	3.07415	8.09337	4e-09	1.14e-07	10.8141
Aqp4	-1.55276	7.97874	-8.08889	4.05e-09	1.15e-07	10.4502
Parp9	-2.18431	2.61171	-8.07901	4.15e-09	1.18e-07	10.8379
Synpo	1.16092	3.71945	8.07383	4.21e-09	1.2e-07	10.6111
Mrgprf	-2.1297	-0.0724277	-8.05702	4.4e-09	1.25e-07	10.8283
Psmb8	-2.61902	1.84536	-8.05018	4.48e-09	1.27e-07	10.7951
Kctd7	1.27435	3.18029	8.04928	4.49e-09	1.27e-07	10.6029
Kdelr3	-1.98223	2.22415	-8.04418	4.55e-09	1.28e-07	10.7494
Gjb2	-2.56462	1.32862	-8.0426	4.57e-09	1.28e-07	10.7766
Slc11a1	-3.20872	1.8775	-8.0423	4.58e-09	1.28e-07	10.781
Ptpn13	-2.65227	3.82329	-8.03601	4.65e-09	1.3e-07	10.663
Gramd2	1.92012	2.76217	8.03399	4.68e-09	1.31e-07	10.6207
Dock2	-2.24938	0.537519	-8.03134	4.71e-09	1.31e-07	10.7687
Adamts18	2.4651	2.83645	8.02457	4.79e-09	1.33e-07	10.6545
Nek6	-1.07301	6.4058	-8.01709	4.89e-09	1.36e-07	10.3199
Slc2a4	-1.66822	2.79874	-8.00053	5.11e-09	1.42e-07	10.5974
Ppp2r1a	0.813108	10.0886	7.99942	5.12e-09	1.42e-07	10.1713
Snx32	0.867577	6.06644	7.99288	5.21e-09	1.44e-07	10.2357
Mobp	-3.16849	1.72246	-7.98881	5.27e-09	1.45e-07	10.6289
Mmp14	-1.30723	5.76224	-7.98717	5.29e-09	1.46e-07	10.2585
Cast	-2.05643	2.85317	-7.97804	5.42e-09	1.49e-07	10.5577
Rbms2	-1.18159	4.85364	-7.97417	5.48e-09	1.5e-07	10.3508
Chst14	-2.15666	2.1237	-7.97167	5.51e-09	1.51e-07	10.5755
Stat6	-2.50795	1.68924	-7.96717	5.58e-09	1.52e-07	10.5501
Zfr2	1.0568	4.45749	7.96302	5.64e-09	1.54e-07	10.2541
Tlr8	-2.27883	-0.0384022	-7.96258	5.65e-09	1.54e-07	10.5943
Decr1	-1.18695	5.56801	-7.9354	6.07e-09	1.65e-07	10.2244
Cd44	-2.1781	4.68539	-7.92632	6.22e-09	1.68e-07	10.2771
Lhfp	-1.35773	5.8761	-7.91674	6.38e-09	1.72e-07	10.0575
Arhgap39	0.877095	5.84824	7.9078	6.53e-09	1.76e-07	10.0141
Crabp2	-2.12473	0.146541	-7.90554	6.57e-09	1.77e-07	10.4464
Kcnk6	-1.85642	0.377477	-7.90075	6.65e-09	1.79e-07	10.4305
Melk	-1.36074	2.81543	-7.90021	6.66e-09	1.79e-07	10.2753
Cd37	-2.86818	1.11267	-7.89878	6.69e-09	1.79e-07	10.4103
Ms4a6b	-2.16883	0.0886978	-7.89607	6.73e-09	1.8e-07	10.4227
Scube1	1.24233	5.77163	7.89371	6.78e-09	1.81e-07	9.96994
Rasgef1c	1.43348	4.52914	7.89054	6.83e-09	1.82e-07	10.0816
Apoc1	-1.78547	1.52153	-7.88942	6.85e-09	1.82e-07	10.3865
Rhoj	-1.59683	3.22248	-7.88537	6.93e-09	1.84e-07	10.2515
Itm2c	-0.998951	9.25491	-7.87793	7.07e-09	1.87e-07	9.85944
Fcgr1	-2.68104	0.643362	-7.87368	7.15e-09	1.89e-07	10.3594
Gm973	-2.41002	4.43254	-7.87366	7.15e-09	1.89e-07	10.19
Cd14	-2.74649	1.11878	-7.8532	7.55e-09	1.99e-07	10.2992
Dnase1l1	-2.25387	1.11206	-7.84702	7.67e-09	2.02e-07	10.2822
Gpx8	-2.0631	4.81221	-7.84189	7.78e-09	2.04e-07	10.0409
Tm7sf2	1.5116	4.86205	7.83624	7.89e-09	2.07e-07	9.86705
Ncf2	-3.03453	1.49653	-7.83366	7.95e-09	2.08e-07	10.2308
Adam11	1.25767	4.80427	7.82949	8.04e-09	2.1e-07	9.87522
Tnc	-1.3965	6.64833	-7.82616	8.11e-09	2.11e-07	9.76087
Dynlrb2	-2.4269	3.56809	-7.82455	8.14e-09	2.12e-07	10.1871
A2m	-2.28371	3.64783	-7.82026	8.24e-09	2.14e-07	10.0845
Prkar1b	1.02692	8.74736	7.82012	8.24e-09	2.14e-07	9.70423
Icam1	-2.62491	1.08827	-7.81824	8.28e-09	2.14e-07	10.2132
Uap1l1	-1.36586	4.0393	-7.81586	8.33e-09	2.15e-07	10.0024
BC064078	-2.01643	3.75133	-7.81505	8.35e-09	2.15e-07	10.0581
Lif	-2.11655	0.918913	-7.81298	8.4e-09	2.16e-07	10.2052
Hspb6	-2.03797	3.30821	-7.80931	8.48e-09	2.18e-07	10.0497
Gabbr1	1.04272	8.78729	7.8079	8.51e-09	2.18e-07	9.67166
Rdh11	0.9206	7.25781	7.80723	8.53e-09	2.18e-07	9.6912
Ms4a6d	-2.88572	1.02423	-7.80618	8.55e-09	2.19e-07	10.1767
Dhrs1	-1.26583	8.00516	-7.80024	8.69e-09	2.22e-07	9.66971
Ahnak	-4.48135	5.03808	-7.79917	8.71e-09	2.22e-07	10.0388
Ldlr	1.2386	6.10147	7.79649	8.78e-09	2.23e-07	9.68649
Xkr5	-2.0578	0.612162	-7.79309	8.86e-09	2.25e-07	10.151
Rln1	-2.03805	2.34952	-7.78964	8.94e-09	2.26e-07	10.0906
Ifi30	-1.20448	4.82431	-7.78866	8.96e-09	2.27e-07	9.85653
Stk32c	1.22785	5.37071	7.78403	9.07e-09	2.29e-07	9.74957
Gys1	1.06178	5.52566	7.78113	9.14e-09	2.3e-07	9.7032
Kifc2	1.22	6.67294	7.7775	9.23e-09	2.32e-07	9.60923
Ckmt1	1.39511	5.69912	7.7758	9.27e-09	2.33e-07	9.69461
Phf1	1.06597	3.64376	7.7582	9.72e-09	2.44e-07	9.83814
Ggta1	-2.37348	2.3226	-7.75427	9.82e-09	2.46e-07	9.96961
Ctsb	-1.07985	10.0443	-7.75343	9.84e-09	2.46e-07	9.51336
Cntnap4	1.48496	4.49245	7.75303	9.85e-09	2.46e-07	9.72039
Klhl26	0.959111	4.61553	7.75155	9.89e-09	2.46e-07	9.6786
Adk	-1.4406	6.38253	-7.74486	1.01e-08	2.5e-07	9.57451
Ugt8a	-1.46225	4.17213	-7.74111	1.02e-08	2.52e-07	9.77977
Fermt3	-2.23564	0.864465	-7.73615	1.03e-08	2.55e-07	10.0005
Pf4	-2.3915	0.771003	-7.7338	1.04e-08	2.56e-07	9.99267
Iqub	-2.3015	1.47669	-7.73126	1.04e-08	2.58e-07	9.98914
Nol4l	0.949453	6.9864	7.72253	1.07e-08	2.63e-07	9.48041
Bambi	-1.74468	3.91368	-7.71722	1.08e-08	2.67e-07	9.77282
Ctgf	-1.86036	6.4618	-7.7161	1.09e-08	2.67e-07	9.50169
Lss	1.40577	5.89408	7.70608	1.12e-08	2.74e-07	9.44015
Ptp4a3	1.01022	5.6652	7.70456	1.12e-08	2.74e-07	9.49776
Bmp7	-1.10683	4.74504	-7.70405	1.12e-08	2.74e-07	9.54695
Cnih2	1.17087	7.48751	7.69736	1.14e-08	2.79e-07	9.39529
Dlk2	1.23978	3.68601	7.69444	1.15e-08	2.81e-07	9.65416
Kif2c	-1.17437	3.46775	-7.68501	1.18e-08	2.87e-07	9.68683
Mob3b	-2.08765	3.19724	-7.67902	1.2e-08	2.91e-07	9.74979
Exosc3	-1.02423	4.19721	-7.66213	1.26e-08	3.04e-07	9.53173
Rab31	-0.98534	7.82652	-7.66085	1.26e-08	3.05e-07	9.29734
Trip6	-1.84915	4.04909	-7.66057	1.26e-08	3.05e-07	9.63339
Arhgap17	-1.40949	4.34481	-7.6567	1.28e-08	3.07e-07	9.56541
Gsg1l	1.59803	3.98732	7.65441	1.28e-08	3.08e-07	9.54674
Shf	1.18504	5.08748	7.65412	1.28e-08	3.08e-07	9.3944
Selplg	-2.25667	0.296905	-7.64506	1.32e-08	3.15e-07	9.7648
Epb41l1	1.03958	8.01785	7.64479	1.32e-08	3.15e-07	9.2447
Msx1os	-2.09692	2.25845	-7.63814	1.34e-08	3.2e-07	9.65505
Bend6	1.18315	7.08372	7.63624	1.35e-08	3.21e-07	9.24706
Tep1	-2.5127	1.67852	-7.62666	1.38e-08	3.29e-07	9.69245
Lrfn1	1.1989	4.62536	7.62075	1.4e-08	3.34e-07	9.29386
Irf8	-2.36656	1.98685	-7.62008	1.41e-08	3.34e-07	9.6156
Hbp1	-1.10074	6.38491	-7.61738	1.42e-08	3.36e-07	9.28085
Anxa6	-0.937567	6.97316	-7.61402	1.43e-08	3.38e-07	9.19492
Plcd4	-1.65201	5.83595	-7.61388	1.43e-08	3.38e-07	9.3158
Cgrrf1	-1.50842	3.92278	-7.60842	1.45e-08	3.42e-07	9.50604
Antxr1	-1.22046	5.7848	-7.60188	1.48e-08	3.48e-07	9.21695
Wipf1	-1.29788	4.49405	-7.6011	1.48e-08	3.48e-07	9.35541
Tpx2	-1.20112	4.51529	-7.60027	1.48e-08	3.48e-07	9.32582
Stac	1.65782	2.65373	7.59578	1.5e-08	3.52e-07	9.50375
Plekhb2	0.943886	7.97662	7.59388	1.51e-08	3.53e-07	9.10344
Dnase2a	-2.02223	3.00352	-7.59179	1.52e-08	3.54e-07	9.53153
Agtrap	-1.21713	4.80114	-7.59048	1.52e-08	3.55e-07	9.32112
Insig1	1.08746	7.0235	7.58507	1.55e-08	3.6e-07	9.09808
Slc16a3	2.03419	2.863	7.58229	1.56e-08	3.62e-07	9.36479
Kank2	-1.30046	4.2826	-7.57926	1.57e-08	3.64e-07	9.29482
Lipa	-2.00141	3.75325	-7.57456	1.59e-08	3.68e-07	9.38423
Mpp5	-1.72695	5.47306	-7.57185	1.6e-08	3.7e-07	9.26124
AI413582	0.944349	6.4412	7.56027	1.65e-08	3.81e-07	9.05683
Plekho2	-1.42482	4.92972	-7.55307	1.68e-08	3.88e-07	9.16508
Gpi1	0.930585	8.88964	7.55209	1.69e-08	3.89e-07	8.97834
Ccna2	-1.12866	5.81387	-7.54892	1.7e-08	3.91e-07	9.08078
Lhpp	0.960363	5.50222	7.53945	1.75e-08	4.01e-07	9.07954
Glipr1	-2.56891	1.37053	-7.53782	1.76e-08	4.02e-07	9.46221
Il12rb2	-2.30706	0.49909	-7.53633	1.76e-08	4.03e-07	9.47224
Clu	-1.13058	10.0751	-7.53088	1.79e-08	4.08e-07	8.91465
Dgkg	1.89948	3.84788	7.52965	1.79e-08	4.09e-07	9.24844
Vstm4	-1.66448	3.31744	-7.52699	1.81e-08	4.11e-07	9.331
Nsdhl	1.41624	7.24184	7.524	1.82e-08	4.14e-07	8.92484
Fezf2	2.05112	4.95776	7.52231	1.83e-08	4.15e-07	9.04099
Trim30a	-2.58889	1.28825	-7.521	1.84e-08	4.16e-07	9.4322
Vcl	-1.48792	5.80658	-7.51536	1.86e-08	4.22e-07	9.01954
Hapln1	-1.40406	5.51656	-7.51486	1.87e-08	4.22e-07	9.04325
Kcne1l	-2.36981	3.89386	-7.50323	1.93e-08	4.34e-07	9.25435
Cp	-2.86567	1.42879	-7.4927	1.98e-08	4.46e-07	9.35204
Tpp1	-1.15878	6.22816	-7.49251	1.98e-08	4.46e-07	8.93247
Gfra2	1.38501	4.68801	7.48881	2e-08	4.5e-07	9.02858
Vwf	-2.06525	0.0646827	-7.48676	2.01e-08	4.51e-07	9.35085
Bcorl1	0.936611	5.64139	7.47976	2.05e-08	4.59e-07	8.88638
Espn	2.07568	1.1694	7.47972	2.05e-08	4.59e-07	9.29406
Rgs11	1.98634	1.69032	7.47383	2.09e-08	4.65e-07	9.2513
Ctsl	-1.1439	8.91182	-7.47204	2.1e-08	4.67e-07	8.76445
Cxcl16	-2.23774	1.79704	-7.46862	2.12e-08	4.7e-07	9.27101
Begain	1.01	6.25936	7.46131	2.16e-08	4.79e-07	8.79705
Prokr2	1.03163	5.61106	7.45866	2.17e-08	4.82e-07	8.81259
Gnai1	0.945582	7.7698	7.45618	2.19e-08	4.84e-07	8.73144
Angptl2	-1.96687	1.69901	-7.45396	2.2e-08	4.86e-07	9.23268
Sez6l2	1.14801	7.5274	7.45084	2.22e-08	4.9e-07	8.71988
Col7a1	-1.97606	1.11704	-7.44748	2.24e-08	4.92e-07	9.20485
Aacs	1.02107	6.67412	7.44744	2.24e-08	4.92e-07	8.7225
Coro2a	1.25238	5.34588	7.44739	2.24e-08	4.92e-07	8.78282
Sncaip	-1.26579	5.26831	-7.44496	2.26e-08	4.95e-07	8.85794
Ecm1	-2.26769	2.56392	-7.44285	2.27e-08	4.97e-07	9.15196
Arhgef15	2.17215	1.09855	7.44033	2.28e-08	4.99e-07	9.2031
Cck	1.72706	4.37202	7.4396	2.29e-08	4.99e-07	8.89061
Cdk6	-1.69598	3.48396	-7.43718	2.3e-08	5.02e-07	9.07047
Epha3	-0.958525	5.32534	-7.42409	2.39e-08	5.19e-07	8.73014
Heyl	-2.23388	0.21476	-7.41853	2.42e-08	5.26e-07	9.13931
Prtn3	1.41743	2.4292	7.41273	2.46e-08	5.34e-07	9.03671
Slc24a4	-3.34283	3.2445	-7.41156	2.47e-08	5.35e-07	9.08251
Cd300lb	-2.05135	-0.159108	-7.40358	2.52e-08	5.46e-07	9.13034
Gper1	-2.23421	1.84341	-7.40248	2.53e-08	5.46e-07	9.03802
Fgf13	1.08387	6.74365	7.38467	2.66e-08	5.73e-07	8.5689
Adgrb2	0.757097	7.60937	7.38146	2.68e-08	5.77e-07	8.52665
Phactr3	1.03122	6.54797	7.38044	2.69e-08	5.78e-07	8.55341
Osmr	-2.84975	3.09389	-7.36749	2.78e-08	5.97e-07	8.90251
Adamtsl4	-2.1416	1.3651	-7.3619	2.82e-08	6.06e-07	8.98084
Mrap2	2.00051	0.88877	7.36103	2.83e-08	6.06e-07	9.00215
1700007K13Rik	-1.46743	3.61231	-7.3586	2.85e-08	6.09e-07	8.89302
Casr	2.06652	0.423771	7.35281	2.9e-08	6.18e-07	8.97892
Wwtr1	-1.6923	5.68838	-7.34939	2.92e-08	6.23e-07	8.64532
Tap2	-1.9482	3.52223	-7.34359	2.97e-08	6.32e-07	8.83386
Nxph1	1.21633	6.00262	7.34203	2.98e-08	6.33e-07	8.49176
Rxra	-1.17105	5.72366	-7.3406	2.99e-08	6.35e-07	8.53869
Hsd17b7	0.814594	5.6456	7.33783	3.02e-08	6.39e-07	8.45147
Cdc42ep1	-1.66158	4.347	-7.33342	3.05e-08	6.46e-07	8.68207
Cebpa	-1.60368	2.44412	-7.33041	3.08e-08	6.49e-07	8.83804
Pacs1	0.954184	5.90581	7.33022	3.08e-08	6.49e-07	8.44714
Stk32b	1.3687	5.43842	7.32235	3.15e-08	6.62e-07	8.45678
Hist1h1a	-1.04438	5.89565	-7.32063	3.16e-08	6.65e-07	8.40246
Mki67	-1.41326	4.50104	-7.31457	3.21e-08	6.75e-07	8.58027
Irf5	-2.25849	1.13451	-7.31132	3.24e-08	6.8e-07	8.85827
Cfap52	-2.05333	2.34091	-7.30862	3.27e-08	6.84e-07	8.84551
Fgfr1op2	-1.38268	4.69472	-7.30618	3.29e-08	6.87e-07	8.58813
Tfec	-1.78683	0.0874335	-7.30598	3.29e-08	6.87e-07	8.86638
Cep55	-1.12953	2.75877	-7.30476	3.3e-08	6.88e-07	8.69826
Acsbg1	-0.987584	8.60592	-7.30287	3.32e-08	6.9e-07	8.30867
Stard5	-1.14632	4.55872	-7.29671	3.37e-08	7.01e-07	8.53635
Bnip3	1.99859	6.46238	7.29628	3.38e-08	7.01e-07	8.35104
Man1c1	-1.57896	6.13082	-7.29187	3.42e-08	7.08e-07	8.39812
Slc6a9	1.03732	5.80008	7.28816	3.45e-08	7.14e-07	8.35888
Lhx6	1.19112	5.15581	7.28565	3.48e-08	7.18e-07	8.41368
Myo1f	-2.29508	0.464141	-7.28442	3.49e-08	7.2e-07	8.80274
Pdxp	1.16655	6.0128	7.28308	3.5e-08	7.21e-07	8.30992
Ddr1	-1.0603	6.7681	-7.27568	3.57e-08	7.34e-07	8.2933
Tapbpl	-1.78615	2.55283	-7.27545	3.57e-08	7.34e-07	8.69087
Zc3hav1	-2.31189	1.56019	-7.27298	3.6e-08	7.38e-07	8.74518
Serping1	-2.62645	0.829404	-7.26711	3.66e-08	7.49e-07	8.7527
Syndig1l	1.41697	3.72551	7.26455	3.68e-08	7.53e-07	8.38896
Nfe2l2	-1.64624	5.69126	-7.25545	3.77e-08	7.69e-07	8.39583
Col8a2	-2.14633	0.696528	-7.2554	3.77e-08	7.69e-07	8.73226
Cd52	-3.18969	2.11517	-7.25523	3.78e-08	7.69e-07	8.70276
Eng	-2.39069	1.177	-7.25143	3.82e-08	7.76e-07	8.70968
Fgf11	1.07937	5.16845	7.24212	3.91e-08	7.95e-07	8.23928
Tead4	-2.54043	1.29686	-7.24107	3.93e-08	7.96e-07	8.68309
Spire2	0.99105	5.13978	7.23784	3.96e-08	8.02e-07	8.25306
Rps27l	-1.21659	6.63812	-7.23023	4.04e-08	8.18e-07	8.15945
Nell1	1.29337	4.37285	7.22946	4.05e-08	8.18e-07	8.33168
Tom1l1	-1.2495	5.3456	-7.22922	4.05e-08	8.18e-07	8.28065
Pnpla3	1.54972	2.46189	7.22569	4.09e-08	8.23e-07	8.51697
Pop1	-0.937653	4.80239	-7.22527	4.1e-08	8.23e-07	8.25623
Adap2	-2.02487	0.464234	-7.2252	4.1e-08	8.23e-07	8.65138
Mapk7	0.905555	5.65591	7.22361	4.12e-08	8.26e-07	8.16353
Cdca8	-1.20401	4.02182	-7.22076	4.15e-08	8.31e-07	8.34339
Pqlc3	-2.0922	2.83222	-7.21592	4.2e-08	8.41e-07	8.53697
Dio3os	-1.8542	-0.289915	-7.21507	4.21e-08	8.42e-07	8.62616
Laptm4a	-1.32039	9.23761	-7.21449	4.22e-08	8.42e-07	8.05764
Plin3	-1.79712	3.39439	-7.21186	4.25e-08	8.46e-07	8.43178
Cldn11	-2.07165	3.41513	-7.21152	4.25e-08	8.46e-07	8.38527
Igfbp5	-1.47092	9.68936	-7.20251	4.36e-08	8.66e-07	8.01505
Cnp	-1.42688	7.37783	-7.19572	4.44e-08	8.8e-07	8.03696
Gmnn	-1.26304	3.5281	-7.19529	4.45e-08	8.8e-07	8.3807
Tmem87b	-1.87747	0.721405	-7.19513	4.45e-08	8.8e-07	8.57136
Gpc5	1.47782	4.39361	7.19156	4.49e-08	8.88e-07	8.23428
Mpeg1	-2.16437	1.23646	-7.18801	4.54e-08	8.95e-07	8.50263
Crip1	-1.85945	0.504096	-7.18392	4.59e-08	9.04e-07	8.54011
Lrrc23	-2.29376	2.79023	-7.17791	4.66e-08	9.18e-07	8.49154
Hnmt	1.24023	4.24921	7.17716	4.67e-08	9.18e-07	8.23931
Cers2	-0.939245	6.69391	-7.17612	4.69e-08	9.2e-07	8.01468
Msi1	-1.12915	7.0954	-7.1741	4.71e-08	9.23e-07	7.98371
Synm	1.30328	5.03709	7.1728	4.73e-08	9.24e-07	8.06895
Syt17	2.07257	2.65187	7.17277	4.73e-08	9.24e-07	8.37796
Top2a	-1.29123	5.59378	-7.17188	4.74e-08	9.24e-07	8.05902
Il10ra	-2.43348	0.791155	-7.17182	4.74e-08	9.24e-07	8.49745
Fibcd1	1.68722	2.33823	7.16978	4.77e-08	9.27e-07	8.36947
Dnajb13	-2.85984	2.23785	-7.16922	4.78e-08	9.27e-07	8.48156
Larp6	1.09864	5.00235	7.16908	4.78e-08	9.27e-07	8.07205
F2r	-1.30101	4.45454	-7.16861	4.78e-08	9.27e-07	8.18361
Cdk2	-1.23771	4.73656	-7.16835	4.79e-08	9.27e-07	8.18094
Agap2	1.10691	8.2481	7.16521	4.83e-08	9.33e-07	7.92228
Stmn3	1.16956	9.67031	7.16487	4.83e-08	9.33e-07	7.90909
Pcdh17	0.903758	6.51318	7.16189	4.87e-08	9.4e-07	7.96215
Hmgcs1	1.06219	10.0636	7.15438	4.97e-08	9.58e-07	7.87099
Bicc1	-2.29982	2.69829	-7.14532	5.1e-08	9.8e-07	8.34543
Nexn	-1.69238	3.40643	-7.14256	5.14e-08	9.87e-07	8.27061
Nfe2l3	1.55449	2.64352	7.14172	5.15e-08	9.87e-07	8.26073
Slc25a22	1.18948	7.90703	7.14143	5.15e-08	9.87e-07	7.86237
Igfbp7	-2.30778	3.50119	-7.13948	5.18e-08	9.91e-07	8.29214
Col12a1	-2.93514	2.61707	-7.13878	5.19e-08	9.92e-07	8.35337
Chrm4	1.67127	2.22834	7.13719	5.21e-08	9.95e-07	8.33366
Cpne3	-1.38822	5.58286	-7.13399	5.26e-08	1e-06	8.02349
Snx5	-0.940113	6.75055	-7.13306	5.27e-08	1e-06	7.89665
Cdkl1	2.02874	2.4897	7.13012	5.32e-08	1.01e-06	8.26363
Parvg	-1.94843	0.538731	-7.12973	5.32e-08	1.01e-06	8.38988
Tcf7l1	-1.4292	4.88249	-7.12756	5.35e-08	1.01e-06	8.09684
Thra	0.840954	10.7474	7.12567	5.38e-08	1.02e-06	7.79256
Ostf1	-1.41612	4.67561	-7.12504	5.39e-08	1.02e-06	8.03458
Smtnl2	1.72488	3.16656	7.12217	5.43e-08	1.03e-06	8.08164
Cdc42ep2	0.991663	4.21781	7.12165	5.44e-08	1.03e-06	7.96676
Far2	1.81161	3.56449	7.12112	5.45e-08	1.03e-06	8.08919
Sorl1	-1.33394	6.53982	-7.11717	5.51e-08	1.04e-06	7.8478
A4galt	-2.02576	0.470207	-7.11204	5.59e-08	1.05e-06	8.34377
Iqgap3	-1.53811	3.50503	-7.11174	5.59e-08	1.05e-06	8.08763
Klhl6	-2.40294	0.427239	-7.10631	5.68e-08	1.06e-06	8.32698
Grm7	1.04461	5.84743	7.10465	5.7e-08	1.07e-06	7.81865
Galnt6	-2.05267	0.592917	-7.10009	5.77e-08	1.08e-06	8.28752
Hk2	1.39415	4.42786	7.0886	5.96e-08	1.11e-06	7.85183
Pxdc1	-1.36574	4.14394	-7.08768	5.97e-08	1.11e-06	8.06237
Col9a1	-1.88421	1.80664	-7.08187	6.07e-08	1.13e-06	8.16798
Col4a5	-1.91982	3.48438	-7.07859	6.12e-08	1.14e-06	8.10503
Hmgcr	0.967396	8.47693	7.07401	6.2e-08	1.15e-06	7.66483
Rab13	-1.4968	4.16254	-7.07162	6.24e-08	1.16e-06	8.00768
Gpc6	-1.15168	5.01757	-7.07104	6.25e-08	1.16e-06	7.80736
Matk	1.19584	5.26748	7.06809	6.3e-08	1.17e-06	7.74338
Adamts1	-1.38327	5.84873	-7.06698	6.32e-08	1.17e-06	7.79958
Gabpb2	-1.22662	3.17183	-7.06569	6.34e-08	1.17e-06	8.04211
Cxcl10	-2.3172	3.34372	-7.0644	6.37e-08	1.17e-06	8.18965
Grm3	1.50147	5.19824	7.06231	6.4e-08	1.18e-06	7.77388
Dact2	1.69512	4.05876	7.06129	6.42e-08	1.18e-06	7.85647
Pnkd	0.852425	6.68675	7.05937	6.46e-08	1.18e-06	7.67285
Antxr2	-1.76824	1.89632	-7.05916	6.46e-08	1.18e-06	8.15833
Arhgef10	-1.41584	5.43032	-7.05583	6.52e-08	1.19e-06	7.79885
Wdfy4	-2.1801	0.589013	-7.03404	6.92e-08	1.26e-06	8.11629
Fzd6	-1.78624	2.85228	-7.02839	7.03e-08	1.28e-06	8.01285
Pcsk2	1.49227	6.67922	7.0244	7.11e-08	1.3e-06	7.56959
Fchsd1	1.20193	3.90698	7.02252	7.14e-08	1.3e-06	7.75112
Adcy3	0.8926	5.97498	7.01745	7.25e-08	1.32e-06	7.59508
Snai1	-2.01479	0.654408	-7.01663	7.26e-08	1.32e-06	8.08707
Inafm1	1.15123	4.85018	7.01532	7.29e-08	1.32e-06	7.71847
Lpar4	-1.63545	3.30225	-7.01468	7.3e-08	1.32e-06	7.9719
Nuak1	-0.80776	6.5226	-7.01432	7.31e-08	1.32e-06	7.54977
Gcat	1.14957	3.69078	7.00506	7.5e-08	1.35e-06	7.72846
Akap5	1.01559	5.01439	7.00388	7.52e-08	1.36e-06	7.67606
Eci2	-0.860069	6.33348	-6.99899	7.62e-08	1.37e-06	7.56638
Cobll1	-2.20832	4.34876	-6.99757	7.65e-08	1.38e-06	7.86744
Dusp26	1.40686	5.89369	6.99018	7.81e-08	1.4e-06	7.50878
Fzd7	-1.76845	3.09889	-6.98815	7.85e-08	1.41e-06	7.88308
Vwa5a	-1.63544	5.28041	-6.98012	8.03e-08	1.44e-06	7.61149
Eda2r	-1.86548	4.32274	-6.97408	8.16e-08	1.46e-06	7.76864
Exoc3l4	-1.80769	0.696799	-6.9735	8.18e-08	1.46e-06	7.96794
Rcc2	-0.832245	7.05489	-6.96819	8.3e-08	1.48e-06	7.41106
Casp1	-1.96014	0.860741	-6.96712	8.32e-08	1.48e-06	7.93524
Ache	1.86702	3.68204	6.96687	8.33e-08	1.48e-06	7.69494
Grp	1.78303	3.21365	6.96663	8.33e-08	1.48e-06	7.69
Adm	1.72064	1.59344	6.96643	8.34e-08	1.48e-06	7.84627
Rit2	1.31686	5.10393	6.96556	8.36e-08	1.48e-06	7.53366
Sh3rf2	-1.9782	0.212804	-6.96226	8.44e-08	1.5e-06	7.93425
Plod1	-0.990681	6.06501	-6.96115	8.46e-08	1.5e-06	7.45862
Gsap	-1.42924	3.34883	-6.96113	8.46e-08	1.5e-06	7.76429
Lamc3	-1.91999	0.903208	-6.95929	8.5e-08	1.5e-06	7.84266
Gatm	0.989097	6.24852	6.95898	8.51e-08	1.5e-06	7.41776
Gm2061	1.62101	1.78166	6.95292	8.66e-08	1.53e-06	7.81814
Kcnk12	1.35976	3.25707	6.94561	8.83e-08	1.55e-06	7.61569
Parva	-1.25263	6.88308	-6.93703	9.04e-08	1.59e-06	7.3525
Cd63	-1.32421	8.55463	-6.93667	9.05e-08	1.59e-06	7.29651
Glb1l2	-1.89607	2.15668	-6.92875	9.25e-08	1.62e-06	7.78313
Lum	-1.91443	0.270702	-6.92746	9.29e-08	1.63e-06	7.81749
Slc39a3	0.974915	5.88825	6.92628	9.32e-08	1.63e-06	7.31999
Tcirg1	-2.17458	2.81385	-6.92297	9.4e-08	1.64e-06	7.70411
Rrm2	-0.983534	5.97895	-6.91691	9.56e-08	1.67e-06	7.31493
Gng11	-1.87415	1.58134	-6.91678	9.56e-08	1.67e-06	7.76941
Fn1	-1.87441	5.36419	-6.91446	9.63e-08	1.68e-06	7.38162
Ptgr1	-1.94971	2.54042	-6.91299	9.66e-08	1.68e-06	7.7452
Arhgap31	-1.40204	4.86647	-6.91118	9.71e-08	1.69e-06	7.45311
Tmem119	-1.8242	0.125015	-6.90318	9.93e-08	1.72e-06	7.78145
Ldlrap1	-2.30232	1.64556	-6.90185	9.97e-08	1.73e-06	7.73075
Ptprn	1.28289	7.05739	6.89927	1e-07	1.74e-06	7.23008
Gnaz	1.03365	7.88977	6.89581	1.01e-07	1.75e-06	7.18255
Pmvk	1.0168	6.52227	6.89532	1.01e-07	1.75e-06	7.22127
Cd47	1.05498	7.52056	6.89363	1.02e-07	1.76e-06	7.19405
2410004P03Rik	-1.94379	4.12051	-6.8842	1.05e-07	1.8e-06	7.54106
Serpinb6b	-2.2512	0.802997	-6.87887	1.06e-07	1.83e-06	7.71364
Nxph3	1.63155	4.28824	6.8773	1.07e-07	1.83e-06	7.28426
Cxcr4	-1.51771	5.79106	-6.87628	1.07e-07	1.84e-06	7.30376
Nnt	-1.05918	6.00431	-6.87129	1.08e-07	1.86e-06	7.23732
Rhbdf2	-2.15838	1.65357	-6.86907	1.09e-07	1.87e-06	7.6387
Tac1	2.22854	2.19026	6.86696	1.1e-07	1.88e-06	7.62886
Rfx2	-1.61638	3.54442	-6.86181	1.11e-07	1.9e-06	7.47739
Cadm3	1.03606	9.02649	6.86127	1.12e-07	1.9e-06	7.07385
Ramp3	1.86321	3.25373	6.85719	1.13e-07	1.92e-06	7.45311
Slc12a5	0.984091	7.15236	6.84946	1.15e-07	1.96e-06	7.063
Spdl1	-1.66266	1.81789	-6.84604	1.16e-07	1.98e-06	7.56775
Stxbp1	0.966322	10.2523	6.84118	1.18e-07	2e-06	7.00338
Spryd3	1.0038	7.22584	6.83966	1.18e-07	2.01e-06	7.04044
Iqcg	-1.48194	4.33057	-6.83928	1.19e-07	2.01e-06	7.34024
Ppp1r16a	0.8751	5.84739	6.83862	1.19e-07	2.01e-06	7.09897
Adrb2	-1.92783	0.44134	-6.83554	1.2e-07	2.02e-06	7.59054
Gm14230	-1.88057	3.29312	-6.83143	1.21e-07	2.04e-06	7.47168
Arhgap26	1.27208	5.33537	6.82248	1.24e-07	2.09e-06	7.12674
Caskin1	0.749705	7.40871	6.82223	1.24e-07	2.09e-06	6.99563
Ror1	-2.27575	1.6206	-6.81949	1.25e-07	2.11e-06	7.51014
Hn1l	-0.79018	6.17978	-6.81409	1.27e-07	2.13e-06	7.00972
Camk2n1	1.04936	8.1851	6.81192	1.28e-07	2.15e-06	6.94969
Zfp811	1.21165	4.23632	6.81083	1.28e-07	2.15e-06	7.18712
Tecr	1.01523	9.14955	6.80388	1.31e-07	2.19e-06	6.91119
Mvk	1.36577	4.7322	6.80034	1.32e-07	2.21e-06	7.02508
Gap43	1.21997	10.4751	6.79831	1.33e-07	2.22e-06	6.8816
Ncapd2	-0.879724	5.79152	-6.79813	1.33e-07	2.22e-06	6.98838
Cenpi	-1.42601	1.68973	-6.79132	1.35e-07	2.26e-06	7.41233
Enpep	-1.94965	-0.337342	-6.7907	1.36e-07	2.26e-06	7.47605
Tmem150c	1.08879	5.36991	6.78992	1.36e-07	2.26e-06	6.98127
C5ar1	-2.10132	0.186306	-6.78747	1.37e-07	2.27e-06	7.47104
Gpsm3	-2.0106	1.75238	-6.78291	1.39e-07	2.3e-06	7.37591
Aspm	-1.52033	3.59679	-6.77977	1.4e-07	2.32e-06	7.14931
Nacc2	-1.12465	7.4633	-6.77526	1.42e-07	2.34e-06	6.87298
Chd3os	1.07251	6.0474	6.77234	1.43e-07	2.36e-06	6.8985
Btg2	-1.13095	4.84728	-6.77091	1.43e-07	2.36e-06	7.10929
Slc22a8	-1.97095	0.472706	-6.76838	1.44e-07	2.38e-06	7.39889
Plch1	-1.42791	3.18874	-6.76743	1.45e-07	2.38e-06	7.22017
Tram2	-1.7839	3.30199	-6.76705	1.45e-07	2.38e-06	7.24955
Elavl3	0.842042	6.68605	6.76251	1.47e-07	2.41e-06	6.84466
Irgq	0.944725	7.03791	6.76227	1.47e-07	2.41e-06	6.82697
Unc5b	1.2584	3.43734	6.75618	1.49e-07	2.45e-06	7.09928
Gpld1	-1.66941	3.53097	-6.75404	1.5e-07	2.46e-06	7.23045
Tesk2	-1.83401	1.78672	-6.75113	1.51e-07	2.48e-06	7.31277
Npas4	-2.56057	2.95298	-6.74745	1.53e-07	2.5e-06	7.28974
E030003E18Rik	-2.10945	3.13676	-6.74492	1.54e-07	2.51e-06	7.23245
P2ry13	-1.85159	-0.00872833	-6.74128	1.56e-07	2.54e-06	7.34596
Lrp2	-3.09611	3.06254	-6.73623	1.58e-07	2.57e-06	7.25275
Vstm2a	1.01457	6.79818	6.73535	1.58e-07	2.57e-06	6.76395
Copz2	-1.708	3.85105	-6.73177	1.6e-07	2.6e-06	7.13719
Prps2	-0.966657	5.74045	-6.72717	1.62e-07	2.63e-06	6.81491
Slc9a6	0.791863	6.54872	6.72456	1.63e-07	2.64e-06	6.7386
Cyp39a1	-1.75691	3.52326	-6.72444	1.63e-07	2.64e-06	7.12429
Ddit4l	-1.96465	3.89681	-6.72335	1.64e-07	2.64e-06	7.13594
Mat2a	-0.994049	7.29551	-6.71675	1.67e-07	2.69e-06	6.7
Egr2	-2.16403	1.11515	-6.71625	1.67e-07	2.69e-06	7.26844
Twist1	-2.1757	0.506291	-6.7161	1.67e-07	2.69e-06	7.26121
Tenm2	1.43166	6.1802	6.71335	1.68e-07	2.71e-06	6.73827
Nfia	-1.01512	7.66561	-6.7094	1.7e-07	2.73e-06	6.68329
Ckap2l	-1.08441	4.32631	-6.70407	1.73e-07	2.77e-06	6.92593
Rorb	1.14263	5.875	6.70285	1.73e-07	2.78e-06	6.74521
Adrbk2	1.13458	5.13153	6.70105	1.74e-07	2.79e-06	6.77269
Cd72	-2.65502	1.70603	-6.70073	1.74e-07	2.79e-06	7.21271
Ydjc	1.48543	3.74599	6.70022	1.74e-07	2.79e-06	6.87247
Prrg3	1.37185	3.59769	6.70021	1.74e-07	2.79e-06	7.02797
E2f7	-1.72444	2.5132	-6.69836	1.75e-07	2.8e-06	7.0977
Serpine1	-2.65871	1.88225	-6.69657	1.76e-07	2.81e-06	7.17164
Prc1	-1.07236	4.82093	-6.69129	1.79e-07	2.85e-06	6.7968
Tmem130	1.10887	8.04308	6.68852	1.8e-07	2.87e-06	6.60469
Sncb	1.366	8.54776	6.68591	1.81e-07	2.88e-06	6.59116
Yipf2	-1.01583	4.44159	-6.68565	1.82e-07	2.88e-06	6.90723
Nlrp5-ps	1.46131	4.96239	6.68451	1.82e-07	2.89e-06	6.87916
Thbd	-2.04044	2.2169	-6.68265	1.83e-07	2.9e-06	7.05602
Ndufa4l2	2.5608	0.45985	6.68177	1.84e-07	2.9e-06	7.15342
Plxnb1	-1.09859	6.49256	-6.6776	1.86e-07	2.93e-06	6.62466
Hs3st4	1.51668	4.43122	6.67693	1.86e-07	2.94e-06	6.79706
Igsf1	-1.29381	4.27098	-6.67525	1.87e-07	2.95e-06	6.81411
Itgb5	-1.2863	6.84836	-6.66739	1.91e-07	3.01e-06	6.6083
Eef2kmt	-1.36932	3.44266	-6.66435	1.93e-07	3.03e-06	6.94749
Flrt2	1.39919	4.27668	6.66186	1.94e-07	3.05e-06	6.71693
Gfod2	0.829822	5.94159	6.65869	1.96e-07	3.07e-06	6.56033
Ube2c	-1.00777	5.6431	-6.6582	1.96e-07	3.07e-06	6.62258
Ndst1	-0.987893	6.66172	-6.65586	1.97e-07	3.09e-06	6.53497
Gm2694	1.8314	3.51467	6.65472	1.98e-07	3.09e-06	6.88082
Ankrd24	1.20948	2.31261	6.65464	1.98e-07	3.09e-06	6.98359
Setd7	-0.990111	7.43804	-6.65393	1.98e-07	3.09e-06	6.52678
Scn2b	1.34623	5.25703	6.65378	1.98e-07	3.09e-06	6.63836
Rims4	1.09368	6.06628	6.65271	1.99e-07	3.1e-06	6.56338
Rab33a	1.11964	6.53322	6.65172	2e-07	3.11e-06	6.5398
Rnf165	0.961622	6.32223	6.64946	2.01e-07	3.12e-06	6.54297
B4galnt4	0.817507	6.85593	6.64896	2.01e-07	3.12e-06	6.51849
Ap1ar	0.950428	6.01946	6.64829	2.02e-07	3.12e-06	6.56953
Spef2	-2.09191	1.84764	-6.6482	2.02e-07	3.12e-06	7.07588
Cdk5rap2	-1.39768	5.03489	-6.64746	2.02e-07	3.13e-06	6.65884
Kcnc2	1.58102	2.1643	6.6461	2.03e-07	3.13e-06	6.99813
Grin1	0.982382	7.45106	6.64014	2.06e-07	3.18e-06	6.48116
Dhx15	-0.955105	7.52697	-6.63862	2.07e-07	3.19e-06	6.48142
Rasgrf1	1.21276	4.91855	6.63406	2.1e-07	3.23e-06	6.60557
Gbp2	-2.41053	1.09435	-6.63342	2.1e-07	3.23e-06	7.04034
Smagp	-1.70981	0.00264725	-6.63309	2.1e-07	3.23e-06	7.05382
Creb3l2	-1.58591	4.49559	-6.63231	2.11e-07	3.24e-06	6.77089
Fbxo41	1.06139	6.07453	6.61289	2.22e-07	3.41e-06	6.44043
Etv4	1.31316	4.25784	6.6068	2.26e-07	3.47e-06	6.67852
Stk17b	-1.64712	3.39426	-6.60517	2.27e-07	3.48e-06	6.78308
Sgol2a	-1.09305	3.49604	-6.60097	2.3e-07	3.51e-06	6.71915
Cpt1a	-1.3334	6.26111	-6.60093	2.3e-07	3.51e-06	6.48597
Porcn	1.02242	5.57281	6.59681	2.33e-07	3.55e-06	6.45321
Clstn1	0.788952	9.9338	6.59554	2.34e-07	3.56e-06	6.31804
Tbc1d24	0.890068	5.37449	6.59429	2.34e-07	3.57e-06	6.42333
Chn2	-0.935136	6.56365	-6.59275	2.35e-07	3.58e-06	6.37324
Mt1	-1.49697	10.1346	-6.58791	2.39e-07	3.62e-06	6.3063
Homer3	-1.10064	4.35586	-6.58786	2.39e-07	3.62e-06	6.5819
Cd48	-1.70213	-0.0169816	-6.58446	2.41e-07	3.65e-06	6.92357
Tub	0.752874	6.09835	6.58254	2.42e-07	3.67e-06	6.35231
Dlx6	-1.07269	3.90771	-6.57429	2.48e-07	3.75e-06	6.60346
Abcc4	-1.49741	4.31598	-6.5708	2.5e-07	3.78e-06	6.60071
Utrn	-2.23083	3.62701	-6.56943	2.51e-07	3.79e-06	6.73852
Tnfrsf1a	-1.18747	5.10079	-6.56336	2.55e-07	3.85e-06	6.45766
Arvcf	-0.815539	6.61112	-6.55829	2.59e-07	3.91e-06	6.282
Mfsd1	-0.938711	6.19625	-6.55749	2.6e-07	3.91e-06	6.3476
Mrc2	-1.41981	3.69311	-6.55737	2.6e-07	3.91e-06	6.59844
Lrrn3	0.845683	6.58972	6.55552	2.61e-07	3.92e-06	6.26986
Gclc	-1.03703	6.701	-6.55115	2.64e-07	3.97e-06	6.29938
Dapp1	-1.51035	3.7068	-6.55018	2.65e-07	3.97e-06	6.60553
Nde1	-1.60097	5.48553	-6.54565	2.68e-07	4.02e-06	6.37021
BE949265	1.4494	-0.487662	6.54483	2.69e-07	4.03e-06	6.81966
Gss	-1.16237	4.21533	-6.53635	2.76e-07	4.12e-06	6.47336
Adam15	0.726262	6.42282	6.53621	2.76e-07	4.12e-06	6.23763
Kirrel	-1.81366	4.49617	-6.53437	2.77e-07	4.13e-06	6.4593
Loxl1	-1.2847	3.22146	-6.53146	2.79e-07	4.16e-06	6.55006
Eno2	1.29267	7.17063	6.52907	2.81e-07	4.18e-06	6.18351
Snap25	1.06753	8.85293	6.52885	2.81e-07	4.18e-06	6.14838
Slc14a2	-1.42277	1.6835	-6.52649	2.83e-07	4.21e-06	6.64805
Gm10130	-1.3709	1.85393	-6.52477	2.85e-07	4.22e-06	6.64612
Crispld1	-1.80045	0.58317	-6.52395	2.85e-07	4.23e-06	6.6986
Borcs6	0.923762	5.41168	6.5229	2.86e-07	4.24e-06	6.28397
Renbp	-1.61052	3.10839	-6.52255	2.86e-07	4.24e-06	6.60253
Slc7a4	0.953144	5.0979	6.52071	2.88e-07	4.25e-06	6.26659
Wisp1	-1.93127	1.41344	-6.52068	2.88e-07	4.25e-06	6.65045
Asb10	-1.62671	-0.371887	-6.52016	2.88e-07	4.25e-06	6.7487
Sdcbp	-0.76689	8.1973	-6.51991	2.89e-07	4.25e-06	6.14073
Dnmbp	-1.24331	4.72508	-6.5196	2.89e-07	4.25e-06	6.36516
Szrd1	-1.02289	5.42106	-6.51809	2.9e-07	4.26e-06	6.23945
Cox6b2	-1.87451	4.28214	-6.51651	2.91e-07	4.28e-06	6.48424
Avpr1a	1.05904	3.38949	6.51458	2.93e-07	4.3e-06	6.34638
Zfp568	-1.95769	2.00406	-6.51317	2.94e-07	4.31e-06	6.63759
Cdh7	1.47225	2.24953	6.51235	2.95e-07	4.31e-06	6.57623
Acox2	-1.89322	0.777757	-6.50727	2.99e-07	4.37e-06	6.70404
Smc4	-1.0494	5.10577	-6.50459	3.01e-07	4.4e-06	6.26719
Sptbn4	1.03513	3.85719	6.50289	3.03e-07	4.41e-06	6.34567
Tppp	1.06434	6.4867	6.50283	3.03e-07	4.41e-06	6.12132
Cbln1	1.49564	5.12431	6.49807	3.07e-07	4.47e-06	6.17178
Jph4	0.95734	8.22525	6.49382	3.1e-07	4.52e-06	6.04704
Mapkapk3	-1.5143	3.03466	-6.4891	3.15e-07	4.57e-06	6.54198
Hspg2	-3.15268	3.89632	-6.48884	3.15e-07	4.57e-06	6.44496
Prrx2	-1.923	1.12049	-6.48523	3.18e-07	4.61e-06	6.59461
Rhof	1.01964	5.65176	6.48196	3.21e-07	4.65e-06	6.10168
Pctp	-1.76293	0.761045	-6.48051	3.22e-07	4.66e-06	6.60869
Arl10	0.861617	7.17442	6.47444	3.28e-07	4.74e-06	6.02592
Chrna4	1.0752	5.69332	6.47349	3.29e-07	4.75e-06	6.08684
Nfam1	-1.91691	0.255081	-6.47297	3.29e-07	4.75e-06	6.60095
Prrt4	1.12901	3.86553	6.47288	3.29e-07	4.75e-06	6.23341
Mc5r	-1.59892	0.69167	-6.47116	3.31e-07	4.76e-06	6.56432
Ggt7	0.97747	5.94617	6.47023	3.32e-07	4.77e-06	6.05471
Pld6	1.58005	1.95983	6.46239	3.39e-07	4.87e-06	6.52076
Sdc4	-1.20374	7.00626	-6.45883	3.42e-07	4.92e-06	6.02251
Itga7	-1.4762	2.91571	-6.45733	3.44e-07	4.93e-06	6.38225
Gpr176	1.4042	2.72301	6.45663	3.45e-07	4.94e-06	6.33035
Zfp24	-0.812663	6.61684	-6.45626	3.45e-07	4.94e-06	5.98867
2810417H13Rik	-0.951897	5.33604	-6.45527	3.46e-07	4.94e-06	6.04429
Nek7	-0.975673	5.10381	-6.45524	3.46e-07	4.94e-06	6.17076
Tln1	-1.74332	5.0272	-6.45353	3.48e-07	4.96e-06	6.1482
Gpr85	1.65624	5.21449	6.45209	3.49e-07	4.98e-06	6.04282
Deaf1	0.771608	7.98069	6.44959	3.51e-07	5.01e-06	5.93254
Armc3	-1.95408	1.96179	-6.44633	3.55e-07	5.05e-06	6.50589
Arhgap11a	-0.94334	4.99626	-6.44508	3.56e-07	5.06e-06	6.09969
Cnrip1	1.12298	7.15818	6.44395	3.57e-07	5.07e-06	5.93449
Swap70	-1.1846	4.37638	-6.44056	3.6e-07	5.11e-06	6.14792
Uchl1	1.03669	10.1741	6.43335	3.68e-07	5.21e-06	5.86159
Hs3st5	1.25781	3.13841	6.43071	3.71e-07	5.25e-06	6.20716
Rin3	-1.69313	1.56772	-6.42686	3.75e-07	5.3e-06	6.40733
Slc35d1	-1.09355	4.37451	-6.42384	3.78e-07	5.34e-06	6.16982
Csdc2	0.695757	8.43282	6.41545	3.87e-07	5.46e-06	5.83102
Cav1	1.07058	4.046	6.41306	3.89e-07	5.49e-06	5.97802
Slc7a10	1.60196	2.36874	6.41295	3.89e-07	5.49e-06	6.31249
Actg2	-1.88801	0.544864	-6.4074	3.96e-07	5.57e-06	6.39393
Notch2	-2.00488	6.26535	-6.40514	3.98e-07	5.6e-06	5.93407
Nov	1.40701	7.5427	6.40459	3.99e-07	5.6e-06	5.80728
Lin7b	1.0631	4.98844	6.40168	4.02e-07	5.64e-06	5.90818
Ifih1	-1.96984	1.50121	-6.39943	4.05e-07	5.67e-06	6.3794
Dmwd	0.823688	5.79647	6.395	4.1e-07	5.74e-06	5.87786
Ly6e	1.12977	6.74234	6.39474	4.1e-07	5.74e-06	5.82046
Naaa	-1.52344	5.48975	-6.38887	4.17e-07	5.83e-06	5.97689
Cntn5	1.24994	3.58987	6.38344	4.23e-07	5.91e-06	6.00825
Ptprc	-2.09926	0.60115	-6.38121	4.26e-07	5.94e-06	6.34385
Cyp4f16	-1.6725	2.97527	-6.37869	4.29e-07	5.98e-06	6.17229
Actn1	-0.971668	6.85119	-6.37596	4.32e-07	6.02e-06	5.76157
Ucma	-2.15193	1.60259	-6.37408	4.34e-07	6.05e-06	6.33104
Sst	1.28569	8.95605	6.37351	4.35e-07	6.05e-06	5.7088
Itga5	-1.79541	2.61923	-6.37246	4.36e-07	6.06e-06	6.18183
Cldn20	-1.84016	0.177951	-6.36998	4.39e-07	6.09e-06	6.32544
Faim2	1.10281	6.77557	6.36959	4.4e-07	6.09e-06	5.74006
Ezh2	-1.10277	4.0809	-6.36946	4.4e-07	6.09e-06	6.0091
Gja1	-1.1438	9.15645	-6.36919	4.4e-07	6.09e-06	5.69968
Rbmx	-0.765442	7.64428	-6.36724	4.43e-07	6.12e-06	5.70954
Tgif1	-1.8791	4.36902	-6.36705	4.43e-07	6.12e-06	6.07224
Sox21	-0.93738	7.10082	-6.36598	4.44e-07	6.13e-06	5.76008
Pcdh9	0.896491	5.91507	6.36065	4.51e-07	6.22e-06	5.76886
Gpam	-0.714723	7.67308	-6.35928	4.53e-07	6.24e-06	5.68622
Amotl1	-0.966913	5.62196	-6.35832	4.54e-07	6.25e-06	5.76551
Kcnmb2	1.35338	2.22592	6.35654	4.56e-07	6.27e-06	6.14497
Galntl6	1.33322	3.89785	6.35616	4.57e-07	6.27e-06	5.95206
Sfxn3	0.890896	7.38854	6.35564	4.58e-07	6.28e-06	5.67744
Rac2	-2.29146	0.863797	-6.35514	4.58e-07	6.28e-06	6.26777
Txndc5	-0.89541	7.01336	-6.35449	4.59e-07	6.28e-06	5.73383
St3gal6	-1.19039	3.64671	-6.3532	4.61e-07	6.3e-06	6.07925
Phactr2	-1.46388	3.7212	-6.35304	4.61e-07	6.3e-06	6.07914
Tmem63c	1.37002	4.69136	6.34859	4.67e-07	6.37e-06	5.82618
Syt13	1.23242	4.53232	6.34447	4.72e-07	6.44e-06	5.82942
Rnf157	0.832485	6.52854	6.34162	4.76e-07	6.49e-06	5.66148
Snph	0.895815	6.05639	6.33962	4.79e-07	6.52e-06	5.69155
Nectin3	-1.00232	5.83487	-6.33869	4.8e-07	6.53e-06	5.69293
Scn3b	0.99329	6.66341	6.33509	4.85e-07	6.58e-06	5.62495
Phactr1	0.94083	7.98143	6.33508	4.85e-07	6.58e-06	5.61235
Sh3yl1	1.05213	5.38614	6.33332	4.87e-07	6.61e-06	5.71279
Iglon5	0.772841	6.71744	6.3306	4.91e-07	6.65e-06	5.62907
Pde2a	1.10707	8.05563	6.32906	4.93e-07	6.67e-06	5.58878
Cdkn2d	0.994983	6.7282	6.32694	4.96e-07	6.71e-06	5.62362
Flna	-1.31674	7.562	-6.32603	4.97e-07	6.72e-06	5.60077
Map6	0.923826	8.54858	6.32418	5e-07	6.75e-06	5.56861
Phyhip	1.19607	6.49894	6.31607	5.11e-07	6.9e-06	5.58934
Galc	-1.03809	5.33477	-6.31262	5.16e-07	6.96e-06	5.72132
Osgin1	-2.05938	2.68782	-6.31105	5.19e-07	6.98e-06	6.11316
Fcgr4	-1.75801	0.0306099	-6.31013	5.2e-07	6.99e-06	6.16077
Sgsm2	0.736966	6.51017	6.30912	5.22e-07	7.01e-06	5.56572
Gng2	0.905267	9.7654	6.30835	5.23e-07	7.02e-06	5.51069
Rasl12	1.54919	1.23296	6.30704	5.25e-07	7.04e-06	6.0901
Nos1	1.06682	5.22579	6.30408	5.29e-07	7.09e-06	5.64471
Ero1l	1.25319	5.53962	6.30113	5.33e-07	7.14e-06	5.62923
Dlgap5	-1.52408	2.71499	-6.29741	5.39e-07	7.21e-06	5.92634
Rbm47	-2.20797	0.735337	-6.29559	5.42e-07	7.24e-06	6.10971
Trpc5	1.47924	3.38945	6.29413	5.44e-07	7.26e-06	5.73091
Stxbp4	-1.19879	4.41251	-6.28975	5.51e-07	7.35e-06	5.77426
Apobec1	-1.69507	2.04759	-6.27424	5.75e-07	7.67e-06	5.98397
Lamb2	-1.44762	5.9007	-6.27186	5.79e-07	7.71e-06	5.55549
Sarm1	0.791805	6.17799	6.27158	5.8e-07	7.71e-06	5.47609
Jakmip1	0.949401	6.30241	6.27071	5.81e-07	7.72e-06	5.48804
Nrn1	1.31555	5.25421	6.26966	5.83e-07	7.74e-06	5.56383
Ace2	-1.58624	-0.132566	-6.26648	5.88e-07	7.8e-06	6.05093
Cdkn2c	-1.06861	4.47703	-6.26468	5.91e-07	7.83e-06	5.68457
Rgs14	1.45339	2.3749	6.26343	5.93e-07	7.85e-06	5.87011
Iqgap2	-1.84639	4.606	-6.26328	5.94e-07	7.85e-06	5.75774
Sntg1	1.00553	3.96733	6.26084	5.98e-07	7.9e-06	5.69381
Rhoc	-1.27726	4.91447	-6.25223	6.12e-07	8.07e-06	5.59465
Csrnp3	0.811119	6.64361	6.2522	6.12e-07	8.07e-06	5.41089
Shank3	0.851664	6.43478	6.25219	6.12e-07	8.07e-06	5.40467
Tanc1	-1.47937	3.70061	-6.24793	6.2e-07	8.16e-06	5.70902
Lingo1	1.2595	3.78896	6.24476	6.25e-07	8.22e-06	5.57322
Cds1	0.967106	5.39338	6.24418	6.26e-07	8.23e-06	5.48035
Cstb	-0.986886	6.18905	-6.24222	6.3e-07	8.27e-06	5.4336
Nrgn	1.66323	8.09751	6.24118	6.32e-07	8.29e-06	5.33212
Grm1	1.30819	4.13162	6.23074	6.51e-07	8.53e-06	5.57853
2810459M11Rik	-1.2652	5.10462	-6.22905	6.54e-07	8.56e-06	5.43965
Dhfr	-0.881537	4.29859	-6.22649	6.58e-07	8.61e-06	5.55731
Ccdc85a	0.791759	6.1903	6.21998	6.71e-07	8.76e-06	5.34359
Psat1	-0.745237	7.81637	-6.2183	6.74e-07	8.8e-06	5.28977
Mapk3	0.775822	8.42515	6.21753	6.75e-07	8.81e-06	5.27226
Ldb2	1.19656	7.14809	6.21587	6.78e-07	8.84e-06	5.28424
Tbx21	1.99545	-0.0996668	6.21528	6.8e-07	8.85e-06	5.90594
Sh2d5	1.43739	3.42463	6.21085	6.88e-07	8.95e-06	5.55573
Igsf11	-0.971271	6.6945	-6.21005	6.9e-07	8.96e-06	5.31182
Fads3	0.875228	5.29279	6.20942	6.91e-07	8.97e-06	5.34766
Plekha7	-1.10198	4.06464	-6.20831	6.93e-07	8.99e-06	5.56911
Rab40c	0.702883	6.84121	6.20585	6.98e-07	9.05e-06	5.27507
Pcdh11x	1.0128	5.47231	6.20545	6.99e-07	9.05e-06	5.32645
Stmn2	1.20812	11.1613	6.20352	7.03e-07	9.09e-06	5.2008
Tbc1d31	-1.56855	3.00672	-6.20298	7.04e-07	9.1e-06	5.72161
Me3	1.0678	3.52934	6.20108	7.07e-07	9.14e-06	5.57488
Avpi1	1.05239	3.7152	6.2002	7.09e-07	9.15e-06	5.50803
Erbb2ip	-1.42418	6.1925	-6.1966	7.16e-07	9.24e-06	5.33633
Hmmr	-1.53456	3.36565	-6.19439	7.21e-07	9.29e-06	5.61762
Glipr2	-0.909204	4.84935	-6.19391	7.22e-07	9.29e-06	5.37916
Lrrc24	1.20036	4.93742	6.19268	7.24e-07	9.31e-06	5.38074
Trpv2	1.32782	3.47902	6.19151	7.27e-07	9.34e-06	5.49354
Spata6	-1.47674	4.08522	-6.18772	7.35e-07	9.43e-06	5.62701
Fut10	-1.4199	4.34744	-6.18699	7.36e-07	9.44e-06	5.45074
Cd200r4	-1.73426	0.013406	-6.1803	7.5e-07	9.61e-06	5.80439
Rac3	1.21151	7.27536	6.17903	7.53e-07	9.64e-06	5.18316
Pdcd6ip	-0.994041	6.66718	-6.17656	7.58e-07	9.7e-06	5.20271
Aldh1b1	1.21237	3.50132	6.17313	7.66e-07	9.78e-06	5.41897
Slco3a1	0.990865	5.64245	6.17054	7.71e-07	9.85e-06	5.20793
Pros1	-1.71925	2.66823	-6.16896	7.75e-07	9.88e-06	5.63949
Fam131c	1.47176	3.95664	6.16784	7.77e-07	9.9e-06	5.37153
Col5a1	-1.13979	4.3215	-6.16741	7.78e-07	9.91e-06	5.41332
Car11	1.05082	6.41302	6.16527	7.83e-07	9.96e-06	5.17592
Pak3	0.769095	6.61755	6.16397	7.86e-07	9.99e-06	5.16561
Slc2a9	-1.83668	0.910895	-6.1625	7.89e-07	1e-05	5.74655
Wnt5b	-1.53469	2.43959	-6.16093	7.92e-07	1.01e-05	5.63132
Itga11	-1.71928	1.01375	-6.16057	7.93e-07	1.01e-05	5.71053
Palm	0.928487	7.85075	6.15689	8.02e-07	1.02e-05	5.11057
Irak4	-1.52785	1.79181	-6.15658	8.02e-07	1.02e-05	5.68066
Flnb	-1.54108	5.58517	-6.15358	8.09e-07	1.02e-05	5.26647
Dnajc6	1.12303	7.44465	6.15244	8.12e-07	1.03e-05	5.1071
Ablim2	1.03171	4.88747	6.14583	8.27e-07	1.04e-05	5.19452
Rab3a	1.0097	7.76324	6.14556	8.28e-07	1.04e-05	5.08038
Ranbp3l	-1.7597	0.688805	-6.14543	8.28e-07	1.04e-05	5.67719
Bdh2	-2.48551	2.94386	-6.14488	8.29e-07	1.04e-05	5.62004
Agt	1.53595	2.9286	6.14396	8.31e-07	1.05e-05	5.43876
Rnft1	-1.0931	4.01075	-6.14198	8.36e-07	1.05e-05	5.39091
Mlip	1.47227	3.63413	6.13698	8.48e-07	1.06e-05	5.39126
L1cam	1.05013	7.65821	6.13301	8.58e-07	1.08e-05	5.03782
Pla2g16	-1.42632	4.2776	-6.13262	8.59e-07	1.08e-05	5.42378
Hexa	-0.876069	5.89592	-6.13065	8.63e-07	1.08e-05	5.15618
Cdca5	-1.28279	3.11214	-6.13062	8.63e-07	1.08e-05	5.40791
Crym	1.94271	4.87943	6.12838	8.69e-07	1.09e-05	5.18616
Tspo	-2.08626	1.89961	-6.12412	8.79e-07	1.1e-05	5.59376
Hif3a	1.46237	1.24794	6.11504	9.02e-07	1.13e-05	5.52486
Cdh26	-1.60625	0.725611	-6.11391	9.05e-07	1.13e-05	5.62606
Aif1	-1.88606	1.79793	-6.11367	9.06e-07	1.13e-05	5.5452
Abi2	0.790481	8.26345	6.11227	9.09e-07	1.13e-05	4.97691
Siglec1	-2.0536	0.123797	-6.11101	9.13e-07	1.13e-05	5.61057
Erc2	0.782331	7.58239	6.11087	9.13e-07	1.13e-05	4.97872
Lrrc4	0.708673	6.42925	6.11044	9.14e-07	1.13e-05	5.03226
Evc	-1.3515	3.61898	-6.10359	9.32e-07	1.16e-05	5.29989
Clvs1	1.03248	5.96992	6.10323	9.33e-07	1.16e-05	5.03696
Gng3	1.20523	8.26655	6.10042	9.4e-07	1.16e-05	4.94153
Ppp2r2c	1.00262	7.99544	6.09614	9.52e-07	1.18e-05	4.93801
Tgfbr3	-1.48852	2.00351	-6.09215	9.63e-07	1.19e-05	5.45755
Pgrmc1	0.757294	9.07404	6.09114	9.65e-07	1.19e-05	4.90569
Sync	-1.81846	1.59239	-6.09019	9.68e-07	1.19e-05	5.5284
Snap47	0.783177	8.28652	6.09013	9.68e-07	1.19e-05	4.90903
Pcyt2	1.00094	5.52106	6.08664	9.78e-07	1.2e-05	5.00417
Lrrc3	0.902501	5.10501	6.08549	9.81e-07	1.21e-05	4.97914
Hnrnpf	-0.623313	7.95611	-6.08176	9.92e-07	1.22e-05	4.90131
Arhgef5	-1.57495	0.358944	-6.08139	9.93e-07	1.22e-05	5.53323
Slc9a3r2	1.07973	4.6452	6.08126	9.93e-07	1.22e-05	5.11307
Tubg2	1.03295	4.57359	6.08111	9.93e-07	1.22e-05	5.05224
Chst1	1.0153	5.75796	6.08039	9.95e-07	1.22e-05	4.94914
Atp2b3	0.957136	5.67457	6.077	1e-06	1.23e-05	4.96947
Rpl7l1	-0.662671	6.29912	-6.07367	1.01e-06	1.24e-05	4.91823
Atat1	0.62266	6.58979	6.07349	1.02e-06	1.24e-05	4.90602
Rgs7	0.86654	6.96624	6.07313	1.02e-06	1.24e-05	4.89965
Fkbp1b	1.3218	5.43294	6.0707	1.02e-06	1.25e-05	4.9546
Hmg20b	-0.819364	5.21367	-6.07055	1.02e-06	1.25e-05	5.04149
H60b	-1.84218	1.41938	-6.07054	1.02e-06	1.25e-05	5.45065
Slc35g1	-1.57069	1.55805	-6.06812	1.03e-06	1.25e-05	5.39867
F5	-1.65502	-0.185745	-6.06678	1.03e-06	1.26e-05	5.49651
Ncam1	0.806381	10.629	6.06171	1.05e-06	1.28e-05	4.80297
Cadm1	0.6787	9.14076	6.06065	1.05e-06	1.28e-05	4.81852
Pcx	-0.908346	5.84529	-6.05562	1.07e-06	1.3e-05	4.89394
Smpd2	-0.849685	4.63896	-6.05161	1.08e-06	1.31e-05	5.04499
Syde1	-1.40904	3.33085	-6.04892	1.09e-06	1.32e-05	5.26883
Camkv	0.947125	7.87546	6.04465	1.1e-06	1.33e-05	4.7821
F630040K05Rik	1.98629	0.477722	6.04383	1.1e-06	1.33e-05	5.3777
Gls	0.805994	7.38521	6.04068	1.11e-06	1.35e-05	4.78647
Slco1a5	-2.21241	0.944202	-6.03811	1.12e-06	1.35e-05	5.4045
Fa2h	-1.33889	2.69694	-6.03717	1.13e-06	1.36e-05	5.23289
Lpar6	-1.78313	2.86092	-6.03695	1.13e-06	1.36e-05	5.25617
1810011H11Rik	-1.78286	0.0758872	-6.03686	1.13e-06	1.36e-05	5.40467
Mybl1	-1.28046	5.04728	-6.03509	1.13e-06	1.36e-05	4.96202
Tifa	-1.55388	3.78158	-6.03021	1.15e-06	1.38e-05	5.13698
Dio2	1.17723	3.41491	6.03006	1.15e-06	1.38e-05	5.08826
Cds2	0.554121	8.62094	6.02805	1.15e-06	1.38e-05	4.72863
Igf1	-1.73015	4.3044	-6.02795	1.15e-06	1.38e-05	5.02505
C1qc	-1.72873	0.441941	-6.02651	1.16e-06	1.39e-05	5.37819
Slc7a7	-1.72924	1.56845	-6.02581	1.16e-06	1.39e-05	5.30708
L3mbtl1	1.03796	3.6752	6.02499	1.16e-06	1.39e-05	5.02621
Lpcat4	0.98346	4.56305	6.02163	1.18e-06	1.4e-05	4.88806
Mtap	-1.07598	5.50328	-6.02046	1.18e-06	1.41e-05	4.88329
Dhcr24	0.964304	5.72194	6.01995	1.18e-06	1.41e-05	4.76411
Cr2	1.50739	0.878943	6.01727	1.19e-06	1.42e-05	5.30064
Sh3rf1	0.719158	5.85578	6.01686	1.19e-06	1.42e-05	4.7786
9630013A20Rik	-1.73646	2.44584	-6.01569	1.2e-06	1.42e-05	5.24657
Tbc1d22b	0.707868	6.51077	6.01559	1.2e-06	1.42e-05	4.74102
Npvf	-2.00997	1.80365	-6.01207	1.21e-06	1.44e-05	5.33436
Arhgef28	1.10545	4.3267	6.00946	1.22e-06	1.44e-05	4.89392
Ccdc170	-1.87967	1.50222	-6.00788	1.22e-06	1.45e-05	5.30327
Zwilch	-1.43498	1.96258	-6.00757	1.22e-06	1.45e-05	5.22723
Stx1b	0.875932	8.07627	6.00541	1.23e-06	1.46e-05	4.67308
Chd5	0.742337	7.51119	6.00438	1.23e-06	1.46e-05	4.67888
Sulf1	-1.26888	2.83019	-6.00338	1.24e-06	1.46e-05	5.04937
Plpp2	1.35409	2.49975	6.00158	1.24e-06	1.47e-05	5.1473
Pon2	-0.974132	5.87189	-5.99812	1.26e-06	1.48e-05	4.83243
Snx33	-1.8192	3.04449	-5.99756	1.26e-06	1.48e-05	5.14951
3110035E14Rik	1.16047	5.6295	5.99628	1.26e-06	1.49e-05	4.74719
Tmem179	1.05063	5.87542	5.99616	1.26e-06	1.49e-05	4.71766
Hadh	-0.991892	6.28174	-5.99604	1.26e-06	1.49e-05	4.74341
Bmf	-1.40925	1.70405	-5.99599	1.26e-06	1.49e-05	5.16144
Mns1	-2.04149	2.75811	-5.99555	1.27e-06	1.49e-05	5.19984
Clic1	-1.31067	5.5371	-5.99205	1.28e-06	1.5e-05	4.81872
Sdc3	0.882259	9.07524	5.99079	1.28e-06	1.5e-05	4.61443
Optc	1.76446	1.54214	5.9894	1.29e-06	1.51e-05	5.21007
Yap1	-0.987401	5.65883	-5.98793	1.29e-06	1.51e-05	4.81631
Letmd1	0.709027	6.02727	5.9878	1.29e-06	1.51e-05	4.68509
Dlec1	-1.87783	2.0368	-5.98551	1.3e-06	1.52e-05	5.23209
Plekhg1	-1.32683	4.76633	-5.98501	1.3e-06	1.52e-05	4.86102
Fam189b	0.882161	4.93727	5.98269	1.31e-06	1.53e-05	4.75333
Apobec3	-1.56739	2.31961	-5.98197	1.32e-06	1.53e-05	5.14398
Kif19a	-1.63958	1.40938	-5.98006	1.32e-06	1.54e-05	5.19826
Myb	-1.49621	3.12964	-5.97978	1.32e-06	1.54e-05	5.11378
Arrdc2	1.02832	2.6929	5.97945	1.33e-06	1.54e-05	4.97949
Gpr6	1.73243	1.57053	5.9769	1.33e-06	1.55e-05	5.11771
Syk	-2.05192	0.568406	-5.97117	1.36e-06	1.58e-05	5.20025
Ddit4	1.2029	7.4579	5.96991	1.36e-06	1.58e-05	4.56964
Itgb1	-0.79908	7.83027	-5.96935	1.36e-06	1.58e-05	4.59325
Micall1	0.621633	6.50448	5.96876	1.37e-06	1.58e-05	4.60094
Parp14	-1.81523	0.796623	-5.96823	1.37e-06	1.58e-05	5.21288
Hdac11	0.878699	5.50834	5.96404	1.38e-06	1.6e-05	4.66956
Mcm6	-1.14041	5.67195	-5.95463	1.42e-06	1.64e-05	4.63854
Grik5	0.669517	6.8531	5.95411	1.42e-06	1.64e-05	4.56125
Slc22a17	0.650745	9.53456	5.95322	1.43e-06	1.65e-05	4.50964
Tmem144	-1.697	0.928793	-5.95242	1.43e-06	1.65e-05	5.14788
Rec8	-1.76056	0.748815	-5.95215	1.43e-06	1.65e-05	5.1332
Snca	1.57502	8.48336	5.95014	1.44e-06	1.66e-05	4.50879
Snn	0.641498	7.95344	5.95006	1.44e-06	1.66e-05	4.51181
Olfml2a	-2.00116	2.0731	-5.9494	1.44e-06	1.66e-05	5.08119
Wfs1	0.886203	5.76782	5.94886	1.45e-06	1.66e-05	4.62046
Ptpn7	-1.55984	-0.292288	-5.9487	1.45e-06	1.66e-05	5.16784
Adamts5	-1.13491	2.84364	-5.94747	1.45e-06	1.66e-05	4.94306
Efemp1	-2.23147	2.98094	-5.9423	1.47e-06	1.69e-05	5.02337
Plekhd1	1.91697	1.0558	5.94038	1.48e-06	1.69e-05	5.07199
Nek2	-1.3873	3.29195	-5.93942	1.48e-06	1.7e-05	4.82953
Pik3cd	0.95887	4.33023	5.93922	1.49e-06	1.7e-05	4.6914
Tmem246	0.836818	6.30909	5.93765	1.49e-06	1.7e-05	4.53403
Pax6	-1.2126	5.30538	-5.93757	1.49e-06	1.7e-05	4.71465
Col6a1	-1.13511	4.44078	-5.93627	1.5e-06	1.71e-05	4.70875
Arhgdib	-1.09797	4.67267	-5.93453	1.51e-06	1.71e-05	4.68497
Jag1	-1.0811	3.99678	-5.92893	1.53e-06	1.74e-05	4.78786
Rhod	-1.70602	2.00852	-5.92819	1.53e-06	1.74e-05	5.05432
Ccdc190	-1.27654	5.24444	-5.9262	1.54e-06	1.75e-05	4.65895
Camk1g	0.898677	6.1217	5.92183	1.56e-06	1.77e-05	4.49325
Akt3	0.77803	7.23739	5.92027	1.57e-06	1.78e-05	4.45478
Pgbd5	0.923659	6.5054	5.92016	1.57e-06	1.78e-05	4.46872
Dctn1	0.918714	6.88037	5.91893	1.57e-06	1.78e-05	4.46348
Frs3	1.08334	3.29545	5.91152	1.61e-06	1.82e-05	4.80064
Slc16a2	0.906725	7.68581	5.90843	1.62e-06	1.83e-05	4.39963
Irf1	-1.91448	3.5841	-5.90729	1.63e-06	1.84e-05	4.86848
Acot11	-1.15651	4.98285	-5.90511	1.64e-06	1.85e-05	4.62082
Enpp6	-1.49685	4.77157	-5.9019	1.65e-06	1.86e-05	4.57205
Hey1	-0.742151	5.86283	-5.89987	1.66e-06	1.87e-05	4.45962
Ntng1	0.90558	4.19128	5.89771	1.67e-06	1.88e-05	4.63143
Sh3bgrl	-0.727479	7.78018	-5.8964	1.68e-06	1.89e-05	4.37219
C2	-1.49047	-0.396725	-5.89622	1.68e-06	1.89e-05	5.02277
Myh9	-1.36459	5.91128	-5.89604	1.68e-06	1.89e-05	4.43703
Kdelc2	-1.09275	3.46765	-5.89502	1.68e-06	1.89e-05	4.76365
Rtn4rl2	1.1436	5.0098	5.89418	1.69e-06	1.89e-05	4.48866
Gfap	-1.95555	3.8567	-5.89137	1.7e-06	1.91e-05	4.65246
Cks1b	-0.702538	5.59462	-5.88965	1.71e-06	1.92e-05	4.4827
Jade2	-1.04404	3.54797	-5.8882	1.72e-06	1.92e-05	4.68942
Git1	0.654209	8.11372	5.8857	1.73e-06	1.93e-05	4.3321
Bub1	-1.33286	1.81269	-5.88552	1.73e-06	1.93e-05	4.88266
Smo	-1.07134	6.31517	-5.88466	1.74e-06	1.94e-05	4.41629
Neurl1a	1.16897	4.21886	5.88276	1.74e-06	1.95e-05	4.51674
Fgfr2	-0.830282	6.76311	-5.88271	1.74e-06	1.95e-05	4.39496
Bcar3	-1.62918	4.63501	-5.87989	1.76e-06	1.96e-05	4.63524
Chst8	1.34331	4.29746	5.87955	1.76e-06	1.96e-05	4.52767
Syngr1	0.966561	7.25224	5.87839	1.77e-06	1.96e-05	4.32118
Nr4a3	1.00595	4.28489	5.87789	1.77e-06	1.97e-05	4.55806
Zfp641	1.03628	3.00924	5.87699	1.77e-06	1.97e-05	4.72537
Ovol2	1.7166	0.125085	5.87662	1.78e-06	1.97e-05	4.93753
Sema4g	0.743972	7.42753	5.87391	1.79e-06	1.98e-05	4.30863
Llgl2	-1.54728	0.897082	-5.87224	1.8e-06	1.99e-05	4.90998
Eef1a2	0.92832	7.78748	5.86745	1.82e-06	2.02e-05	4.28689
Map3k19	-1.91634	2.06731	-5.86716	1.82e-06	2.02e-05	4.8839
Ppfia4	1.21137	5.59755	5.86495	1.84e-06	2.03e-05	4.35432
Arrdc4	0.855382	5.89991	5.8649	1.84e-06	2.03e-05	4.34327
Ppfia3	0.977152	6.20266	5.86441	1.84e-06	2.03e-05	4.31015
Ncdn	0.909759	8.95798	5.86435	1.84e-06	2.03e-05	4.2594
Pstpip1	-1.66201	2.4984	-5.86432	1.84e-06	2.03e-05	4.77635
Nwd2	1.22408	6.04069	5.86411	1.84e-06	2.03e-05	4.30754
Slc12a4	-0.987166	3.78235	-5.86365	1.84e-06	2.03e-05	4.61529
Fam160a2	0.785174	5.82389	5.86039	1.86e-06	2.04e-05	4.34282
Rara	0.760465	4.99025	5.86022	1.86e-06	2.04e-05	4.38605
Itpripl2	-1.37839	2.61801	-5.85896	1.87e-06	2.05e-05	4.73521
LOC108167379	1.2926	3.33559	5.85814	1.87e-06	2.05e-05	4.60768
Glra2	1.09386	5.79623	5.8573	1.88e-06	2.06e-05	4.34142
Zbtb46	1.02485	3.55753	5.85676	1.88e-06	2.06e-05	4.54816
Ikbke	-1.80442	2.0978	-5.85667	1.88e-06	2.06e-05	4.84572
Tifab	-1.52592	-0.441649	-5.85522	1.89e-06	2.06e-05	4.91122
Cspg5	0.603801	9.52305	5.85415	1.89e-06	2.07e-05	4.22724
Fopnl	-0.890061	5.30562	-5.8514	1.91e-06	2.08e-05	4.39548
Lsamp	0.685121	8.92357	5.85111	1.91e-06	2.08e-05	4.22442
Rbm20	-1.9193	1.37337	-5.84884	1.92e-06	2.1e-05	4.8597
Wnk4	-1.91661	0.461753	-5.8473	1.93e-06	2.1e-05	4.84661
Fbxw7	0.817787	6.60123	5.84722	1.93e-06	2.1e-05	4.26102
Lima1	-1.24091	5.20961	-5.84666	1.93e-06	2.1e-05	4.35255
Meis2	-0.867878	8.08882	-5.84483	1.94e-06	2.11e-05	4.21829
Manba	-1.39594	3.13076	-5.8426	1.96e-06	2.12e-05	4.69467
Pygl	-1.23702	2.48881	-5.84078	1.97e-06	2.13e-05	4.7374
Fam219a	0.796559	7.65367	5.83859	1.98e-06	2.15e-05	4.20634
Fzr1	0.815333	6.43678	5.83686	1.99e-06	2.15e-05	4.23487
Rcn3	-1.35515	3.83927	-5.83472	2e-06	2.17e-05	4.60807
Pip5kl1	1.45918	2.76111	5.83039	2.02e-06	2.19e-05	4.60301
Ntsr2	1.03182	5.71423	5.82986	2.03e-06	2.19e-05	4.31075
Tfdp2	-1.2057	4.40632	-5.82931	2.03e-06	2.19e-05	4.47214
Tjp2	-0.992558	6.06172	-5.82776	2.04e-06	2.2e-05	4.26247
Agfg1	-1.01896	4.92807	-5.82732	2.04e-06	2.2e-05	4.34064
Kcnab1	1.05591	5.37599	5.82452	2.06e-06	2.22e-05	4.25593
Snx20	-1.98925	0.136573	-5.82134	2.08e-06	2.24e-05	4.80607
Sv2b	1.60126	6.5372	5.81984	2.09e-06	2.25e-05	4.18849
4931428F04Rik	0.853275	6.33251	5.81899	2.09e-06	2.25e-05	4.17094
Rgs17	0.759672	6.44273	5.81858	2.09e-06	2.25e-05	4.18561
Gli3	-1.48172	5.066	-5.81821	2.1e-06	2.25e-05	4.41351
Sned1	-1.98657	2.58288	-5.81813	2.1e-06	2.25e-05	4.63624
Lmtk3	0.929078	8.07893	5.81738	2.1e-06	2.25e-05	4.13605
Fhod1	-2.05396	1.88027	-5.81418	2.12e-06	2.27e-05	4.69404
Ace	1.32633	2.92788	5.81351	2.12e-06	2.28e-05	4.60001
Tbxas1	-1.94028	0.739396	-5.81298	2.13e-06	2.28e-05	4.77208
Elovl1	-1.01446	4.33863	-5.81267	2.13e-06	2.28e-05	4.42189
Uhmk1	0.711229	7.87847	5.81212	2.13e-06	2.28e-05	4.12362
Lin28b	1.2012	2.21931	5.81185	2.13e-06	2.28e-05	4.68392
Pnck	1.04882	5.23844	5.81072	2.14e-06	2.28e-05	4.26444
Ghr	-1.19109	3.8664	-5.81064	2.14e-06	2.28e-05	4.44518
Pip5k1c	0.60186	8.59535	5.80656	2.17e-06	2.31e-05	4.09715
Bmpr1a	-0.82553	6.57563	-5.80506	2.18e-06	2.32e-05	4.17397
Rims3	0.612481	6.2565	5.80437	2.18e-06	2.32e-05	4.1513
Omd	-1.63983	0.618645	-5.80396	2.18e-06	2.32e-05	4.76583
Fxyd7	1.37205	6.59451	5.80156	2.2e-06	2.33e-05	4.13591
Clic4	-0.665804	7.2671	-5.79977	2.21e-06	2.34e-05	4.10627
Hk1	0.779075	7.98954	5.79966	2.21e-06	2.34e-05	4.09346
Hsd11b1	1.7471	2.37884	5.79888	2.21e-06	2.35e-05	4.58907
Jph3	0.937621	7.42871	5.79869	2.22e-06	2.35e-05	4.09213
Arpc1b	-1.66993	3.18018	-5.79669	2.23e-06	2.36e-05	4.49258
Slc7a8	0.987559	5.74024	5.79495	2.24e-06	2.37e-05	4.14583
Tmem196	1.17348	2.50975	5.79318	2.25e-06	2.38e-05	4.53095
Adi1	-0.876374	5.56016	-5.78951	2.27e-06	2.4e-05	4.22627
Ptar1	-0.961005	5.25789	-5.78733	2.29e-06	2.42e-05	4.22305
Trib3	1.6216	0.731752	5.78627	2.3e-06	2.42e-05	4.66289
Htr6	1.21565	2.30375	5.78493	2.3e-06	2.43e-05	4.57374
Inha	1.093	5.17221	5.78411	2.31e-06	2.43e-05	4.15166
Unkl	0.96987	5.18852	5.78054	2.33e-06	2.46e-05	4.18179
Gbas	-0.568091	6.86931	-5.78018	2.34e-06	2.46e-05	4.07176
Magel2	1.53726	2.34525	5.77985	2.34e-06	2.46e-05	4.50803
Cacna2d2	0.822595	5.34215	5.77843	2.35e-06	2.46e-05	4.13252
Dlg4	0.877782	7.77379	5.77717	2.36e-06	2.47e-05	4.02938
Frmd8	-0.994349	4.39362	-5.7771	2.36e-06	2.47e-05	4.28646
Icam5	1.17687	4.97627	5.77492	2.37e-06	2.48e-05	4.18519
Uhrf1	-0.980132	4.96926	-5.77485	2.37e-06	2.48e-05	4.17026
Mcm7	-0.719378	6.47822	-5.77463	2.37e-06	2.48e-05	4.07216
Pitpnm1	0.87798	5.98569	5.77424	2.38e-06	2.48e-05	4.07615
Kcnh4	1.37431	2.14748	5.77389	2.38e-06	2.48e-05	4.53244
Ahnak2	-1.45704	0.934589	-5.77378	2.38e-06	2.48e-05	4.5921
Knstrn	-1.06382	3.77814	-5.77259	2.39e-06	2.49e-05	4.33968
9030617O03Rik	-1.15045	4.08668	-5.7723	2.39e-06	2.49e-05	4.39375
Fignl1	-1.33124	2.82666	-5.77104	2.4e-06	2.5e-05	4.3863
Cyp4x1	1.13585	4.48598	5.76714	2.42e-06	2.52e-05	4.1805
Tardbp	-0.816475	8.13751	-5.76668	2.43e-06	2.52e-05	3.99318
Mvd	1.60466	5.78462	5.76474	2.44e-06	2.54e-05	4.01576
Plce1	-1.51794	4.59579	-5.76463	2.44e-06	2.54e-05	4.28775
Cdkn3	-1.40906	2.32795	-5.7642	2.44e-06	2.54e-05	4.49936
Wdr7	0.803746	7.81959	5.7634	2.45e-06	2.54e-05	3.99072
A730017C20Rik	1.27037	3.62415	5.76169	2.46e-06	2.55e-05	4.27857
Cd164	-0.978203	6.44229	-5.76053	2.47e-06	2.56e-05	4.05516
Naaladl2	-1.56482	1.48034	-5.75704	2.5e-06	2.58e-05	4.606
Klc2	0.914308	6.88805	5.75525	2.51e-06	2.59e-05	3.98415
Nek9	-1.06001	6.21191	-5.7551	2.51e-06	2.59e-05	4.06152
Vamp2	0.905084	10.5591	5.75448	2.51e-06	2.6e-05	3.93064
Syt16	0.859987	6.81361	5.75357	2.52e-06	2.6e-05	3.98776
Olfm2	0.941211	7.93503	5.75204	2.53e-06	2.61e-05	3.94501
Cyp4v3	-1.60427	3.4615	-5.7497	2.55e-06	2.63e-05	4.43633
Raph1	0.855434	5.61475	5.74126	2.61e-06	2.69e-05	4.0095
Ptpn5	1.02653	6.55951	5.74125	2.61e-06	2.69e-05	3.94691
Slc16a12	-1.60264	1.09826	-5.74065	2.61e-06	2.69e-05	4.55435
Zfp36l2	-0.840255	6.43784	-5.73827	2.63e-06	2.7e-05	3.99833
Trnp1	1.25488	4.89871	5.737	2.64e-06	2.71e-05	4.06399
Atcay	0.811792	8.087	5.7344	2.66e-06	2.73e-05	3.90202
Gtpbp6	0.925528	4.48784	5.73048	2.69e-06	2.76e-05	4.10028
Vsig10	-1.58996	1.94944	-5.7304	2.69e-06	2.76e-05	4.48762
Lgals3bp	-1.32728	4.24692	-5.72925	2.7e-06	2.76e-05	4.17445
Gm44505	-0.702248	7.87252	-5.72912	2.7e-06	2.76e-05	3.89552
Gpr68	1.34052	1.23159	5.72795	2.71e-06	2.77e-05	4.46551
9330133O14Rik	0.86257	4.35826	5.7265	2.72e-06	2.78e-05	4.06142
Arhgap33	0.865516	7.5749	5.72537	2.73e-06	2.79e-05	3.87789
Stmn4	0.920993	7.43421	5.72252	2.75e-06	2.81e-05	3.87759
Rnf123	0.682301	5.69622	5.72177	2.76e-06	2.81e-05	3.94085
Dusp6	-0.896397	4.63642	-5.72154	2.76e-06	2.81e-05	4.05849
2610002M06Rik	0.813351	6.19266	5.72139	2.76e-06	2.81e-05	3.9261
Col4a6	-2.00621	2.0817	-5.72087	2.77e-06	2.81e-05	4.42864
Grin2c	-1.72954	1.07568	-5.71955	2.78e-06	2.82e-05	4.4721
Irgm1	-2.49081	1.40395	-5.71892	2.78e-06	2.82e-05	4.47571
Fbxo32	-1.49789	4.17718	-5.7187	2.78e-06	2.82e-05	4.23887
Plekhh2	-2.09972	1.43413	-5.71869	2.78e-06	2.82e-05	4.4742
Dgat2	0.820951	5.35351	5.71528	2.81e-06	2.85e-05	3.96674
Slc29a2	0.663623	4.71194	5.71378	2.82e-06	2.86e-05	4.02193
Tmem74b	1.00564	2.82219	5.71366	2.82e-06	2.86e-05	4.24634
Pycard	-1.3432	1.45121	-5.71193	2.84e-06	2.87e-05	4.44929
6330403K07Rik	0.790263	7.03915	5.71076	2.85e-06	2.88e-05	3.86163
Slc6a17	1.10023	6.57572	5.70962	2.86e-06	2.89e-05	3.87211
Plcg2	-2.15989	2.36127	-5.7083	2.87e-06	2.89e-05	4.39744
Dgkz	0.756078	6.43974	5.70692	2.88e-06	2.9e-05	3.86855
Gpc4	-2.01485	3.62271	-5.70685	2.88e-06	2.9e-05	4.27043
Resp18	1.84612	2.05809	5.70649	2.88e-06	2.9e-05	4.35319
Slc45a1	0.920692	5.68227	5.69735	2.96e-06	2.98e-05	3.85852
Jph2	-1.9711	0.186176	-5.69616	2.97e-06	2.99e-05	4.45168
Mtmr10	-1.09048	4.283	-5.69416	2.99e-06	3e-05	4.09708
Sqle	0.902896	8.67676	5.6933	2.99e-06	3e-05	3.77412
Usp8	-1.01438	5.64545	-5.69321	2.99e-06	3e-05	3.90338
Pdzd4	0.838429	5.95437	5.691	3.01e-06	3.02e-05	3.84514
Gldc	-1.11338	6.43182	-5.68962	3.02e-06	3.03e-05	3.87571
Ccdc60	-1.69714	1.82013	-5.68766	3.04e-06	3.05e-05	4.38993
Prkab1	-0.761507	5.63837	-5.68543	3.06e-06	3.06e-05	3.88225
Adam19	0.868156	4.73976	5.68536	3.06e-06	3.06e-05	3.86891
Ppm1h	0.884419	5.77571	5.68447	3.07e-06	3.07e-05	3.84888
Rsph9	0.832673	4.61458	5.6798	3.11e-06	3.11e-05	3.9444
Panx2	0.921012	4.49204	5.67891	3.12e-06	3.11e-05	3.92147
Arpin	-0.922841	5.47832	-5.67684	3.14e-06	3.13e-05	3.89302
Capsl	-1.4049	1.96211	-5.67649	3.14e-06	3.13e-05	4.33118
Rfx4	-1.19958	6.39631	-5.67429	3.16e-06	3.15e-05	3.8172
Fgfrl1	-1.40216	3.20834	-5.67149	3.18e-06	3.17e-05	4.1666
Efhb	-1.81987	1.18745	-5.67121	3.19e-06	3.17e-05	4.36995
Pdgfrb	-1.17454	4.79123	-5.67078	3.19e-06	3.17e-05	3.92418
Ednrb	-0.774224	8.54928	-5.67066	3.19e-06	3.17e-05	3.72418
Tlr9	-1.47793	-0.0748994	-5.67028	3.2e-06	3.17e-05	4.38783
Glrb	0.814438	6.78965	5.66996	3.2e-06	3.17e-05	3.76752
Fanci	-1.25322	2.23041	-5.66994	3.2e-06	3.17e-05	4.21216
Sh3gl2	0.982406	6.98956	5.66792	3.22e-06	3.19e-05	3.74462
B4galt2	0.756778	6.78921	5.6674	3.22e-06	3.19e-05	3.73416
Cdk4	-0.642168	8.26362	-5.66731	3.22e-06	3.19e-05	3.70855
Fstl5	0.958048	4.89029	5.66432	3.25e-06	3.21e-05	3.897
H2-Q2	2.34327	1.07023	5.66264	3.27e-06	3.23e-05	4.26743
Catip	-1.80573	1.20215	-5.66225	3.27e-06	3.23e-05	4.35142
Cbs	1.06106	4.54229	5.66059	3.29e-06	3.24e-05	3.97535
Crmp1	0.957801	10.4622	5.66012	3.29e-06	3.24e-05	3.65934
Cachd1	-1.1078	5.03586	-5.65907	3.3e-06	3.25e-05	3.91716
Chrdl1	-1.37855	3.15925	-5.65775	3.31e-06	3.26e-05	4.1639
Fam162a	0.929807	6.65856	5.6573	3.32e-06	3.26e-05	3.72544
Oprl1	0.799333	5.99181	5.65293	3.36e-06	3.3e-05	3.72976
Dnm1	1.0121	9.26758	5.65266	3.36e-06	3.3e-05	3.65329
Aloxe3	1.21581	2.1123	5.65187	3.37e-06	3.31e-05	4.18655
Ppm1e	0.673082	7.45771	5.65137	3.37e-06	3.31e-05	3.68128
Dusp2	1.48679	0.912717	5.64758	3.41e-06	3.34e-05	4.25554
Abcb9	0.969629	4.39407	5.64721	3.41e-06	3.34e-05	3.86865
Osbpl9	-0.683221	5.54676	-5.64569	3.43e-06	3.36e-05	3.7871
Rab15	0.985134	5.41268	5.64336	3.45e-06	3.38e-05	3.73755
Aox1	-1.6529	2.67558	-5.64295	3.46e-06	3.38e-05	4.25202
Galk1	0.761343	5.09073	5.64265	3.46e-06	3.38e-05	3.7718
Kif18b	-1.08764	3.77318	-5.64204	3.46e-06	3.38e-05	3.94634
Tmem63a	-1.26837	2.00495	-5.6386	3.5e-06	3.41e-05	4.18792
Apc2	0.731286	7.52312	5.63649	3.52e-06	3.43e-05	3.62327
Dubr	1.10088	3.02218	5.63533	3.53e-06	3.44e-05	4.00636
F11r	-1.66689	1.28648	-5.63515	3.53e-06	3.44e-05	4.21456
Trabd2b	-1.34114	0.534147	-5.63095	3.58e-06	3.48e-05	4.25362
Ppp1r3d	1.01226	3.06799	5.62859	3.6e-06	3.5e-05	3.99333
Fkbp9	-1.19308	6.66821	-5.62851	3.6e-06	3.5e-05	3.68218
Slc7a5	0.698432	8.42696	5.6278	3.61e-06	3.5e-05	3.59342
Rpusd1	0.913503	4.28319	5.62633	3.62e-06	3.52e-05	3.83461
Enc1	0.865237	7.73042	5.6251	3.64e-06	3.53e-05	3.59269
Smtn	-1.34316	2.60647	-5.62353	3.65e-06	3.54e-05	4.07778
Kcnt2	1.10258	3.35263	5.62291	3.66e-06	3.54e-05	3.8941
Prph	1.47189	2.62792	5.62229	3.67e-06	3.55e-05	4.04684
Ndrg2	0.654901	8.16368	5.62005	3.69e-06	3.57e-05	3.58028
Prr11	-1.11216	3.6534	-5.61868	3.7e-06	3.58e-05	3.93638
4931406C07Rik	-0.664113	6.78916	-5.61813	3.71e-06	3.58e-05	3.60777
Rassf7	1.40978	1.33243	5.61599	3.73e-06	3.6e-05	4.11964
Sprn	1.12611	3.39296	5.61399	3.75e-06	3.62e-05	3.82593
Tmem8b	0.661764	6.56892	5.61349	3.76e-06	3.62e-05	3.5894
Ctsc	-1.27042	2.38602	-5.61195	3.78e-06	3.64e-05	4.0361
Mcam	-1.37655	2.95986	-5.60898	3.81e-06	3.66e-05	4.00246
Tceal5	1.12836	4.78465	5.60516	3.85e-06	3.7e-05	3.73562
Slc25a45	-1.58624	1.28446	-5.60471	3.85e-06	3.7e-05	4.15279
2900011O08Rik	0.684967	8.97724	5.60365	3.87e-06	3.71e-05	3.51889
Aplp1	0.873481	8.35681	5.60316	3.87e-06	3.71e-05	3.5257
Plod2	-1.21493	4.68024	-5.60309	3.87e-06	3.71e-05	3.74525
Epha8	0.966536	3.41958	5.6022	3.88e-06	3.72e-05	3.8005
Sgtb	0.858277	5.51847	5.6004	3.9e-06	3.74e-05	3.62564
Ctdsp1	-0.978759	7.20588	-5.60011	3.9e-06	3.74e-05	3.57019
Magee2	1.2271	3.06528	5.59664	3.94e-06	3.77e-05	3.92673
Tns2	-1.74285	1.21426	-5.59555	3.96e-06	3.78e-05	4.11101
Adgrl1	0.735456	9.29354	5.59404	3.97e-06	3.8e-05	3.48361
Asap3	-1.36844	3.01915	-5.59238	3.99e-06	3.81e-05	3.91735
Epn1	0.742862	7.88252	5.5902	4.02e-06	3.83e-05	3.49781
C1ql1	-0.960109	4.85997	-5.58335	4.1e-06	3.91e-05	3.65387
Hspb9	-1.4966	0.796137	-5.58196	4.11e-06	3.92e-05	4.12749
4933407L21Rik	-1.47211	2.42941	-5.58118	4.12e-06	3.93e-05	3.96465
Vps28	0.78909	7.92724	5.58062	4.13e-06	3.93e-05	3.46972
Serpinb8	-1.7281	0.586977	-5.57889	4.15e-06	3.95e-05	4.09818
Vrk2	-1.59261	0.928832	-5.57567	4.19e-06	3.98e-05	4.10816
Slc6a7	1.5204	4.42833	5.57525	4.19e-06	3.98e-05	3.61856
Epha2	-1.88799	0.809241	-5.57501	4.2e-06	3.98e-05	4.09348
1700001L19Rik	1.28813	4.12134	5.57418	4.21e-06	3.99e-05	3.67854
Epb41l2	-0.798642	6.77216	-5.57015	4.25e-06	4.03e-05	3.49577
Pced1a	0.742807	5.00511	5.57004	4.26e-06	4.03e-05	3.57951
Chd4	-0.855739	7.97009	-5.56928	4.26e-06	4.04e-05	3.43523
Mylk	-1.61938	1.0332	-5.56865	4.27e-06	4.04e-05	4.0701
Glis3	-1.92348	2.51552	-5.56793	4.28e-06	4.05e-05	3.97917
Il21r	-1.75836	0.285663	-5.56695	4.29e-06	4.06e-05	4.09767
Fam114a1	-1.60903	2.02114	-5.56581	4.31e-06	4.07e-05	3.99207
Tcf12	-0.669924	7.20266	-5.56561	4.31e-06	4.07e-05	3.46347
Rnf220	0.701061	7.1633	5.56354	4.33e-06	4.09e-05	3.43746
Sstr4	1.08463	4.80868	5.56342	4.34e-06	4.09e-05	3.54017
Pdyn	-1.35059	2.76533	-5.56285	4.34e-06	4.09e-05	3.78113
Srsf2	-0.631324	8.36226	-5.56214	4.35e-06	4.1e-05	3.40602
Zak	-1.31877	5.06515	-5.56006	4.38e-06	4.12e-05	3.60407
Cpne7	1.46521	4.00555	5.55741	4.41e-06	4.15e-05	3.70096
Tbc1d25	0.781249	4.47027	5.55166	4.48e-06	4.21e-05	3.59876
Dlx3	1.37124	-0.331312	5.5504	4.5e-06	4.22e-05	4.06089
Nr3c1	-1.15264	5.42203	-5.54876	4.52e-06	4.24e-05	3.50629
Neat1	-2.20437	1.29446	-5.54612	4.56e-06	4.27e-05	4.01269
Npas2	1.04745	4.554	5.54549	4.56e-06	4.27e-05	3.63897
Nup93	-0.751604	4.83982	-5.5454	4.57e-06	4.27e-05	3.52978
Dhx40	-1.0244	5.99586	-5.54461	4.58e-06	4.28e-05	3.4765
Myt1	-0.635641	5.95851	-5.54382	4.59e-06	4.29e-05	3.44168
Nup62cl	-1.85613	0.939664	-5.54369	4.59e-06	4.29e-05	4.0057
Slc37a3	0.579904	6.64378	5.54042	4.63e-06	4.32e-05	3.38874
Was	-1.85239	0.142366	-5.54032	4.63e-06	4.32e-05	4.0218
Tmem151a	1.10548	4.69452	5.53876	4.65e-06	4.34e-05	3.54909
Mcm2	-0.858934	4.75065	-5.53754	4.67e-06	4.35e-05	3.49547
Ide	-0.659997	7.07868	-5.53651	4.68e-06	4.36e-05	3.36499
Spata17	-1.61612	1.31007	-5.53645	4.68e-06	4.36e-05	4.00892
Inpp4a	0.820414	6.95566	5.53643	4.68e-06	4.36e-05	3.35879
Cyb561	1.08203	5.22197	5.53518	4.7e-06	4.37e-05	3.43115
1700016K19Rik	1.28994	2.28964	5.53206	4.74e-06	4.41e-05	3.89087
Parp6	0.74885	7.36537	5.5311	4.76e-06	4.41e-05	3.33714
Doc2a	1.4335	4.61205	5.53105	4.76e-06	4.41e-05	3.51797
Bcl6b	1.65045	1.35814	5.53024	4.77e-06	4.42e-05	3.84653
Jmy	-0.685422	6.90091	-5.52838	4.79e-06	4.44e-05	3.35496
Cmtm6	-0.929228	5.60463	-5.52772	4.8e-06	4.45e-05	3.44883
Srpx	-1.76714	0.777169	-5.52191	4.88e-06	4.52e-05	3.95735
Tjp1	-0.96043	7.68142	-5.52033	4.9e-06	4.54e-05	3.30773
Ifngr1	-1.07689	5.17165	-5.5201	4.91e-06	4.54e-05	3.55323
Plxnb3	-1.77087	2.81085	-5.5197	4.91e-06	4.54e-05	3.80306
Plekhg2	-1.46949	3.46362	-5.51771	4.94e-06	4.56e-05	3.62745
Gpr162	0.804578	6.96307	5.5175	4.94e-06	4.56e-05	3.31311
Rtn1	0.661986	10.9423	5.51458	4.99e-06	4.6e-05	3.24203
Kcnq3	1.13319	5.98926	5.51326	5e-06	4.61e-05	3.31845
Pdia4	-0.715756	7.20505	-5.5115	5.03e-06	4.63e-05	3.3078
1810030O07Rik	-0.802784	5.35812	-5.50997	5.05e-06	4.65e-05	3.38178
Arhgap27	-1.36076	0.47785	-5.50637	5.1e-06	4.69e-05	3.92483
Zfp575	1.37001	3.48321	5.50591	5.11e-06	4.69e-05	3.60557
Vps37c	0.690097	5.24608	5.50571	5.11e-06	4.69e-05	3.37701
Gdap1l1	0.844501	7.23185	5.50549	5.12e-06	4.69e-05	3.27066
Slc17a7	1.52003	7.54674	5.50549	5.12e-06	4.69e-05	3.25148
Cplx1	0.924224	7.93146	5.50538	5.12e-06	4.69e-05	3.24735
Neurl1b	0.791026	6.25332	5.5035	5.15e-06	4.71e-05	3.28404
Slc8a2	1.08546	7.01061	5.50263	5.16e-06	4.72e-05	3.24861
Spats2l	-0.937867	4.81009	-5.49722	5.24e-06	4.79e-05	3.37591
Tor4a	-1.62726	0.6891	-5.49507	5.27e-06	4.82e-05	3.87897
Smc2	-0.984746	3.86431	-5.49468	5.28e-06	4.82e-05	3.57509
Tmem25	0.997841	3.84481	5.49376	5.29e-06	4.83e-05	3.54614
Ptgs1	-1.59637	1.5199	-5.49231	5.31e-06	4.85e-05	3.83275
Tacr1	1.23794	2.62129	5.48903	5.36e-06	4.89e-05	3.73411
Plscr4	-1.60343	2.50056	-5.48864	5.37e-06	4.89e-05	3.73351
Ankra2	0.605976	6.33578	5.48832	5.37e-06	4.89e-05	3.26317
Htra3	-1.15418	2.26156	-5.48501	5.43e-06	4.94e-05	3.74166
Kif3a	0.571234	8.30679	5.48308	5.46e-06	4.96e-05	3.18173
Srpx2	-1.78076	0.537066	-5.48214	5.47e-06	4.97e-05	3.86105
Spg20	-0.915137	4.31177	-5.48077	5.49e-06	4.99e-05	3.46719
Susd4	0.711759	6.33239	5.48066	5.49e-06	4.99e-05	3.25215
Rasgrp2	0.930661	6.36676	5.47993	5.51e-06	4.99e-05	3.19507
Hpse	-1.48615	0.99258	-5.47915	5.52e-06	5e-05	3.7894
Ptpru	0.656973	5.4773	5.47785	5.54e-06	5.02e-05	3.24658
Garem	0.699014	6.12237	5.4763	5.56e-06	5.04e-05	3.23288
Stc2	1.84794	1.94387	5.47082	5.65e-06	5.11e-05	3.68742
Pdgfa	0.696427	5.78328	5.46927	5.68e-06	5.13e-05	3.23292
Tcf7	-1.77147	0.407093	-5.46763	5.7e-06	5.15e-05	3.81812
P3h3	-1.39641	2.94586	-5.46722	5.71e-06	5.16e-05	3.59261
Diras2	1.09276	5.84023	5.46672	5.72e-06	5.16e-05	3.19927
Nxnl2	1.70044	0.175548	5.4573	5.87e-06	5.3e-05	3.76136
Arhgap22	-1.69251	1.6081	-5.45502	5.91e-06	5.33e-05	3.6926
Cabp7	1.35029	1.88341	5.45352	5.94e-06	5.35e-05	3.61154
Mef2c	1.01177	8.26268	5.4525	5.95e-06	5.36e-05	3.08878
Ccdc129	1.84108	1.02981	5.44928	6.01e-06	5.41e-05	3.69957
Ywhag	0.912252	9.61515	5.44902	6.01e-06	5.41e-05	3.06616
Card9	-1.65962	0.293519	-5.44885	6.02e-06	5.41e-05	3.76415
Tead3	-1.4336	3.83979	-5.44792	6.03e-06	5.42e-05	3.50029
Gdi1	0.673926	8.6448	5.44515	6.08e-06	5.46e-05	3.06948
Cpne5	0.841208	4.85003	5.44446	6.09e-06	5.47e-05	3.25566
Zfp703	-0.887545	5.33926	-5.44258	6.13e-06	5.49e-05	3.18401
Sepw1	0.798079	10.9215	5.44198	6.14e-06	5.5e-05	3.03504
Olfm1	0.943797	8.26374	5.44128	6.15e-06	5.51e-05	3.06779
Flt1	-1.61499	0.720709	-5.44104	6.15e-06	5.51e-05	3.71082
Itga2	-1.75007	1.2205	-5.43909	6.19e-06	5.53e-05	3.73654
Tubb4a	0.688465	9.32669	5.43725	6.22e-06	5.56e-05	3.03169
Emc8	-0.839825	6.70538	-5.43684	6.23e-06	5.56e-05	3.0876
Grm8	0.989452	4.09184	5.43624	6.24e-06	5.57e-05	3.43815
Pcmt1	0.669284	6.10408	5.43559	6.25e-06	5.57e-05	3.12858
Necab3	1.89311	1.70362	5.43413	6.28e-06	5.59e-05	3.58636
Ncapg	-1.05037	2.75949	-5.43245	6.31e-06	5.62e-05	3.45075
Nrcam	0.689285	8.28423	5.43008	6.35e-06	5.65e-05	3.03606
Flot1	0.656098	5.75794	5.43006	6.35e-06	5.65e-05	3.13462
Wasf2	-0.988488	4.74488	-5.4288	6.37e-06	5.67e-05	3.2938
Golm1	-0.759259	5.44038	-5.42867	6.37e-06	5.67e-05	3.19506
Adcy2	0.767559	5.14446	5.42796	6.39e-06	5.67e-05	3.16099
Eml3	-1.16653	3.74368	-5.42671	6.41e-06	5.69e-05	3.42852
Nub1	0.587763	7.3398	5.42621	6.42e-06	5.69e-05	3.04238
Mfap3l	-0.680806	5.77956	-5.42587	6.43e-06	5.69e-05	3.12061
Kcnb1	0.70508	6.08726	5.42584	6.43e-06	5.69e-05	3.09825
Cdh12	1.18908	4.32642	5.42502	6.44e-06	5.7e-05	3.18582
Ahi1	0.822744	5.47034	5.42278	6.48e-06	5.73e-05	3.17257
Impact	-0.80295	5.76932	-5.42268	6.48e-06	5.73e-05	3.13447
Gata2	-1.45623	0.167851	-5.41906	6.55e-06	5.79e-05	3.65794
Ddx21	-0.627072	6.50243	-5.41596	6.61e-06	5.84e-05	3.04072
Oasl2	-2.20076	2.03357	-5.4103	6.72e-06	5.93e-05	3.61887
Smad6	-1.67379	0.997666	-5.40925	6.74e-06	5.94e-05	3.64898
Cmbl	-1.40747	1.0241	-5.40821	6.76e-06	5.96e-05	3.60391
Kcnc4	1.43966	2.68125	5.40784	6.77e-06	5.96e-05	3.41699
Slc7a3	1.91996	1.22528	5.40602	6.8e-06	5.99e-05	3.63041
Rtn4r	1.19445	2.66605	5.40535	6.81e-06	6e-05	3.33267
Grid1	0.713382	5.52883	5.40385	6.84e-06	6.02e-05	3.05411
Map3k7cl	-1.48089	0.507604	-5.40273	6.87e-06	6.03e-05	3.64722
Fcho1	0.796001	6.39078	5.40067	6.91e-06	6.07e-05	2.99231
Vamp5	-1.73551	0.323098	-5.40036	6.91e-06	6.07e-05	3.62813
Crhbp	1.43097	2.50681	5.39915	6.94e-06	6.09e-05	3.49922
Slco4c1	1.7203	0.864547	5.39502	7.02e-06	6.15e-05	3.5647
AI854703	1.01725	3.52384	5.39384	7.04e-06	6.17e-05	3.23208
Igfbpl1	-1.18587	5.72294	-5.39197	7.08e-06	6.2e-05	3.03309
Usp29	0.791762	5.68744	5.39105	7.1e-06	6.21e-05	2.98456
Serpinb5	-1.44293	0.931613	-5.39101	7.1e-06	6.21e-05	3.60454
Olfml1	-1.29634	3.6057	-5.39084	7.1e-06	6.21e-05	3.30606
Cntrl	-1.05912	4.46139	-5.39081	7.1e-06	6.21e-05	3.22506
Cgn	0.990677	3.14478	5.38825	7.16e-06	6.25e-05	3.26442
Znrf1	0.751707	7.27589	5.38686	7.18e-06	6.27e-05	2.93783
Aqp11	0.945435	4.46108	5.38634	7.19e-06	6.27e-05	3.14267
Caly	0.921406	5.32789	5.38559	7.21e-06	6.28e-05	3.01905
Slc16a14	0.769097	4.65588	5.38521	7.22e-06	6.29e-05	3.06496
Parp3	-1.83423	0.487388	-5.38486	7.23e-06	6.29e-05	3.58147
Gabrb3	0.707914	7.54947	5.3841	7.24e-06	6.3e-05	2.90909
Ugp2	-0.835406	7.222	-5.38213	7.28e-06	6.33e-05	2.9354
Fam98c	1.16949	3.54643	5.38186	7.29e-06	6.33e-05	3.32193
Cdkn2a	-1.28901	1.75351	-5.37778	7.37e-06	6.4e-05	3.49191
Lypd6b	0.957186	3.67173	5.37739	7.38e-06	6.41e-05	3.16507
Cnih3	0.898005	6.49707	5.37423	7.45e-06	6.46e-05	2.90465
Nqo2	-1.43607	3.19188	-5.37267	7.48e-06	6.48e-05	3.34143
Satb2	0.891932	7.17562	5.37237	7.49e-06	6.49e-05	2.88176
Gabra5	1.06227	6.92761	5.36927	7.56e-06	6.54e-05	2.88489
Dbf4	-1.20187	2.96019	-5.36831	7.58e-06	6.55e-05	3.30426
Pak4	-0.773531	5.58615	-5.36655	7.61e-06	6.58e-05	2.99442
Mycl	0.605973	6.66243	5.3651	7.65e-06	6.61e-05	2.88133
Gfra4	1.07381	4.52561	5.36445	7.66e-06	6.62e-05	3.09094
Kcnj9	0.976706	3.82462	5.36229	7.71e-06	6.65e-05	3.08608
Rims1	0.950896	6.03052	5.36218	7.71e-06	6.65e-05	2.92817
Tmem169	0.843585	4.74592	5.36101	7.74e-06	6.67e-05	3.02534
Rabif	0.692581	6.34688	5.36005	7.76e-06	6.68e-05	2.88344
Syce2	1.00194	3.68082	5.35925	7.77e-06	6.69e-05	3.17366
Larp7	-0.673625	4.85891	-5.35759	7.81e-06	6.72e-05	3.05552
Gjd2	1.04341	4.73496	5.35664	7.83e-06	6.74e-05	3.00473
Snx21	0.94745	4.78128	5.35545	7.86e-06	6.76e-05	3.01363
Loxl3	-1.43089	3.57251	-5.35448	7.88e-06	6.77e-05	3.28071
Mthfd1l	0.873025	3.87511	5.3529	7.92e-06	6.8e-05	3.0694
Ttc7b	0.718071	5.57785	5.35049	7.97e-06	6.84e-05	2.96248
Fam46c	-1.95054	0.525621	-5.34963	7.99e-06	6.85e-05	3.47754
Fto	0.623043	7.15267	5.3492	8e-06	6.86e-05	2.82817
Nt5c1a	-1.61761	1.37356	-5.34884	8.01e-06	6.86e-05	3.40882
Ell2	-0.853789	3.54203	-5.34864	8.01e-06	6.86e-05	3.21402
Fbxl7	-1.91572	3.55825	-5.348	8.03e-06	6.87e-05	3.26224
Parp12	-1.29061	4.05907	-5.34517	8.09e-06	6.92e-05	3.20266
Syngr3	1.06985	6.86626	5.34476	8.1e-06	6.92e-05	2.81057
Scara5	-1.37735	0.36776	-5.34475	8.1e-06	6.92e-05	3.45691
Ehd3	0.704379	6.70798	5.34456	8.11e-06	6.92e-05	2.83358
Crtc3	-0.897604	6.02973	-5.34334	8.14e-06	6.94e-05	2.90395
Nfatc3	-0.89983	4.17808	-5.34304	8.14e-06	6.94e-05	3.1041
Usp20	0.695014	5.77478	5.3398	8.22e-06	7e-05	2.84792
Gpr37	1.00299	3.5404	5.33971	8.22e-06	7e-05	3.09311
Ttc9	0.653545	6.30133	5.3394	8.23e-06	7e-05	2.82509
Eva1c	-1.51549	0.622799	-5.33908	8.24e-06	7e-05	3.43595
Atp6v1e1	0.80932	7.95662	5.33864	8.25e-06	7.01e-05	2.77684
Elf2	-1.07427	5.99463	-5.33813	8.26e-06	7.01e-05	2.841
Bard1	-1.20516	2.40811	-5.33785	8.27e-06	7.02e-05	3.24817
Trpm3	1.02661	4.78227	5.3362	8.3e-06	7.05e-05	2.92266
Hcn3	0.972537	5.08638	5.33375	8.36e-06	7.09e-05	2.88728
Olfm3	1.11458	3.365	5.33362	8.37e-06	7.09e-05	3.21457
Fam168a	0.591416	8.12166	5.33358	8.37e-06	7.09e-05	2.7564
Ildr2	-0.931953	3.85416	-5.33325	8.38e-06	7.09e-05	3.00981
Tcf19	-1.45818	2.37483	-5.33279	8.39e-06	7.09e-05	3.26575
Hccs	-0.772576	4.83829	-5.33265	8.39e-06	7.09e-05	2.95469
Rpa1	-0.746019	6.93301	-5.3315	8.42e-06	7.11e-05	2.78957
Slc41a1	-0.74495	7.20717	-5.33138	8.42e-06	7.11e-05	2.77611
Lancl1	0.729214	5.64646	5.33071	8.44e-06	7.12e-05	2.86492
Fndc3b	-0.828406	5.48339	-5.33061	8.44e-06	7.12e-05	2.89879
Kndc1	0.797832	5.47292	5.32627	8.54e-06	7.2e-05	2.84116
Dnaaf3	-1.8093	1.12176	-5.3254	8.57e-06	7.21e-05	3.40038
Srsf9	-0.658302	5.87139	-5.32524	8.57e-06	7.21e-05	2.81928
Arf1	0.571228	9.54285	5.32499	8.58e-06	7.22e-05	2.71854
Gbp9	-1.44145	-0.0563356	-5.32408	8.6e-06	7.23e-05	3.42084
Klhl3	0.827216	5.98871	5.32283	8.63e-06	7.25e-05	2.80211
Lgi4	-1.1163	2.51292	-5.32177	8.65e-06	7.27e-05	3.20087
6430573F11Rik	1.35788	1.68707	5.32099	8.67e-06	7.28e-05	3.2662
Dennd4c	-0.96306	4.78938	-5.31971	8.71e-06	7.3e-05	2.98796
Naip5	-1.43818	0.0201107	-5.31966	8.71e-06	7.3e-05	3.40555
Junb	-1.4799	5.82174	-5.31947	8.71e-06	7.3e-05	2.91884
Shisa2	1.03821	2.52241	5.3192	8.72e-06	7.3e-05	3.21746
Lpin3	-1.43361	1.10577	-5.31824	8.74e-06	7.32e-05	3.36101
Vwa5b2	0.852386	3.31591	5.31749	8.76e-06	7.33e-05	3.04443
Tekt1	-1.7822	2.84039	-5.31707	8.77e-06	7.33e-05	3.27617
Stum	1.23079	4.53959	5.3135	8.86e-06	7.4e-05	2.88379
Aim1	-1.85168	0.228272	-5.31338	8.87e-06	7.4e-05	3.38505
LOC108167848	0.942681	3.35124	5.31184	8.9e-06	7.43e-05	3.03371
Kif14	-1.02289	2.68518	-5.31149	8.91e-06	7.43e-05	3.13461
Fxyd2	1.24505	3.1342	5.31079	8.93e-06	7.44e-05	3.15727
Adgrb3	0.753111	6.7784	5.3104	8.94e-06	7.45e-05	2.71751
C2cd4c	1.33228	2.01143	5.30964	8.96e-06	7.46e-05	3.19735
Dock5	-1.41924	1.99182	-5.30956	8.96e-06	7.46e-05	3.27348
2410004B18Rik	0.76889	6.00392	5.30824	9e-06	7.48e-05	2.77859
Ctla2a	-1.95947	0.479086	-5.30561	9.06e-06	7.53e-05	3.36592
Mgat5b	0.777723	6.91839	5.30406	9.1e-06	7.56e-05	2.68875
Lims1	-0.549476	6.47089	-5.30397	9.11e-06	7.56e-05	2.72831
Slc37a4	0.759146	5.05837	5.30213	9.16e-06	7.6e-05	2.77746
Hcn4	0.673558	6.05817	5.3019	9.16e-06	7.6e-05	2.71857
Usp25	-0.878583	5.26251	-5.30143	9.17e-06	7.6e-05	2.80526
Apbb3	0.712385	4.59491	5.30005	9.21e-06	7.63e-05	2.86979
Trak1	0.742686	6.99383	5.29968	9.22e-06	7.63e-05	2.68095
Arf3	0.698808	10.05	5.29777	9.27e-06	7.67e-05	2.6329
Samd5	-0.973854	3.71241	-5.29706	9.29e-06	7.68e-05	3.00109
Ccne2	-1.08301	2.49591	-5.29668	9.3e-06	7.68e-05	3.15916
Adcy1	0.882692	8.98228	5.29635	9.31e-06	7.69e-05	2.63419
Xrcc2	-1.09314	2.58729	-5.29511	9.34e-06	7.71e-05	3.11498
P3h1	-1.06925	4.33127	-5.29422	9.36e-06	7.72e-05	3.00799
Snap23	-0.992456	4.27779	-5.29407	9.37e-06	7.72e-05	2.96963
Ccser2	0.635454	6.96898	5.29363	9.38e-06	7.73e-05	2.67357
Rimbp2	0.898958	6.06357	5.29334	9.39e-06	7.73e-05	2.69751
Gbp7	-1.54696	2.60209	-5.29327	9.39e-06	7.73e-05	3.20007
Mapk8ip3	0.647319	7.81897	5.29029	9.47e-06	7.79e-05	2.63917
Scamp2	-0.945619	5.12466	-5.28868	9.51e-06	7.82e-05	2.80945
Cd200r1	-1.45953	-0.242809	-5.28843	9.52e-06	7.82e-05	3.33124
Rffl	-1.18806	2.81823	-5.28797	9.53e-06	7.83e-05	3.11118
Spc25	-1.12952	4.32813	-5.28686	9.56e-06	7.85e-05	2.9319
Fam111a	-1.40973	1.71896	-5.28502	9.61e-06	7.89e-05	3.1215
Rad54l	-1.21933	2.96352	-5.27591	9.87e-06	8.09e-05	3.04657
Tnfrsf12a	-1.63989	3.57689	-5.27551	9.88e-06	8.09e-05	3.0612
Ap2m1	0.69878	9.85591	5.27513	9.89e-06	8.1e-05	2.57025
Qk	-0.604695	10.402	-5.27339	9.94e-06	8.13e-05	2.56471
Fasn	0.846968	8.16397	5.27142	1e-05	8.17e-05	2.57616
Syp	1.20555	8.75491	5.27128	1e-05	8.17e-05	2.56743
Gnai2	-0.719037	9.3497	-5.27028	1e-05	8.19e-05	2.5595
Ankrd66	-1.599	1.27443	-5.27024	1e-05	8.19e-05	3.25273
Ppp1r35	0.773341	4.69528	5.26923	1.01e-05	8.21e-05	2.78861
Ldoc1l	0.652518	5.60104	5.26409	1.02e-05	8.33e-05	2.62831
Galnt16	-0.644502	6.87932	-5.26352	1.02e-05	8.33e-05	2.59002
Cldn19	-1.72544	2.2348	-5.26147	1.03e-05	8.38e-05	3.12916
Rasl10b	0.801786	7.84339	5.2593	1.03e-05	8.43e-05	2.54693
Iqcd	-1.56926	0.767446	-5.25897	1.04e-05	8.43e-05	3.23271
Cd82	-1.34744	2.47863	-5.25699	1.04e-05	8.47e-05	3.06708
Zfp185	-1.96901	1.57364	-5.25586	1.05e-05	8.5e-05	3.19604
Cnnm4	0.969776	3.32959	5.25527	1.05e-05	8.5e-05	2.98502
Limk1	0.657472	6.48273	5.25446	1.05e-05	8.52e-05	2.56246
Dpysl5	0.727789	9.25578	5.25335	1.05e-05	8.54e-05	2.51177
Galm	-1.43446	2.74293	-5.25263	1.05e-05	8.55e-05	3.03997
Pla1a	-1.47028	-0.323218	-5.24931	1.06e-05	8.63e-05	3.22178
Ebp	0.686509	4.90969	5.24898	1.07e-05	8.63e-05	2.69323
Mapk10	0.676254	8.04027	5.24847	1.07e-05	8.64e-05	2.52059
Lyn	-1.88383	1.41067	-5.24766	1.07e-05	8.65e-05	3.12027
Slc30a3	1.4787	3.50768	5.24763	1.07e-05	8.65e-05	2.82767
Pnpla6	0.675339	6.20248	5.2448	1.08e-05	8.72e-05	2.54665
Cdo1	0.805313	6.37723	5.24248	1.09e-05	8.77e-05	2.53955
Cndp2	-0.61222	6.37026	-5.24232	1.09e-05	8.77e-05	2.53646
Adamts7	-0.901373	3.36163	-5.24138	1.09e-05	8.79e-05	2.86799
Aldh1a3	1.36344	3.78909	5.23899	1.1e-05	8.84e-05	2.80462
Ptbp3	-0.912843	4.87556	-5.23876	1.1e-05	8.84e-05	2.67385
Cyp46a1	0.625957	6.61923	5.2386	1.1e-05	8.84e-05	2.55513
Eif2ak2	-1.22094	2.64805	-5.23858	1.1e-05	8.84e-05	3.01414
Frmd6	-1.12634	2.44936	-5.23745	1.1e-05	8.86e-05	3.01948
Mfsd9	0.876111	3.3782	5.23666	1.1e-05	8.88e-05	2.84701
Syt12	-1.07278	2.35766	-5.23582	1.11e-05	8.9e-05	3.00633
Net1	-1.0281	4.75905	-5.23329	1.11e-05	8.96e-05	2.67627
1700009C05Rik	1.41683	-0.0116597	5.22797	1.13e-05	9.08e-05	3.15445
Svep1	-1.67992	0.854025	-5.22795	1.13e-05	9.08e-05	3.08654
Cep128	-1.26932	3.37959	-5.22647	1.14e-05	9.12e-05	2.88081
Cd59a	-1.18684	3.08672	-5.22514	1.14e-05	9.15e-05	2.99963
Csf3r	-1.35344	-0.0873048	-5.22368	1.15e-05	9.18e-05	3.15334
Efhd1	0.997083	3.94299	5.2234	1.15e-05	9.18e-05	2.83415
Arap3	-1.51651	0.0223409	-5.22318	1.15e-05	9.18e-05	3.13317
Fzd9	0.912774	3.22605	5.22055	1.16e-05	9.25e-05	2.77041
Itgal	-1.60525	0.202354	-5.22034	1.16e-05	9.25e-05	3.1289
Gm17202	1.236	-0.426816	5.2181	1.16e-05	9.3e-05	3.14451
Tk1	-1.40069	2.39842	-5.21804	1.16e-05	9.3e-05	2.91743
Ephb4	-1.20646	2.69167	-5.21596	1.17e-05	9.35e-05	2.9386
Asb1	0.747934	5.87433	5.21211	1.18e-05	9.45e-05	2.47541
Adgrg6	-1.42663	2.31403	-5.21165	1.19e-05	9.45e-05	3.01883
Ercc6l	-1.2342	1.12694	-5.21154	1.19e-05	9.45e-05	2.99555
Arid3b	-1.18548	2.10973	-5.20794	1.2e-05	9.54e-05	2.94654
Poldip2	-0.672795	7.50827	-5.20557	1.21e-05	9.6e-05	2.41083
Fam122b	-0.901188	3.86756	-5.20527	1.21e-05	9.61e-05	2.74368
Shisa7	0.781604	6.45732	5.20493	1.21e-05	9.61e-05	2.44619
Tmie	0.986037	3.68946	5.20344	1.21e-05	9.65e-05	2.74157
Ttll1	0.842535	7.36388	5.20194	1.22e-05	9.68e-05	2.40316
Mag	-1.51661	4.13221	-5.20133	1.22e-05	9.69e-05	2.71703
Calm1	0.827866	11.0825	5.19889	1.23e-05	9.76e-05	2.34116
Tacr3	1.36173	1.16129	5.19821	1.23e-05	9.77e-05	3.00507
Rab3b	1.05834	7.38117	5.1981	1.23e-05	9.77e-05	2.38035
Aldh1a1	-1.63622	3.49821	-5.19764	1.23e-05	9.78e-05	2.87495
Ccdc8	-1.03758	3.05148	-5.19714	1.24e-05	9.78e-05	2.76797
Eaf1	-0.663176	4.88455	-5.19553	1.24e-05	9.82e-05	2.56284
Sh3bgrl3	0.761875	7.66189	5.19401	1.25e-05	9.86e-05	2.36621
Sft2d2	-1.01159	5.67817	-5.194	1.25e-05	9.86e-05	2.54273
Sbf1	0.55042	7.47301	5.19194	1.25e-05	9.91e-05	2.35736
Chac1	0.91244	3.64692	5.19151	1.26e-05	9.91e-05	2.67975
Trim3	0.682509	6.642	5.19146	1.26e-05	9.91e-05	2.39126
Cep192	-0.968941	3.7314	-5.19038	1.26e-05	9.94e-05	2.70849
Rwdd2a	1.10114	3.38052	5.18977	1.26e-05	9.95e-05	2.70142
Coro1a	1.04055	6.09791	5.18599	1.28e-05	0.000100514	2.36329
Gm38562	-1.81493	2.23817	-5.18319	1.29e-05	0.000101268	2.9469
S1pr1	-0.698251	7.57477	-5.18289	1.29e-05	0.000101298	2.34024
Tspyl3	0.922075	4.9343	5.18245	1.29e-05	0.000101356	2.5018
Tlcd1	0.922336	4.54252	5.18231	1.29e-05	0.000101356	2.54257
Pgm1	-0.89605	3.93729	-5.18057	1.3e-05	0.000101806	2.66451
Olfr111	-1.49398	-0.343656	-5.17933	1.3e-05	0.000102113	3.02243
Gbp5	-1.479	0.605474	-5.17484	1.32e-05	0.000103377	3.01057
Tshz3	1.04525	4.49497	5.17402	1.32e-05	0.000103564	2.49754
Gnptab	0.608514	6.79025	5.17209	1.33e-05	0.000104065	2.33293
Skap2	-1.62229	3.63092	-5.17195	1.33e-05	0.000104065	2.69413
Ntsr1	1.40551	2.32788	5.17161	1.33e-05	0.00010411	2.76679
Srl	-0.784331	5.08506	-5.16681	1.35e-05	0.000105493	2.37105
Rgs16	-0.93767	3.96481	-5.16595	1.35e-05	0.000105694	2.62887
Msln	1.27975	1.44934	5.16511	1.36e-05	0.000105891	2.85195
Neurod6	1.17851	5.23419	5.1638	1.36e-05	0.00010623	2.39802
Tlr1	-1.35005	-0.458288	-5.16221	1.37e-05	0.00010664	2.98196
Plppr2	0.823327	8.48699	5.16208	1.37e-05	0.00010664	2.25709
Gm15698	-2.67349	0.261844	-5.16069	1.37e-05	0.000107005	2.94132
Rab8b	-0.891424	5.56115	-5.16013	1.37e-05	0.000107121	2.38908
Kcnd1	0.806053	4.27871	5.15839	1.38e-05	0.000107597	2.5327
Stambp	0.683877	5.48875	5.15804	1.38e-05	0.000107644	2.3822
Rnf208	0.938125	6.60565	5.15738	1.39e-05	0.000107779	2.29766
Lrp11	0.935819	3.83283	5.15723	1.39e-05	0.000107779	2.55632
Havcr2	-1.58194	-0.115195	-5.15494	1.4e-05	0.000108427	2.9554
Ctsa	-0.766379	7.20316	-5.15289	1.4e-05	0.000109008	2.27519
Napb	0.841675	7.59263	5.15134	1.41e-05	0.000109432	2.24444
Pcdh1	0.730292	7.36978	5.1494	1.42e-05	0.000109982	2.24403
Rfc1	-0.634699	5.60454	-5.14921	1.42e-05	0.000109982	2.35569
1700037H04Rik	0.830235	4.64701	5.14856	1.42e-05	0.000110129	2.43858
Gmip	0.915729	3.40208	5.14444	1.44e-05	0.000111375	2.51885
Pfkp	0.817781	7.08162	5.14395	1.44e-05	0.000111383	2.25176
Dlx2	-0.738666	5.85234	-5.14385	1.44e-05	0.000111383	2.31283
Cdh22	0.831954	4.8572	5.14385	1.44e-05	0.000111383	2.38452
Dbn1	0.646969	9.23594	5.14232	1.45e-05	0.000111812	2.19824
Fntb	0.659118	5.90074	5.14177	1.45e-05	0.000111884	2.29026
Man2b2	-1.16761	5.36388	-5.14172	1.45e-05	0.000111884	2.42207
Gm1673	0.764792	6.54232	5.14027	1.45e-05	0.000112286	2.254
Thy1	0.806348	9.0012	5.13962	1.46e-05	0.000112434	2.19058
Napg	0.712545	6.57688	5.13916	1.46e-05	0.000112522	2.2378
Znhit1	0.902244	5.20207	5.13793	1.46e-05	0.00011286	2.34324
Fam134a	0.722733	6.97856	5.13744	1.47e-05	0.000112944	2.23771
Nrg2	-0.869531	3.80545	-5.13729	1.47e-05	0.000112944	2.60038
Fbn1	-1.74418	3.64545	-5.13623	1.47e-05	0.000113228	2.57299
Trim14	-1.40613	-0.0699499	-5.13388	1.48e-05	0.000113931	2.89824
Fam217b	0.703578	4.89138	5.13325	1.48e-05	0.000114075	2.37142
2010107G23Rik	0.806634	4.78426	5.13169	1.49e-05	0.000114523	2.33539
H13	0.674918	7.22198	5.13122	1.49e-05	0.000114619	2.2055
Mgst1	-1.29969	5.46055	-5.13076	1.5e-05	0.000114706	2.36713
Spag5	-0.965574	2.90828	-5.1274	1.51e-05	0.000115754	2.62766
Spc24	-0.713374	4.35969	-5.12355	1.53e-05	0.000116975	2.38943
Syndig1	1.083	5.10134	5.12295	1.53e-05	0.000117113	2.27111
Ccdc124	0.770966	7.26796	5.11924	1.55e-05	0.000118298	2.16796
Med9os	-1.39485	2.08253	-5.11879	1.55e-05	0.000118337	2.75878
Crlf2	1.00399	4.94229	5.11875	1.55e-05	0.000118337	2.33229
BC037034	0.789935	6.89644	5.11695	1.56e-05	0.00011883	2.16321
4930522L14Rik	-1.73055	0.895679	-5.11693	1.56e-05	0.00011883	2.81024
S100a6	-1.64496	1.92408	-5.11587	1.56e-05	0.000119128	2.75368
Atl3	-0.794492	5.90521	-5.11497	1.56e-05	0.000119373	2.21415
Gpd1l	0.730587	7.0844	5.11421	1.57e-05	0.000119568	2.14968
Cacnb3	0.651025	7.0261	5.11398	1.57e-05	0.000119584	2.14834
Tnfrsf11b	-1.56142	-0.292424	-5.11236	1.58e-05	0.000120074	2.834
Hunk	-0.788336	4.39323	-5.11075	1.58e-05	0.000120564	2.314
Ak4	1.32938	0.893627	5.11009	1.59e-05	0.000120729	2.76803
Cldn10	1.23063	4.39592	5.10869	1.59e-05	0.000121151	2.48396
Gm5113	0.65383	4.64253	5.10728	1.6e-05	0.000121574	2.3035
Cetn4	-1.64098	3.68113	-5.10681	1.6e-05	0.000121673	2.57628
3830406C13Rik	0.561609	5.3361	5.10499	1.61e-05	0.000122244	2.23782
Pja1	0.695259	8.65708	5.10439	1.61e-05	0.000122389	2.09668
Dlgap3	0.793748	6.98771	5.10381	1.62e-05	0.00012253	2.12161
P4ha2	1.02692	3.71435	5.10248	1.62e-05	0.00012293	2.40855
Chac2	0.907544	4.52552	5.101	1.63e-05	0.000123386	2.32421
Tns1	-1.41716	4.01642	-5.10056	1.63e-05	0.000123478	2.44113
Gm19522	-1.47024	0.755129	-5.09926	1.64e-05	0.000123812	2.79103
Hdac6	0.589159	5.30524	5.09924	1.64e-05	0.000123812	2.20989
Ddx3x	-0.685031	8.91732	-5.09895	1.64e-05	0.000123853	2.08103
Elmsan1	-0.812276	5.26195	-5.09447	1.66e-05	0.000125323	2.25079
Tomm40	0.588862	6.61238	5.09429	1.66e-05	0.000125323	2.14036
Cenpa	-0.86264	4.23211	-5.09427	1.66e-05	0.000125323	2.37553
Aurka	-0.957866	3.95444	-5.09291	1.67e-05	0.000125746	2.35478
Fam124a	0.594143	7.1847	5.09267	1.67e-05	0.000125764	2.07959
Enpp1	-1.21488	1.50042	-5.09221	1.67e-05	0.000125866	2.69892
Prkcg	1.00734	6.81864	5.09044	1.68e-05	0.00012644	2.08113
Ripk1	-1.36517	3.32162	-5.08932	1.68e-05	0.00012668	2.55622
Zfp853	1.13953	2.34319	5.08924	1.68e-05	0.00012668	2.58307
Gucy1a3	0.730456	7.82497	5.08922	1.68e-05	0.00012668	2.05975
Oat	-0.679602	8.07295	-5.08768	1.69e-05	0.000127174	2.06692
Ggh	-0.829557	5.9138	-5.08709	1.69e-05	0.000127322	2.19499
Ndrg1	0.902228	6.25483	5.08657	1.7e-05	0.000127445	2.08949
Txnrd1	-0.781395	8.39379	-5.08578	1.7e-05	0.000127668	2.05791
Sox6	-0.672874	7.32563	-5.08405	1.71e-05	0.000128216	2.06776
Myrip	1.17712	2.75475	5.08391	1.71e-05	0.000128216	2.49462
Pde1a	0.969585	5.86207	5.08272	1.72e-05	0.000128589	2.1098
Gucd1	0.701254	3.80431	5.08102	1.72e-05	0.000129114	2.29528
Rpa2	-0.762695	4.65171	-5.08093	1.72e-05	0.000129114	2.24497
Syn3	0.852778	6.4023	5.07904	1.73e-05	0.000129744	2.06329
Ampd3	-0.938594	4.31532	-5.07843	1.74e-05	0.000129904	2.36198
Dok1	-1.47579	1.67865	-5.07767	1.74e-05	0.000130118	2.6501
Lama5	-2.03798	3.80675	-5.07705	1.74e-05	0.000130274	2.51917
Arsk	-0.948478	5.09469	-5.07689	1.74e-05	0.000130274	2.29107
Rreb1	-1.22448	4.15443	-5.07336	1.76e-05	0.00013153	2.32788
Tpcn2	-1.42463	2.28776	-5.07302	1.76e-05	0.000131588	2.58712
BC029214	0.750358	4.65869	5.07157	1.77e-05	0.000132046	2.19672
Taok2	0.621064	7.83675	5.07144	1.77e-05	0.000132046	2.01451
Zdhhc24	0.716134	3.93834	5.0685	1.79e-05	0.000133087	2.27096
Mpp2	0.662284	5.34477	5.06833	1.79e-05	0.000133087	2.11216
Cdc42bpg	-1.36045	4.2194	-5.06772	1.79e-05	0.000133254	2.3316
Slc25a24	-1.51156	1.3204	-5.06372	1.81e-05	0.000134715	2.60879
Htr1f	1.45683	0.790793	5.06226	1.82e-05	0.000135208	2.61932
Mastl	-1.00724	3.04531	-5.06135	1.82e-05	0.000135493	2.41671
Acadvl	-0.654652	6.61773	-5.06094	1.83e-05	0.000135569	2.05871
Hps5	-0.765762	4.6841	-5.06058	1.83e-05	0.000135569	2.24855
Ubald1	0.600154	7.0763	5.06041	1.83e-05	0.000135569	2.00108
AI593442	1.44061	1.00777	5.06039	1.83e-05	0.000135569	2.58879
Tor3a	-1.07207	3.48042	-5.06008	1.83e-05	0.000135569	2.46363
Prune	0.664499	6.44558	5.06007	1.83e-05	0.000135569	2.02929
Ralyl	0.850708	6.62759	5.05947	1.83e-05	0.00013573	2.01195
Usp22	0.749751	9.86405	5.05906	1.84e-05	0.000135819	1.9517
Cdca2	-1.16977	3.04114	-5.05712	1.85e-05	0.000136507	2.40414
Tmc6	-1.31729	1.55323	-5.0564	1.85e-05	0.000136716	2.60323
Bora	-1.11898	2.18382	-5.05571	1.85e-05	0.000136917	2.4891
Ndn	0.876202	6.79698	5.0548	1.86e-05	0.000137202	2.004
Zdhhc22	1.22407	2.57497	5.05454	1.86e-05	0.000137235	2.45697
Shroom1	1.34171	0.529167	5.05429	1.86e-05	0.000137263	2.61683
Apobr	-1.38903	0.862517	-5.05253	1.87e-05	0.000137886	2.61777
Abhd11	0.648712	5.37126	5.05161	1.88e-05	0.000138175	2.10796
Tmcc2	0.760281	7.47017	5.05097	1.88e-05	0.00013836	1.96394
Tmem87a	-1.10497	5.48544	-5.04949	1.89e-05	0.000138832	2.11556
Rap1gap	0.728783	5.95896	5.04942	1.89e-05	0.000138832	2.03329
Gjd3	1.32226	1.23157	5.04623	1.9e-05	0.00014003	2.56032
4932443I19Rik	-1.60941	2.27429	-5.04584	1.91e-05	0.000140115	2.5618
Cxcl5	-1.50311	0.483219	-5.04464	1.91e-05	0.000140507	2.60781
Pcdh19	0.789493	6.30791	5.04451	1.91e-05	0.000140507	1.96505
Bbx	-1.01352	5.36241	-5.04411	1.92e-05	0.000140594	2.1337
Smpdl3b	-1.59569	2.40662	-5.04306	1.92e-05	0.000140948	2.52568
Eml2	0.956701	6.20215	5.04236	1.93e-05	0.000141159	1.97198
Slc22a23	-0.586807	6.96841	-5.04164	1.93e-05	0.00014137	1.94772
Foxo6	0.826702	4.93453	5.04148	1.93e-05	0.00014137	2.05619
5033430I15Rik	1.20941	0.669589	5.04099	1.93e-05	0.000141494	2.58744
Aard	-1.55483	1.27524	-5.04036	1.94e-05	0.000141677	2.5934
Arhgap19	-0.949644	3.06878	-5.03989	1.94e-05	0.000141796	2.34263
Cdk5	0.685382	6.85584	5.037	1.96e-05	0.000142902	1.94752
Kcng1	1.08587	4.90889	5.03119	1.99e-05	0.00014522	1.98809
Myrf	-1.28866	3.32823	-5.03043	1.99e-05	0.000145463	2.26659
Egr4	-1.30729	2.35568	-5.02953	2e-05	0.000145763	2.42292
Trim68	-1.26569	1.67848	-5.02816	2.01e-05	0.000146262	2.49381
Ss18l1	0.527077	6.90187	5.0273	2.01e-05	0.000146549	1.90732
Naip2	-1.52134	0.42749	-5.02592	2.02e-05	0.000147053	2.57561
Sbk1	0.721377	7.42057	5.02354	2.03e-05	0.000147983	1.88738
Reep3	-0.855723	5.35295	-5.02272	2.04e-05	0.000148202	2.0494
Vps37b	-0.596084	6.60428	-5.02267	2.04e-05	0.000148202	1.91741
Celsr1	-1.46093	4.88029	-5.02212	2.04e-05	0.00014836	2.0789
5730409E04Rik	1.29047	3.05014	5.02147	2.04e-05	0.000148521	2.263
Prmt2	0.614873	7.24498	5.02138	2.04e-05	0.000148521	1.88903
Ntn4	-0.872488	6.27478	-5.0207	2.05e-05	0.000148735	1.9864
Wdr13	0.756488	4.94059	5.01965	2.05e-05	0.000149107	1.9764
Lats2	-1.03582	5.4926	-5.01888	2.06e-05	0.00014936	2.02874
Sgsm1	1.02873	4.61031	5.01765	2.07e-05	0.000149811	2.0677
Aurkb	-0.953702	3.79608	-5.01391	2.09e-05	0.000151348	2.14209
Nmi	-1.47693	1.81751	-5.01327	2.09e-05	0.000151547	2.48981
Mme	-1.09418	3.32394	-5.01293	2.09e-05	0.000151585	2.27223
Pafah1b3	0.667607	7.1556	5.01283	2.1e-05	0.000151585	1.85956
Smad5	-0.667277	6.8454	-5.00735	2.13e-05	0.000153902	1.86814
Coq10b	-0.983259	5.02678	-5.00648	2.13e-05	0.000154117	2.04881
Mest	-0.777661	7.90877	-5.00647	2.13e-05	0.000154117	1.84793
Vrk1	-0.768883	5.15207	-5.00633	2.13e-05	0.000154117	2.00901
Adcyap1	1.3456	3.51174	5.00589	2.14e-05	0.000154235	2.06816
Birc5	-0.910753	4.64805	-5.00511	2.14e-05	0.000154502	2.0174
Cxxc5	-0.687543	6.2454	-5.00285	2.16e-05	0.000155427	1.90281
Fnip1	-0.860935	6.00459	-5.00247	2.16e-05	0.000155518	1.90546
Tecpr2	0.6962	5.02946	5.00074	2.17e-05	0.000156209	1.96407
Usp40	-0.992977	4.56101	-4.99883	2.18e-05	0.000156986	2.03769
Prtg	-1.71096	1.37758	-4.99579	2.2e-05	0.000158278	2.47308
Syt5	0.924359	7.75696	4.99204	2.22e-05	0.000159896	1.80136
Folr1	-1.46428	1.86355	-4.99188	2.22e-05	0.000159896	2.37038
[truncated: 12,364 more rows]

## Sheet: SLCs_basal (2)
List of SLCs change in KO PCCs at basal condition.
Gene	logFC	AveExpr	t	P.Value	adj.P.Val	B
Slc10a4	1.34238	1.01009	4.74203	4.54e-05	0.00028862	1.74872
Slc10a7	-0.372359	0.966308	-1.25321	0.219544	0.327322	-6.09843
Slc11a1	-3.20872	1.8775	-8.0423	4.58e-09	1.28e-07	10.781
Slc11a2	0.0616822	6.4859	0.552882	0.584329	0.687147	-7.40641
Slc12a2	-0.713508	6.48206	-4.164	0.000232779	0.0011352	-0.464636
Slc12a4	-0.987166	3.78235	-5.86365	1.84e-06	2.03e-05	4.61529
Slc12a5	0.984091	7.15236	6.84946	1.15e-07	1.96e-06	7.063
Slc12a7	-2.12144	4.39973	-9.59154	9.02e-11	4.75e-09	14.5265
Slc12a8	-0.149204	0.155452	-0.474433	0.638532	0.732067	-6.65611
Slc12a9	0.154943	3.17088	0.782392	0.439948	0.557879	-6.82896
Slc13a3	-0.311583	3.74701	-1.22562	0.229615	0.338542	-6.39599
Slc13a4	-2.42369	-0.0970013	-9.70234	6.9e-11	3.77e-09	14.9024
Slc13a5	0.580657	1.62372	2.96762	0.00575539	0.016804	-3.00197
Slc14a1	-0.756119	1.88699	-2.77452	0.00930149	0.0252053	-3.5012
Slc14a2	-1.42277	1.6835	-6.52649	2.83e-07	4.21e-06	6.64805
Slc15a1	-0.290119	0.383783	-1.03724	0.307686	0.425762	-6.25823
Slc15a2	-0.428511	4.78728	-2.98848	0.0054601	0.0160857	-3.28564
Slc15a3	-3.2649	1.59373	-8.74146	7.48e-10	2.84e-08	12.55
Slc15a4	-0.0631332	3.74759	-0.373909	0.711029	0.793469	-7.18067
Slc16a1	-1.50844	6.57706	-8.97067	4.19e-10	1.74e-08	12.8039
Slc16a10	-0.599985	0.974139	-1.75323	0.0894949	0.159959	-5.33587
Slc16a12	-1.60264	1.09826	-5.74065	2.61e-06	2.69e-05	4.55435
Slc16a13	0.401192	2.73032	1.87494	0.0702951	0.131558	-5.43096
Slc16a14	0.769097	4.65588	5.38521	7.22e-06	6.29e-05	3.06496
Slc16a2	0.906725	7.68581	5.90843	1.62e-06	1.83e-05	4.39963
Slc16a3	2.03419	2.863	7.58229	1.56e-08	3.62e-07	9.36479
Slc16a4	-3.45792	1.92084	-10.4894	1.07e-11	7.8e-10	16.7286
Slc16a6	-0.332043	4.6809	-2.29663	0.0285921	0.0630492	-4.88723
Slc16a7	0.493717	5.81538	2.83914	0.00793323	0.0220424	-3.84502
Slc16a9	-0.78636	3.01871	-3.11076	0.00399828	0.0124347	-2.74863
Slc17a5	-0.114995	3.72375	-0.614867	0.543151	0.651799	-6.95918
Slc17a6	0.833558	4.96517	3.90694	0.000475676	0.00205155	-1.06822
Slc17a7	1.52003	7.54674	5.50549	5.12e-06	4.69e-05	3.25148
Slc17a8	0.199728	2.22994	0.816725	0.420348	0.539358	-6.63675
Slc18a2	-0.578097	0.269989	-2.1954	0.0357852	0.0760033	-4.51171
Slc18a3	0.0743015	0.426835	0.260176	0.796457	0.858247	-6.769
Slc18b1	0.195564	5.24567	1.06978	0.293019	0.410329	-6.81177
Slc19a1	-0.346701	5.1786	-2.29577	0.0286473	0.0631418	-4.96465
Slc19a2	-0.103164	4.60216	-0.606452	0.548652	0.65627	-7.16669
Slc19a3	0.306258	-0.292848	0.992323	0.32876	0.447718	-6.22293
Slc1a2	-0.361712	8.98167	-1.98673	0.0558952	0.109608	-5.71032
Slc1a3	-0.533133	10.3132	-3.20881	0.00310364	0.010062	-3.06393
Slc1a4	0.522017	7.06489	2.97935	0.00558759	0.0163773	-3.58747
Slc1a5	-0.437103	2.13091	-1.9054	0.0660854	0.125495	-5.26614
Slc1a6	0.649402	2.91868	3.3172	0.00233786	0.00790591	-2.32602
Slc20a1	0.0816776	7.01868	0.701861	0.488027	0.602255	-7.33508
Slc20a2	-0.0721022	6.52716	-0.412846	0.682575	0.769054	-7.46351
Slc22a12	-0.211371	0.144069	-0.716241	0.47923	0.594207	-6.50836
Slc22a15	0.209743	2.47391	0.989464	0.330133	0.448824	-6.56452
Slc22a17	0.650745	9.53456	5.95322	1.43e-06	1.65e-05	4.50964
Slc22a18	-0.421847	-0.210944	-1.40815	0.169086	0.265255	-5.76327
Slc22a23	-0.586807	6.96841	-5.04164	1.93e-05	0.00014137	1.94772
Slc22a3	0.397781	1.89721	1.37938	0.177696	0.27578	-6.10871
Slc22a4	-1.50802	2.11455	-4.58112	7.18e-05	0.000429939	1.20412
Slc22a5	-0.694218	4.41105	-4.06962	0.000302964	0.00141686	-0.479469
Slc22a8	-1.97095	0.472706	-6.76838	1.44e-07	2.38e-06	7.39889
Slc23a2	-0.554397	6.0351	-2.34942	0.0253843	0.0571068	-4.93438
Slc24a2	0.47551	3.30503	2.60263	0.0140896	0.0353583	-4.10263
Slc24a3	0.23037	6.52852	1.42658	0.163744	0.258575	-6.55996
Slc24a4	-3.34283	3.2445	-7.41156	2.47e-08	5.35e-07	9.08251
Slc24a5	-2.76962	0.0733547	-11.1887	2.18e-12	2.11e-10	18.2516
Slc25a1	1.02525	7.06196	8.18311	3.16e-09	9.42e-08	10.7014
Slc25a10	-0.432877	4.24398	-2.07087	0.0468263	0.094826	-5.2605
Slc25a11	0.231711	6.75375	1.647	0.109708	0.188439	-6.23825
Slc25a12	0.682659	6.31205	4.31649	0.000151705	0.000797213	-0.0610812
Slc25a13	-1.05718	1.80848	-3.61713	0.00105028	0.00401708	-1.34921
Slc25a14	0.0704665	5.63818	0.463781	0.64606	0.738163	-7.40191
Slc25a15	-0.640642	4.565	-4.1349	0.000252513	0.00121453	-0.344915
Slc25a16	0.0189544	3.92432	0.12591	0.90062	0.932433	-7.28451
Slc25a17	-0.136213	6.3284	-1.32008	0.19652	0.298935	-6.66152
Slc25a18	-0.268993	6.01305	-1.72444	0.0946358	0.167632	-6.03025
Slc25a19	0.366076	5.15242	3.09347	0.0041796	0.0129008	-3.17205
Slc25a2	-0.794637	0.414625	-2.25669	0.0312583	0.0678863	-4.36718
Slc25a20	-0.607814	4.91749	-3.53005	0.00132793	0.00490397	-1.98548
Slc25a21	-1.21546	0.343656	-3.83109	0.000586153	0.00245004	-0.672811
Slc25a22	1.18948	7.90703	7.14143	5.15e-08	9.87e-07	7.86237
Slc25a23	-0.432588	7.51001	-1.63555	0.112098	0.191707	-6.29625
Slc25a24	-1.51156	1.3204	-5.06372	1.81e-05	0.000134715	2.60879
Slc25a25	0.434218	4.17901	2.02487	0.0516092	0.102689	-5.32612
Slc25a26	0.423045	4.02661	2.7222	0.0105682	0.0281097	-3.8795
Slc25a27	0.293923	5.55582	1.89086	0.0680663	0.128374	-5.72757
Slc25a28	0.551045	3.9342	2.59757	0.0142605	0.0357185	-4.14537
Slc25a29	0.658676	3.79496	4.32916	0.000146385	0.000774072	0.165613
Slc25a3	-0.0291703	9.0132	-0.22505	0.823424	0.877692	-7.59402
Slc25a30	-0.0901709	4.93285	-0.695771	0.491781	0.605695	-7.19964
Slc25a32	0.331088	3.29818	1.9323	0.0625497	0.119874	-5.32814
Slc25a33	-0.228898	2.63445	-0.832552	0.411496	0.530751	-6.66485
Slc25a34	0.349617	-0.0734911	1.10495	0.277725	0.392858	-6.09874
Slc25a35	-0.561251	0.854879	-1.76957	0.0866835	0.155989	-5.328
Slc25a37	-0.464604	0.455004	-1.77532	0.0857118	0.154663	-5.25664
Slc25a38	-0.021615	4.60339	-0.13821	0.890972	0.92578	-7.38656
Slc25a39	0.119408	7.38793	0.989926	0.329911	0.448649	-7.08274
Slc25a4	0.253432	10.0991	2.22438	0.033576	0.0720805	-5.2723
Slc25a40	-0.277367	3.63941	-1.56391	0.128038	0.212785	-5.96378
Slc25a42	0.458057	3.34397	2.45919	0.0197365	0.0466057	-4.31715
Slc25a44	0.177282	7.14536	1.54899	0.131582	0.217867	-6.40459
Slc25a45	-1.58624	1.28446	-5.60471	3.85e-06	3.7e-05	4.15279
Slc25a46	-0.169047	5.98896	-1.07722	0.289734	0.406642	-6.942
Slc25a48	-1.47476	-0.273692	-4.96917	2.37e-05	0.000168814	2.44071
Slc25a51	0.130701	6.51662	0.966297	0.34141	0.460623	-7.08075
Slc25a53	0.0659494	3.04515	0.392797	0.697171	0.781637	-7.05433
Slc26a1	0.577672	1.19655	2.0005	0.054314	0.107033	-4.97602
Slc26a10	0.39814	-0.158866	1.24762	0.221559	0.329949	-5.94362
Slc26a11	-0.266134	2.56086	-1.16894	0.25138	0.36376	-6.28416
Slc26a2	-0.219835	2.81679	-1.2063	0.236873	0.346503	-6.38406
Slc26a6	-0.0221936	3.45967	-0.112621	0.911061	0.939585	-7.1819
Slc26a7	0.748849	0.739401	2.3238	0.0268983	0.0599121	-4.28082
Slc26a8	-0.000840258	1.33849	-0.00342447	0.99729	0.998472	-6.90212
Slc27a1	0.230139	6.96459	1.52331	0.137866	0.226186	-6.41643
Slc27a2	0.0946362	0.779939	0.34499	0.732443	0.810115	-6.75941
Slc27a3	1.59618	3.78198	10.4334	1.22e-11	8.45e-10	16.4958
Slc27a4	0.63811	7.89014	3.6831	0.000878284	0.00346167	-1.82336
Slc27a5	-0.0318616	-0.214187	-0.114753	0.909385	0.93853	-6.7005
Slc27a6	0.716786	-0.327657	2.1225	0.0419271	0.0867036	-4.5874
Slc29a1	0.127979	2.58444	0.567956	0.574175	0.678224	-6.91501
Slc29a2	0.663623	4.71194	5.71378	2.82e-06	2.86e-05	4.02193
Slc29a3	-0.250467	5.21391	-1.97981	0.0567056	0.110758	-5.58683
Slc29a4	0.759209	5.56103	4.79697	3.88e-05	0.000254632	1.31201
Slc2a1	0.225124	6.43599	1.29835	0.20379	0.308022	-6.6796
Slc2a10	-1.10039	1.52242	-3.92159	0.000456823	0.00198765	-0.49029
Slc2a12	-0.368794	1.38182	-1.19721	0.240344	0.350545	-6.13125
Slc2a13	0.708731	5.49505	4.32647	0.000147498	0.000778811	0.0356584
Slc2a2	0.119156	-0.176146	0.465152	0.64509	0.737289	-6.59753
Slc2a3	0.847059	7.02986	4.82683	3.56e-05	0.0002371	1.33715
Slc2a4	-1.66822	2.79874	-8.00053	5.11e-09	1.42e-07	10.5974
Slc2a4rg-ps	-0.110856	0.745433	-0.340457	0.73582	0.812933	-6.7778
Slc2a6	0.983906	4.14261	4.94174	2.57e-05	0.000180915	1.8279
Slc2a8	0.124772	4.40629	0.926913	0.361167	0.480953	-6.92858
Slc2a9	-1.83668	0.910895	-6.1625	7.89e-07	1e-05	5.74655
Slc30a1	0.0353566	3.12946	0.136917	0.891986	0.926373	-7.02011
Slc30a10	1.121	1.96116	4.1793	0.000223015	0.00110054	0.0972295
Slc30a3	1.4787	3.50768	5.24763	1.07e-05	8.65e-05	2.82767
Slc30a4	0.13556	5.9303	0.982588	0.333454	0.452135	-7.01637
Slc30a5	-0.10912	5.78791	-0.896765	0.376789	0.496782	-7.06701
Slc30a6	0.292801	4.18252	1.76807	0.086939	0.156351	-5.75555
Slc30a7	-0.425656	5.0574	-2.89153	0.00696509	0.0198045	-3.63133
Slc30a9	-0.0279968	6.42851	-0.216695	0.829873	0.882534	-7.54272
Slc31a1	0.0209009	7.09729	0.220925	0.826607	0.880365	-7.56035
Slc31a2	0.000930445	2.8783	0.00473204	0.996255	0.997922	-7.09989
Slc33a1	-0.0990566	4.86786	-0.744333	0.462308	0.579074	-7.07372
Slc35a1	-0.6207	4.81723	-3.17746	0.00336648	0.0107563	-2.92603
Slc35a2	0.408534	5.99573	3.23672	0.00288616	0.00946371	-2.87799
Slc35a3	-0.57861	2.9528	-2.40894	0.0221616	0.051295	-4.38222
Slc35a4	-0.132323	1.95297	-0.442065	0.661525	0.752243	-6.79577
Slc35a5	-0.130676	6.24184	-0.988131	0.330775	0.449314	-7.03546
Slc35b1	-0.0138635	6.27808	-0.120746	0.904676	0.93535	-7.54002
Slc35b2	-0.190582	5.34646	-1.20922	0.235765	0.345164	-6.72242
Slc35b3	0.437745	3.25033	2.55071	0.0159344	0.0391195	-4.09191
Slc35b4	-0.182749	5.93119	-1.41297	0.167674	0.2635	-6.54631
Slc35c1	0.28424	4.81366	2.22073	0.0338473	0.0725869	-5.11162
Slc35c2	0.491682	4.95024	3.05956	0.00455823	0.0138434	-3.20902
Slc35d1	-1.09355	4.37451	-6.42384	3.78e-07	5.34e-06	6.16982
Slc35d2	-1.14626	0.210344	-3.72225	0.000789517	0.00315763	-0.942335
Slc35e1	0.473242	6.04812	3.27089	0.00263976	0.00879228	-2.81754
Slc35e2	0.51169	6.11703	3.79381	0.000649272	0.00266729	-1.4545
Slc35e4	0.414334	4.94033	2.65935	0.0123018	0.0316686	-4.16174
Slc35f1	0.359997	7.06535	2.9641	0.00580665	0.0169261	-3.61985
Slc35f2	0.710168	3.6493	3.76849	0.00069587	0.00283118	-1.26304
Slc35f3	0.655806	4.27385	3.54403	0.00127901	0.00475748	-1.8547
Slc35f4	0.171251	3.48224	0.937924	0.355569	0.475128	-6.72488
Slc35f5	0.213802	5.05646	1.80849	0.0802877	0.146648	-5.80071
Slc35f6	-0.218963	5.33987	-1.80431	0.080954	0.147602	-5.86384
Slc35g1	-1.57069	1.55805	-6.06812	1.03e-06	1.25e-05	5.39867
Slc35g2	0.430144	2.59991	1.97524	0.0572459	0.111586	-5.10943
Slc36a1	0.731043	4.75594	4.31608	0.000151881	0.000797846	0.0284968
Slc36a2	-1.37833	-0.0213123	-4.21982	0.000199076	0.00100004	0.368958
Slc36a4	0.52882	6.23418	3.90918	0.000472738	0.00204195	-1.17683
Slc37a1	0.61172	1.88629	2.44237	0.0205199	0.0481153	-4.15814
Slc37a2	-2.47853	1.27614	-8.1681	3.29e-09	9.74e-08	11.1079
Slc37a3	0.579904	6.64378	5.54042	4.63e-06	4.32e-05	3.38874
Slc37a4	0.759146	5.05837	5.30213	9.16e-06	7.6e-05	2.77746
Slc38a1	0.299364	7.56087	2.13481	0.0408281	0.0847851	-5.41693
Slc38a10	-6.95659	4.36971	-18.9243	1.56e-18	4.47e-15	32.0247
Slc38a11	-1.03571	0.124771	-3.92549	0.000451928	0.00197102	-0.408405
Slc38a2	-0.189035	7.66598	-1.80952	0.0801228	0.146403	-5.97803
Slc38a3	-0.723203	7.07893	-4.82669	3.57e-05	0.0002371	1.37451
Slc38a6	-0.0632551	3.58149	-0.359115	0.721955	0.80159	-7.13408
Slc38a7	0.462057	4.45446	2.89602	0.00688763	0.019627	-3.57344
Slc38a9	0.0510234	-0.26292	0.135322	0.893236	0.927309	-6.70436
Slc39a1	-0.730811	1.50452	-1.8591	0.0725743	0.135102	-5.23004
Slc39a10	0.00283373	6.4341	0.0183011	0.985516	0.991176	-7.56448
Slc39a11	0.109909	5.23861	0.826	0.415146	0.534307	-7.12448
Slc39a12	-1.93072	5.54837	-9.22623	2.21e-10	1.02e-08	13.5552
Slc39a13	-0.380367	4.87189	-2.89274	0.00694412	0.0197605	-3.61983
Slc39a14	-0.227938	3.93146	-1.39111	0.174144	0.271618	-6.31975
Slc39a3	0.974915	5.88825	6.92628	9.32e-08	1.63e-06	7.31999
Slc39a4	-1.14664	0.862905	-3.55427	0.00124428	0.00464287	-1.37496
Slc39a6	0.410882	5.89323	3.21838	0.00302736	0.00985023	-2.92833
Slc39a8	-1.0736	0.435844	-3.79692	0.000643762	0.00264768	-0.789989
Slc39a9	0.111828	6.21593	1.09586	0.281622	0.397509	-6.93912
Slc3a1	-0.119051	0.07201	-0.300442	0.765855	0.834728	-6.67112
Slc3a2	0.254099	7.48051	1.21225	0.234619	0.344047	-6.85499
Slc40a1	-2.51518	1.71782	-8.63659	9.78e-10	3.56e-08	12.2914
Slc41a1	-0.74495	7.20717	-5.33138	8.42e-06	7.11e-05	2.77611
Slc41a2	0.285219	4.85585	1.80687	0.0805447	0.146986	-5.85458
Slc41a3	0.269542	3.37432	1.22638	0.229336	0.338338	-6.36348
Slc43a1	0.466411	0.271596	1.56423	0.127964	0.212711	-5.5744
Slc43a2	-0.492667	6.74736	-4.37022	0.00013038	0.000706344	0.0787874
Slc43a3	-3.23193	1.71895	-8.77704	6.84e-10	2.63e-08	12.6556
Slc44a1	-0.79207	6.45119	-4.72278	4.8e-05	0.000302112	1.11236
Slc44a2	-0.429997	6.06186	-2.3356	0.026191	0.0586825	-4.93687
Slc44a5	-0.488962	4.25494	-3.08566	0.00426412	0.0131138	-2.97021
Slc45a1	0.920692	5.68227	5.69735	2.96e-06	2.98e-05	3.85852
Slc45a3	-0.648816	0.0372002	-2.41558	0.0218265	0.0506662	-4.02403
Slc45a4	0.330408	5.47896	2.12024	0.0421316	0.0870513	-5.37362
Slc46a1	-0.232537	1.33274	-0.798836	0.430492	0.548747	-6.55499
Slc46a3	-0.660432	1.28054	-2.44826	0.0202422	0.0476119	-4.06378
Slc48a1	-0.136755	6.87148	-1.11903	0.271766	0.386214	-6.93366
Slc4a10	0.711695	4.99098	3.01392	0.00511944	0.0152447	-3.34732
Slc4a11	-0.227088	1.04122	-0.785849	0.43795	0.555738	-6.51536
Slc4a1ap	0.300565	5.33815	1.77136	0.0863798	0.15554	-5.92836
Slc4a2	-0.853157	5.27117	-4.8701	3.15e-05	0.000214732	1.59179
Slc4a3	0.646963	6.15519	4.5407	8.05e-05	0.000473711	0.577378
Slc4a4	-0.428937	7.50225	-1.77416	0.0859078	0.154943	-6.04201
Slc4a5	-0.303751	-0.100378	-0.96572	0.341694	0.460919	-6.32648
Slc4a7	-0.422982	5.14641	-2.78421	0.00908325	0.0247118	-3.90217
Slc4a8	0.519575	6.06911	3.96879	0.000400897	0.0017881	-1.00535
Slc50a1	-0.0930724	3.71558	-0.445931	0.658761	0.749693	-7.06104
Slc52a2	0.427341	4.22305	2.96492	0.00579468	0.0168981	-3.39224
Slc5a5	0.462462	0.918507	1.67274	0.104491	0.181397	-5.51341
Slc5a6	0.599533	4.37062	3.46426	0.00158354	0.00568572	-2.12151
Slc5a7	0.711928	0.469689	2.45194	0.0200706	0.0472936	-4.02598
Slc6a1	0.792008	9.43308	8.28163	2.44e-09	7.62e-08	10.9306
Slc6a11	1.09616	8.03533	8.09438	3.99e-09	1.14e-07	10.4492
Slc6a13	-2.66811	1.48383	-9.77909	5.73e-11	3.25e-09	15.0767
Slc6a15	0.291474	6.79367	2.18535	0.0365808	0.0773974	-5.30041
Slc6a17	1.10023	6.57572	5.70962	2.86e-06	2.89e-05	3.87211
Slc6a19	-1.06436	0.122916	-3.34236	0.00218801	0.00747484	-1.89884
Slc6a3	1.42514	0.207741	4.14352	0.000246503	0.00119041	0.153091
Slc6a6	0.210096	7.50999	1.50568	0.14232	0.232431	-6.48065
Slc6a7	1.5204	4.42833	5.57525	4.19e-06	3.98e-05	3.61856
Slc6a8	-0.154104	7.14201	-0.968462	0.340345	0.45933	-7.10122
Slc6a9	1.03732	5.80008	7.28816	3.45e-08	7.14e-07	8.35888
Slc7a1	0.109556	5.87094	0.849495	0.40215	0.521318	-7.16381
Slc7a10	1.60196	2.36874	6.41295	3.89e-07	5.49e-06	6.31249
Slc7a11	-0.512544	5.06006	-1.88262	0.069212	0.129972	-5.59391
Slc7a14	0.834585	5.2039	4.75522	4.37e-05	0.000280835	1.2663
Slc7a2	-0.601949	3.60068	-2.09757	0.0442326	0.0905974	-5.03411
Slc7a3	1.91996	1.22528	5.40602	6.8e-06	5.99e-05	3.63041
Slc7a4	0.953144	5.0979	6.52071	2.88e-07	4.25e-06	6.26659
Slc7a5	0.698432	8.42696	5.6278	3.61e-06	3.5e-05	3.59342
Slc7a6	-0.316669	5.58686	-2.56308	0.0154757	0.0381828	-4.44145
Slc7a6os	-0.0730588	4.62887	-0.362061	0.719775	0.800019	-7.30902
Slc7a7	-1.72924	1.56845	-6.02581	1.16e-06	1.39e-05	5.30708
Slc7a8	0.987559	5.74024	5.79495	2.24e-06	2.37e-05	4.14583
Slc8a1	1.09949	4.68501	4.09265	0.000284125	0.00134054	-0.618134
Slc8a2	1.08546	7.01061	5.50263	5.16e-06	4.72e-05	3.24861
Slc8a3	0.567506	4.08324	2.77921	0.00919519	0.0249643	-3.81431
Slc8b1	-1.0841	2.99779	-4.15582	0.000238165	0.00115659	-0.0435469
Slc9a1	-0.0467275	5.54561	-0.313083	0.756325	0.827519	-7.44976
Slc9a2	0.919928	0.47535	2.77578	0.00927292	0.0251419	-3.31642
Slc9a3r1	0.0638306	6.12322	0.4802	0.634473	0.728845	-7.43603
Slc9a3r2	1.07973	4.6452	6.08126	9.93e-07	1.22e-05	5.11307
Slc9a5	0.388668	3.46619	2.17613	0.0373252	0.078694	-5.00774
Slc9a6	0.791863	6.54872	6.72456	1.63e-07	2.64e-06	6.7386
Slc9a7	0.273531	6.01151	2.18894	0.0362953	0.076884	-5.26442
Slc9a8	-0.278354	4.42854	-1.81175	0.0797706	0.145945	-5.77237
Slc9a9	-0.250388	3.8695	-1.38772	0.175165	0.272825	-6.27928
Slco1a4	-1.24426	0.37105	-3.71452	0.000806329	0.0032177	-0.954458
Slco1a5	-2.21241	0.944202	-6.03811	1.12e-06	1.35e-05	5.4045
Slco1c1	0.351654	4.70217	2.52492	0.0169312	0.041103	-4.30169
Slco2b1	-2.87933	0.9918	-9.3143	1.78e-10	8.52e-09	13.9758
Slco3a1	0.990865	5.64245	6.17054	7.71e-07	9.85e-06	5.20793
Slco4a1	0.0649987	0.0618009	0.207281	0.837153	0.887844	-6.76908
Slco4c1	1.7203	0.864547	5.39502	7.02e-06	6.15e-05	3.5647
Slco5a1	-0.155631	4.18775	-0.890245	0.380224	0.500301	-7.00741

## Sheet: B27 Starved
Gene expression of KO PCC against WT (b27 starved Condition)
	logFC	AveExpr	t	P.Value	adj.P.Val	B
Ndrg2	2.32543	8.16368	18.5477	2.75721e-18	3.7927e-14	31.7487
Acta2	-4.97782	5.637	-17.965	6.80814e-18	3.7927e-14	30.7805
Mkrn1	-5.91296	3.11429	-17.7905	8.96608e-18	3.7927e-14	30.1708
Npvf	-4.68741	1.80365	-17.6846	1.06102e-17	3.7927e-14	30.0758
1500015O10Rik	-4.70456	4.66651	-17.5477	1.3204e-17	3.7927e-14	30.07
Sparcl1	2.48794	10.2375	17.353	1.80653e-17	4.18791e-14	29.8762
Vtn	-4.72682	2.77861	-17.2777	2.04118e-17	4.18791e-14	29.3468
Ogn	-4.86563	3.76879	-17.1602	2.47132e-17	4.43664e-14	29.3966
Igf2	-4.56203	5.12611	-16.9824	3.3076e-17	5.27819e-14	29.1653
Akr1c14	-4.11917	3.38116	-16.7087	5.20595e-17	6.55438e-14	28.6852
Gpr17	3.40211	6.04275	16.6863	5.40424e-17	6.55438e-14	28.7888
Ntsr2	3.25442	5.71423	16.6443	5.79733e-17	6.55438e-14	28.7147
Col3a1	-5.34293	3.80651	-16.6305	5.93281e-17	6.55438e-14	28.4593
Fmod	-4.60219	3.99262	-16.5439	6.86108e-17	7.03849e-14	28.4416
Slc38a10	-5.59749	4.36971	-16.3212	9.99824e-17	9.57298e-14	28.0786
A730049H05Rik	-4.75249	2.31026	-16.2043	1.2203e-16	1.09537e-13	27.7245
Dlk1	-3.76534	5.4935	-16.1625	1.31083e-16	1.10742e-13	27.9109
Angptl4	5.19555	1.73695	15.733	2.75784e-16	2.20045e-13	26.8671
Apod	-4.2339	4.74852	-15.6872	2.98815e-16	2.25873e-13	27.0226
Emp1	-3.88356	4.49115	-15.383	5.11623e-16	3.67397e-13	26.5358
Igfbp2	-3.74307	8.28791	-15.2813	6.13435e-16	4.19531e-13	26.3579
Lgals1	-3.17043	5.52573	-15.1826	7.32415e-16	4.78134e-13	26.205
P3h2	-4.02294	3.94742	-15.1275	8.08793e-16	5.05038e-13	26.063
Col18a1	-4.01529	3.31631	-15.039	9.49199e-16	5.58153e-13	25.8254
Col4a1	-2.66044	6.21741	-15.0262	9.7158e-16	5.58153e-13	25.9178
Lcn2	-3.9296	0.372179	-14.9869	1.04339e-15	5.76355e-13	25.49
Pxdc1	-2.70304	4.14394	-14.9006	1.22106e-15	6.3923e-13	25.6889
Cybrd1	-2.64418	4.30726	-14.8894	1.24624e-15	6.3923e-13	25.6728
Lox	-4.59303	3.61957	-14.779	1.5254e-15	7.55442e-13	25.3724
Col8a1	-4.40926	2.05865	-14.6515	1.92953e-15	9.2373e-13	25.0161
Abhd3	2.37549	5.26265	14.3845	3.17248e-15	1.46978e-12	24.7475
Car2	1.91266	5.06129	14.283	3.83885e-15	1.72292e-12	24.5575
Wisp2	-5.47441	2.68548	-14.244	4.1323e-15	1.79647e-12	24.3805
Cxcl10	-3.61913	3.34372	-14.2288	4.25288e-15	1.79647e-12	24.4266
5930403L14Rik	1.82135	6.33923	14.1417	5.01601e-15	2.05828e-12	24.267
Igfbp3	-3.28973	6.64795	-14.1039	5.3897e-15	2.15019e-12	24.2017
Ccnb2	-2.21443	4.01262	-14.0589	5.87146e-15	2.27908e-12	24.1309
Col1a1	-5.19806	4.81304	-13.9846	6.76666e-15	2.55744e-12	23.9551
Marco	-3.88442	0.187471	-13.9131	7.76281e-15	2.79838e-12	23.6089
Cryab	-3.2175	5.51188	-13.911	7.79383e-15	2.79838e-12	23.849
Slc6a11	2.0333	8.03533	13.8216	9.25865e-15	3.22429e-12	23.6346
Pcolce	-3.84479	2.27302	-13.8121	9.42905e-15	3.22429e-12	23.5767
Rassf4	-4.31446	3.59811	-13.7065	1.15715e-14	3.86489e-12	23.4479
Emp2	2.04989	7.4995	13.5045	1.71693e-14	5.60421e-12	23.021
Gstm2	-3.28863	2.98567	-13.4736	1.82449e-14	5.82297e-12	22.9933
Slc43a2	1.61438	6.74736	13.4405	1.94738e-14	6.08005e-12	22.8958
Hapln1	-2.5877	5.51656	-13.3253	2.44515e-14	7.47177e-12	22.7083
Traf1	-3.04171	1.85607	-13.2299	2.95554e-14	8.84322e-12	22.4741
Col22a1	-3.81928	2.52682	-13.188	3.2134e-14	9.41854e-12	22.3839
Anxa3	-2.95844	2.84464	-13.16	3.39842e-14	9.76163e-12	22.3866
Lyz2	-3.80133	5.25605	-13.1119	3.7422e-14	1.05383e-11	22.2927
Pltp	-2.31769	5.90501	-13.0187	4.51393e-14	1.24671e-11	22.0747
Cst3	1.60658	11.5751	12.9572	5.11072e-14	1.38491e-11	21.8918
Lama4	-3.17629	2.91464	-12.9423	5.26698e-14	1.40082e-11	21.9335
B2m	-2.09652	7.34508	-12.8397	6.48613e-14	1.69371e-11	21.6766
Fcer1g	-3.98716	3.77268	-12.8	7.03315e-14	1.80375e-11	21.6862
C3	-6.04145	2.57966	-12.7584	7.65586e-14	1.91259e-11	21.5748
Bcas1	2.56696	5.94063	12.751	7.77321e-14	1.91259e-11	21.5338
Vgll3	-3.50807	2.88609	-12.7457	7.85702e-14	1.91259e-11	21.5377
H2-K1	-2.20083	6.18977	-12.6951	8.71572e-14	2.08625e-11	21.4121
Postn	-3.29414	3.39707	-12.6611	9.34715e-14	2.20072e-11	21.3921
Plscr2	-3.56799	2.08372	-12.5957	1.06941e-13	2.47724e-11	21.2412
Serpinf1	-2.73832	3.39043	-12.5669	1.13482e-13	2.58702e-11	21.2005
Mfge8	1.47579	9.19693	12.4501	1.44554e-13	3.24389e-11	20.8557
Col5a1	-2.6151	4.3215	-12.4364	1.48755e-13	3.2868e-11	20.9461
Bmpr1b	1.87834	5.58212	12.3962	1.61746e-13	3.51969e-11	20.8116
Ctsh	-2.92167	2.24602	-12.3785	1.67807e-13	3.59708e-11	20.799
Ttr	-4.00956	1.93182	-12.3374	1.82854e-13	3.86199e-11	20.6322
Angpt1	-2.49586	5.04501	-12.3029	1.96549e-13	4.04762e-11	20.638
Dcn	-2.76126	5.08307	-12.3012	1.9728e-13	4.04762e-11	20.6532
Lgals9	-3.33125	1.63412	-12.2638	2.13384e-13	4.31636e-11	20.5381
Lbp	-3.38197	2.30221	-12.1478	2.72469e-13	5.41229e-11	20.317
Thbs1	-3.07185	6.13237	-12.1432	2.75099e-13	5.41229e-11	20.2603
Casq1	-3.41482	2.50746	-12.1331	2.81076e-13	5.45516e-11	20.303
Sox10	2.10225	5.641	12.1065	2.97342e-13	5.69391e-11	20.1847
Dnali1	-2.82579	3.3499	-12.0848	3.11302e-13	5.88279e-11	20.2161
Sod3	-3.56219	2.12097	-12.0652	3.24522e-13	6.02982e-11	20.1507
Madcam1	-3.1432	0.113254	-12.061	3.2748e-13	6.02982e-11	20.0136
Itih2	-3.67123	1.17621	-12.0183	3.58543e-13	6.39386e-11	19.9703
Plekha2	-2.66379	3.59402	-12.0159	3.60393e-13	6.39386e-11	20.072
Gpc3	-1.78982	4.56684	-12.0125	3.63007e-13	6.39386e-11	20.0544
Emp3	-3.44743	2.26456	-12.0099	3.65058e-13	6.39386e-11	20.0313
Entpd2	2.79472	4.4297	11.9204	4.41926e-13	7.61215e-11	19.8704
Hebp1	1.93959	4.81518	11.9169	4.45217e-13	7.61215e-11	19.8248
Ccl3	-3.86235	2.14157	-11.9024	4.59322e-13	7.76091e-11	19.7995
Angpt2	-3.31068	0.675802	-11.7987	5.73917e-13	9.53997e-11	19.5051
Sctr	-3.16714	0.922662	-11.7942	5.79548e-13	9.53997e-11	19.4872
Scd4	-3.03186	2.41343	-11.7902	5.84541e-13	9.53997e-11	19.5918
Slc1a2	2.31646	8.98167	11.7367	6.56095e-13	1.05875e-10	19.3356
Fstl1	-1.74835	8.05393	-11.7055	7.01862e-13	1.12002e-10	19.2718
Adgre1	-3.53114	1.38129	-11.6112	8.61384e-13	1.35947e-10	19.1803
Capsl	-2.86631	1.96211	-11.6026	8.77768e-13	1.36532e-10	19.1521
Agt	3.63274	2.9286	11.5963	8.89847e-13	1.36532e-10	19.1619
Mfsd2a	-2.22261	5.6434	-11.5944	8.93609e-13	1.36532e-10	19.1097
Tox	1.72499	5.82654	11.5577	9.68062e-13	1.46351e-10	19.0073
Cnn2	-2.05039	4.67922	-11.5172	1.05759e-12	1.5822e-10	18.9648
Ccnd2	-1.63158	7.8956	-11.4962	1.10743e-12	1.63968e-10	18.8141
Nuak1	-1.44066	6.5226	-11.4834	1.13894e-12	1.66912e-10	18.8126
Foxj1	-2.54327	6.08956	-11.4594	1.20033e-12	1.74133e-10	18.7633
Cd59a	-2.27373	3.08672	-11.43	1.28069e-12	1.83932e-10	18.8212
D17H6S56E-5	-2.33655	2.90594	-11.4116	1.33356e-12	1.89629e-10	18.7809
Ckap2	-2.12875	4.19699	-11.3928	1.38971e-12	1.95676e-10	18.7033
Pld4	-3.47806	1.61914	-11.3876	1.40578e-12	1.96018e-10	18.7101
Ect2	-1.8445	4.38332	-11.3824	1.42208e-12	1.96384e-10	18.6848
Col8a2	-3.34775	0.696528	-11.3731	1.45144e-12	1.98529e-10	18.6116
Tm4sf1	-3.2699	2.6165	-11.3396	1.56295e-12	2.11764e-10	18.626
Ccl5	-3.41961	0.247684	-11.2894	1.74656e-12	2.34431e-10	18.432
Ccnd1	-2.13668	4.63787	-11.2814	1.77799e-12	2.3644e-10	18.4503
Pik3ip1	1.62475	5.90864	11.276	1.79913e-12	2.37056e-10	18.3609
Bst2	-3.28673	2.45481	-11.2625	1.8539e-12	2.42053e-10	18.4573
Ltbp2	-4.23066	1.88755	-11.2513	1.90053e-12	2.45905e-10	18.4073
Ccdc3	-2.98444	3.8429	-11.1781	2.237e-12	2.86855e-10	18.253
Efhd1	2.10595	3.94299	11.1667	2.29432e-12	2.91602e-10	18.2312
Ddhd1	1.2246	6.80461	11.0883	2.73441e-12	3.44487e-10	17.9226
Rab31	-1.52121	7.82652	-11.0744	2.82086e-12	3.52289e-10	17.8704
Satb1	1.62481	7.05872	11.0662	2.87292e-12	3.55697e-10	17.8763
Serinc2	3.38404	2.44899	11.0041	3.30378e-12	4.03715e-10	17.8801
Sertm1	-2.10258	5.37196	-11.0023	3.31698e-12	4.03715e-10	17.7871
Ms4a6c	-3.12964	1.2828	-10.9531	3.70633e-12	4.47314e-10	17.7529
Eng	-3.61373	1.177	-10.9438	3.7847e-12	4.52965e-10	17.7066
Cdh26	-2.78537	0.725611	-10.9213	3.98231e-12	4.70817e-10	17.6439
Vip	-3.23923	1.29691	-10.9194	3.99942e-12	4.70817e-10	17.6735
Wfdc17	-3.23263	1.36793	-10.8985	4.19338e-12	4.89637e-10	17.6356
BC064078	-2.59799	3.75133	-10.838	4.81017e-12	5.57126e-10	17.4891
Fads2	1.13417	9.83045	10.8233	4.97308e-12	5.71387e-10	17.283
Ucma	-3.12577	1.60259	-10.7854	5.42153e-12	6.17968e-10	17.3969
Nid1	-3.19956	4.79615	-10.7483	5.89964e-12	6.6717e-10	17.2725
Casp12	-3.20839	0.938262	-10.7169	6.33949e-12	7.1131e-10	17.2059
Drc7	-2.54854	2.25482	-10.7097	6.44473e-12	7.17513e-10	17.2312
Myrf	3.1313	3.32823	10.6827	6.85617e-12	7.54131e-10	17.1673
Sfxn5	1.79218	7.05199	10.6812	6.87865e-12	7.54131e-10	16.983
Mdk	2.61907	6.70559	10.6672	7.1039e-12	7.72926e-10	16.9673
Myb	-2.24179	3.12964	-10.6541	7.31968e-12	7.90416e-10	17.084
1700094D03Rik	-1.69054	4.2726	-10.6406	7.55138e-12	8.0935e-10	17.0052
Cpxm1	1.51634	4.66862	10.6116	8.07216e-12	8.58758e-10	16.9424
Mme	-2.458	3.32394	-10.6083	8.13228e-12	8.58792e-10	16.9974
Cd52	-3.99427	2.11517	-10.5863	8.55485e-12	8.96823e-10	16.9529
Podxl	-2.20329	3.82518	-10.543	9.4533e-12	9.83828e-10	16.8362
Csrp1	1.5813	7.19164	10.5151	1.00831e-11	1.04182e-09	16.59
Rcsd1	-2.669	1.45238	-10.4528	1.16513e-11	1.19484e-09	16.6436
Rsph1	-2.28782	2.95571	-10.4498	1.17304e-11	1.19484e-09	16.6384
Anxa1	-3.59905	1.53968	-10.4402	1.19954e-11	1.21322e-09	16.6068
Cped1	-3.05472	1.5774	-10.4334	1.21874e-11	1.22403e-09	16.5901
Vim	-2.07073	9.60125	-10.3743	1.39833e-11	1.38757e-09	16.2342
Mmd2	1.42176	9.08087	10.3735	1.4009e-11	1.38757e-09	16.2418
Emilin1	-2.9365	2.08372	-10.3686	1.41704e-11	1.39394e-09	16.452
Itga11	-3.01696	1.01375	-10.3645	1.43081e-11	1.39791e-09	16.4173
Cep55	-1.73915	2.75877	-10.2881	1.71038e-11	1.65976e-09	16.2692
Slc7a10	2.96909	2.36874	10.2848	1.72371e-11	1.66147e-09	16.2547
Prokr2	1.634	5.61106	10.2711	1.78002e-11	1.70431e-09	16.1031
Col1a2	-3.2899	2.7191	-10.26	1.82673e-11	1.73745e-09	16.2013
Cfh	-3.3995	1.99023	-10.2414	1.90841e-11	1.8032e-09	16.1621
Gm29508	-1.81428	2.97987	-10.2203	2.00544e-11	1.88249e-09	16.1037
Foxd1	-3.07582	0.544833	-10.2016	2.09576e-11	1.95128e-09	16.0343
Ak9	-2.74429	2.15993	-10.1995	2.10589e-11	1.95128e-09	16.0683
Zfp853	2.54744	2.34319	10.1931	2.1381e-11	1.96018e-09	16.0511
Ddr2	-2.51196	2.88196	-10.1903	2.15191e-11	1.96018e-09	16.0363
Enpp6	2.82256	4.77157	10.1894	2.15644e-11	1.96018e-09	15.9488
Iqub	-2.67161	1.47669	-10.1812	2.19855e-11	1.97499e-09	16.0252
Cxcl16	-2.8201	1.79704	-10.1809	2.20024e-11	1.97499e-09	16.0253
Fcgr3	-2.21943	2.96301	-10.1637	2.29132e-11	2.04397e-09	15.9818
Specc1	1.27748	6.83488	10.1416	2.41406e-11	2.14017e-09	15.7259
Crb2	-2.82368	3.32741	-10.1365	2.44305e-11	2.15258e-09	15.9002
Paqr8	1.24417	7.20009	10.1295	2.48367e-11	2.17104e-09	15.6832
Glipr1	-3.38337	1.37053	-10.1278	2.49423e-11	2.17104e-09	15.8958
Pstpip1	-2.90789	2.4984	-10.1089	2.60771e-11	2.25614e-09	15.8567
S1pr1	1.46401	7.57477	10.1026	2.64692e-11	2.27635e-09	15.6126
Tpm1	-1.38942	7.04571	-10.0906	2.72367e-11	2.32841e-09	15.5976
Fads1	1.15645	9.27905	10.0718	2.84771e-11	2.42005e-09	15.5247
Itgam	-3.2483	1.7295	-10.0477	3.01472e-11	2.5469e-09	15.716
A2m	-2.97523	3.64783	-10.0359	3.10077e-11	2.60428e-09	15.6674
Omd	-2.80896	0.618645	-9.99755	3.39649e-11	2.83607e-09	15.5673
Mpp1	-1.63964	4.8579	-9.98516	3.49814e-11	2.90406e-09	15.4303
Aldoc	1.22252	9.79054	9.95011	3.80298e-11	3.13899e-09	15.2279
Dynlrb2	-2.23912	3.56809	-9.94448	3.85442e-11	3.16297e-09	15.393
Ccng1	-1.24885	7.40358	-9.94214	3.87608e-11	3.16297e-09	15.2259
Slco1a4	-3.19575	0.37105	-9.91546	4.13111e-11	3.35203e-09	15.384
5730559C18Rik	1.87169	4.43169	9.8972	4.31551e-11	3.46711e-09	15.2754
Folr1	-2.99115	1.86355	-9.89665	4.32122e-11	3.46711e-09	15.3628
Abcc12	-3.25621	1.02648	-9.86486	4.6631e-11	3.72064e-09	15.284
Gal3st1	2.48847	2.60811	9.85015	4.83054e-11	3.83294e-09	15.2516
Ppp1r1b	-1.64448	5.60712	-9.8152	5.25341e-11	4.14558e-09	14.9735
Itga3	-1.66857	4.80656	-9.81263	5.28596e-11	4.14847e-09	15.0583
Kdelr3	-2.48434	2.22415	-9.78063	5.70897e-11	4.4561e-09	15.0897
Pipox	-1.92709	3.95777	-9.7688	5.87405e-11	4.56017e-09	14.964
Aldh6a1	1.48912	6.90014	9.76004	5.99935e-11	4.6324e-09	14.7941
Ppp1r16b	1.47806	6.61504	9.74596	6.20659e-11	4.76679e-09	14.7854
St5	-1.48871	5.23991	-9.72633	6.50773e-11	4.97149e-09	14.7687
Kank4	-2.87488	2.33211	-9.69905	6.95139e-11	5.28232e-09	14.8912
Cfap52	-2.39003	2.34091	-9.69565	7.00873e-11	5.29786e-09	14.8823
Slc6a13	-3.1791	1.48383	-9.69302	7.05354e-11	5.30382e-09	14.8699
Adamts8	-2.1026	3.19833	-9.68551	7.18285e-11	5.37293e-09	14.8378
Sdc2	-1.21398	6.90997	-9.66884	7.47874e-11	5.56527e-09	14.5752
Pifo	-2.70855	1.79526	-9.62594	8.29891e-11	6.14376e-09	14.7235
Zfp488	2.48755	3.27879	9.617	8.48107e-11	6.24641e-09	14.6765
Bcan	1.79554	8.01702	9.60619	8.70691e-11	6.3702e-09	14.4084
Gpc4	-3.26098	3.62271	-9.60271	8.78087e-11	6.3702e-09	14.6232
Efs	1.59425	4.11783	9.60265	8.7822e-11	6.3702e-09	14.5855
Grm8	1.64376	4.09184	9.57515	9.38993e-11	6.77679e-09	14.513
Slco1a5	-3.27635	0.944202	-9.56858	9.54127e-11	6.84388e-09	14.5852
Unc93b1	-2.95012	2.56102	-9.567	9.57819e-11	6.84388e-09	14.5681
Il17rc	-2.27969	2.23799	-9.56036	9.73429e-11	6.89402e-09	14.5587
Gm41257	2.83887	2.2302	9.55994	9.74437e-11	6.89402e-09	14.563
Cp	-3.45271	1.42879	-9.54585	1.00848e-10	7.09992e-09	14.5326
Chst3	2.23285	2.69493	9.5347	1.0363e-10	7.26016e-09	14.4968
B3gat2	1.85312	4.57341	9.5097	1.10154e-10	7.67975e-09	14.3366
Cd53	-2.73471	1.56995	-9.49144	1.15182e-10	7.99152e-09	14.4017
Tbx18	-2.50384	1.46055	-9.48059	1.18281e-10	8.16705e-09	14.3684
Rbpms	-2.54536	2.05538	-9.47424	1.20134e-10	8.25534e-09	14.3555
Cnn1	-2.77563	2.07061	-9.47097	1.211e-10	8.28209e-09	14.3529
Gtse1	-1.56314	4.09435	-9.43973	1.30735e-10	8.88547e-09	14.1638
Mthfd2l	1.40223	5.07947	9.43841	1.3116e-10	8.88547e-09	14.1051
Serpine1	-3.46765	1.88225	-9.42704	1.34871e-10	9.09396e-09	14.2418
Gm17455	-2.6812	3.26791	-9.42111	1.36848e-10	9.18415e-09	14.1726
Arvcf	-1.25392	6.61112	-9.41167	1.40057e-10	9.35578e-09	13.9541
Adamtsl3	-2.79533	2.21649	-9.39051	1.47534e-10	9.80965e-09	14.1493
Psrc1	-1.77985	4.41066	-9.37616	1.52838e-10	1.01155e-08	13.9759
Map3k7cl	-2.51843	0.507604	-9.36414	1.57426e-10	1.03713e-08	14.0875
Abtb2	1.21903	5.44211	9.3417	1.66377e-10	1.08977e-08	13.8487
Cdk6	-1.94028	3.48396	-9.34035	1.66934e-10	1.08977e-08	13.9594
Rnf144a	1.38687	5.21668	9.33265	1.70133e-10	1.1004e-08	13.8274
Nuak2	-2.97931	3.89459	-9.33185	1.70469e-10	1.1004e-08	13.9328
Ptpn6	-2.58685	1.20445	-9.33092	1.7086e-10	1.1004e-08	14.0166
Pi15	-2.37824	2.6712	-9.32817	1.72022e-10	1.10294e-08	13.9833
Fam198b	-2.44377	2.50485	-9.31821	1.76305e-10	1.12537e-08	13.9737
Col5a2	-2.98964	3.74011	-9.30735	1.81097e-10	1.15085e-08	13.894
Ifi27	-2.20418	3.05385	-9.29498	1.86716e-10	1.18133e-08	13.8869
Pdlim2	-2.52682	3.32525	-9.28119	1.93194e-10	1.21695e-08	13.8191
Igfbp7	-2.56179	3.50119	-9.26613	2.00529e-10	1.25764e-08	13.7689
Adam8	-2.448	2.90676	-9.25897	2.04119e-10	1.27459e-08	13.807
Fbrsl1	1.90431	4.88597	9.25175	2.078e-10	1.28922e-08	13.6621
Lims2	1.91793	4.00448	9.25086	2.08258e-10	1.28922e-08	13.7363
Ttc25	-2.22501	2.30392	-9.2309	2.18826e-10	1.34883e-08	13.755
Zfp26	1.30834	5.11954	9.21975	2.24961e-10	1.37891e-08	13.5594
Ccdc67	-3.04981	1.82595	-9.21856	2.25627e-10	1.37891e-08	13.7413
Itgb2	-3.0756	1.94155	-9.18053	2.47984e-10	1.50913e-08	13.6404
Ube2u	-2.11767	0.028999	-9.16525	2.57592e-10	1.56099e-08	13.6029
Dab2	-2.03278	5.15403	-9.15528	2.6407e-10	1.59352e-08	13.377
Col5a3	-2.97379	1.25241	-9.12829	2.82436e-10	1.69722e-08	13.5253
Heg1	-2.40205	5.27444	-9.10768	2.97344e-10	1.77461e-08	13.2558
Bace2	-1.82106	5.46009	-9.10708	2.97786e-10	1.77461e-08	13.234
Foxc1	-2.80237	1.90882	-9.078	3.20229e-10	1.90046e-08	13.3978
Fxyd5	-2.82847	2.0951	-9.07457	3.22985e-10	1.90894e-08	13.3886
Apoe	1.49373	8.92209	9.06617	3.29843e-10	1.94148e-08	13.0472
1700007K13Rik	-1.44538	3.61231	-9.05229	3.41504e-10	2.00191e-08	13.2077
Vav1	-2.88954	1.37757	-9.04976	3.4368e-10	2.00648e-08	13.3316
Lgi3	2.02326	2.88761	9.04512	3.47692e-10	2.02168e-08	13.2906
Tyrobp	-2.99766	3.95334	-9.03369	3.57792e-10	2.07202e-08	13.1709
Btg1	1.37845	6.47058	9.02566	3.65074e-10	2.1057e-08	13.0026
Gmnc	-2.84665	1.09719	-9.01823	3.71939e-10	2.12996e-08	13.2564
Lect1	-2.40772	2.63558	-9.0179	3.72247e-10	2.12996e-08	13.2351
Lhfpl3	1.3489	6.32232	9.00085	3.88519e-10	2.21172e-08	12.9528
Cpne6	1.51878	5.67678	8.99972	3.89615e-10	2.21172e-08	12.9552
Col6a1	-1.81904	4.44078	-8.99471	3.94552e-10	2.23093e-08	13.0416
Iqcg	-1.81583	4.33057	-8.97993	4.09482e-10	2.29587e-08	13.0012
Fa2h	2.02979	2.69694	8.9794	4.10028e-10	2.29587e-08	13.127
Epas1	1.60457	6.68399	8.97862	4.10833e-10	2.29587e-08	12.8636
Thbs2	-2.47793	2.64589	-8.97196	4.17759e-10	2.32553e-08	13.1237
2410004P03Rik	-2.1288	4.12051	-8.96801	4.21934e-10	2.3397e-08	12.9723
Ecscr	-2.8548	0.558251	-8.96433	4.25855e-10	2.35236e-08	13.121
Prc1	-1.55845	4.82093	-8.96166	4.2873e-10	2.35917e-08	12.9456
Serpinh1	-1.79347	6.59763	-8.9502	4.41268e-10	2.41836e-08	12.7965
Enpp1	-2.18139	1.50042	-8.94878	4.42855e-10	2.41836e-08	13.0853
Srpx2	-2.8691	0.537066	-8.93528	4.58167e-10	2.4925e-08	13.051
Fgfrl1	-2.17389	3.20834	-8.91398	4.8344e-10	2.62006e-08	12.9338
Tmem255b	2.73723	3.4374	8.90358	4.96288e-10	2.67526e-08	12.9384
Tfpi	-2.30479	2.28636	-8.90273	4.97349e-10	2.67526e-08	12.9591
Scrg1	1.4726	5.50628	8.89861	5.02547e-10	2.69313e-08	12.7504
Plpp3	1.36454	8.96683	8.88775	5.16517e-10	2.7577e-08	12.5952
Kif23	-1.67559	4.06708	-8.87477	5.33735e-10	2.83059e-08	12.7889
Cldn10	1.98865	4.39592	8.87449	5.34111e-10	2.83059e-08	12.7483
Islr	-2.21595	3.55541	-8.86662	5.44841e-10	2.87684e-08	12.8087
Nckap1l	-2.49557	2.12708	-8.86444	5.4785e-10	2.88213e-08	12.8543
Slc7a11	2.46986	5.06006	8.85676	5.58597e-10	2.91978e-08	12.6936
Gad1	-1.04769	8.48411	-8.85643	5.59073e-10	2.91978e-08	12.5182
Rgs5	-3.26693	1.76923	-8.84953	5.68915e-10	2.96042e-08	12.8273
Ccl9	-2.50187	1.65043	-8.84716	5.72329e-10	2.96743e-08	12.8277
Kif9	-1.55993	3.9119	-8.84261	5.78957e-10	2.991e-08	12.6974
Nebl	-1.51591	5.00304	-8.83898	5.84302e-10	3.0078e-08	12.5885
H2-D1	-1.78184	5.73121	-8.8283	6.00322e-10	3.07797e-08	12.53
Ctss	-3.35263	3.00114	-8.82706	6.02221e-10	3.07797e-08	12.7167
Rdh10	-1.41356	4.99579	-8.82511	6.05196e-10	3.08221e-08	12.5746
Tpx2	-1.51351	4.51529	-8.82131	6.11048e-10	3.09518e-08	12.6132
Rnase1	3.96994	1.43245	8.82066	6.12054e-10	3.09518e-08	12.7537
Kif2c	-1.43071	3.46775	-8.8161	6.19181e-10	3.12024e-08	12.6863
Dcxr	-1.48777	4.53042	-8.77477	6.87638e-10	3.4531e-08	12.4286
Cemip	-1.94635	3.68285	-8.76789	6.99761e-10	3.50173e-08	12.5702
Pcdh17	1.21345	6.51318	8.76613	7.02898e-10	3.50522e-08	12.3432
Adap2	-2.48744	0.464234	-8.76199	7.10331e-10	3.53002e-08	12.624
Scd1	1.36624	8.97399	8.75325	7.26297e-10	3.59692e-08	12.2601
C1ql1	1.62867	4.85997	8.73987	7.51442e-10	3.70866e-08	12.3733
Tnr	1.7539	7.45773	8.72966	7.7122e-10	3.79324e-08	12.2246
Ccdc151	-1.62318	3.27962	-8.719	7.92437e-10	3.88429e-08	12.4292
Peli2	1.45397	5.38121	8.71509	8.00389e-10	3.90993e-08	12.258
Flnb	-2.22342	5.58517	-8.71317	8.04313e-10	3.91578e-08	12.2587
Gm19705	-2.50984	1.0648	-8.69689	8.3838e-10	4.06784e-08	12.4615
Pnpla7	2.25811	3.82829	8.69271	8.47376e-10	4.09765e-08	12.3039
Baalc	1.26823	6.43994	8.68087	8.73371e-10	4.20918e-08	12.1082
Pcdh15	1.20871	5.03407	8.67334	8.90308e-10	4.27646e-08	12.1948
Ccl2	-3.5336	1.19402	-8.67108	8.95458e-10	4.28686e-08	12.3986
Pam	-1.10975	6.35129	-8.65882	9.23946e-10	4.39687e-08	12.055
Arsi	-2.76057	1.49716	-8.65856	9.2456e-10	4.39687e-08	12.367
Trim30a	-2.75243	1.28825	-8.65415	9.35053e-10	4.43209e-08	12.3489
Mxra8	-1.82133	3.98421	-8.61782	1.02612e-09	4.84775e-08	12.0956
Atp1a2	1.7393	10.1352	8.60412	1.06276e-09	5.0044e-08	11.8592
Sun2	1.28533	5.71711	8.60185	1.06896e-09	5.01713e-08	11.9327
Cx3cr1	-2.45095	2.13654	-8.5751	1.14486e-09	5.35585e-08	12.1012
Eno4	-1.94582	2.20959	-8.57348	1.14963e-09	5.3607e-08	12.1226
Nat8f4	1.73604	3.40098	8.55318	1.21114e-09	5.62926e-08	11.9961
Ccdc153	-2.30973	2.52132	-8.54628	1.23279e-09	5.71142e-08	12.0331
Aif1	-2.51125	1.79793	-8.54034	1.25178e-09	5.76625e-08	12.047
Ptpre	1.67882	4.29575	8.54006	1.25266e-09	5.76625e-08	11.9147
Parvb	1.83319	4.43318	8.5333	1.27465e-09	5.83944e-08	11.8976
Efhb	-2.52708	1.18745	-8.53176	1.27968e-09	5.83944e-08	12.0415
Vegfd	2.71177	2.78395	8.53144	1.28076e-09	5.83944e-08	12.03
Cdh20	1.27482	5.01618	8.52911	1.28844e-09	5.85589e-08	11.8328
Cth	-1.59149	2.7803	-8.52109	1.31529e-09	5.95907e-08	11.9789
Anxa5	-1.79084	6.78046	-8.5108	1.35061e-09	6.0975e-08	11.6534
Iqcd	-2.49889	0.767446	-8.50973	1.35434e-09	6.0975e-08	11.9957
Gm867	-2.56446	1.61365	-8.50494	1.37113e-09	6.11775e-08	11.972
Msrb3	-2.52819	2.59975	-8.5049	1.37129e-09	6.11775e-08	11.9178
Ldlr	-1.74852	6.10147	-8.5048	1.37162e-09	6.11775e-08	11.7809
Appl2	1.97191	5.71228	8.499	1.39229e-09	6.19072e-08	11.6917
Dnajb13	-2.82955	2.23785	-8.49609	1.40274e-09	6.21794e-08	11.9131
Rai2	-1.7236	2.62647	-8.49361	1.41174e-09	6.23861e-08	11.8818
Cdk1	-1.37955	5.46158	-8.48857	1.43021e-09	6.30084e-08	11.6882
Gbp5	-2.37577	0.605474	-8.48156	1.45629e-09	6.39608e-08	11.9253
Arhgdib	-1.60172	4.67267	-8.46916	1.50359e-09	6.57608e-08	11.663
Lmx1a	-2.25744	1.15826	-8.46843	1.50643e-09	6.57608e-08	11.8924
Nhlh2	2.17129	1.8479	8.46437	1.52229e-09	6.62518e-08	11.8774
Cyp2j9	1.62404	4.28038	8.46201	1.53159e-09	6.64553e-08	11.6649
Ncf1	-2.84353	1.11034	-8.44999	1.57988e-09	6.8344e-08	11.8372
Ecm1	-2.44628	2.56392	-8.40506	1.77446e-09	7.65311e-08	11.6776
Gngt2	-2.64059	0.648124	-8.40193	1.7889e-09	7.69226e-08	11.725
Psmb8	-2.57107	1.84536	-8.40055	1.79527e-09	7.69663e-08	11.692
Fli1	-2.24769	1.04741	-8.39768	1.80868e-09	7.71668e-08	11.7108
Slc20a2	1.55054	6.52716	8.39725	1.81069e-09	7.71668e-08	11.3716
Rbms1	-1.65171	3.86631	-8.38741	1.85743e-09	7.89243e-08	11.5614
Cald1	-1.66133	6.30711	-8.38574	1.86546e-09	7.90316e-08	11.3446
Lrrc23	-2.18288	2.79023	-8.37835	1.90152e-09	8.00875e-08	11.5884
Bmp6	-2.17721	5.75696	-8.37835	1.90154e-09	8.00875e-08	11.3435
Padi2	4.03749	2.99322	8.36444	1.97135e-09	8.27852e-08	11.5862
Cd300c2	-2.31302	0.61343	-8.36279	1.97982e-09	8.28984e-08	11.6264
Milr1	-2.47634	0.606608	-8.3335	2.13619e-09	8.9186e-08	11.5508
Atp1a1	-1.26966	8.26713	-8.32588	2.17887e-09	9.07042e-08	11.1559
Foxf2	-3.01365	0.778256	-8.30053	2.32731e-09	9.66036e-08	11.4687
Sh2d4b	1.35052	4.27145	8.28429	2.42777e-09	1.00483e-07	11.2605
Maob	1.98939	1.75256	8.27194	2.50713e-09	1.03469e-07	11.3801
Osr1	-2.6033	1.20005	-8.26007	2.58592e-09	1.06416e-07	11.3562
Phf19	-1.57047	2.5013	-8.25582	2.61469e-09	1.07292e-07	11.2535
H2-Q4	-2.61419	2.41695	-8.24676	2.67722e-09	1.09545e-07	11.2732
Cybb	-2.55476	1.30882	-8.24152	2.7141e-09	1.10738e-07	11.3015
Hey1	-1.1089	5.86283	-8.22467	2.83609e-09	1.15146e-07	10.9554
Cideb	2.41399	1.56497	8.22439	2.83817e-09	1.15146e-07	11.2609
Luzp2	1.45575	7.54212	8.21401	2.91616e-09	1.17977e-07	10.8735
Bgn	-1.85737	5.00792	-8.1969	3.04953e-09	1.23026e-07	10.9298
Ube2c	-1.33632	5.6431	-8.18606	3.1372e-09	1.26208e-07	10.8758
H60b	-2.50921	1.41938	-8.18366	3.15699e-09	1.2665e-07	11.1609
Ccdc60	-2.25945	1.82013	-8.17448	3.23377e-09	1.29369e-07	11.1197
Cnksr3	2.11955	3.67619	8.16471	3.31751e-09	1.3235e-07	10.9904
Egln3	-1.42767	4.85322	-8.15129	3.43616e-09	1.36704e-07	10.849
Tpcn1	1.13366	6.41986	8.1436	3.50612e-09	1.38818e-07	10.7149
Aldh1a2	-2.38022	0.860866	-8.14306	3.51115e-09	1.38818e-07	11.0694
Stab1	-2.71136	3.52231	-8.14228	3.51829e-09	1.38818e-07	10.9144
Itga6	-1.34477	7.08029	-8.13863	3.55214e-09	1.39769e-07	10.6752
Shisa4	1.21035	5.83559	8.13715	3.56596e-09	1.3993e-07	10.7082
Cav1	2.05562	4.046	8.12987	3.6347e-09	1.42239e-07	10.9642
Cenpn	-1.31685	3.41637	-8.11445	3.78475e-09	1.47708e-07	10.8753
Enkur	-1.94533	3.41737	-8.1131	3.79821e-09	1.47832e-07	10.8613
Ms4a7	-2.89808	0.917889	-8.09704	3.96179e-09	1.53782e-07	10.9435
Tgfbr2	-2.35481	2.36299	-8.0767	4.17937e-09	1.6179e-07	10.8171
2810459M11Rik	1.67169	5.10462	8.07303	4.21993e-09	1.62921e-07	10.557
Arhgap29	-1.17037	4.75586	-8.06011	4.36585e-09	1.68103e-07	10.5969
Ptpn13	-2.33537	3.82329	-8.0583	4.3867e-09	1.68454e-07	10.6697
Clec4d	-2.65468	0.345389	-8.0553	4.42145e-09	1.69335e-07	10.8431
Spi1	-2.7174	1.81402	-8.04599	4.53122e-09	1.73078e-07	10.7814
Klhdc7a	-1.85595	1.87266	-8.039	4.61542e-09	1.75827e-07	10.7186
Anxa2	-2.14192	5.06639	-8.02327	4.81072e-09	1.82782e-07	10.4567
Pym1	1.26281	5.20494	8.02067	4.84389e-09	1.83557e-07	10.4614
Dclk3	-1.4356	4.31326	-8.01494	4.91755e-09	1.85858e-07	10.5442
Birc5	-1.61999	4.64805	-8.00719	5.0192e-09	1.89201e-07	10.4901
Kif27	-1.92275	3.39676	-8.00299	5.07508e-09	1.90058e-07	10.5809
D630045M09Rik	-2.10279	0.00631872	-8.00283	5.07726e-09	1.90058e-07	10.7113
Ccdc40	-1.56402	3.84616	-8.0025	5.08163e-09	1.90058e-07	10.5095
Acadl	1.16002	6.1943	7.99904	5.12834e-09	1.91307e-07	10.3182
Dusp26	1.8886	5.89369	7.99758	5.14806e-09	1.91391e-07	10.406
Rorb	1.47937	5.875	7.99691	5.15725e-09	1.91391e-07	10.3783
Kdr	-2.80345	2.39062	-7.98178	5.36743e-09	1.98678e-07	10.6088
Vipr2	1.89861	2.40437	7.9808	5.38136e-09	1.98681e-07	10.576
Ube2l6	-1.601	3.85827	-7.97697	5.43604e-09	2.00186e-07	10.4965
Melk	-1.60594	2.81543	-7.97128	5.51834e-09	2.02438e-07	10.5661
Cmtm5	1.43344	5.47101	7.9708	5.52539e-09	2.02438e-07	10.324
Pik3ap1	-2.68611	1.83197	-7.95706	5.72976e-09	2.09391e-07	10.5491
Inmt	-1.95918	-0.46778	-7.94963	5.84352e-09	2.13007e-07	10.5749
Efemp1	2.48922	2.98094	7.94786	5.871e-09	2.13466e-07	10.4257
Tmem107	-1.48804	4.28764	-7.93446	6.08298e-09	2.20616e-07	10.2951
Fyb	-2.42001	1.1815	-7.92102	6.30327e-09	2.28029e-07	10.477
Sat2	1.45298	4.68349	7.91794	6.3549e-09	2.29319e-07	10.2163
Mcidas	-2.16819	0.363506	-7.90852	6.51556e-09	2.34014e-07	10.4648
Igf1r	1.65983	6.36035	7.9084	6.51759e-09	2.34014e-07	10.099
Plau	-2.68713	2.1887	-7.90383	6.59713e-09	2.36279e-07	10.4103
Cfap206	-2.05117	2.06108	-7.89688	6.71989e-09	2.40077e-07	10.4012
C1qb	-2.48967	4.1108	-7.88851	6.87076e-09	2.44858e-07	10.1423
Vash1	1.23853	6.30434	7.88582	6.91981e-09	2.45996e-07	10.0544
Fcrls	-2.59853	2.27933	-7.88242	6.98266e-09	2.47617e-07	10.3001
Cxcl14	-1.5759	5.24815	-7.8808	7.01268e-09	2.48069e-07	10.1028
Pter	-1.72303	2.89114	-7.87451	7.13081e-09	2.51628e-07	10.2569
Chd7	1.89669	4.91473	7.86726	7.26936e-09	2.55889e-07	10.0811
Rnf122	1.19472	5.17743	7.85555	7.49899e-09	2.63326e-07	10.0089
Dkk3	1.23113	5.00789	7.84849	7.64116e-09	2.67664e-07	10.0472
Dnaaf3	-2.61807	1.12176	-7.83566	7.90628e-09	2.76277e-07	10.2669
Rsph4a	-1.90998	3.1114	-7.8346	7.92844e-09	2.76379e-07	10.1279
Tekt1	-2.34936	2.84039	-7.82657	8.09973e-09	2.81667e-07	10.1535
Armc3	-2.09413	1.96179	-7.82021	8.23789e-09	2.85779e-07	10.181
Adamts14	-2.2515	0.568988	-7.81369	8.38211e-09	2.90081e-07	10.22
Gcnt1	-2.39816	1.76374	-7.81035	8.45714e-09	2.91372e-07	10.164
Adamts15	-1.28868	3.2044	-7.81022	8.45997e-09	2.91372e-07	10.0737
Prelp	-1.88059	5.06995	-7.80364	8.6096e-09	2.95816e-07	9.87304
Nrgn	2.36992	8.09751	7.80067	8.67786e-09	2.9745e-07	9.79386
Dalrd3	-1.04164	6.44331	-7.79854	8.72739e-09	2.98051e-07	9.79733
Smoc1	1.13066	6.24267	7.79813	8.73692e-09	2.98051e-07	9.80352
Mmp2	-1.94821	2.74027	-7.78919	8.94751e-09	3.04512e-07	10.0639
Odf3b	-2.06009	1.9283	-7.78671	9.0068e-09	3.05805e-07	10.1046
Hacd4	-1.78956	3.88273	-7.77373	9.32409e-09	3.15831e-07	9.88596
Laptm5	-2.67972	4.5906	-7.77012	9.41416e-09	3.18132e-07	9.83163
Sv2c	-0.97881	5.25474	-7.76453	9.55563e-09	3.22155e-07	9.74612
4933431E20Rik	1.41082	5.91748	7.75106	9.90546e-09	3.33167e-07	9.72029
Omg	1.44632	5.98868	7.74882	9.96477e-09	3.34379e-07	9.68438
Kcnk9	-1.07355	6.12877	-7.74594	1.00417e-08	3.36087e-07	9.69532
Actn1	-1.26218	6.85119	-7.74517	1.00625e-08	3.36087e-07	9.63666
Cyb5b	-0.924883	7.29816	-7.73696	1.02856e-08	3.42742e-07	9.60888
Uaca	-1.57126	3.38681	-7.73249	1.0409e-08	3.46051e-07	9.84765
Capg	-2.2545	1.90399	-7.71855	1.08044e-08	3.58366e-07	9.91144
Abcf1	1.34541	6.55161	7.71309	1.09632e-08	3.62796e-07	9.57397
Stat6	-2.56895	1.68924	-7.7089	1.10867e-08	3.66038e-07	9.91042
Ptrf	-2.69962	4.27354	-7.70697	1.1144e-08	3.67088e-07	9.69249
Pla2g5	-2.20081	2.18657	-7.70211	1.129e-08	3.71046e-07	9.85779
Qdpr	0.908324	7.45428	7.69871	1.13932e-08	3.73583e-07	9.4987
Anxa4	-1.83139	4.02987	-7.6881	1.17213e-08	3.83465e-07	9.64723
Lrp2	-3.17354	3.06254	-7.68527	1.18106e-08	3.85507e-07	9.78749
Maats1	-1.94222	2.68218	-7.6822	1.19081e-08	3.8781e-07	9.76013
Adcyap1r1	1.20473	7.03623	7.6765	1.20914e-08	3.92888e-07	9.4508
Cdc42ep1	-1.50797	4.347	-7.67427	1.21637e-08	3.94347e-07	9.53088
Aoah	-1.99621	0.147455	-7.6678	1.23764e-08	3.99566e-07	9.8441
Llgl2	-2.11129	0.897082	-7.66768	1.23804e-08	3.99566e-07	9.83343
Dnaic2	1.97774	3.81467	7.66047	1.26219e-08	4.06449e-07	9.56995
Dnaic1	-1.9377	1.78397	-7.65801	1.27056e-08	4.08228e-07	9.779
Fhad1	-2.31044	1.6123	-7.64912	1.30119e-08	4.17135e-07	9.74216
Pafah1b2	1.59965	7.51239	7.63961	1.33484e-08	4.26969e-07	9.34742
Adora2a	-1.46416	4.24477	-7.62874	1.37433e-08	4.38624e-07	9.4946
Plxdc2	-1.06784	6.62122	-7.62251	1.39753e-08	4.44489e-07	9.31181
Pgm5	-2.39572	1.81207	-7.62214	1.39889e-08	4.44489e-07	9.67338
Pbk	-1.88426	3.40843	-7.6072	1.45618e-08	4.6167e-07	9.55375
Cutal	-2.15367	0.425855	-7.60273	1.47378e-08	4.66221e-07	9.66586
Bcam	-1.91917	3.20259	-7.59314	1.51227e-08	4.77345e-07	9.49783
Lrrc8d	1.35775	6.93468	7.58947	1.52725e-08	4.81018e-07	9.21932
Irf5	-2.31288	1.13451	-7.5864	1.53994e-08	4.83954e-07	9.60132
Serpinb5	-1.81407	0.931613	-7.58024	1.56568e-08	4.90967e-07	9.57786
Rtp4	-2.64329	1.61776	-7.57289	1.59692e-08	4.99673e-07	9.54389
Gpam	0.917377	7.67308	7.57117	1.60432e-08	4.99983e-07	9.14781
Sfrp2	1.41357	4.2134	7.57105	1.60488e-08	4.99983e-07	9.35446
Usp18	-2.24286	0.27474	-7.56652	1.62456e-08	5.05021e-07	9.57271
Dmrta1	2.47725	0.935979	7.56458	1.63306e-08	5.06565e-07	9.57538
Paqr6	1.81433	2.41541	7.55414	1.6796e-08	5.19879e-07	9.4747
Ccdc113	-2.09361	1.34378	-7.55236	1.68766e-08	5.21252e-07	9.50629
Ptpmt1	1.27042	4.13909	7.54929	1.70169e-08	5.24211e-07	9.26148
Ifi30	-1.21837	4.82431	-7.54867	1.70454e-08	5.24211e-07	9.27257
Gpnmb	-2.28646	4.13898	-7.5439	1.72658e-08	5.29853e-07	9.26559
Zfp664	1.35033	6.11895	7.5423	1.73403e-08	5.31005e-07	9.11282
2810417H13Rik	-1.261	5.33604	-7.53577	1.76486e-08	5.39296e-07	9.16996
Afap1l2	-1.18728	4.97737	-7.53373	1.77457e-08	5.41113e-07	9.15096
Zfp37	1.05965	4.80965	7.52676	1.80822e-08	5.50204e-07	9.16583
Dmkn	-1.94012	0.989188	-7.51814	1.85074e-08	5.61952e-07	9.44034
S100b	1.74579	3.92283	7.51712	1.85583e-08	5.6231e-07	9.25657
Col9a3	2.11537	3.93814	7.51574	1.8628e-08	5.63232e-07	9.27952
Spata18	-2.37854	2.16342	-7.50964	1.89369e-08	5.71369e-07	9.34918
Rarb	-1.11495	4.23749	-7.50566	1.91416e-08	5.76334e-07	9.12423
Dock2	-2.21085	0.537519	-7.49946	1.94647e-08	5.84837e-07	9.39902
Aass	-2.0711	0.941096	-7.49029	1.99526e-08	5.98243e-07	9.36424
P2ry6	-2.0153	0.627303	-7.48366	2.0313e-08	6.0778e-07	9.3438
Hrh1	2.38768	0.0641604	7.48047	2.0489e-08	6.10701e-07	9.3565
Pmp22	-1.21199	6.62586	-7.48035	2.04956e-08	6.10701e-07	8.9205
Wwc1	-1.37206	7.17894	-7.47546	2.07682e-08	6.17544e-07	8.89733
Sepp1	1.10908	7.66917	7.4738	2.08617e-08	6.1904e-07	8.87811
Ddit3	1.08841	5.08158	7.47222	2.09506e-08	6.1934e-07	9.00836
Grik1	-1.21781	4.38881	-7.47209	2.0958e-08	6.1934e-07	9.04295
Prodh	1.55857	3.75541	7.45592	2.18944e-08	6.45682e-07	9.11179
Ccdc108	-1.78108	1.55448	-7.45168	2.2147e-08	6.51794e-07	9.24574
Wdr63	-2.11753	1.72741	-7.45074	2.22037e-08	6.52127e-07	9.22499
S100a1	1.42274	4.71887	7.43712	2.30371e-08	6.75221e-07	8.92857
Fbln2	1.99539	2.70596	7.42982	2.34973e-08	6.87307e-07	9.15618
Gmnn	-1.27952	3.5281	-7.42729	2.36587e-08	6.90624e-07	9.0261
Pnrc1	1.29695	6.68325	7.4189	2.42027e-08	7.05068e-07	8.76942
Jmjd1c	1.01062	6.06118	7.41589	2.44004e-08	7.09389e-07	8.77911
Wbscr27	1.78869	2.83484	7.41379	2.45399e-08	7.12003e-07	9.04296
Jam2	-1.30088	7.23556	-7.41213	2.46503e-08	7.13765e-07	8.71736
Arhgef10l	1.23903	5.89345	7.39855	2.55747e-08	7.39042e-07	8.73762
Lcp2	-2.20047	1.36429	-7.397	2.56823e-08	7.40661e-07	9.07293
Gbp3	-2.34261	2.69528	-7.38651	2.64234e-08	7.60506e-07	8.99364
Runx1	-2.38454	1.14797	-7.3828	2.66908e-08	7.66665e-07	9.06791
Cav2	1.26385	6.29072	7.37605	2.71843e-08	7.79284e-07	8.64904
Lrrc25	-2.19833	0.49912	-7.36746	2.78254e-08	7.96073e-07	9.05118
Lcp1	-1.94175	3.80758	-7.36637	2.7908e-08	7.96847e-07	8.78993
Rasgef1b	1.18816	5.57344	7.36424	2.80696e-08	7.98677e-07	8.68486
AI464131	1.15648	5.01789	7.36406	2.80833e-08	7.98677e-07	8.73862
Epb41l4a	-1.0927	4.88595	-7.35974	2.84148e-08	8.0651e-07	8.70479
Agpat3	0.791431	8.57301	7.35845	2.85145e-08	8.07743e-07	8.55357
Gna14	-2.16326	0.407285	-7.34447	2.96186e-08	8.37368e-07	8.98883
Mrpl50	1.12248	5.4615	7.3412	2.98824e-08	8.43165e-07	8.60667
Cfap161	-2.12547	1.82948	-7.33989	2.99889e-08	8.44511e-07	8.90968
Cfap44	-2.22058	1.57976	-7.335	3.03901e-08	8.54136e-07	8.9183
1700028P14Rik	-2.07588	1.33919	-7.33007	3.0801e-08	8.63991e-07	8.91153
Rac2	-2.58073	0.863797	-7.32549	3.11865e-08	8.73099e-07	8.91645
Nek11	-1.3962	3.49008	-7.31973	3.16788e-08	8.85157e-07	8.71117
Fam234b	1.60304	5.94674	7.31529	3.20641e-08	8.94184e-07	8.50598
Htra1	0.945395	5.80565	7.29681	3.37182e-08	9.36582e-07	8.45766
Pqlc3	-1.84	2.83222	-7.29617	3.3777e-08	9.36582e-07	8.69757
A4galt	-2.17841	0.470207	-7.29607	3.3786e-08	9.36582e-07	8.86263
Mex3b	0.897796	7.08399	7.29543	3.38453e-08	9.36582e-07	8.41083
Arl4a	1.22143	6.52442	7.28392	3.49226e-08	9.63371e-07	8.39838
Cd72	-2.47118	1.70603	-7.28366	3.49475e-08	9.63371e-07	8.74307
Dapl1	-2.34309	0.156672	-7.28189	3.51165e-08	9.66174e-07	8.82521
Npl	-1.12405	4.54237	-7.28076	3.52244e-08	9.67289e-07	8.50944
Icam1	-2.41936	1.08827	-7.27812	3.54792e-08	9.72427e-07	8.79446
Knstrn	-1.39239	3.77814	-7.27503	3.57786e-08	9.78767e-07	8.58991
Abca8a	1.6733	4.27723	7.27381	3.58985e-08	9.80179e-07	8.58207
Grm3	1.85754	5.19824	7.27	3.62726e-08	9.88513e-07	8.52088
Ppp1r3c	0.948471	5.79846	7.26861	3.641e-08	9.90379e-07	8.38561
Etv5	-0.94462	6.76258	-7.26771	3.64995e-08	9.90937e-07	8.33692
Slc39a4	-2.1555	0.862905	-7.26511	3.67593e-08	9.96108e-07	8.75583
Mgll	1.19346	4.92268	7.26141	3.71318e-08	1.00431e-06	8.45069
Cyp39a1	-1.69962	3.52326	-7.26038	3.72364e-08	1.00524e-06	8.55065
Lgals3bp	-1.69184	4.24692	-7.25839	3.74396e-08	1.00883e-06	8.48677
Cbs	1.37178	4.54229	7.25246	3.80496e-08	1.02335e-06	8.46914
2310022B05Rik	1.34086	7.99622	7.24453	3.88821e-08	1.04379e-06	8.2567
Cd37	-2.66235	1.11267	-7.24308	3.90357e-08	1.04595e-06	8.69268
Alox5ap	-2.61483	0.466622	-7.23596	3.98018e-08	1.06411e-06	8.68958
Eci1	1.3315	4.03187	7.23541	3.98615e-08	1.06411e-06	8.4149
Ttll3	-1.47848	2.56484	-7.23224	4.02082e-08	1.07137e-06	8.58889
Sypl2	2.54413	0.564042	7.22713	4.07725e-08	1.0844e-06	8.68421
Unc5b	1.52499	3.43734	7.22301	4.12341e-08	1.09408e-06	8.50034
Prmt6	1.37759	4.34204	7.22253	4.12888e-08	1.09408e-06	8.40018
Hsd17b11	1.10873	4.94677	7.21742	4.18691e-08	1.10741e-06	8.28107
Arl11	-2.48647	0.789835	-7.21466	4.21858e-08	1.11374e-06	8.63435
Cmklr1	-1.95525	0.921944	-7.2134	4.23304e-08	1.1155e-06	8.62576
Cdc20	-1.53109	4.64175	-7.20865	4.28844e-08	1.12803e-06	8.33685
Oasl2	-2.56511	2.03357	-7.20104	4.37856e-08	1.14963e-06	8.52718
Aldh1a1	-1.92893	3.49821	-7.19394	4.46428e-08	1.17e-06	8.37179
Npas1	-2.49096	2.07827	-7.19264	4.48021e-08	1.17204e-06	8.5275
Shisa6	-1.08988	4.99672	-7.1913	4.49668e-08	1.17421e-06	8.27905
Apln	-1.38271	2.87766	-7.18557	4.56766e-08	1.19058e-06	8.37532
Tpmt	1.34456	4.75083	7.18418	4.58506e-08	1.19295e-06	8.25655
Hck	-2.03244	1.13049	-7.17288	4.72906e-08	1.22733e-06	8.52746
Spc24	-1.10724	4.35969	-7.17247	4.73431e-08	1.22733e-06	8.26859
Fzd1	-1.0735	4.80312	-7.16695	4.80642e-08	1.24378e-06	8.20254
Golga2	1.09314	5.93719	7.15464	4.97121e-08	1.28411e-06	8.07495
Pdk4	1.74146	3.77338	7.15363	4.98497e-08	1.28535e-06	8.25382
Hcls1	-2.63976	1.94951	-7.15249	5.00048e-08	1.28704e-06	8.38002
Rab11fip1	-2.19478	0.594118	-7.14526	5.10056e-08	1.31045e-06	8.45693
Tgfb1	-2.03758	2.30717	-7.13258	5.28079e-08	1.35433e-06	8.32539
Cfap45	-2.2801	2.69438	-7.12933	5.32815e-08	1.36404e-06	8.29267
Fezf2	2.34323	4.95776	7.12741	5.35618e-08	1.36878e-06	8.13931
Ogdhl	0.953876	6.17832	7.12647	5.36997e-08	1.36987e-06	7.97352
Fam216b	-2.53224	1.56599	-7.12401	5.40637e-08	1.37671e-06	8.34468
Gli1	-2.1989	1.09064	-7.12065	5.45643e-08	1.387e-06	8.38762
Arap2	1.37085	5.82197	7.10341	5.72055e-08	1.45156e-06	7.95766
Tle4	0.913103	6.88565	7.10134	5.75317e-08	1.45727e-06	7.88654
Ntm	1.03264	8.45147	7.0972	5.81892e-08	1.47015e-06	7.84221
Pknox1	1.13005	4.67767	7.09662	5.82816e-08	1.47015e-06	7.99918
Arhgap18	-1.3588	4.18039	-7.09621	5.83475e-08	1.47015e-06	8.03496
Abhd4	1.10052	6.55383	7.08912	5.9495e-08	1.49644e-06	7.84696
Tnfrsf9	-2.06436	-0.0871252	-7.0852	6.01386e-08	1.50998e-06	8.30656
Ccna2	-1.1144	5.81387	-7.08031	6.09518e-08	1.52773e-06	7.87459
LOC102637792	-1.48882	1.72219	-7.072	6.2359e-08	1.56028e-06	8.1951
Chrdl1	-1.62518	3.15925	-7.06841	6.29759e-08	1.57297e-06	8.08709
Slc16a4	-2.13227	1.92084	-7.06661	6.32893e-08	1.57806e-06	8.16436
Cxcl12	-1.57813	3.06017	-7.06526	6.35246e-08	1.58118e-06	8.1259
1810011H11Rik	-2.20509	0.0758872	-7.05032	6.61873e-08	1.6446e-06	8.21353
Tfap2a	-1.88629	0.099646	-7.04809	6.65934e-08	1.65184e-06	8.2091
Cstf2	0.769313	6.799	7.04377	6.739e-08	1.66872e-06	7.72823
Pgap2	0.969164	5.25829	7.0415	6.78117e-08	1.67392e-06	7.80007
Pcdh10	0.825683	8.63311	7.04112	6.78834e-08	1.67392e-06	7.68206
Abca9	-1.93516	0.860753	-7.04076	6.79498e-08	1.67392e-06	8.16621
Man1a	-1.27389	4.5342	-7.03603	6.88397e-08	1.69294e-06	7.88398
Zmynd10	-1.75985	2.30935	-7.03513	6.90098e-08	1.69422e-06	8.07794
Park2	1.6354	2.61351	7.03394	6.92376e-08	1.69691e-06	8.04358
1700123M08Rik	-2.11698	1.69836	-7.03119	6.97631e-08	1.70531e-06	8.07939
Il21r	-2.25714	0.285663	-7.0309	6.98178e-08	1.70531e-06	8.15261
Svip	1.33493	4.14451	7.02737	7.05e-08	1.71905e-06	7.85924
Tnfrsf10b	-1.52383	3.43467	-7.02233	7.14844e-08	1.7401e-06	7.87733
Gng12	1.11833	7.06979	7.02081	7.17843e-08	1.74444e-06	7.64956
Ccdc39	-1.0552	4.99466	-7.01762	7.24165e-08	1.75683e-06	7.76089
C230072F16Rik	-2.34313	2.05001	-7.00561	7.48519e-08	1.81286e-06	7.97834
Pou6f1	0.928534	6.54058	7.00045	7.59231e-08	1.8357e-06	7.61984
Cdh23	-2.31766	0.673468	-6.99922	7.6182e-08	1.83887e-06	8.05667
Grik3	0.918041	7.04828	6.99208	7.76947e-08	1.87014e-06	7.58834
Slc9a8	1.1517	4.42854	6.99188	7.77382e-08	1.87014e-06	7.73707
Dpy19l3	1.29851	4.2863	6.99125	7.78732e-08	1.87026e-06	7.7925
Papss2	1.86198	3.41886	6.99031	7.80752e-08	1.87198e-06	7.83884
Clec7a	-2.12105	2.70925	-6.98861	7.84402e-08	1.8776e-06	7.90366
Ccna1	-2.30214	0.45198	-6.98796	7.85808e-08	1.87783e-06	8.03231
AI661453	-1.77782	-0.264007	-6.98497	7.92313e-08	1.89023e-06	8.04117
Snip1	1.02457	4.45054	6.98392	7.94609e-08	1.89257e-06	7.72668
Hyls1	-1.14433	4.04259	-6.97554	8.13198e-08	1.93363e-06	7.76461
Parp14	-2.06304	0.796623	-6.97412	8.16382e-08	1.938e-06	7.98315
Erich3	-1.43536	3.34148	-6.97247	8.20099e-08	1.94361e-06	7.81914
Cks1b	-0.874518	5.59462	-6.97158	8.22126e-08	1.94399e-06	7.60136
Pawr	-2.05896	3.28844	-6.97121	8.22966e-08	1.94399e-06	7.80789
Lpar1	-1.12309	4.97463	-6.96928	8.27335e-08	1.9511e-06	7.61241
R74862	1.2256	4.17791	6.96109	8.46255e-08	1.99244e-06	7.70218
Zkscan1	1.1305	6.50048	6.95745	8.54794e-08	2.00925e-06	7.4898
Clcn6	0.709146	7.76913	6.95514	8.60253e-08	2.01878e-06	7.46167
2210408F21Rik	-1.42268	2.52767	-6.94044	8.95886e-08	2.09897e-06	7.78835
Ngfr	-1.78269	1.86933	-6.92927	9.23933e-08	2.16116e-06	7.80612
Pim3	0.857494	5.61281	6.92161	9.43708e-08	2.20383e-06	7.46855
Atp10a	-1.95447	1.17464	-6.91417	9.63306e-08	2.24594e-06	7.82305
Col4a2	-1.32832	4.52615	-6.9056	9.86377e-08	2.29369e-06	7.5344
Stox1	-1.38283	3.14996	-6.9053	9.872e-08	2.29369e-06	7.64136
Fam69c	2.12885	0.331214	6.9048	9.88576e-08	2.29369e-06	7.82308
1700007G11Rik	-2.15932	1.79161	-6.90283	9.93963e-08	2.30247e-06	7.73458
Wdr78	-1.79913	2.74097	-6.89555	1.01418e-07	2.34553e-06	7.65313
Trmt10a	1.18823	3.07998	6.89058	1.02821e-07	2.37413e-06	7.63406
Npy6r	-2.02637	-0.299748	-6.88906	1.03255e-07	2.38032e-06	7.78327
Phldb1	1.07415	5.7604	6.88776	1.03625e-07	2.38504e-06	7.36251
Cdc20b	-2.20505	0.7367	-6.88474	1.04495e-07	2.40121e-06	7.74679
Ppp1r15a	1.38704	5.31408	6.87991	1.05901e-07	2.42963e-06	7.41495
Hk3	-2.45749	1.09915	-6.87887	1.06206e-07	2.43275e-06	7.7168
Eepd1	0.8014	5.4369	6.87547	1.0721e-07	2.45183e-06	7.33036
Tac2	-2.23089	0.563415	-6.87374	1.07724e-07	2.45772e-06	7.72442
Ctgf	-1.7408	6.4618	-6.87346	1.0781e-07	2.45772e-06	7.26875
Slc16a12	-1.91088	1.09826	-6.87137	1.08434e-07	2.46802e-06	7.69829
Six3	-1.2649	4.41934	-6.86997	1.08856e-07	2.47371e-06	7.38087
Clstn2	0.916463	6.55299	6.86809	1.09422e-07	2.48266e-06	7.27034
Capn3	-1.65807	2.41793	-6.86644	1.09925e-07	2.49013e-06	7.65075
Gxylt2	-1.46889	2.32867	-6.86363	1.10784e-07	2.50323e-06	7.61301
Wisp1	-2.2566	1.41344	-6.8634	1.10852e-07	2.50323e-06	7.66776
Kif20a	-1.33462	4.91294	-6.8609	1.11622e-07	2.51541e-06	7.34834
Exoc3l4	-1.80693	0.696799	-6.86052	1.11741e-07	2.51541e-06	7.68354
Adgrg6	-1.71379	2.31403	-6.85959	1.12027e-07	2.51789e-06	7.58647
Kcna2	1.23375	4.686	6.85706	1.12816e-07	2.53166e-06	7.35431
Impact	1.05333	5.76932	6.85633	1.13045e-07	2.53234e-06	7.25392
Vegfb	1.6515	5.3516	6.85584	1.13199e-07	2.53234e-06	7.27559
Nefm	1.6354	6.04276	6.84937	1.15244e-07	2.57408e-06	7.26647
Sh3bp4	1.18261	6.0077	6.84381	1.17034e-07	2.60639e-06	7.21425
Rarres1	2.34049	0.983093	6.84375	1.17053e-07	2.60639e-06	7.64391
Hnrnpc	0.863326	8.45884	6.84026	1.18191e-07	2.62332e-06	7.12613
Blnk	-2.45072	1.73082	-6.83964	1.18393e-07	2.62332e-06	7.56646
Gaa	1.03018	7.50777	6.83945	1.18455e-07	2.62332e-06	7.13653
Cpne2	-0.80322	6.72868	-6.83918	1.18544e-07	2.62332e-06	7.1586
Arhgap24	-1.2289	2.85126	-6.83604	1.19581e-07	2.64219e-06	7.47348
Pros1	-1.79349	2.66823	-6.83283	1.20649e-07	2.66169e-06	7.47209
Col4a4	-1.90761	1.20663	-6.82851	1.22101e-07	2.68657e-06	7.56407
Cldn9	-1.75397	0.225406	-6.82837	1.22151e-07	2.68657e-06	7.61752
Anp32e	1.48477	7.89302	6.81943	1.25213e-07	2.74301e-06	7.07673
Mb	-1.98433	0.312149	-6.8194	1.25224e-07	2.74301e-06	7.5877
Hmcn1	-2.23572	0.56171	-6.81921	1.2529e-07	2.74301e-06	7.58631
Ano3	-1.71337	2.22866	-6.81015	1.28478e-07	2.80852e-06	7.47809
Zfp513	1.33395	4.2525	6.80397	1.30702e-07	2.85281e-06	7.2475
P4ha3	-1.35165	5.27789	-6.80134	1.31657e-07	2.86928e-06	7.10326
Dydc2	-2.09191	0.669221	-6.7989	1.32554e-07	2.88445e-06	7.50759
Sash3	-1.91467	0.419839	-6.78854	1.36418e-07	2.96405e-06	7.50681
Cfap77	-1.72879	2.15739	-6.78473	1.37868e-07	2.99102e-06	7.42071
Hpgds	-1.85037	2.22377	-6.78272	1.38642e-07	3.00329e-06	7.3528
Cadps	-0.909078	7.12594	-6.77922	1.39993e-07	3.02798e-06	6.99084
Ifi204	-1.72546	-0.302463	-6.77443	1.41867e-07	3.06391e-06	7.47784
Col12a1	-2.66284	2.61707	-6.76763	1.44574e-07	3.11767e-06	7.33886
Gpr37	1.59371	3.5404	6.7653	1.45512e-07	3.13173e-06	7.30086
Stxbp6	1.03473	5.76844	6.76489	1.45678e-07	3.13173e-06	7.01268
St3gal6	-1.12687	3.64671	-6.76439	1.4588e-07	3.13173e-06	7.17038
1500009L16Rik	-1.08044	5.09427	-6.75244	1.50804e-07	3.23262e-06	7.03271
Plek	-1.74542	3.74337	-6.75104	1.51395e-07	3.24043e-06	7.15161
Tppp3	-1.3521	5.81678	-6.74749	1.52898e-07	3.26418e-06	6.95855
Sparc	-1.93884	9.6554	-6.74734	1.52959e-07	3.26418e-06	6.84739
Lap3	0.764242	6.47878	6.74677	1.53204e-07	3.26457e-06	6.90681
Cib2	1.09645	4.56562	6.74489	1.54004e-07	3.27676e-06	7.05182
Adrb2	-2.00312	0.44134	-6.74418	1.5431e-07	3.2784e-06	7.37793
Tlr7	-2.00483	1.38151	-6.7413	1.55548e-07	3.29982e-06	7.32746
Cnnm3	1.03783	5.83813	6.73978	1.56209e-07	3.30896e-06	6.91796
Chpt1	0.999774	5.71134	6.73696	1.57436e-07	3.33004e-06	6.91162
Smox	1.0043	7.03213	6.72942	1.60776e-07	3.39568e-06	6.84815
Slc27a3	1.23545	3.78198	6.71958	1.65234e-07	3.48342e-06	7.10949
Tgfb3	-1.1545	4.35319	-6.71919	1.65415e-07	3.48342e-06	6.9858
Adgra2	-1.85245	2.46407	-6.71111	1.69178e-07	3.55744e-06	7.20782
Slc25a12	-1.17407	6.31205	-6.7027	1.73184e-07	3.63637e-06	6.81331
Bdh1	0.963429	8.02039	6.70024	1.74372e-07	3.65595e-06	6.74952
Sox9	1.40956	7.72961	6.69778	1.75574e-07	3.67579e-06	6.73632
Stard8	-1.5625	4.13267	-6.69675	1.76077e-07	3.68095e-06	6.90127
Itgal	-2.14915	0.202354	-6.69503	1.76921e-07	3.69323e-06	7.25303
Nkx2-2	1.30891	3.15268	6.6943	1.77282e-07	3.69539e-06	7.05208
Bin2	-2.16327	0.537043	-6.69348	1.77688e-07	3.69848e-06	7.23818
Pik3cg	-1.74907	0.529435	-6.69072	1.79057e-07	3.72159e-06	7.2314
Lpar6	-1.84181	2.86092	-6.6898	1.79516e-07	3.72573e-06	7.05866
Pias2	1.0593	6.94896	6.68732	1.80764e-07	3.74622e-06	6.73038
Eml1	-0.821678	6.49853	-6.68147	1.83731e-07	3.80222e-06	6.7417
Mylk	-1.97519	1.0332	-6.67948	1.84751e-07	3.81784e-06	7.18213
Zfp354c	0.949391	7.15358	6.67559	1.86768e-07	3.85396e-06	6.69676
Mlf1	-1.47887	3.21768	-6.67439	1.8739e-07	3.86125e-06	6.97879
Klf11	0.90701	5.81327	6.66964	1.8989e-07	3.90717e-06	6.71776
Prss35	2.245	2.35443	6.66902	1.90219e-07	3.90833e-06	7.14223
Dusp15	1.21888	4.06048	6.66338	1.93233e-07	3.96459e-06	6.88559
P4ha1	-0.964985	6.66055	-6.66004	1.95041e-07	3.99593e-06	6.66341
Slc25a34	2.01964	-0.0734911	6.65953	1.95317e-07	3.99593e-06	7.15042
Trabd2b	-1.71141	0.534147	-6.65523	1.97673e-07	4.03383e-06	7.14335
Nxph3	2.15588	4.28824	6.65512	1.97731e-07	4.03383e-06	6.93743
Zfp740	1.21586	6.00096	6.65181	1.99566e-07	4.06465e-06	6.67811
Il10rb	-1.88219	3.1885	-6.65138	1.99808e-07	4.06465e-06	6.93248
Dio2	1.46785	3.41491	6.64989	2.0064e-07	4.07579e-06	6.94524
Nusap1	-0.993288	4.32966	-6.64407	2.03921e-07	4.13659e-06	6.82842
Gas6	-1.12657	6.53099	-6.64273	2.04684e-07	4.14622e-06	6.6237
Atp1b3	-0.861739	7.05571	-6.64025	2.06103e-07	4.16909e-06	6.59626
Zfp39	1.04043	4.51345	6.63518	2.0904e-07	4.21512e-06	6.70978
Scara5	-1.81949	0.36776	-6.63509	2.09093e-07	4.21512e-06	7.08616
Zkscan17	1.04415	5.33938	6.63433	2.0954e-07	4.21512e-06	6.66926
Tlcd1	1.38317	4.54252	6.63431	2.09553e-07	4.21512e-06	6.81132
Ube2cbp	1.20265	3.51874	6.63265	2.10524e-07	4.22873e-06	6.86888
Mapre1	0.909831	8.13072	6.6272	2.13752e-07	4.28757e-06	6.53698
9230114K14Rik	-1.4542	2.31406	-6.62569	2.14653e-07	4.29964e-06	6.92339
Myo1c	-0.898877	4.50502	-6.6211	2.17418e-07	4.34897e-06	6.70312
Mettl13	1.25439	3.81752	6.61977	2.18226e-07	4.35905e-06	6.82087
Ephx1	-1.11913	8.1178	-6.61853	2.18982e-07	4.36809e-06	6.49936
Mical1	1.26844	3.24706	6.61064	2.23863e-07	4.45926e-06	6.83952
Snx20	-2.34459	0.136573	-6.60979	2.24395e-07	4.46366e-06	7.0183
Ick	0.98449	6.11356	6.60805	2.25487e-07	4.47918e-06	6.54641
Nek2	-1.76853	3.29195	-6.60722	2.26013e-07	4.48342e-06	6.83374
Ms4a6d	-2.42653	1.02423	-6.60508	2.27362e-07	4.50397e-06	6.96541
Mcc	1.25529	4.79169	6.60327	2.2852e-07	4.52067e-06	6.64104
Dner	-0.827353	9.51689	-6.59988	2.30693e-07	4.55739e-06	6.44382
Col6a2	-2.80689	1.50729	-6.59264	2.35408e-07	4.64413e-06	6.92305
Zfp626	0.943887	3.80897	6.59073	2.36665e-07	4.66253e-06	6.64973
Tekt4	-1.96451	0.568778	-6.59005	2.37114e-07	4.66497e-06	6.94903
Ace2	-1.76785	-0.132566	-6.58418	2.41035e-07	4.73563e-06	6.9608
Hspa4l	-1.06218	6.02259	-6.58317	2.41718e-07	4.73758e-06	6.46856
Adam9	-1.07758	6.26991	-6.58267	2.42052e-07	4.73758e-06	6.45504
Cox6a1	1.01745	9.54994	6.58257	2.42124e-07	4.73758e-06	6.39282
Rasgrp1	1.38005	4.38336	6.57875	2.44724e-07	4.78194e-06	6.6282
Myo6	1.39687	6.60569	6.57414	2.47896e-07	4.83734e-06	6.4225
Phactr3	1.01488	6.54797	6.56951	2.51123e-07	4.89367e-06	6.42656
Pogk	0.938027	5.52574	6.56674	2.53078e-07	4.92507e-06	6.46627
Sulf1	-1.65291	2.83019	-6.56432	2.54796e-07	4.9518e-06	6.77049
Shfm1	-0.863929	7.27873	-6.55029	2.64995e-07	5.14306e-06	6.33922
Ckap2l	-1.07643	4.32631	-6.53084	2.79815e-07	5.42335e-06	6.48985
Fbln5	-1.27508	3.78759	-6.52964	2.80762e-07	5.43437e-06	6.49636
Thbd	-2.1877	2.2169	-6.52857	2.81603e-07	5.44025e-06	6.71053
Syt11	0.696484	9.46079	6.52829	2.81823e-07	5.44025e-06	6.24343
Cdc40	0.794074	5.54304	6.52739	2.82536e-07	5.44668e-06	6.36363
Maf	-0.948951	5.34416	-6.52397	2.85253e-07	5.4917e-06	6.34949
Rit1	0.881588	5.79358	6.52216	2.86699e-07	5.51213e-06	6.32145
Gm17762	-1.07915	3.17826	-6.51387	2.93438e-07	5.63416e-06	6.51402
Kif4	-1.50925	3.13358	-6.5087	2.97713e-07	5.70861e-06	6.61028
Lamb1	-1.58497	4.12345	-6.50491	3.00892e-07	5.75369e-06	6.48185
Tnfaip2	-1.90386	1.56566	-6.5049	3.00899e-07	5.75369e-06	6.68224
Dock5	-1.75657	1.99182	-6.50405	3.01619e-07	5.75369e-06	6.64819
Mnt	0.789752	6.86847	6.50399	3.01666e-07	5.75369e-06	6.23171
Rogdi	0.994614	5.8796	6.49926	3.05697e-07	5.82284e-06	6.25264
Loxl1	-1.36656	3.22146	-6.49738	3.07312e-07	5.84585e-06	6.53142
Cdkn3	-1.61955	2.32795	-6.49446	3.09833e-07	5.886e-06	6.58359
Fads3	-1.07242	5.29279	-6.48267	3.20243e-07	6.07573e-06	6.28877
Accs	1.48724	2.10925	6.4775	3.24919e-07	6.15632e-06	6.55598
St8sia2	-0.813472	8.18816	-6.47389	3.28225e-07	6.21077e-06	6.11102
Uso1	0.984947	6.51332	6.46852	3.33209e-07	6.29677e-06	6.14059
Ccdc96	-1.644	2.35117	-6.46554	3.36005e-07	6.34127e-06	6.4819
Cfap126	-1.82993	0.953445	-6.4622	3.39161e-07	6.39244e-06	6.58587
Zfp369	1.13684	4.85934	6.45426	3.46806e-07	6.52794e-06	6.19124
Grb10	-1.10687	5.11662	-6.44669	3.54245e-07	6.65925e-06	6.1757
Slc39a12	-1.23517	5.54837	-6.42825	3.73074e-07	7.00403e-06	6.05465
Slc22a8	-2.0855	0.472706	-6.42394	3.77615e-07	7.08003e-06	6.51769
Slc25a16	1.02188	3.92432	6.41956	3.82289e-07	7.15833e-06	6.19847
Srxn1	1.67378	4.74286	6.41436	3.87908e-07	7.25409e-06	6.06129
Slc41a3	1.38341	3.37432	6.40819	3.9469e-07	7.37131e-06	6.2429
Gja1	1.22437	9.15645	6.40484	3.98425e-07	7.4314e-06	5.89318
LOC108167812	-1.96625	0.721824	-6.39023	4.15123e-07	7.73282e-06	6.39198
Tmem176b	-0.824403	6.59011	-6.38738	4.1846e-07	7.78487e-06	5.88943
Cetn2	-0.848883	5.974	-6.38613	4.19939e-07	7.80229e-06	5.93365
Uqcr10	0.971735	7.36547	6.38542	4.20775e-07	7.80771e-06	5.87462
Bcas3	0.874504	5.40174	6.38405	4.22405e-07	7.82785e-06	5.941
Rgs20	1.0656	5.09811	6.38158	4.25344e-07	7.87216e-06	5.97682
Dusp6	-1.13576	4.63642	-6.37907	4.28361e-07	7.91779e-06	6.05938
Lgi4	1.4923	2.51292	6.3764	4.31581e-07	7.96706e-06	6.27037
Npy	0.954576	7.79024	6.37447	4.3393e-07	8.00013e-06	5.82636
Parp10	-1.67738	1.85661	-6.37385	4.3469e-07	8.00387e-06	6.29172
Acyp1	1.70524	3.39862	6.37153	4.3753e-07	8.04585e-06	6.17698
Otud1	-1.1186	5.29433	-6.36982	4.39644e-07	8.07439e-06	5.91376
Rnd1	-1.29068	5.49645	-6.36799	4.41914e-07	8.1057e-06	5.96337
9430020K01Rik	-1.09621	5.94416	-6.36636	4.43943e-07	8.13253e-06	5.86378
Slc2a9	-1.86482	0.910895	-6.359	4.53228e-07	8.29205e-06	6.30284
Ppfia3	1.20491	6.20266	6.35841	4.53988e-07	8.29539e-06	5.86007
Tox2	-0.810919	5.38859	-6.35536	4.57894e-07	8.35046e-06	5.8765
Ucp2	-1.45047	4.58016	-6.35515	4.58165e-07	8.35046e-06	5.93274
Ldb2	1.39566	7.14809	6.35231	4.61838e-07	8.40675e-06	5.82295
Il23r	-1.732	-0.195939	-6.35154	4.62843e-07	8.41437e-06	6.32764
Nit2	0.729686	5.54151	6.34936	4.65698e-07	8.45352e-06	5.84601
1700012B09Rik	-1.97754	1.10788	-6.34899	4.66174e-07	8.45352e-06	6.26882
Mettl4	0.745197	5.84077	6.33583	4.83775e-07	8.76163e-06	5.78009
Nes	-1.26441	7.10244	-6.33205	4.88952e-07	8.84424e-06	5.72827
Tmem67	-1.19311	3.80734	-6.32705	4.95872e-07	8.95814e-06	5.95339
Cox6b2	-1.48744	4.28214	-6.32444	4.99537e-07	9.01301e-06	5.82007
Armc7	1.41313	2.3859	6.32282	5.01819e-07	9.04282e-06	6.14377
Arrdc3	0.793948	6.07909	6.31958	5.06427e-07	9.11441e-06	5.68906
Sncaip	-1.08311	5.26831	-6.3175	5.09402e-07	9.15649e-06	5.77129
Tnfrsf1b	-2.12279	2.17396	-6.31644	5.10925e-07	9.17237e-06	6.0821
Slc48a1	0.812431	6.87148	6.31562	5.12108e-07	9.18214e-06	5.67778
Tgm2	-1.81881	1.64471	-6.31226	5.16975e-07	9.25784e-06	6.12563
Defb1	-1.87239	-0.193552	-6.31121	5.18502e-07	9.26772e-06	6.20895
Inpp5d	-2.13588	1.35083	-6.311	5.18817e-07	9.26772e-06	6.11574
Ptprk	-1.14569	6.00941	-6.30767	5.23702e-07	9.34336e-06	5.73841
C1d	1.03339	5.43614	6.30198	5.32164e-07	9.48256e-06	5.75205
Hmmr	-1.6034	3.36565	-6.30112	5.33461e-07	9.48385e-06	5.96693
Slc38a11	-1.71361	0.124771	-6.30105	5.33557e-07	9.48385e-06	6.17898
Gng11	-1.72001	1.58134	-6.29877	5.37e-07	9.53324e-06	6.09431
Zc3h10	1.01838	4.17305	6.29591	5.41351e-07	9.59862e-06	5.82871
Ebf3	1.5683	1.78223	6.2941	5.4411e-07	9.63565e-06	6.08697
Myh8	-1.89354	2.21168	-6.28543	5.57576e-07	9.86195e-06	6.00045
LOC102635844	-1.67772	2.04407	-6.28207	5.62873e-07	9.9434e-06	6.04159
A930033H14Rik	1.63047	1.46148	6.2799	5.6634e-07	9.99236e-06	6.06405
Aurkb	-1.32649	3.79608	-6.2782	5.6905e-07	1.00278e-05	5.84087
Zfpm2	1.3111	3.91235	6.27669	5.71486e-07	1.00584e-05	5.87034
Ly86	-1.88344	0.988276	-6.27584	5.7286e-07	1.00593e-05	6.04707
Ecm2	-2.03176	2.06406	-6.27579	5.72936e-07	1.00593e-05	5.98176
Sdf2l1	-0.958387	3.91341	-6.27526	5.73791e-07	1.00617e-05	5.79942
D2hgdh	0.835096	4.72825	6.27447	5.75077e-07	1.00617e-05	5.70248
Mobp	-2.67866	1.72246	-6.27441	5.75175e-07	1.00617e-05	6.05596
Cd300ld	-1.74094	-0.079337	-6.27358	5.76523e-07	1.0073e-05	6.10887
Rassf9	-1.70661	0.155998	-6.26794	5.85768e-07	1.02221e-05	6.07714
Sox8	1.12144	4.97185	6.26708	5.87178e-07	1.02343e-05	5.6238
Ggt5	-1.8853	0.661419	-6.26384	5.92568e-07	1.03157e-05	6.06378
Ugt2b5	-2.07588	-0.142955	-6.26339	5.93322e-07	1.03163e-05	6.07985
Mapk15	-1.93149	2.64188	-6.26159	5.96339e-07	1.03563e-05	5.92553
Apc	1.05641	9.60839	6.25733	6.03561e-07	1.04597e-05	5.47948
Nudt4	-0.9483	7.62147	-6.2569	6.04286e-07	1.04597e-05	5.51609
Etv4	-1.18028	4.25784	-6.25679	6.0448e-07	1.04597e-05	5.68912
Ak7	-1.56234	2.07813	-6.24922	6.17519e-07	1.06612e-05	5.93281
Pdk2	0.828281	6.56771	6.24917	6.17612e-07	1.06612e-05	5.49512
Adamts2	-1.56004	2.90552	-6.2482	6.19305e-07	1.06776e-05	5.90418
Dhx8	0.750207	5.8099	6.24772	6.20146e-07	1.06793e-05	5.55045
Dnah9	-2.19877	3.08952	-6.24708	6.21259e-07	1.06857e-05	5.85892
Zik1	0.818706	5.06675	6.24362	6.27365e-07	1.07778e-05	5.61386
Pcdh19	1.1563	6.30791	6.24258	6.29206e-07	1.07965e-05	5.55896
Fam21	1.19013	5.71156	6.23587	6.41243e-07	1.09899e-05	5.51226
Ttll6	-1.98728	0.511561	-6.23505	6.42728e-07	1.10022e-05	5.97969
Lrrc32	-1.89053	1.94072	-6.23397	6.44686e-07	1.10226e-05	5.88154
Csf1r	-1.99639	2.06266	-6.23049	6.51049e-07	1.1114e-05	5.82731
Slc10a4	1.89353	1.01009	6.2302	6.5158e-07	1.1114e-05	5.96495
Zfp783	2.40702	1.22462	6.22786	6.55892e-07	1.11743e-05	5.9465
Arhgap22	-1.91675	1.6081	-6.21848	6.7351e-07	1.14608e-05	5.85461
Foxn4	-2.05648	0.00839744	-6.21149	6.86937e-07	1.16755e-05	5.93072
Spef2	-1.71392	1.84764	-6.20458	7.00468e-07	1.18914e-05	5.80171
Txnip	1.14214	6.7675	6.19777	7.14069e-07	1.2108e-05	5.32694
Csf1	-1.30368	6.26394	-6.19323	7.23305e-07	1.22501e-05	5.334
Aif1l	0.991382	4.92697	6.19127	7.27313e-07	1.23035e-05	5.44256
C3ar1	-1.86996	2.32918	-6.18845	7.33131e-07	1.23873e-05	5.6835
Eef1d	1.1798	5.93029	6.1855	7.39264e-07	1.24763e-05	5.36796
Rbm33	0.927634	5.18644	6.17781	7.55513e-07	1.27355e-05	5.39949
Acss1	0.959837	5.34178	6.17346	7.64866e-07	1.28781e-05	5.34364
Plekhm2	1.32202	5.05805	6.16587	7.81452e-07	1.31419e-05	5.3938
Naalad2	-1.98935	-0.00798867	-6.16522	7.82901e-07	1.31509e-05	5.80475
Cfp	-1.72058	2.08383	-6.16206	7.89913e-07	1.32532e-05	5.68191
Tacc3	-1.01888	4.44266	-6.16119	7.91875e-07	1.32706e-05	5.44456
Lipa	-1.59419	3.75325	-6.16049	7.93425e-07	1.32811e-05	5.49709
Sgcg	2.02358	-0.0489267	6.15916	7.96431e-07	1.33069e-05	5.7997
Cwf19l1	1.14962	3.51458	6.15898	7.96819e-07	1.33069e-05	5.51494
Rnf219	1.01085	4.86243	6.15361	8.0903e-07	1.34912e-05	5.34505
Rnf128	-1.26286	2.88214	-6.1533	8.09737e-07	1.34912e-05	5.61091
Pilra	-1.7078	-0.464297	-6.15209	8.1251e-07	1.35218e-05	5.77779
Arl4c	-0.66109	7.46279	-6.14924	8.19081e-07	1.36153e-05	5.19618
Apbb1ip	-1.74867	2.28697	-6.14461	8.29893e-07	1.37791e-05	5.58995
Cd14	-2.22137	1.11878	-6.13733	8.47151e-07	1.40494e-05	5.69381
Il12rb2	-2.04179	0.49909	-6.13657	8.48988e-07	1.40636e-05	5.72393
Bub1b	-1.04782	4.07555	-6.13244	8.58962e-07	1.42125e-05	5.39735
Pdzk1	1.97811	-0.414143	6.13086	8.62803e-07	1.42596e-05	5.72694
Kif18a	-1.7828	1.21067	-6.12804	8.69726e-07	1.43575e-05	5.66986
Flt1	-1.93736	0.720709	-6.12608	8.74563e-07	1.44207e-05	5.67935
Rhod	-1.50637	2.00852	-6.12404	8.79619e-07	1.44875e-05	5.52922
Lsamp	0.774478	8.92357	6.11992	8.89941e-07	1.46157e-05	5.09645
Zfp536	-1.01483	4.63226	-6.11972	8.90442e-07	1.46157e-05	5.29866
Col10a1	-1.92711	0.289522	-6.11972	8.90454e-07	1.46157e-05	5.64692
Cgnl1	-1.76585	2.66522	-6.11341	9.06497e-07	1.4862e-05	5.48538
Rorc	1.88926	1.08264	6.11257	9.08643e-07	1.48637e-05	5.57972
Eif5b	0.995054	6.09404	6.11256	9.08671e-07	1.48637e-05	5.14642
Slc2a1	-1.10735	6.43599	-6.10904	9.17782e-07	1.49957e-05	5.12341
C1qc	-1.74139	0.441941	-6.10579	9.26268e-07	1.51171e-05	5.61627
Lrrc56	-1.04893	3.91902	-6.10256	9.34775e-07	1.52241e-05	5.30171
Sirt2	0.823926	8.63673	6.1025	9.34944e-07	1.52241e-05	5.04659
Fosl2	1.36819	7.09707	6.10072	9.3966e-07	1.52836e-05	5.09832
Clns1a	0.801756	7.42087	6.09994	9.4173e-07	1.52999e-05	5.06083
Ppib	0.766572	7.08252	6.09793	9.47121e-07	1.53701e-05	5.06246
Cracr2a	1.87317	1.00004	6.09516	9.54574e-07	1.54679e-05	5.56942
Atpif1	-1.45111	-0.332431	-6.09489	9.55301e-07	1.54679e-05	5.62471
Dap	0.915435	4.77834	6.09305	9.60299e-07	1.55313e-05	5.18144
Aldh7a1	0.744167	7.12869	6.08783	9.74609e-07	1.5745e-05	5.02821
Ctnnd2	0.925823	8.67114	6.08721	9.76318e-07	1.57549e-05	5.00724
Cpeb2	0.873409	5.99107	6.0866	9.77997e-07	1.57643e-05	5.11375
Egr1	-1.22783	8.19007	-6.08589	9.79979e-07	1.57785e-05	5.03571
Nr2f2	-0.798523	6.5107	-6.08389	9.85545e-07	1.58504e-05	5.04928
Prkcsh	0.737452	6.68603	6.08273	9.88765e-07	1.58844e-05	5.03383
Kcnq3	1.51153	5.98926	6.07912	9.98954e-07	1.60301e-05	5.13191
AI607873	-1.79841	0.869309	-6.07467	1.01163e-06	1.62083e-05	5.51279
Cd109	-1.79626	3.37784	-6.07426	1.01279e-06	1.62083e-05	5.25707
Reep3	1.05838	5.35295	6.07404	1.01344e-06	1.62083e-05	5.09353
Nhlrc2	1.38943	4.42491	6.07309	1.01615e-06	1.62335e-05	5.20684
Mrvi1	-1.67341	-0.267343	-6.06998	1.02516e-06	1.63593e-05	5.55526
Slc1a3	1.08341	10.3132	6.06606	1.03662e-06	1.65237e-05	4.92568
Rprd1b	0.968824	5.9295	6.06375	1.04342e-06	1.66137e-05	5.02577
Pf4	-1.92523	0.771003	-6.06001	1.05452e-06	1.67719e-05	5.48645
Cbln2	1.11656	4.97371	6.0547	1.07051e-06	1.70074e-05	5.08842
Cd33	-1.49271	0.0751553	-6.05086	1.08223e-06	1.71746e-05	5.4976
Birc7	2.06223	0.262167	6.04882	1.08851e-06	1.72552e-05	5.47547
Jam3	-0.841666	6.09593	-6.04748	1.09265e-06	1.7287e-05	4.94958
Dtl	-1.37351	2.78435	-6.04739	1.09293e-06	1.7287e-05	5.31938
E2f8	-1.35131	3.18487	-6.0398	1.11672e-06	1.7644e-05	5.23747
Cd48	-1.65522	-0.0169816	-6.03806	1.12224e-06	1.77117e-05	5.46203
Ptpn14	-1.17889	3.81545	-6.03577	1.12955e-06	1.78074e-05	5.06959
Vangl1	-1.25146	2.53772	-6.03243	1.1403e-06	1.79573e-05	5.24081
Insig1	-0.988991	7.0235	-6.02879	1.15214e-06	1.81239e-05	4.91738
Tm6sf1	-1.1747	2.72017	-6.02769	1.15574e-06	1.81605e-05	5.2583
Oprm1	2.14248	0.990753	6.02533	1.1635e-06	1.82625e-05	5.40787
Tjp2	1.06417	6.06172	6.02346	1.16968e-06	1.83213e-05	4.88812
3110035E14Rik	1.29261	5.6295	6.02343	1.1698e-06	1.83213e-05	4.95059
Grtp1	1.06151	3.57395	6.02244	1.17307e-06	1.83526e-05	5.15018
Wls	-0.898099	6.75355	-6.0189	1.18492e-06	1.85178e-05	4.84096
Tpm2	-1.72948	2.18919	-6.01309	1.20463e-06	1.88053e-05	5.23589
Nr4a3	1.1844	4.28489	6.00445	1.23452e-06	1.92372e-05	5.06589
Ctsz	-1.42528	4.68566	-6.00432	1.23497e-06	1.92372e-05	4.91705
Zfp729a	1.0576	4.23266	6.00243	1.24161e-06	1.93197e-05	4.99792
Actn4	-1.16499	5.99797	-6.00004	1.25006e-06	1.943e-05	4.81097
Rnd2	0.679493	7.08121	5.99905	1.25357e-06	1.94636e-05	4.78389
Eif2ak3	0.888591	5.78251	5.99793	1.25756e-06	1.95044e-05	4.84163
Casp1	-1.79057	0.860741	-5.99351	1.27343e-06	1.97292e-05	5.3058
Mmp14	1.04048	5.76224	5.99293	1.27553e-06	1.97405e-05	4.83317
Add3	0.988949	8.36078	5.98929	1.28878e-06	1.99241e-05	4.73174
Prrx2	1.95098	1.12049	5.98796	1.29368e-06	1.99783e-05	5.28756
Eva1a	1.34571	3.47612	5.98754	1.29519e-06	1.99802e-05	5.02347
Kif1a	0.858345	10.1816	5.98635	1.2996e-06	2.00266e-05	4.7068
Nme5	-1.42128	3.36414	-5.98394	1.30851e-06	2.01423e-05	5.02617
Lrrc75a	-0.907305	4.23255	-5.97983	1.32386e-06	2.03568e-05	4.94487
9630013A20Rik	1.65634	2.44584	5.97847	1.32901e-06	2.04141e-05	5.143
Mycbp	-1.13312	3.77037	-5.97385	1.34654e-06	2.06614e-05	4.97719
Sqle	-1.03862	8.67676	-5.97018	1.36066e-06	2.08557e-05	4.68425
Fgf13	-0.958289	6.74365	-5.96886	1.36575e-06	2.09114e-05	4.72543
Calm1	-1.02863	11.0825	-5.96774	1.37011e-06	2.09558e-05	4.64392
Arhgap30	-2.12616	0.601544	-5.96666	1.37432e-06	2.09979e-05	5.23536
Adam12	-0.96603	4.0246	-5.9631	1.38827e-06	2.11884e-05	4.94564
Helt	1.84319	0.543965	5.96181	1.39339e-06	2.1244e-05	5.21186
Nfe2l3	1.60813	2.64352	5.96084	1.39724e-06	2.12801e-05	5.15142
Sec14l3	-1.50305	2.88675	-5.95801	1.40851e-06	2.1429e-05	5.11714
Prrg4	-1.26488	2.38362	-5.95726	1.41152e-06	2.14521e-05	5.02551
Nbl1	1.03665	5.89902	5.95544	1.41883e-06	2.15405e-05	4.6938
Pald1	-1.43159	2.43488	-5.9489	1.44544e-06	2.19212e-05	5.1084
Fcgr1	-2.03534	0.643362	-5.94765	1.45056e-06	2.19757e-05	5.16482
Dolk	0.851427	5.77239	5.94473	1.46265e-06	2.21354e-05	4.68475
Sntg2	1.16692	3.22676	5.93835	1.48939e-06	2.25164e-05	4.99004
Ttyh3	1.06084	7.28315	5.9377	1.49215e-06	2.25344e-05	4.61202
Hbegf	-1.32075	4.72341	-5.93516	1.50299e-06	2.26743e-05	4.7496
Mal	-1.82161	1.20238	-5.93105	1.52064e-06	2.29039e-05	5.11389
Tgfbi	-2.09569	1.37996	-5.93087	1.5214e-06	2.29039e-05	5.08916
Spon1	0.79078	7.74778	5.92835	1.53232e-06	2.30442e-05	4.56915
Otx2	-1.45332	3.17456	-5.92553	1.54469e-06	2.32059e-05	4.90476
Crocc2	-1.9606	0.776138	-5.92509	1.54662e-06	2.32107e-05	5.12542
Foxo4	1.24405	4.26611	5.92232	1.55885e-06	2.33561e-05	4.72219
Slfn2	-1.80048	1.08537	-5.92215	1.55957e-06	2.33561e-05	5.08163
Atp6v0d2	2.00718	0.990486	5.92174	1.56141e-06	2.33593e-05	5.11529
Ror1	-1.91925	1.6206	-5.9192	1.57271e-06	2.35039e-05	5.02282
Ptn	0.688829	10.0575	5.91502	1.59153e-06	2.37604e-05	4.50027
Trps1	1.33241	5.92131	5.91211	1.60476e-06	2.3933e-05	4.57668
Shroom3	-1.81913	4.67523	-5.91156	1.60723e-06	2.39451e-05	4.62243
Sox5	0.912004	6.21296	5.91086	1.61044e-06	2.3968e-05	4.59101
Itpr2	1.58548	5.40978	5.90996	1.61456e-06	2.40044e-05	4.63421
Rasd2	-0.90386	4.08126	-5.90775	1.62475e-06	2.41066e-05	4.75083
Iqgap2	-1.48701	4.606	-5.90768	1.62508e-06	2.41066e-05	4.65971
Cyth4	-2.13749	1.43756	-5.90738	1.62647e-06	2.41066e-05	5.00509
Klhdc8a	-1.33206	3.47518	-5.90462	1.63929e-06	2.42717e-05	4.80499
Samhd1	-1.03498	4.20469	-5.9013	1.65484e-06	2.44766e-05	4.7136
Adprhl1	1.59315	-0.103375	5.90083	1.65706e-06	2.44842e-05	5.08345
Morc3	1.47767	4.40206	5.90017	1.66015e-06	2.44893e-05	4.74859
1700003I22Rik	-1.74987	-0.176567	-5.90003	1.66081e-06	2.44893e-05	5.07394
Prom1	-1.24671	4.03346	-5.89618	1.67907e-06	2.47332e-05	4.70788
2610307P16Rik	1.53109	2.13805	5.89342	1.69232e-06	2.49028e-05	4.94585
Top2a	-1.13871	5.59378	-5.89145	1.70184e-06	2.50173e-05	4.56549
Arg2	1.60643	2.7219	5.89064	1.70575e-06	2.50491e-05	4.94968
Ephx2	1.32516	3.41262	5.89002	1.70879e-06	2.50681e-05	4.77086
Dennd3	1.4459	2.26892	5.88947	1.71147e-06	2.50817e-05	4.93365
Unc13c	1.64731	2.1911	5.88631	1.72691e-06	2.52823e-05	4.96281
Psen1	1.085	6.97837	5.88551	1.73081e-06	2.53136e-05	4.47
Aldh9a1	1.51024	4.68766	5.88214	1.74751e-06	2.55318e-05	4.63004
Alx3	-1.75304	-0.18034	-5.88015	1.75744e-06	2.56508e-05	5.02837
Lamp5	-1.47493	2.28625	-5.87727	1.77191e-06	2.57928e-05	4.84844
Ebpl	1.00966	4.88545	5.87715	1.77248e-06	2.57928e-05	4.58252
Stk32b	1.2751	5.43842	5.87714	1.77256e-06	2.57928e-05	4.57547
Mns1	-1.74243	2.75811	-5.86867	1.81575e-06	2.63945e-05	4.77841
Fn1	-1.74333	5.36419	-5.86712	1.82382e-06	2.6485e-05	4.5491
Elmod3	1.00555	4.21482	5.85674	1.87846e-06	2.7251e-05	4.56649
Phlda3	-1.05649	4.98056	-5.85622	1.88124e-06	2.72638e-05	4.46871
Gsta4	0.832607	5.68939	5.85349	1.89591e-06	2.74399e-05	4.40766
Tinagl1	-2.10756	0.00196557	-5.85325	1.89721e-06	2.74399e-05	4.94604
Slc7a3	2.11418	1.22528	5.85113	1.90869e-06	2.75781e-05	4.90758
Cbfb	1.14726	5.78335	5.84985	1.91567e-06	2.76512e-05	4.41424
Sv2b	1.86228	6.5372	5.84929	1.91871e-06	2.76671e-05	4.43886
Cd180	-1.98445	1.75405	-5.84877	1.92157e-06	2.76807e-05	4.78517
Nuf2	-1.143	4.25608	-5.84781	1.92681e-06	2.77283e-05	4.55987
Dyrk3	-1.16965	4.11129	-5.84428	1.9463e-06	2.79808e-05	4.59569
Zfp236	1.44403	3.84699	5.83857	1.97818e-06	2.84107e-05	4.65753
Kifc1	-1.0023	4.41784	-5.83479	1.99959e-06	2.86894e-05	4.49693
Hr	1.11894	3.83984	5.83287	2.01053e-06	2.88176e-05	4.63252
Egfr	1.2091	6.15597	5.83237	2.01339e-06	2.88298e-05	4.33383
Col7a1	-1.75088	1.11704	-5.83187	2.01628e-06	2.88424e-05	4.86006
Dscam	1.12342	5.94753	5.83039	2.02479e-06	2.89354e-05	4.389
Igf1	-1.55566	4.3044	-5.82834	2.03663e-06	2.90756e-05	4.43403
Parvg	-1.69053	0.538731	-5.82781	2.03968e-06	2.90903e-05	4.86343
Ston1	-1.20553	3.75654	-5.81572	2.11116e-06	3.0054e-05	4.44137
Cfap100	-1.69959	2.11101	-5.81535	2.11338e-06	3.0054e-05	4.65834
Ccdc34	-1.09627	5.19963	-5.81532	2.11353e-06	3.0054e-05	4.36827
Tfrc	-0.805173	6.99581	-5.81339	2.12518e-06	3.01897e-05	4.2632
Tctex1d4	-1.597	0.324554	-5.81217	2.13259e-06	3.02651e-05	4.81552
Lrrn1	0.791267	5.86876	5.8111	2.13909e-06	3.03273e-05	4.30889
Tdrp	-1.4261	1.73286	-5.81029	2.14406e-06	3.03678e-05	4.76385
Baz2b	1.44269	3.79373	5.80891	2.15249e-06	3.04573e-05	4.53054
Hnrnpa2b1	-0.882818	9.14344	-5.80484	2.1776e-06	3.07822e-05	4.20045
Ppp1r15b	0.956016	6.46308	5.80368	2.1848e-06	3.08536e-05	4.26757
Ugt8a	1.09696	4.17213	5.79706	2.22638e-06	3.14099e-05	4.42865
Gabrg1	1.34541	4.44953	5.79229	2.25682e-06	3.18081e-05	4.38101
Asap2	0.671605	5.95979	5.79073	2.26688e-06	3.19185e-05	4.25024
Kcnk1	-1.01588	6.08929	-5.78722	2.28968e-06	3.2208e-05	4.22274
Gmpr	-0.87704	4.84663	-5.78479	2.30557e-06	3.23998e-05	4.28156
Fhdc1	-1.10105	2.65155	-5.77835	2.34832e-06	3.29683e-05	4.56908
Pcdh11x	1.0694	5.47231	5.77494	2.37119e-06	3.32495e-05	4.25165
Cyb5r3	-0.675968	8.45448	-5.77468	2.37298e-06	3.32495e-05	4.12007
Rlbp1	0.984335	5.20719	5.77197	2.39139e-06	3.34748e-05	4.25696
Lag3	1.82526	0.558431	5.76721	2.42403e-06	3.38987e-05	4.69818
Calml4	-1.78227	0.714002	-5.76241	2.45744e-06	3.43178e-05	4.68803
Rftn2	1.11499	5.11572	5.76199	2.46035e-06	3.43178e-05	4.20866
Zfp874a	1.35264	3.56484	5.76188	2.46117e-06	3.43178e-05	4.41053
Lhx1	1.75434	0.289858	5.75364	2.51966e-06	3.50992e-05	4.68088
Zfp599	1.72357	0.866777	5.75282	2.52552e-06	3.51468e-05	4.65519
Rbp1	-0.959065	4.19897	-5.75037	2.54321e-06	3.53321e-05	4.258
Fam98a	-0.689892	6.38312	-5.7503	2.54376e-06	3.53321e-05	4.11103
Slc44a5	-0.84553	4.25494	-5.7498	2.54733e-06	3.53476e-05	4.25588
Csf2rb2	-1.76832	0.770582	-5.74645	2.57178e-06	3.56525e-05	4.61454
Ube2t	-1.42491	2.82641	-5.74556	2.57837e-06	3.56855e-05	4.49478
Spag9	0.76674	8.50638	5.74545	2.57913e-06	3.56855e-05	4.03625
Crhbp	1.47223	2.50681	5.74314	2.59619e-06	3.58869e-05	4.47432
Parpbp	-1.48235	1.97423	-5.73991	2.62024e-06	3.61846e-05	4.53456
Xaf1	-2.0822	0.125622	-5.73928	2.62489e-06	3.62139e-05	4.62055
Tmem119	-1.64841	0.125015	-5.73691	2.64269e-06	3.64245e-05	4.62758
Mrap2	1.68271	0.88877	5.73481	2.65861e-06	3.66088e-05	4.60258
Tap2	-1.31294	3.52223	-5.73303	2.67215e-06	3.67599e-05	4.28077
Aldh3b1	-1.65127	2.57057	-5.73252	2.67598e-06	3.67774e-05	4.39113
Gng7	-1.25956	6.12651	-5.72459	2.73721e-06	3.7583e-05	4.07776
Thbs4	1.98551	-0.203566	5.72413	2.74081e-06	3.75965e-05	4.60412
Cubn	-1.7641	0.190524	-5.72063	2.76828e-06	3.7903e-05	4.57207
Cspg5	0.635454	9.52305	5.72061	2.76843e-06	3.7903e-05	3.95244
Fam114a1	-1.62785	2.02114	-5.71968	2.77581e-06	3.79679e-05	4.44272
Hnrnpa0	1.48533	5.84794	5.7113	2.84292e-06	3.88393e-05	4.03677
Gucy2f	1.89969	-0.104954	5.71106	2.84493e-06	3.88393e-05	4.56544
Tcf19	-1.65603	2.37483	-5.70964	2.85641e-06	3.8959e-05	4.40104
Tagln3	0.784023	7.95528	5.70611	2.88532e-06	3.93159e-05	3.94095
Upf1	0.783982	6.14862	5.70455	2.89818e-06	3.94537e-05	3.9843
Cdh5	-1.53418	0.343421	-5.70378	2.90463e-06	3.94771e-05	4.54472
Gm26512	1.85683	0.673568	5.70368	2.9054e-06	3.94771e-05	4.49364
Ifih1	-1.6633	1.50121	-5.69897	2.94473e-06	3.99737e-05	4.42119
Slc5a7	1.83996	0.469689	5.69773	2.95513e-06	4.0077e-05	4.51333
Rgl1	-0.64088	6.91866	-5.69666	2.96416e-06	4.01616e-05	3.94318
Bmp7	-0.918368	4.74504	-5.6944	2.98338e-06	4.03838e-05	4.08401
Sostdc1	-1.20442	3.51422	-5.68943	3.02597e-06	4.0906e-05	4.24588
Riiad1	-1.46075	2.59959	-5.68924	3.02765e-06	4.0906e-05	4.30871
Cenpm	-1.06778	3.69459	-5.68818	3.0368e-06	4.09911e-05	4.18915
Cnot6	1.24359	6.79472	5.68121	3.09774e-06	4.17744e-05	3.89121
Nfam1	-1.8198	0.255081	-5.67944	3.11349e-06	4.19474e-05	4.46148
Ccdc9	0.965816	5.46953	5.67855	3.12141e-06	4.20147e-05	3.94665
Plin2	-1.0441	5.55107	-5.67815	3.12498e-06	4.20234e-05	3.91083
Otud4	0.959069	5.12014	5.67767	3.12924e-06	4.20412e-05	3.97783
Rnpep	-0.805832	4.62426	-5.67366	3.1652e-06	4.24847e-05	4.04307
Zic2	1.11978	5.13689	5.67286	3.17248e-06	4.25426e-05	3.98944
Casp4	-1.36783	-0.438343	-5.67065	3.19258e-06	4.27723e-05	4.45657
Itga1	-1.62115	3.18923	-5.66856	3.21161e-06	4.29754e-05	4.1122
Rpgr	-0.994922	4.77432	-5.66833	3.21373e-06	4.29754e-05	3.98287
Elovl7	1.0365	3.22479	5.66721	3.22408e-06	4.30737e-05	4.14051
Sox4	0.842319	8.75468	5.66677	3.22807e-06	4.30869e-05	3.81012
Scn1a	-1.14303	4.12253	-5.66331	3.26015e-06	4.34748e-05	4.10383
Olfml3	-1.86836	1.94683	-5.66092	3.28244e-06	4.37314e-05	4.28312
Havcr2	-1.81754	-0.115195	-5.65973	3.29361e-06	4.38395e-05	4.41081
Zfp142	1.06314	5.07464	5.65919	3.29872e-06	4.38668e-05	3.98805
Cd74	-1.75885	0.513964	-5.65558	3.33289e-06	4.42803e-05	4.36573
Ttc1	1.33631	4.87455	5.65485	3.33983e-06	4.43315e-05	3.97726
Cdk19	0.719822	7.02102	5.65327	3.35491e-06	4.44905e-05	3.80741
Cfap43	-1.80041	0.60813	-5.64891	3.39688e-06	4.49992e-05	4.35539
Efcab12	-1.86985	1.53733	-5.64864	3.39953e-06	4.49992e-05	4.27302
Ctnna3	-1.53436	1.53376	-5.6465	3.42041e-06	4.52338e-05	4.31122
Cfap61	-1.432	2.42078	-5.64495	3.43556e-06	4.53924e-05	4.21465
Rbm24	-0.999912	4.42668	-5.64444	3.44057e-06	4.54167e-05	3.9985
E130114P18Rik	0.968344	5.07986	5.64411	3.44384e-06	4.54182e-05	3.87915
Ctla2a	-2.10832	0.479086	-5.6436	3.44878e-06	4.54417e-05	4.34048
Fut9	0.918762	6.06121	5.64237	3.46098e-06	4.55606e-05	3.83004
Insl6	-1.66724	1.21898	-5.64163	3.46829e-06	4.5615e-05	4.25543
Tmem163	1.07418	5.04272	5.63779	3.50649e-06	4.60753e-05	3.9288
Axin1	0.792591	5.48482	5.63424	3.54219e-06	4.65018e-05	3.85503
Ajuba	-1.19152	3.1838	-5.63216	3.56327e-06	4.67358e-05	3.91987
Ttll9	-1.63616	1.29175	-5.62338	3.65378e-06	4.78793e-05	4.23436
Cnpy3	0.771182	5.70677	5.62065	3.6824e-06	4.82103e-05	3.76623
Cdca8	-1.01614	4.02182	-5.61838	3.70627e-06	4.84785e-05	3.95662
Saa3	-2.09321	-0.129737	-5.61644	3.72686e-06	4.87035e-05	4.27819
Gm973	-1.43676	4.43254	-5.61572	3.73454e-06	4.87596e-05	3.83429
Trem2	-2.04559	3.0906	-5.61238	3.77033e-06	4.91821e-05	3.96564
Scrn1	-0.630027	8.01264	-5.61169	3.7778e-06	4.92348e-05	3.66425
F11r	-1.73241	1.28648	-5.60946	3.80191e-06	4.95041e-05	4.19682
Tbx20	-2.00464	-0.0554979	-5.60662	3.83285e-06	4.98617e-05	4.25895
Sall3	0.96249	5.55979	5.60619	3.83759e-06	4.98783e-05	3.77092
1700016K19Rik	-1.34302	2.28964	-5.60586	3.84126e-06	4.98808e-05	4.14546
Rexo1	0.862439	5.41162	5.60427	3.85875e-06	5.00371e-05	3.78254
Scg2	1.05684	7.59337	5.60413	3.86026e-06	5.00371e-05	3.6451
Ctf1	-1.35401	-0.0405443	-5.6025	3.8783e-06	5.02255e-05	4.24374
Csf3r	-1.52323	-0.0873048	-5.59559	3.95563e-06	5.11808e-05	4.23939
Ybx2	-1.43617	2.14055	-5.59303	3.98459e-06	5.15092e-05	4.09214
Slc25a18	-0.886237	6.01305	-5.5913	4.00438e-06	5.16794e-05	3.65637
Dcaf7	0.762559	9.06168	5.59125	4.00495e-06	5.16794e-05	3.59403
Kirrel	-1.45406	4.49617	-5.58758	4.04707e-06	5.21666e-05	3.7664
Spa17	-1.21166	3.47399	-5.58733	4.04998e-06	5.21666e-05	3.86304
Clcn7	0.832935	5.21012	5.58647	4.05999e-06	5.22487e-05	3.70587
Osgin2	0.949133	4.18212	5.58434	4.08475e-06	5.25006e-05	3.8484
Barx2	1.39561	2.48005	5.58399	4.08889e-06	5.25006e-05	4.08395
Trim66	1.42439	2.35237	5.58385	4.09053e-06	5.25006e-05	4.06276
9230110C19Rik	-0.956997	4.34005	-5.57859	4.15236e-06	5.32128e-05	3.77222
Zfp105	1.04526	3.64049	5.5785	4.15343e-06	5.32128e-05	3.80903
Klf9	0.897008	6.02036	5.57679	4.17381e-06	5.34121e-05	3.6356
Zfp12	0.968327	4.6149	5.57657	4.17642e-06	5.34121e-05	3.787
Nrg2	-0.909559	3.80545	-5.57564	4.1876e-06	5.35074e-05	3.84617
Zbbx	-1.13599	2.53911	-5.57407	4.20637e-06	5.36995e-05	4.01801
Calb2	0.857499	6.62721	5.5732	4.21683e-06	5.37852e-05	3.59096
Cnp	1.17534	7.37783	5.57272	4.22257e-06	5.38107e-05	3.55978
Gm16576	1.59831	1.09673	5.56726	4.28906e-06	5.46094e-05	4.08356
Slc12a9	1.21618	3.17088	5.55965	4.38334e-06	5.57604e-05	3.92496
Cyhr1	1.11678	4.18537	5.55812	4.40248e-06	5.59544e-05	3.73731
Tlr4	-1.68369	0.577728	-5.55722	4.4138e-06	5.60486e-05	4.09496
Wee1	-1.01814	3.84212	-5.5517	4.48402e-06	5.689e-05	3.76057
Tril	0.822147	5.73461	5.55087	4.49467e-06	5.69748e-05	3.56178
Lonrf3	1.38766	3.64772	5.54888	4.52029e-06	5.7249e-05	3.81145
Kcna4	1.22059	4.115	5.54849	4.52537e-06	5.72629e-05	3.78553
Plekhd1	2.10401	1.0558	5.54537	4.56584e-06	5.77241e-05	4.0861
Pld5	-1.4227	1.8672	-5.54376	4.58699e-06	5.79404e-05	3.99364
Crym	2.32755	4.87943	5.5431	4.59562e-06	5.79739e-05	3.79536
Gstt1	-1.43721	2.45366	-5.54294	4.59771e-06	5.79739e-05	3.87277
Slco3a1	-1.04404	5.64245	-5.54049	4.62996e-06	5.83294e-05	3.5951
Ccdc97	0.700042	6.11053	5.53889	4.65123e-06	5.84974e-05	3.52537
Ephb4	-1.21717	2.69167	-5.53887	4.65145e-06	5.84974e-05	3.84315
Rrm2	-0.852745	5.97895	-5.53772	4.66674e-06	5.86384e-05	3.52743
Pcif1	0.926964	6.21359	5.53647	4.68349e-06	5.87975e-05	3.50133
4833427G06Rik	-1.80764	0.741101	-5.53465	4.70792e-06	5.90526e-05	4.0245
E030003E18Rik	-1.52357	3.13676	-5.532	4.74373e-06	5.94498e-05	3.77271
Ddx46	0.651781	7.03771	5.52919	4.78201e-06	5.98773e-05	3.45629
P4ha2	-1.29798	3.71435	-5.52012	4.90752e-06	6.13953e-05	3.75478
Ehbp1	0.812426	5.91793	5.51722	4.94837e-06	6.18525e-05	3.47402
Usp36	0.764789	4.94956	5.51477	4.98321e-06	6.22337e-05	3.56097
Lgals3	-2.08829	2.24258	-5.513	5.00846e-06	6.24948e-05	3.81132
Ncf2	-2.03627	1.49653	-5.51218	5.02016e-06	6.25864e-05	3.86789
Lhx9	1.46308	0.340537	5.51102	5.03695e-06	6.26973e-05	4.00967
Palld	-1.33752	6.42908	-5.51096	5.03779e-06	6.26973e-05	3.40721
Ext2	-0.593654	6.00505	-5.5091	5.06459e-06	6.29763e-05	3.43732
Ercc6l	-1.49409	1.12694	-5.5039	5.14041e-06	6.38638e-05	3.93339
Efhc1	-1.27264	2.08776	-5.50237	5.16306e-06	6.40898e-05	3.81259
Ccnt1	0.84524	5.87697	5.49499	5.27307e-06	6.53988e-05	3.39627
Mfap2	0.910432	5.55614	5.49274	5.30707e-06	6.57375e-05	3.40078
Ppp1r10	0.805082	6.81807	5.49258	5.30953e-06	6.57375e-05	3.3648
Nos1	1.07667	5.22579	5.49116	5.3312e-06	6.59489e-05	3.50163
Ehd1	-0.625831	6.86602	-5.48809	5.37814e-06	6.64724e-05	3.35185
Cd84	-1.51938	0.0388658	-5.48129	5.48381e-06	6.77201e-05	3.92391
Rfxank	1.0168	3.94235	5.48057	5.49503e-06	6.78004e-05	3.53012
Fdft1	-0.98335	8.00149	-5.47916	5.51721e-06	6.80156e-05	3.29936
Mc5r	1.50143	0.69167	5.47741	5.54487e-06	6.8298e-05	3.87989
Cdc42ep5	-1.66559	-0.209062	-5.47616	5.56473e-06	6.84674e-05	3.90869
Cmtm4	0.769985	6.69902	5.47595	5.56816e-06	6.84674e-05	3.31013
Src	0.901342	6.79231	5.47136	5.64176e-06	6.93131e-05	3.29215
Rgs1	-1.57613	0.124207	-5.47075	5.65153e-06	6.93738e-05	3.89019
Sh3gl3	0.905412	6.07469	5.46935	5.67426e-06	6.95933e-05	3.33384
Slc19a1	0.902754	5.1786	5.46742	5.70565e-06	6.99186e-05	3.38871
Adgre5	-1.01079	3.099	-5.46527	5.7408e-06	7.02893e-05	3.58601
Tmem176a	-1.46988	3.09847	-5.4612	5.80794e-06	7.10508e-05	3.57715
Lrrc47	0.782142	6.84905	5.46027	5.8235e-06	7.11805e-05	3.26219
Dusp16	0.90746	4.48064	5.45987	5.83023e-06	7.12021e-05	3.43087
Zfp74	0.894276	4.06875	5.45746	5.8705e-06	7.16044e-05	3.49308
Galnt16	0.721743	6.87932	5.4573	5.87314e-06	7.16044e-05	3.25087
Tmem212	-1.70938	0.995536	-5.45637	5.8888e-06	7.17345e-05	3.80314
Cd300lf	-1.41779	-0.467289	-5.45599	5.89527e-06	7.17524e-05	3.86026
Mrc1	-1.71133	1.19559	-5.45105	5.97915e-06	7.27117e-05	3.78152
Fgl2	-1.49297	2.58119	-5.44937	6.00783e-06	7.29987e-05	3.65639
A230050P20Rik	-0.8752	5.03166	-5.44641	6.05901e-06	7.35584e-05	3.37562
Cdkn2c	-0.89926	4.47703	-5.44575	6.07036e-06	7.36339e-05	3.37222
Calcrl	1.44738	2.53753	5.44345	6.11046e-06	7.40505e-05	3.67003
Ccng2	0.713147	6.72232	5.44319	6.11502e-06	7.40505e-05	3.23316
Gstm4	1.21414	3.54261	5.44052	6.16184e-06	7.45547e-05	3.54839
Tmem115	0.854224	5.89723	5.43951	6.17964e-06	7.4707e-05	3.24788
P2ry13	-1.59574	-0.00872833	-5.4379	6.20818e-06	7.4989e-05	3.79464
AI837181	1.01973	5.47714	5.43739	6.21731e-06	7.50361e-05	3.27187
Plin4	1.98749	0.820611	5.43331	6.29032e-06	7.58535e-05	3.74319
Pear1	-1.81569	0.671649	-5.4293	6.36284e-06	7.66636e-05	3.7557
Cldnd1	0.74237	7.57843	5.42733	6.39871e-06	7.70312e-05	3.14718
Cpz	-1.7728	0.524628	-5.42151	6.50628e-06	7.82606e-05	3.74768
Prl7a1	-1.64352	-0.362668	-5.42107	6.51438e-06	7.82925e-05	3.7593
Cacna1g	-1.05496	4.68081	-5.42043	6.52642e-06	7.83716e-05	3.39656
Phtf1	-1.0084	4.31934	-5.41742	6.58279e-06	7.89824e-05	3.35308
Cfap221	-1.58433	0.615489	-5.41598	6.60996e-06	7.92422e-05	3.71512
Rnf32	-1.14655	3.6824	-5.41504	6.62783e-06	7.93903e-05	3.43198
Plppr5	0.974541	4.93067	5.41392	6.64894e-06	7.95767e-05	3.25996
Lyn	-2.05123	1.41067	-5.41362	6.65479e-06	7.95805e-05	3.65044
Prtg	-1.60546	1.37758	-5.41049	6.71455e-06	8.02282e-05	3.56516
Draxin	0.815401	5.11465	5.40953	6.73303e-06	8.03822e-05	3.2655
Cxxc5	-0.764277	6.2454	-5.40678	6.78623e-06	8.095e-05	3.11563
Zdhhc12	0.875801	3.76982	5.40559	6.80932e-06	8.1158e-05	3.3602
Ccdc81	-1.44097	1.19461	-5.4025	6.8699e-06	8.18122e-05	3.6406
Tmem101	0.845006	5.36289	5.40198	6.88006e-06	8.18654e-05	3.17234
Rnf14	-0.769618	8.4176	-5.40139	6.89172e-06	8.19361e-05	3.05966
Gm3693	-1.29873	2.48567	-5.399	6.93901e-06	8.24019e-05	3.54129
Cdca3	-1.00495	3.96076	-5.39883	6.94237e-06	8.24019e-05	3.34042
Gata2	-1.58	0.167851	-5.3946	7.02691e-06	8.33365e-05	3.66558
Fbxw8	0.61425	6.83484	5.39259	7.06737e-06	8.37472e-05	3.07372
Npnt	-0.797151	5.52158	-5.39075	7.10475e-06	8.41207e-05	3.14133
Cdr2	-1.19809	3.68835	-5.38972	7.12563e-06	8.42984e-05	3.3915
Pls1	1.49516	2.11919	5.38654	7.19069e-06	8.49981e-05	3.53592
Rabl2	-0.832841	5.36145	-5.385	7.22257e-06	8.53047e-05	3.12336
Slc14a2	-1.30319	1.6835	-5.38348	7.25397e-06	8.56052e-05	3.54541
Ahrr	1.7919	0.273886	5.38232	7.2781e-06	8.58194e-05	3.65641
2310015A10Rik	1.50138	2.19287	5.38091	7.30757e-06	8.60963e-05	3.46548
Lrrc16a	0.827575	6.32772	5.37466	7.43931e-06	8.75766e-05	3.04612
Twist1	-1.91318	0.506291	-5.37248	7.48589e-06	8.80527e-05	3.60833
Phf12	0.774166	6.29698	5.37197	7.49696e-06	8.81107e-05	3.02712
Dnal1	-0.731405	6.67733	-5.37118	7.51377e-06	8.82362e-05	3.02526
Nek5	-1.55854	1.85233	-5.37053	7.52788e-06	8.83296e-05	3.45874
Crtac1	-0.885082	5.48013	-5.36814	7.57939e-06	8.88614e-05	3.07308
Rbm7	1.14191	6.29522	5.3675	7.59342e-06	8.89532e-05	3.0231
Cacna2d3	-0.943319	6.22084	-5.3651	7.64576e-06	8.94934e-05	3.026
Spata6	-1.02045	4.08522	-5.36412	7.66721e-06	8.96713e-05	3.14986
Pttg1ip	0.900349	6.17008	5.36204	7.71297e-06	9.01332e-05	2.99521
Rasal3	-1.7436	-0.0947916	-5.36029	7.7516e-06	9.04676e-05	3.58018
Nrp1	-1.00656	4.751	-5.36018	7.75419e-06	9.04676e-05	3.14216
Cyp2j6	1.11051	4.04073	5.35896	7.78111e-06	9.0708e-05	3.22513
Racgap1	-1.14347	5.54265	-5.35807	7.80099e-06	9.0866e-05	3.04148
Cnst	0.757035	4.93341	5.35727	7.81903e-06	9.09489e-05	3.09838
Tac1	1.6157	2.19026	5.35718	7.82089e-06	9.09489e-05	3.39982
Ddx23	0.70855	7.33611	5.35691	7.8271e-06	9.09489e-05	2.94677
Ankrd66	-1.51384	1.27443	-5.35606	7.84599e-06	9.10145e-05	3.47441
Myo10	-1.33216	2.45575	-5.3559	7.84959e-06	9.10145e-05	3.39015
Surf6	0.761725	4.79282	5.35563	7.85582e-06	9.10145e-05	3.10877
Casc5	-1.0451	2.86325	-5.35552	7.8581e-06	9.10145e-05	3.38003
Fermt3	-1.54356	0.864465	-5.35335	7.90714e-06	9.15088e-05	3.50395
Kif11	-1.36829	3.53743	-5.35271	7.92163e-06	9.16027e-05	3.29594
Dcakd	0.678378	7.45753	5.35086	7.96366e-06	9.19874e-05	2.92644
Cyr61	-1.36028	6.84817	-5.35068	7.96772e-06	9.19874e-05	2.95265
Tnfaip6	-1.08728	2.61007	-5.34644	8.06507e-06	9.30366e-05	3.30785
Sh3d21	1.44486	0.0112957	5.34453	8.10928e-06	9.34715e-05	3.54482
Cd82	-1.44298	2.47863	-5.34421	8.11671e-06	9.34822e-05	3.38224
Adrbk2	1.00051	5.13153	5.34061	8.2007e-06	9.43737e-05	3.04667
Rhobtb3	0.699831	6.53631	5.33748	8.2746e-06	9.5148e-05	2.91642
Fiz1	1.25635	4.23567	5.33618	8.30538e-06	9.54255e-05	3.1099
Asph	0.703069	8.10186	5.33472	8.34001e-06	9.57468e-05	2.8729
Rgs9bp	1.62675	0.684946	5.33422	8.35204e-06	9.57507e-05	3.47545
Pde4dip	0.795201	8.35723	5.33415	8.35368e-06	9.57507e-05	2.86854
Ttc21a	-2.00267	1.3792	-5.33261	8.39067e-06	9.60979e-05	3.4274
Soga1	0.787548	6.7493	5.32948	8.46615e-06	9.68852e-05	2.90249
Tmem64	-0.827811	5.39346	-5.32571	8.5579e-06	9.78571e-05	2.97765
Pdlim4	0.891953	4.77973	5.3248	8.58021e-06	9.80341e-05	3.01918
Ddx60	-1.4304	-0.332996	-5.32186	8.65277e-06	9.87846e-05	3.48939
4930405A21Rik	1.56817	1.0141	5.32135	8.66543e-06	9.88507e-05	3.38923
Lst1	-1.50104	1.40207	-5.32011	8.69608e-06	9.91215e-05	3.36469
Acox1	0.713563	7.80463	5.31534	8.81571e-06	0.000100405	2.81905
Dbx2	1.3812	1.7507	5.3119	8.90299e-06	0.000101319	3.3307
Ntn1	-2.05548	4.91787	-5.31156	8.91156e-06	0.000101336	2.95599
Ddx56	0.928354	4.84649	5.31066	8.93453e-06	0.000101517	2.99013
Daxx	0.798466	4.52089	5.31015	8.94764e-06	0.000101586	3.01272
Rasa1	-1.08183	5.27029	-5.30682	9.0332e-06	0.000102476	2.96154
Cenpa	-0.913421	4.23211	-5.30622	9.04873e-06	0.000102571	3.02673
Selplg	-1.67983	0.296905	-5.3018	9.16394e-06	0.000103795	3.41061
Rbm47	-1.91027	0.735337	-5.30061	9.19529e-06	0.000104068	3.37693
Flcn	0.684429	6.20375	5.29977	9.21748e-06	0.000104237	2.84233
Ak1	-0.694	7.58523	-5.2979	9.26689e-06	0.000104714	2.77326
Hist1h1b	-0.834366	6.26623	-5.2974	9.28019e-06	0.000104781	2.84356
Actr3	-0.629164	8.68201	-5.2959	9.32011e-06	0.00010515	2.75521
Nfil3	0.939206	5.17738	5.2953	9.33621e-06	0.000105249	2.92486
Colec12	-1.76374	0.147941	-5.29288	9.40111e-06	0.000105897	3.39384
Snx12	0.684211	6.83218	5.2875	9.54687e-06	0.000107455	2.76712
Tnfsf18	-1.53763	-0.305151	-5.28669	9.56904e-06	0.00010762	3.38299
Coq6	1.01303	3.9612	5.28443	9.63119e-06	0.000108234	3.02194
Atg7	0.641906	5.84503	5.28149	9.71258e-06	0.000109063	2.79375
2210011C24Rik	-1.78487	-0.138049	-5.28058	9.73795e-06	0.000109263	3.36112
Cast	-1.28642	2.85317	-5.27958	9.76573e-06	0.000109489	3.11661
Mxd1	1.04193	4.87465	5.27839	9.79898e-06	0.000109776	2.89426
Serpinb6b	-1.65241	0.802997	-5.27783	9.81475e-06	0.000109867	3.27357
Siglec1	-1.88249	0.123797	-5.27674	9.84555e-06	0.000110126	3.34318
Asb3	0.815324	5.66599	5.27637	9.85598e-06	0.000110157	2.78957
Dse	-1.09402	3.16117	-5.27605	9.86479e-06	0.00011017	3.10656
Pdlim7	-1.1008	6.30317	-5.27162	9.99068e-06	0.000111489	2.74283
Icam5	-1.17314	4.97627	-5.2704	1.00258e-05	0.000111793	2.86431
Lrrc8c	-0.79894	5.83526	-5.26937	1.00552e-05	0.000112035	2.77215
Fbxo7	0.685162	4.67552	5.2641	1.0208e-05	0.000113649	2.8454
Gatm	0.81705	6.24852	5.26323	1.02336e-05	0.000113846	2.73932
Rgl2	-1.16014	3.56604	-5.26222	1.02632e-05	0.000114087	3.00578
Spata24	-1.11746	2.49689	-5.25882	1.03636e-05	0.000115114	3.1068
Steap4	-1.52221	-0.306218	-5.25829	1.03792e-05	0.000115198	3.31066
Spp1	-1.63585	4.64683	-5.25645	1.04342e-05	0.000115719	2.82717
Sgol2a	-0.904525	3.49604	-5.25539	1.04657e-05	0.000115979	2.98998
Lyl1	-1.71427	0.0132625	-5.25476	1.04847e-05	0.0001161	3.28061
H2afx	-0.88792	6.65217	-5.25205	1.05663e-05	0.000116914	2.67709
Smtn	-1.27443	2.60647	-5.24951	1.06436e-05	0.000117677	3.06649
Clec2d	-1.61907	0.490298	-5.24785	1.06941e-05	0.000118117	3.23848
Akr1b8	-1.43783	0.737872	-5.24767	1.06997e-05	0.000118117	3.23435
Snx15	0.814578	4.81434	5.24715	1.07157e-05	0.000118128	2.8067
Serinc5	0.787167	6.8886	5.24709	1.07173e-05	0.000118128	2.64732
Sorbs2	-0.734451	7.7412	-5.24367	1.08229e-05	0.000119201	2.61724
Got1l1	-1.68362	0.597809	-5.24297	1.08445e-05	0.000119347	3.23462
Htr3a	-1.62654	4.00804	-5.24182	1.08803e-05	0.00011965	2.88538
Zfp629	0.81482	4.95687	5.24152	1.08895e-05	0.00011966	2.78692
Plekha7	-0.915049	4.06464	-5.24118	1.09001e-05	0.000119685	2.85106
Il6st	1.19617	7.55043	5.23392	1.11291e-05	0.000122105	2.58779
2610301B20Rik	-0.643233	6.30618	-5.23283	1.11638e-05	0.000122392	2.6231
Sspn	1.11646	3.48961	5.23214	1.11859e-05	0.000122542	2.85128
Plk4	-0.758791	4.05172	-5.23126	1.1214e-05	0.000122756	2.83349
Isoc2a	1.13498	2.96269	5.23002	1.12541e-05	0.0001231	2.99904
Mast4	1.01227	4.45164	5.2287	1.12966e-05	0.000123471	2.88079
Frem1	-1.78722	1.53589	-5.22591	1.13873e-05	0.000124369	3.12707
9030617O03Rik	-0.906129	4.08668	-5.22515	1.14121e-05	0.000124544	2.76144
Serping1	-1.95771	0.829404	-5.22299	1.14828e-05	0.000125221	3.15658
Cdr1	1.15207	9.07256	5.22215	1.15104e-05	0.000125427	2.53793
Prkcd	-1.1464	2.89353	-5.21824	1.164e-05	0.000126673	2.97993
Gipc1	0.73841	7.31787	5.21817	1.16424e-05	0.000126673	2.55302
Irf8	-1.65685	1.98685	-5.21639	1.17019e-05	0.000127166	3.0053
Plvap	-1.16155	3.75184	-5.21628	1.17055e-05	0.000127166	2.87323
Cfap69	-0.888463	2.75636	-5.21361	1.17953e-05	0.000128045	2.92321
Sstr4	1.27827	4.80868	5.21307	1.18135e-05	0.000128147	2.78115
Ntrk1	1.93501	0.825317	5.21008	1.1915e-05	0.000129034	3.16805
Plekhh2	-1.92994	1.43413	-5.21006	1.19155e-05	0.000129034	3.08202
Cramp1l	0.871593	6.03584	5.2098	1.19244e-05	0.000129034	2.59389
Col9a1	1.52236	1.80664	5.2096	1.19313e-05	0.000129034	3.04189
Adgrb3	0.822168	6.7784	5.2073	1.20103e-05	0.000129791	2.56059
Gpr68	1.41293	1.23159	5.20654	1.20362e-05	0.000129973	3.12572
Gcc1	0.847578	4.56623	5.20609	1.20519e-05	0.000130045	2.69673
Man2a1	-0.870987	3.28994	-5.20345	1.21432e-05	0.000130931	2.89048
Sgms1	-0.762054	5.39236	-5.20308	1.21561e-05	0.000130972	2.60301
Apbb2	-0.872745	5.42856	-5.20251	1.21758e-05	0.000131086	2.63995
Herpud2	0.740984	5.82921	5.20067	1.22402e-05	0.00013162	2.56444
Fam19a2	-0.948259	6.94346	-5.20057	1.22437e-05	0.00013162	2.52963
Dync2li1	-0.798487	4.99867	-5.19923	1.22909e-05	0.00013184	2.62355
Net1	1.06311	4.75905	5.19922	1.22911e-05	0.00013184	2.6521
Qtrtd1	0.880907	4.37187	5.19901	1.22984e-05	0.00013184	2.68335
Plat	-0.703425	7.36654	-5.19894	1.23009e-05	0.00013184	2.49481
Ms4a6b	-1.542	0.0886978	-5.19549	1.24232e-05	0.000133051	3.12173
Plp1	1.10109	6.60192	5.19477	1.24486e-05	0.000133224	2.50811
Hexb	-1.38725	5.89836	-5.19401	1.24759e-05	0.000133417	2.51836
Fam183b	-1.64556	1.47928	-5.19359	1.24908e-05	0.000133477	3.03075
Ubiad1	0.769231	4.33126	5.1922	1.25404e-05	0.000133908	2.63305
Tmem196	1.19514	2.50975	5.19019	1.26129e-05	0.000134582	2.95674
Tcf7	-1.68584	0.407093	-5.18919	1.26492e-05	0.000134868	3.06796
Slfn9	-1.60163	2.02238	-5.18623	1.27568e-05	0.000135915	2.9776
Resp18	1.99053	2.05809	5.18426	1.28289e-05	0.000136582	3.03133
Ppp3cb	-1.05369	6.2049	-5.18246	1.2895e-05	0.000137184	2.51978
Prkar2b	-0.947969	5.24971	-5.17855	1.30401e-05	0.000138624	2.57395
Gli2	1.2056	2.8232	5.17728	1.30875e-05	0.000139026	2.83942
Vps37b	0.66068	6.60428	5.17698	1.30991e-05	0.000139046	2.46124
Matn4	1.66634	1.7832	5.1721	1.32831e-05	0.000140805	3.01248
Kcne1l	-1.33806	3.89386	-5.17207	1.32844e-05	0.000140805	2.63276
Trp53cor1	-1.28376	1.51616	-5.17056	1.33418e-05	0.000141309	2.89198
Ctsd	-0.967653	10.3675	-5.16769	1.3452e-05	0.000142371	2.36462
Cdkn2a	-1.22612	1.75351	-5.16616	1.35109e-05	0.00014289	2.92044
Gatad2b	0.680638	7.57412	5.16276	1.36428e-05	0.000144125	2.39598
C5ar1	-1.65911	0.186306	-5.16264	1.36478e-05	0.000144125	3.01188
Snx22	1.91372	1.54968	5.16108	1.37086e-05	0.000144574	2.95094
Catip	-1.5588	1.20215	-5.16104	1.37104e-05	0.000144574	2.94134
Mpzl1	0.795094	6.90885	5.15778	1.3839e-05	0.000145823	2.39164
Gadd45g	1.13617	6.13902	5.15286	1.4035e-05	0.000147769	2.40716
Zfp128	1.06159	3.48933	5.15263	1.40443e-05	0.000147769	2.67726
Stt3a	0.898628	6.31455	5.14696	1.42742e-05	0.000150078	2.37957
Pdpn	-0.914447	6.72406	-5.14464	1.4369e-05	0.000150964	2.34815
Ccno	-1.25167	2.90327	-5.13909	1.4599e-05	0.000153268	2.63924
Cd86	-1.81122	-0.087494	-5.13806	1.46424e-05	0.000153612	2.95998
Ahnak	-2.13683	5.03808	-5.13656	1.47051e-05	0.000154157	2.41418
Kcnn2	0.928712	4.60136	5.13518	1.47633e-05	0.000154654	2.52783
Spag6l	-1.25006	3.65544	-5.13397	1.48148e-05	0.00015508	2.63373
Zscan25	0.856835	4.79976	5.13199	1.48989e-05	0.000155847	2.47201
Fip1l1	1.10231	7.76084	5.13054	1.49608e-05	0.00015638	2.29637
Naip2	-1.62659	0.42749	-5.12882	1.50344e-05	0.000157036	2.91853
Dpyd	1.29625	2.07801	5.12765	1.50848e-05	0.000157448	2.81939
Mmgt1	0.675827	6.21698	5.12642	1.51382e-05	0.00015789	2.34271
Bhlhe22	-1.1349	6.67367	-5.12311	1.52825e-05	0.000159279	2.34456
Mis18a	-0.851875	4.31847	-5.12136	1.53589e-05	0.000159959	2.51739
Lix1	-0.670657	6.68174	-5.12004	1.54172e-05	0.00016045	2.29486
Acss2	1.05353	5.73714	5.11891	1.54669e-05	0.000160851	2.40564
Pink1	0.727723	7.80093	5.11654	1.55723e-05	0.00016183	2.25066
1110004E09Rik	-0.835659	3.95097	-5.11413	1.56803e-05	0.000162835	2.5186
Kif22	-1.21891	3.3224	-5.11332	1.57165e-05	0.000163009	2.65005
Chchd1	0.801908	5.40299	5.11325	1.57198e-05	0.000163009	2.36066
Trhr	1.51545	1.25712	5.11148	1.57993e-05	0.000163715	2.84727
Ptprt	0.824876	7.27669	5.11123	1.58108e-05	0.000163716	2.2618
Cry2	0.775742	6.2793	5.10733	1.59883e-05	0.0001654	2.28884
Fndc4	0.681976	6.25296	5.10715	1.59964e-05	0.0001654	2.29179
Gpr12	-1.0056	4.43607	-5.10665	1.60191e-05	0.000165515	2.48687
Entpd5	0.825804	5.6935	5.10484	1.61025e-05	0.000166258	2.29119
Ccdc136	0.73934	5.72944	5.10388	1.61468e-05	0.000166595	2.31448
Tshz1	1.25128	5.18496	5.10275	1.6199e-05	0.000167013	2.31494
Rps14	0.831637	8.34179	5.10231	1.62194e-05	0.000167104	2.2079
Samd10	-0.89855	4.73464	-5.10165	1.625e-05	0.000167207	2.40781
Chia1	-1.78987	1.37094	-5.10159	1.62527e-05	0.000167207	2.79225
Rab29	-1.51097	2.4656	-5.10059	1.62995e-05	0.000167569	2.63536
Map3k2	1.10227	4.51496	5.09939	1.63555e-05	0.000168024	2.45789
Col4a5	-1.26122	3.48438	-5.09866	1.63896e-05	0.000168254	2.51922
Ube3b	0.808624	6.83081	5.09717	1.646e-05	0.000168856	2.22408
Prmt8	-0.900511	6.52814	-5.09499	1.65626e-05	0.000169788	2.24693
Elmsan1	0.834029	5.26195	5.09384	1.66175e-05	0.000170229	2.31065
Reln	-1.29898	7.47568	-5.08744	1.69243e-05	0.000173248	2.17921
Rfx2	-1.05278	3.54442	-5.0854	1.70233e-05	0.000174137	2.41019
Adra1a	1.49717	1.74859	5.0847	1.70576e-05	0.000174364	2.72053
Ythdc1	0.612289	6.39854	5.08385	1.70993e-05	0.000174665	2.20834
Plxnb3	1.60759	2.81085	5.08301	1.71405e-05	0.000174962	2.59326
Tcf4	1.34791	7.64277	5.08014	1.72819e-05	0.00017628	2.15463
Tnfrsf22	1.22472	1.97237	5.07951	1.73128e-05	0.00017647	2.65125
Pkdcc	-0.846717	4.57155	-5.07789	1.73931e-05	0.000177163	2.32914
Acsl6	0.62507	7.10252	5.07493	1.75413e-05	0.000178545	2.16242
Smc2	-0.929325	3.86431	-5.07305	1.76357e-05	0.000179365	2.43442
Selk	0.614169	8.88686	5.07283	1.76468e-05	0.000179365	2.11544
Nrbp2	-0.714525	7.53395	-5.07216	1.76806e-05	0.000179582	2.13834
Abhd2	0.656971	7.68802	5.07168	1.77051e-05	0.000179701	2.13521
Gm13152	-1.32262	2.10268	-5.07144	1.77174e-05	0.000179701	2.63636
Prkch	-1.0041	3.20526	-5.0699	1.77953e-05	0.000180364	2.54271
Itpr1	-0.899166	5.74205	-5.06316	1.81418e-05	0.000183746	2.22217
Sox6	0.720233	7.32563	5.0595	1.83327e-05	0.000185549	2.10424
Tmem231	-0.762008	3.74633	-5.0587	1.83749e-05	0.000185845	2.37565
Wnt9a	-1.18815	2.24664	-5.05796	1.84139e-05	0.000185993	2.57372
Drosha	0.854498	7.64174	5.05793	1.84154e-05	0.000185993	2.08964
Arhgef18	0.703793	5.36716	5.05767	1.8429e-05	0.000186	2.19332
Thap1	0.846012	3.39631	5.05647	1.84926e-05	0.0001865	2.41418
Epsti1	-1.5088	0.254505	-5.05624	1.85045e-05	0.0001865	2.73195
Snx32	-0.596345	6.06644	-5.05443	1.86005e-05	0.000187335	2.14496
Filip1	1.61818	0.102459	5.05369	1.86399e-05	0.0001876	2.73641
Shcbp1	-0.963693	2.96773	-5.05322	1.86652e-05	0.000187723	2.50827
Fhl2	-1.03291	3.3901	-5.05246	1.87057e-05	0.000188	2.43325
Ltc4s	-1.71126	0.0323729	-5.04932	1.88747e-05	0.000189565	2.71151
Stxbp2	-1.05679	3.74343	-5.04835	1.89272e-05	0.00018996	2.39305
Rcan1	0.942648	6.19667	5.04692	1.90044e-05	0.000190601	2.1034
Cachd1	-0.966364	5.03586	-5.04616	1.9046e-05	0.000190885	2.19352
Sh3rf2	-1.54513	0.212804	-5.04488	1.9116e-05	0.000191453	2.68974
Napepld	-1.24794	2.80552	-5.04419	1.91535e-05	0.000191696	2.48236
Clec12a	-1.60479	0.482973	-5.04363	1.9184e-05	0.000191867	2.66657
Cfap46	-1.79608	0.97481	-5.0417	1.92904e-05	0.000192796	2.65579
Pja2	0.73057	8.88011	5.04111	1.93232e-05	0.00019299	2.0265
Ctxn3	-1.58572	0.0326222	-5.04068	1.93466e-05	0.00019309	2.68874
Psat1	-0.646822	7.81637	-5.03854	1.94656e-05	0.000194142	2.03307
Fmnl2	0.871036	5.13243	5.03769	1.9513e-05	0.00019448	2.19494
Pkp2	-1.85604	0.505774	-5.03451	1.96914e-05	0.000196115	2.66519
Ncor1	0.806593	8.27783	5.03412	1.97134e-05	0.000196115	2.01602
Rcn3	-1.02021	3.83927	-5.03404	1.9718e-05	0.000196115	2.2641
Mtss1	-0.602304	8.07591	-5.03362	1.97415e-05	0.000196212	2.01767
Fzd3	-0.733159	7.06452	-5.03295	1.97796e-05	0.000196405	2.04108
Ccl12	-1.1915	-0.373143	-5.03279	1.97882e-05	0.000196405	2.68971
Spsb4	-0.711139	4.13888	-5.02914	1.99961e-05	0.000198331	2.2312
Ehd4	-1.06522	3.43447	-5.02863	2.00254e-05	0.000198485	2.31203
Tiam2	0.647552	6.16731	5.02751	2.00893e-05	0.000198976	2.06382
Ubxn11	-1.12006	3.02019	-5.02712	2.01122e-05	0.000198976	2.36746
Tbc1d9b	0.653437	7.06051	5.02704	2.01165e-05	0.000198976	2.01464
Themis2	-1.48745	-0.145858	-5.02632	2.0158e-05	0.000199249	2.65071
C330027C09Rik	-0.971234	3.54011	-5.02589	2.01831e-05	0.00019936	2.33376
Ost4	0.766828	4.90475	5.02261	2.0373e-05	0.000201071	2.14414
Golm1	-0.692645	5.44038	-5.02242	2.03843e-05	0.000201071	2.06574
Epha8	-1.12347	3.41958	-5.01934	2.05647e-05	0.000202711	2.3993
Col6a3	-1.86024	1.01772	-5.01751	2.06721e-05	0.000203471	2.61429
Nckap5	1.03462	4.77297	5.01732	2.06837e-05	0.000203471	2.17433
Gpr50	1.90457	0.506688	5.01731	2.06843e-05	0.000203471	2.59867
Mirg	-1.2181	3.00779	-5.01542	2.07964e-05	0.000204434	2.36515
Fam216a	-0.742761	6.35368	-5.01495	2.08244e-05	0.000204569	2.01717
4933412E12Rik	-1.30459	1.6969	-5.0145	2.08509e-05	0.000204689	2.48918
Ccdc170	-1.51121	1.50222	-5.01126	2.10452e-05	0.000206456	2.51936
Etv6	0.747508	5.5197	5.01071	2.10785e-05	0.000206641	2.06897
Fscn2	1.57141	1.64074	5.01027	2.11046e-05	0.000206669	2.53188
Sash1	1.24934	5.66836	5.01018	2.11101e-05	0.000206669	2.03346
Akt1s1	0.636634	7.15932	5.0081	2.12363e-05	0.000207763	1.963
Paics	0.532935	7.43631	5.00746	2.12751e-05	0.000208001	1.95125
Mfsd1	0.716955	6.19625	5.00505	2.14223e-05	0.000209297	1.98055
Atoh8	-1.16408	2.96193	-4.99659	2.19465e-05	0.000214188	2.16738
4933407L21Rik	-1.3746	2.42941	-4.9965	2.19527e-05	0.000214188	2.38127
Lrrc43	-1.84884	1.026	-4.99615	2.19744e-05	0.000214228	2.49891
St6galnac2	-1.37677	-0.34525	-4.99591	2.19896e-05	0.000214228	2.57704
Slc16a14	0.791601	4.65588	4.99572	2.20015e-05	0.000214228	2.08894
Mis18bp1	-1.1258	2.67492	-4.99546	2.20176e-05	0.000214239	2.37666
Ccdc102a	-1.24218	2.88608	-4.99437	2.20868e-05	0.000214733	2.28024
Dyrk1a	0.915339	6.81846	4.99418	2.20983e-05	0.000214733	1.94602
Rab30	1.27065	4.00783	4.99322	2.21596e-05	0.000215077	2.20467
Ecel1	1.17018	3.6787	4.99315	2.21636e-05	0.000215077	2.22495
Zfp644	0.795451	5.9629	4.99277	2.21881e-05	0.000215169	1.9821
Scara3	1.11432	3.56402	4.99218	2.22255e-05	0.000215387	2.21727
Psme4	-0.608516	6.12669	-4.99127	2.22835e-05	0.000215803	1.97179
Trpc5	1.78015	3.38945	4.9908	2.23129e-05	0.000215942	2.41137
Cetn4	-1.39492	3.68113	-4.98816	2.24824e-05	0.000217436	2.16093
Pacsin3	0.808455	3.91652	4.98656	2.25855e-05	0.000218286	2.14449
Ndufa2	0.696819	7.78067	4.98393	2.27557e-05	0.000219783	1.87933
Il17rd	1.33733	2.14152	4.9836	2.27769e-05	0.00021984	2.42718
Pgm3	0.623218	5.57133	4.98276	2.2832e-05	0.000220163	1.97501
Uhrf1	-0.924818	4.96926	-4.98262	2.2841e-05	0.000220163	2.03508
Med4	0.629018	5.61004	4.97655	2.32407e-05	0.000223841	1.97048
Dut	-0.690622	6.26867	-4.97636	2.32538e-05	0.000223841	1.92026
Gmfg	-1.36603	-0.492122	-4.97294	2.34821e-05	0.000225888	2.5229
Ccdc146	-2.02275	0.479548	-4.972	2.35451e-05	0.000226342	2.46263
Xkr5	-1.32475	0.612162	-4.96908	2.37427e-05	0.000228089	2.44283
Cbfa2t2	0.728817	5.43465	4.96587	2.39617e-05	0.000230039	1.95584
Rnf112	-1.07621	5.57003	-4.96417	2.40785e-05	0.000231005	1.95664
Inip	0.742198	4.445	4.96348	2.41261e-05	0.000231308	2.02136
Aim1	-1.83703	0.228272	-4.96324	2.41425e-05	0.00023131	2.47298
Fam57b	0.787596	7.34598	4.96283	2.41705e-05	0.000231425	1.8487
D17Wsu92e	0.576737	6.47858	4.95962	2.43936e-05	0.000233405	1.85454
Timm17a	0.590646	6.34941	4.95935	2.44124e-05	0.000233429	1.85393
Fosb	2.357	3.16189	4.95784	2.45182e-05	0.00023426	2.34767
Mtfmt	1.02736	3.43196	4.95764	2.45319e-05	0.00023426	2.13476
Fam63a	0.725744	5.20475	4.9571	2.45701e-05	0.000234386	1.91812
LOC108167586	-1.46108	-0.169585	-4.95699	2.45778e-05	0.000234386	2.47116
2310033P09Rik	1.12443	4.28588	4.95564	2.46723e-05	0.000235132	2.03514
Slc6a1	-0.507902	9.43308	-4.95279	2.48747e-05	0.000236904	1.7669
Trmt1l	-0.956832	3.13606	-4.95193	2.49356e-05	0.000237326	2.14919
Slc25a42	0.874683	3.34397	4.94642	2.53316e-05	0.000240936	2.06593
Dhcr24	-0.968649	5.72194	-4.94607	2.53567e-05	0.000241015	1.9279
Gm26588	1.57545	0.837134	4.94391	2.55141e-05	0.0002422	2.38979
Pdzrn3	1.09024	5.55856	4.9437	2.55291e-05	0.0002422	1.87993
Ifi27l2a	-1.50152	-0.225382	-4.94348	2.55454e-05	0.0002422	2.42959
Nptx1	1.25055	5.11998	4.94343	2.55489e-05	0.0002422	1.93733
Rln1	-1.13731	2.34952	-4.94276	2.55977e-05	0.000242503	2.16047
Hist1h3d	-0.7605	6.14465	-4.93403	2.62442e-05	0.000248464	1.79093
Ptgr1	-1.25227	2.54042	-4.93241	2.63661e-05	0.000249454	2.16791
Neu4	1.75391	-0.032727	4.93182	2.64106e-05	0.00024971	2.40852
Ubash3b	-0.611969	6.17064	-4.93068	2.64969e-05	0.000250361	1.77702
Hrasls	1.33162	2.05959	4.93003	2.65463e-05	0.000250663	2.26664
Zbtb41	0.725019	5.5799	4.92679	2.67932e-05	0.000252828	1.80517
Kcnj10	-0.944691	7.51435	-4.92347	2.70484e-05	0.000255068	1.7104
AW549877	0.708205	5.68896	4.92291	2.70918e-05	0.00025531	1.78241
Zfp383	0.896087	4.11404	4.9222	2.71467e-05	0.000255659	1.97142
Ddit4l	-1.07325	3.89681	-4.92163	2.71911e-05	0.00025591	1.85748
Nupr1	-1.57921	1.6147	-4.92099	2.72408e-05	0.000256073	2.24521
Celsr1	1.43581	4.88029	4.92095	2.72441e-05	0.000256073	1.83319
Slc4a3	-0.76882	6.15519	-4.92023	2.73001e-05	0.000256432	1.76986
Csgalnact1	1.13637	4.41848	4.91864	2.74242e-05	0.000257367	1.9436
Cmtm3	0.767246	5.4649	4.9185	2.74355e-05	0.000257367	1.77334
Slc7a8	0.938724	5.74024	4.91609	2.76248e-05	0.000258973	1.78689
Ccl4	-1.35348	-0.331397	-4.91551	2.76706e-05	0.000259234	2.36437
Nudcd2	1.15588	3.50976	4.91434	2.77638e-05	0.000259937	2.0073
Mad2l1	-0.790581	4.65344	-4.90658	2.83856e-05	0.000265586	1.84417
Rnf182	0.766163	4.07561	4.90341	2.86439e-05	0.000267574	1.90508
Klf15	0.940508	3.48497	4.90336	2.86483e-05	0.000267574	1.91486
Zc3hav1	-1.53657	1.56019	-4.90329	2.8654e-05	0.000267574	2.19192
Ptgr2	0.87984	4.33294	4.90263	2.8708e-05	0.000267904	1.85999
Ifi35	-1.78331	0.849607	-4.89818	2.90755e-05	0.000271157	2.24807
6430573F11Rik	1.50583	1.68707	4.89767	2.91178e-05	0.000271376	2.24239
Meis2	0.780725	8.08882	4.89713	2.91624e-05	0.000271615	1.62428
Efhd2	-0.689413	6.60296	-4.89366	2.94527e-05	0.000274141	1.64027
Edem1	-0.855607	4.17433	-4.89166	2.96215e-05	0.000275357	1.91165
Clstn1	0.636691	9.9338	4.89166	2.96217e-05	0.000275357	1.59393
Ermp1	0.752312	5.43376	4.88979	2.97806e-05	0.000276655	1.70698
Myo3b	-1.5669	0.702911	-4.88792	2.99402e-05	0.000277958	2.20546
Mroh5	1.78353	0.718443	4.88599	3.01054e-05	0.000279311	2.22633
Ncs1	-0.742787	7.4184	-4.88544	3.0153e-05	0.000279573	1.61219
Matk	-0.999375	5.26748	-4.88491	3.0198e-05	0.000279809	1.78201
Ifit1	-1.67795	0.692729	-4.88311	3.0354e-05	0.000281073	2.17506
Lipg	-1.01073	3.95146	-4.88125	3.05159e-05	0.00028239	1.79476
Arpc1b	-1.38497	3.18018	-4.87779	3.08186e-05	0.000285008	1.91804
Cenpi	-1.09145	1.68973	-4.87736	3.08567e-05	0.000285176	2.14079
Kif6	-1.32552	2.0399	-4.87609	3.09691e-05	0.000286031	2.07391
Myt1	0.593579	5.95851	4.87502	3.10631e-05	0.000286715	1.63377
Hat1	-0.721112	4.88854	-4.87443	3.11159e-05	0.000287018	1.70776
Ccdc94	0.930966	3.55216	4.87291	3.12512e-05	0.000288081	1.85534
Timm17b	0.69775	5.52401	4.87193	3.13387e-05	0.000288702	1.65076
Kif20b	-1.01139	3.29439	-4.87048	3.14686e-05	0.00028958	1.94782
Sdhb	0.648886	7.69522	4.87024	3.14902e-05	0.00028958	1.5583
Tcta	0.727256	4.91948	4.8702	3.14945e-05	0.00028958	1.70384
E030011O05Rik	-1.57546	0.0936524	-4.86502	3.19634e-05	0.000293703	2.1989
Cited2	0.781797	6.18654	4.86318	3.21321e-05	0.000295064	1.6002
Mycl	0.604021	6.66243	4.85826	3.25867e-05	0.000298957	1.56849
Cpd	-0.717388	6.40134	-4.85799	3.26114e-05	0.000298957	1.5866
Daw1	-1.59352	0.38031	-4.85791	3.26185e-05	0.000298957	2.16497
Cacng5	0.889104	4.1174	4.85664	3.27372e-05	0.000299855	1.79209
B3gat1	0.733948	8.68006	4.85457	3.29315e-05	0.000301442	1.50425
Brinp3	1.13036	4.44026	4.85347	3.30352e-05	0.000302199	1.78656
Ubxn7	0.784758	6.74782	4.85188	3.3185e-05	0.000303376	1.53906
Timm8b	0.910736	7.13326	4.84874	3.34839e-05	0.000305911	1.51152
Lama5	-1.63001	3.80675	-4.84852	3.35049e-05	0.000305911	1.76308
Ech1	0.696352	6.62815	4.84495	3.38488e-05	0.000308854	1.50435
Usp42	0.950423	4.45727	4.84417	3.39237e-05	0.000309341	1.71607
Efcab2	0.715732	5.07087	4.84252	3.40836e-05	0.000310602	1.60388
Gm16675	-1.283	0.222886	-4.83928	3.44008e-05	0.000313294	2.11132
Col26a1	-0.869171	4.53474	-4.83899	3.44295e-05	0.000313356	1.75216
Cpsf4	-0.828346	4.54025	-4.8385	3.44777e-05	0.000313596	1.70297
Tle2	-1.18478	1.82626	-4.83791	3.45358e-05	0.000313926	2.01128
Asf1b	-1.06395	2.76675	-4.83707	3.46182e-05	0.000314476	1.88118
Smad6	-1.38393	0.997666	-4.83576	3.47478e-05	0.000315454	2.02327
Clec4a2	-1.391	-0.512792	-4.83239	3.50838e-05	0.000318124	2.13235
Nanos1	-1.0092	3.60772	-4.83237	3.50862e-05	0.000318124	1.80491
Hspg2	-2.23447	3.89632	-4.83145	3.5178e-05	0.000318755	1.76561
Aurka	-1.0194	3.95444	-4.82735	3.55925e-05	0.000322307	1.74186
Abhd14b	-1.12043	2.74896	-4.82585	3.57447e-05	0.000323482	1.85262
Mafb	-0.933349	3.57545	-4.82471	3.58614e-05	0.000324333	1.7645
Nov	1.19848	7.5427	4.8242	3.59138e-05	0.000324603	1.46654
Glb1l2	-1.28385	2.15668	-4.82222	3.61174e-05	0.000326238	1.9123
Bace1	0.791792	5.59867	4.8214	3.62017e-05	0.000326663	1.52753
Tmem33	0.588369	7.09495	4.82132	3.621e-05	0.000326663	1.43387
Fbxo42	0.664154	6.10001	4.82103	3.62396e-05	0.000326725	1.49544
Nfatc2	0.928567	3.38673	4.81904	3.64459e-05	0.000328379	1.81214
Pdia4	-0.656086	7.20505	-4.81865	3.6487e-05	0.000328543	1.42084
Grb14	-1.13512	4.50688	-4.81472	3.68979e-05	0.000332035	1.69199
Kif18b	-1.02714	3.77318	-4.81403	3.6971e-05	0.000332484	1.72457
Lrrc51	-0.831398	3.5904	-4.81234	3.71501e-05	0.000333886	1.63827
Lrrc9	-1.42337	1.39737	-4.8069	3.77307e-05	0.000338892	1.92355
Arsa	0.654919	5.3812	4.80668	3.77546e-05	0.000338895	1.4905
Amotl2	0.846171	6.31109	4.80615	3.78113e-05	0.000339191	1.40973
Tgfbrap1	0.600699	5.63152	4.80286	3.81678e-05	0.000342176	1.45106
Ybx1	0.641967	9.95225	4.80227	3.82324e-05	0.000342541	1.33971
3830406C13Rik	0.559872	5.3361	4.80166	3.82997e-05	0.00034293	1.47049
Kat7	0.631323	6.95891	4.80003	3.84779e-05	0.000344311	1.38241
Slc27a1	0.762	6.96459	4.79977	3.85058e-05	0.000344346	1.36852
Casc3	0.721442	6.09371	4.7989	3.86018e-05	0.00034498	1.42428
Tifab	-1.34381	-0.441649	-4.79869	3.86247e-05	0.00034498	2.03896
Hmgcs2	1.77653	-0.269928	4.79839	3.86584e-05	0.000345066	2.04054
Neu1	0.681274	5.17039	4.79539	3.89902e-05	0.000347812	1.47693
Otx1	0.880631	4.53053	4.79504	3.90293e-05	0.000347858	1.54568
9330102E08Rik	0.857853	3.45748	4.79491	3.90438e-05	0.000347858	1.70016
Tpgs2	-0.779936	6.57417	-4.79264	3.92971e-05	0.00034986	1.38344
Nfasc	0.734176	7.34234	4.79246	3.93172e-05	0.00034986	1.35603
Psmf1	0.584739	6.75212	4.79224	3.93424e-05	0.000349867	1.36387
Mpz	1.29413	-0.342488	4.79076	3.95083e-05	0.000351125	2.03154
Rtn4	-0.604642	9.17867	-4.78675	3.9963e-05	0.000354947	1.30589
Ywhab	-0.740048	7.67298	-4.78642	4.00013e-05	0.000355046	1.32847
Grm2	1.00226	4.08418	4.78622	4.00236e-05	0.000355046	1.65672
Zfp141	0.912023	4.43358	4.78464	4.02041e-05	0.000356427	1.53667
Pkp4	-0.590018	7.59005	-4.78373	4.03089e-05	0.000357136	1.32151
Ncapg	-1.05782	2.75949	-4.78108	4.06151e-05	0.000359627	1.75748
Rhoj	-0.977848	3.22248	-4.78031	4.07042e-05	0.000359974	1.67291
Cd248	-1.11486	2.38462	-4.78031	4.07044e-05	0.000359974	1.79791
Bcl2l13	0.739227	6.09674	4.77776	4.10012e-05	0.000362375	1.35718
Dhrs4	0.800932	4.34523	4.77684	4.11083e-05	0.000363098	1.48133
Emc8	0.791888	6.70538	4.776	4.12076e-05	0.000363664	1.31493
Panx1	0.890718	7.49898	4.77587	4.1223e-05	0.000363664	1.30313
Wdr66	-1.24005	2.97327	-4.77509	4.13149e-05	0.000364251	1.72871
Lepr	-1.68053	1.32839	-4.77171	4.1714e-05	0.000367544	1.89907
Cryz	0.610879	5.78701	4.77134	4.1758e-05	0.000367706	1.35035
Ago1	0.68953	6.89598	4.76929	4.20034e-05	0.00036964	1.30605
Eif3d	0.90532	6.07731	4.76862	4.20835e-05	0.000370118	1.32431
Taf8	1.25548	2.73712	4.76832	4.21203e-05	0.000370216	1.686
Xpo4	0.9103	4.14707	4.76727	4.22454e-05	0.000371088	1.52616
Morn5	-1.56161	0.792998	-4.76635	4.23568e-05	0.000371704	1.89396
Crtap	-0.714546	4.9782	-4.76626	4.23673e-05	0.000371704	1.37231
Wdfy1	0.598159	6.20009	4.76376	4.26704e-05	0.000374135	1.30983
Tex9	-0.793538	4.27864	-4.76103	4.30039e-05	0.000376829	1.47828
Gabra4	-0.602573	5.89174	-4.75432	4.38351e-05	0.000383877	1.30067
Asxl3	0.795614	6.16546	4.75321	4.39733e-05	0.000384854	1.29604
Ppid	0.911416	6.42075	4.75078	4.42797e-05	0.000387299	1.26471
Nceh1	-0.661591	6.17549	-4.74709	4.47471e-05	0.000391116	1.26211
Tubb6	-0.958769	5.27174	-4.74691	4.47705e-05	0.000391116	1.30203
Pdp1	-0.631091	5.66521	-4.74598	4.48888e-05	0.000391911	1.26714
Mras	0.638015	7.52055	4.74486	4.50332e-05	0.000392933	1.21381
Zhx3	0.931347	6.21087	4.74073	4.55655e-05	0.000397336	1.25378
Tmem47	-0.907993	8.00748	-4.73754	4.59822e-05	0.000400726	1.17219
Ccpg1os	-0.882549	4.60574	-4.73729	4.60155e-05	0.000400773	1.31096
Papola	-0.564272	7.80978	-4.73417	4.64264e-05	0.000404106	1.1732
Gabrd	-1.19496	2.80975	-4.73395	4.64552e-05	0.000404113	1.63768
Ces1f	-1.16063	-0.323086	-4.7277	4.72892e-05	0.000411119	1.84447
Ctnnal1	-1.08324	4.45129	-4.72668	4.74271e-05	0.00041187	1.29892
Sema3e	1.14158	3.43812	4.72655	4.74445e-05	0.00041187	1.50934
Dpy19l4	0.937917	5.00487	4.72643	4.74616e-05	0.00041187	1.27445
Pcdh9	0.711373	5.91507	4.72486	4.76744e-05	0.000413466	1.22287
Mrto4	1.01746	5.97538	4.72369	4.78329e-05	0.00041459	1.21808
Pctp	-1.29969	0.761045	-4.71968	4.83829e-05	0.000419105	1.73574
Snx29	0.675267	4.75125	4.71938	4.84236e-05	0.000419204	1.31349
Phf21a	0.554092	6.83529	4.7187	4.85176e-05	0.000419765	1.15097
Sprtn	0.673414	4.31314	4.71664	4.88036e-05	0.000421985	1.32432
Ccdc61	-1.18052	1.97157	-4.7164	4.88368e-05	0.000422018	1.66202
Myo1f	-1.5762	0.464141	-4.71589	4.89071e-05	0.000422308	1.7694
Gsdmd	-1.73661	-0.0318835	-4.71574	4.89292e-05	0.000422308	1.79589
Rsad1	0.804926	4.12563	4.71507	4.9022e-05	0.000422855	1.36581
Rmi1	-0.799247	4.31021	-4.71302	4.93095e-05	0.000425079	1.34388
Fam32a	0.578733	8.14003	4.70957	4.97964e-05	0.000429004	1.09716
Lca5l	-1.53554	-0.0397647	-4.70937	4.98244e-05	0.000429004	1.77715
Ext1	-0.714609	5.24416	-4.70784	5.00428e-05	0.000430626	1.22212
Leprotl1	0.833866	6.62196	4.70697	5.0166e-05	0.000431346	1.13292
Tlr13	-1.64548	1.40398	-4.70683	5.01866e-05	0.000431346	1.67173
Dhx32	-0.596239	5.70304	-4.70533	5.04015e-05	0.000432755	1.16291
Gpr37l1	0.86993	3.43045	4.70506	5.04406e-05	0.000432755	1.43547
Cntn4	1.31876	2.0437	4.70505	5.04409e-05	0.000432755	1.60447
Plbd2	0.711894	5.99537	4.70143	5.09642e-05	0.000436749	1.13333
Sdc1	-1.00029	4.11129	-4.70141	5.09672e-05	0.000436749	1.37006
Slain1	-0.657905	7.17431	-4.70079	5.10569e-05	0.000437186	1.10527
Rnh1	-0.62638	5.17842	-4.70064	5.10791e-05	0.000437186	1.18612
Ifrd1	-0.705179	6.37625	-4.70007	5.11613e-05	0.000437628	1.17443
2410015M20Rik	0.603101	6.08093	4.69847	5.13959e-05	0.000439374	1.1357
Sh3pxd2a	-0.853626	4.01582	-4.69647	5.16897e-05	0.000441465	1.373
Smarca1	0.749119	4.55038	4.69638	5.17021e-05	0.000441465	1.29086
Lats1	0.746529	7.33715	4.69578	5.17901e-05	0.000441955	1.08108
Clcn3	0.599176	8.06475	4.6949	5.1921e-05	0.000442808	1.05994
Fam35a	0.909536	3.20504	4.69369	5.21004e-05	0.000443933	1.42762
Sh3bgrl	-0.622575	7.78018	-4.69359	5.21147e-05	0.000443933	1.05838
Ranbp3	0.773174	4.2962	4.6913	5.24554e-05	0.00044657	1.30609
Shisa7	0.778661	6.45732	4.69102	5.24975e-05	0.000446664	1.12221
Metap2	0.66041	7.53343	4.68927	5.2759e-05	0.000448623	1.05176
Tor1aip1	0.914167	6.36634	4.68811	5.29336e-05	0.000449795	1.0764
Vnn1	-1.40975	-0.139556	-4.68793	5.29618e-05	0.000449795	1.72917
Dhx58	-1.37126	0.764637	-4.68773	5.29907e-05	0.000449795	1.69988
Abcc3	-1.70503	1.08584	-4.68734	5.30499e-05	0.000450031	1.64138
3632451O06Rik	0.905719	5.02176	4.68682	5.31283e-05	0.000450431	1.23876
Spata2	0.569574	7.32055	4.68545	5.33361e-05	0.000451925	1.04993
Gabrg3	-0.969198	3.65523	-4.68508	5.33922e-05	0.000452134	1.37709
Ccdc129	1.83143	1.02981	4.684	5.35572e-05	0.000453264	1.69147
Spata17	-1.214	1.31007	-4.68353	5.36284e-05	0.000453599	1.57566
Fam195b	0.626009	7.20308	4.68198	5.38665e-05	0.000455345	1.04176
Hic1	-1.87207	0.140302	-4.68061	5.40766e-05	0.000456852	1.69219
Tmtc4	-0.972538	4.62934	-4.6778	5.45102e-05	0.000460244	1.23183
Stard5	-0.691891	4.55872	-4.67744	5.45668e-05	0.000460451	1.15692
Abcf3	0.739346	5.69292	4.67674	5.46758e-05	0.000461101	1.09314
Cyba	-1.52715	2.5634	-4.67637	5.47323e-05	0.000461306	1.42124
Pygb	0.869429	7.30074	4.67552	5.48663e-05	0.000462016	1.0137
Crot	0.654524	5.13583	4.67542	5.48809e-05	0.000462016	1.11999
Arsg	1.147	2.95182	4.6747	5.49935e-05	0.000462554	1.38553
Nrxn2	0.648881	9.02648	4.6746	5.50093e-05	0.000462554	0.993017
Lpl	-0.848092	6.06521	-4.67406	5.50942e-05	0.000462998	1.06892
Armc2	-1.25279	1.88777	-4.6732	5.52297e-05	0.000463865	1.52705
Srgn	-1.39448	0.867206	-4.67172	5.54627e-05	0.00046555	1.63726
Cecr2	1.25654	2.22199	4.66901	5.58923e-05	0.000468882	1.49411
Tjap1	-0.753265	4.47987	-4.6678	5.60851e-05	0.000470224	1.18828
Ccne2	-0.985601	2.49591	-4.66422	5.66589e-05	0.000474511	1.44333
Ubr7	0.686654	6.01924	4.6642	5.66625e-05	0.000474511	1.04005
Atg14	0.741873	5.29743	4.66371	5.67411e-05	0.000474569	1.10793
Gadd45a	0.972035	4.96669	4.66356	5.67653e-05	0.000474569	1.14916
Mtx2	-0.704045	5.76048	-4.66354	5.67686e-05	0.000474569	1.055
Ebf1	-1.61013	1.14088	-4.66196	5.70236e-05	0.000476424	1.57456
Sacm1l	-0.575046	6.69061	-4.66014	5.73197e-05	0.000478619	1.00275
Cct6a	1.00136	7.47957	4.6599	5.73601e-05	0.000478679	0.978672
Lpar4	-0.94151	3.30225	-4.65922	5.74709e-05	0.000479325	1.29786
Bmp4	1.21823	2.40166	4.65842	5.76019e-05	0.000480139	1.45521
Espn	1.40402	1.1694	4.65647	5.79226e-05	0.000482531	1.56775
Zfp46	0.596861	6.90901	4.65488	5.81851e-05	0.000484437	0.994601
Wipi1	0.796073	5.84287	4.64979	5.90326e-05	0.00049112	0.986402
Cldn11	1.45307	3.41513	4.64965	5.90561e-05	0.00049112	1.30233
Wnt5b	-1.11187	2.43959	-4.64858	5.92371e-05	0.00049234	1.38396
Mitd1	-0.909208	2.62971	-4.64792	5.93487e-05	0.000492982	1.37297
Hprt	-0.937379	5.43932	-4.64746	5.94264e-05	0.000493343	1.08085
Strn	0.59511	6.75124	4.6472	5.94702e-05	0.000493421	0.967602
Crip2	-0.857484	6.20808	-4.64678	5.95401e-05	0.000493716	1.00079
Cd34	-1.50359	1.13814	-4.64556	5.97474e-05	0.000495148	1.54491
Fis1	0.888662	5.0538	4.64425	5.99712e-05	0.000496717	1.05587
Crtc1	0.66391	6.34862	4.64378	6.00506e-05	0.000497088	0.968652
Hirip3	-0.816366	4.89201	-4.64087	6.05504e-05	0.000500936	1.06353
Scpep1	-0.786418	7.07245	-4.64031	6.06471e-05	0.000501447	0.923223
Ccs	0.866351	5.60266	4.63987	6.0722e-05	0.000501778	0.990983
Ik	0.651257	6.16333	4.63778	6.10844e-05	0.000504482	0.965379
Kirrel3os	1.13455	2.21132	4.63518	6.1538e-05	0.000507936	1.43846
Gpsm3	-1.4092	1.75238	-4.63461	6.16374e-05	0.000508464	1.42051
Tspo	-1.43612	1.89961	-4.63429	6.16946e-05	0.000508644	1.38366
Nr4a1	0.927364	6.37817	4.63283	6.19507e-05	0.000510463	1.04961
Dync1i1	0.874801	6.53897	4.63168	6.21533e-05	0.000511729	0.941249
Cdc25b	-0.896985	3.67783	-4.63155	6.21756e-05	0.000511729	1.19225
Fam118a	-0.762849	4.7572	-4.63017	6.24216e-05	0.000513459	1.06614
Lpin1	0.815032	6.0946	4.62946	6.25478e-05	0.000514202	0.953045
Myl12a	-0.743876	5.97938	-4.62721	6.29492e-05	0.000517206	0.927896
Samd5	-0.870842	3.71241	-4.62685	6.30133e-05	0.000517437	1.1683
Bambi-ps1	1.4663	0.790332	4.62515	6.33187e-05	0.000519647	1.54183
Acod1	-1.17465	-0.515475	-4.62478	6.33851e-05	0.000519895	1.56651
Islr2	0.942813	3.74724	4.62399	6.35279e-05	0.000520769	1.24909
Scd2	0.782909	11.2413	4.62344	6.3627e-05	0.000521284	0.823843
Utp18	0.681563	5.07631	4.62002	6.42479e-05	0.000526071	1.01288
Prdm2	0.846769	5.61101	4.61975	6.42968e-05	0.000526172	0.957571
Cacna1h	-0.931208	4.73542	-4.61942	6.43573e-05	0.000526366	1.09372
1700003E16Rik	-0.860621	5.31851	-4.61826	6.45706e-05	0.000527631	0.974457
Mok	-0.741678	4.76522	-4.61815	6.45901e-05	0.000527631	1.02184
Gm13387	1.61259	0.145689	4.61793	6.46316e-05	0.000527631	1.53204
Apobec1	-1.19346	2.04759	-4.61778	6.46589e-05	0.000527631	1.34071
Mettl7a1	-1.01939	3.4279	-4.61654	6.48861e-05	0.000529185	1.1368
Apcdd1	0.766934	5.29632	4.61463	6.52404e-05	0.000531772	0.982534
Snap25	-0.81323	8.85293	-4.61434	6.52944e-05	0.00053191	0.822218
Tifa	1.09979	3.78158	4.61217	6.56978e-05	0.00053486	1.10334
Fbxl7	-1.49598	3.55825	-4.61199	6.57309e-05	0.00053486	1.14389
Cirh1a	0.648755	5.20031	4.61072	6.59696e-05	0.000536498	0.960795
Asic1	0.849131	6.33364	4.60944	6.62103e-05	0.00053815	0.885669
Brap	0.474307	5.90789	4.60443	6.71593e-05	0.000545556	0.889024
Srrm2	0.940541	8.6344	4.60417	6.7209e-05	0.000545651	0.794805
Cntn5	-1.10492	3.58987	-4.60358	6.73208e-05	0.000546002	1.18644
Irs4	1.43188	0.235493	4.60354	6.73283e-05	0.000546002	1.47762
Saxo2	-1.18387	1.13132	-4.60283	6.74644e-05	0.000546797	1.40939
Vwa3b	-1.26107	1.40691	-4.60148	6.77244e-05	0.000548555	1.39872
Slco1c1	-0.578256	4.70217	-4.60119	6.77804e-05	0.000548555	0.93773
Tmem221	-1.11624	-0.457922	-4.60111	6.7796e-05	0.000548555	1.49817
Ldlrap1	-1.47511	1.64556	-4.59968	6.80726e-05	0.000550483	1.31526
Maged2	-0.692009	5.91492	-4.59838	6.83243e-05	0.000552208	0.875615
Cd200r4	-1.39465	0.013406	-4.59803	6.83911e-05	0.000552437	1.47904
Fam92b	-1.64759	0.424389	-4.58963	7.00441e-05	0.00056528	1.42705
Stil	-1.36861	2.83673	-4.58955	7.00597e-05	0.00056528	1.24309
Wbp2	0.71449	8.60955	4.58835	7.02977e-05	0.000566881	0.749693
Chst14	-1.1628	2.1237	-4.58547	7.08761e-05	0.000571225	1.22668
Pld1	0.860087	4.34936	4.58526	7.09179e-05	0.000571241	0.975862
AI606473	1.68679	0.161012	4.58292	7.13907e-05	0.000574727	1.43493
Pla1a	-1.38523	-0.323218	-4.5827	7.14367e-05	0.000574775	1.4499
Galnt18	-0.886489	4.4529	-4.58134	7.1712e-05	0.000576667	0.977792
Gpr61	-1.09801	2.67233	-4.58037	7.19105e-05	0.00057794	1.2471
Tnni3	-1.36596	0.189475	-4.57955	7.20785e-05	0.000578966	1.40859
Slc1a5	1.26531	2.13091	4.57801	7.23933e-05	0.000581169	1.32695
Cyp1b1	-1.34922	3.36603	-4.57717	7.25658e-05	0.000582229	1.08541
1600014C10Rik	1.11205	3.73837	4.57524	7.29656e-05	0.00058511	1.03977
Acox2	-1.31338	0.777757	-4.57113	7.38227e-05	0.000591652	1.34028
Coro7	0.639674	5.86897	4.56835	7.44066e-05	0.000596	0.795056
Ttc5	0.541652	5.51082	4.56666	7.47644e-05	0.000598216	0.784904
Tubb4a	0.632765	9.32669	4.56665	7.47665e-05	0.000598216	0.687357
Pcnt	0.858389	4.58251	4.56138	7.58933e-05	0.000606893	0.916123
Mamdc2	-1.27804	2.48344	-4.56086	7.6006e-05	0.000607456	1.14099
Pde1c	0.775263	3.19402	4.56063	7.60561e-05	0.000607518	1.06573
Plk1	-0.858007	3.63288	-4.55794	7.66387e-05	0.000611739	1.0184
Tmco4	1.27679	1.96409	4.5578	7.66697e-05	0.000611739	1.19097
Ercc2	0.791179	4.78444	4.55453	7.73836e-05	0.000617092	0.842602
Garnl3	0.682477	6.21332	4.55327	7.76606e-05	0.000618864	0.756415
Zfyve19	0.778699	3.92486	4.55313	7.76919e-05	0.000618864	0.93082
Gpx8	-1.05113	4.81221	-4.55281	7.77616e-05	0.000619075	0.784978
Slc24a5	-1.2487	0.0733547	-4.55059	7.82542e-05	0.000622652	1.34387
Pop7	0.738583	4.89598	4.54817	7.87919e-05	0.000626583	0.81821
Zfp655	0.789331	5.254	4.54664	7.91356e-05	0.000628968	0.785943
Pdia3	-0.661434	8.61809	-4.5446	7.95956e-05	0.000632274	0.62965
Adm	-1.40832	1.59344	-4.54433	7.96562e-05	0.000632406	1.27743
Parp1	0.54626	7.27094	4.54403	7.97237e-05	0.000632592	0.654036
Thrsp	0.862149	3.7362	4.54187	8.02144e-05	0.000636134	0.897792
Map2k2	-0.602151	6.85893	-4.5407	8.04808e-05	0.000637827	0.662593
Stc1	-0.668729	4.34426	-4.54054	8.05167e-05	0.000637827	0.92137
Slc29a2	0.593421	4.71194	4.53786	8.11313e-05	0.000642342	0.83703
Mapk9	-0.759542	5.82848	-4.5354	8.17004e-05	0.000646491	0.690126
Slc26a11	0.993767	2.56086	4.53489	8.18177e-05	0.000647063	1.07763
Tmem51	0.964331	2.72343	4.53188	8.252e-05	0.000652257	1.03808
AW551984	0.82903	4.30131	4.53168	8.25666e-05	0.000652267	0.817505
Klhl13	-0.543683	7.01	-4.52914	8.3164e-05	0.000656625	0.616735
Abi1	0.45648	7.5927	4.52822	8.33812e-05	0.000657979	0.599045
Prrc2b	0.737207	9.12717	4.52742	8.35704e-05	0.000658955	0.5763
Pdcd11	0.812982	5.45109	4.52715	8.36335e-05	0.000658955	0.68765
St3gal1	0.796872	5.47719	4.52684	8.3707e-05	0.000658955	0.731624
Ankrd63	-1.3806	0.683096	-4.52679	8.37197e-05	0.000658955	1.22465
Atxn2	-0.618649	6.89373	-4.52649	8.37902e-05	0.000658955	0.626307
Bub1	-1.14599	1.81269	-4.52649	8.37902e-05	0.000658955	1.19009
Ticam1	1.13235	2.00063	4.52634	8.38261e-05	0.000658955	1.07986
Iqck	-1.28415	2.18411	-4.5226	8.47202e-05	0.000665619	1.07449
Cgn	0.992499	3.14478	4.52147	8.49913e-05	0.000667384	1.00976
Phf2	0.724927	5.80031	4.52045	8.52386e-05	0.00066896	0.65909
Hs3st2	1.23073	4.74706	4.5143	8.67374e-05	0.000680351	0.826869
Kit	-0.72711	4.64367	-4.5141	8.67881e-05	0.000680377	0.773634
Dnase1	1.3763	2.34555	4.51148	8.74338e-05	0.000684925	1.08692
Morn1	-0.961542	3.12097	-4.51136	8.74637e-05	0.000684925	0.927645
Dennd1c	-1.46162	-0.414305	-4.51057	8.76594e-05	0.000686084	1.24851
Zfp282	0.627323	6.71673	4.51031	8.77243e-05	0.000686218	0.578925
Spag5	-0.939369	2.90828	-4.50924	8.79897e-05	0.000687919	1.01393
Fam64a	-1.08216	3.46315	-4.50603	8.87949e-05	0.000693659	0.889809
Ubn1	0.554757	5.40197	4.50593	8.88204e-05	0.000693659	0.652767
Pfdn6	0.60954	5.91759	4.50525	8.89915e-05	0.000694617	0.602195
Ddx50	-0.907652	4.32717	-4.50386	8.93417e-05	0.000696972	0.779372
Gm2061	1.22	1.78166	4.50325	8.94983e-05	0.000697815	1.12016
Mxd3	-0.970821	2.57564	-4.50013	9.02914e-05	0.000703616	1.00326
Aspn	-1.326	-0.319361	-4.49974	9.03912e-05	0.000704012	1.22521
Pigs	0.812122	7.01456	4.49866	9.06689e-05	0.000705792	0.53274
Lima1	1.00793	5.20961	4.49839	9.07377e-05	0.000705946	0.620156
Sdk1	0.870403	4.07354	4.49787	9.08719e-05	0.000706605	0.827767
Fank1	-1.14025	1.72538	-4.49768	9.09209e-05	0.000706605	1.10002
Adgrb2	0.506808	7.60937	4.49696	9.11082e-05	0.000707678	0.522127
1810010H24Rik	0.847553	2.92919	4.49394	9.18904e-05	0.000713367	0.869673
Usp40	0.899541	4.56101	4.4928	9.21879e-05	0.000715186	0.660707
Vegfa	0.845807	5.95969	4.49266	9.22243e-05	0.000715186	0.601355
Serpina3n	1.15589	2.80425	4.49192	9.24174e-05	0.000716297	0.9651
Mmp12	-1.44082	0.747246	-4.49042	9.2812e-05	0.000718967	1.14336
Dcp1a	0.692197	3.93144	4.48982	9.29691e-05	0.000719796	0.763907
Gatc	-0.621775	5.46422	-4.48822	9.33905e-05	0.000722669	0.563998
Mki67	-0.927915	4.50104	-4.48689	9.37445e-05	0.000725018	0.733701
Rbm43	-0.68466	3.67612	-4.48481	9.4298e-05	0.000728906	0.749529
Phlpp1	0.694095	7.66067	4.48458	9.43598e-05	0.000728992	0.476076
Ift43	-0.783946	5.11535	-4.48275	9.48498e-05	0.000732383	0.585029
Lrrc45	-0.881934	4.51337	-4.4818	9.5106e-05	0.000733967	0.685851
Lsm2	-0.691393	5.44847	-4.48015	9.55517e-05	0.000737011	0.576343
Cars2	-0.605095	4.29899	-4.47878	9.59228e-05	0.000739476	0.72407
Pea15a	-0.58931	10.886	-4.47822	9.60752e-05	0.000740253	0.414807
Fam180a	-1.52818	0.513846	-4.47774	9.62047e-05	0.000740854	1.15278
Pidd1	-1.16228	1.7036	-4.47582	9.67295e-05	0.000744496	0.9934
LOC102635165	-1.34536	-0.291271	-4.47456	9.70747e-05	0.000746752	1.15393
Cdca2	-1.0847	3.04114	-4.47313	9.74699e-05	0.000749391	0.844565
Col4a6	-1.55289	2.0817	-4.47097	9.80682e-05	0.000753588	0.954806
Sytl5	1.55236	1.41538	4.46993	9.83555e-05	0.000755391	1.04713
Gm38414	-1.31287	-0.0415574	-4.46951	9.84741e-05	0.000755898	1.1151
Zkscan2	0.956403	4.6199	4.46905	9.86013e-05	0.000756173	0.647815
S1pr3	-1.46335	4.15376	-4.469	9.86152e-05	0.000756173	0.585834
Vcam1	-0.710812	5.78031	-4.46662	9.92818e-05	0.000760878	0.490021
Cotl1	-0.610522	8.39751	-4.46595	9.94718e-05	0.000761928	0.411393
Tspan7	0.550149	10.4342	4.46547	9.96063e-05	0.000762551	0.385265
Gusb	-1.05258	3.47078	-4.46225	0.000100518	0.000768755	0.720112
Fos	1.30423	6.54892	4.46223	0.000100524	0.000768755	0.563893
Dhx38	0.571144	5.74058	4.45715	0.00010198	0.000779476	0.474515
Pfdn5	0.997462	7.98474	4.45609	0.000102286	0.0007814	0.392415
Parva	-0.831179	6.88308	-4.45238	0.000103365	0.000789224	0.396887
Idh3g	-0.552088	7.85247	-4.45194	0.000103495	0.000789797	0.377736
Matn3	-1.24563	0.624637	-4.45137	0.000103661	0.000790646	1.04291
Ttc26	-0.953306	2.48114	-4.4511	0.000103741	0.000790831	0.873522
Tmem170b	0.74679	6.33692	4.45034	0.000103965	0.000792118	0.441565
Camk2b	-0.705124	9.27035	-4.44969	0.000104155	0.00079315	0.360459
Cox8b	1.67162	0.242622	4.44758	0.00010478	0.000797484	1.03555
Sf3b5	0.760014	5.35668	4.44728	0.000104867	0.00079772	0.504418
Edc4	0.587413	6.90075	4.44659	0.000105072	0.000798861	0.392422
Eef2k	0.658803	5.86759	4.44484	0.000105594	0.000802399	0.428232
Gulp1	-0.910681	3.36186	-4.44459	0.00010567	0.000802553	0.650689
Coa6	0.957707	4.7373	4.44263	0.000106258	0.000806287	0.507993
E2f1	-0.74697	4.5225	-4.44257	0.000106274	0.000806287	0.613402
Kntc1	-0.989055	2.03835	-4.43867	0.000107453	0.000814802	0.910869
Aamdc	0.640607	5.08931	4.43838	0.00010754	0.000815036	0.466319
Gm34006	-1.36441	0.695491	-4.43692	0.000107986	0.000817979	0.976367
Atp5c1	-0.486192	8.26081	-4.43543	0.000108443	0.000821013	0.328113
Dzip1l	-0.774907	4.16486	-4.43427	0.000108799	0.000823272	0.564649
Rec8	-1.42255	0.748815	-4.43228	0.000109412	0.000827476	0.983089
Osbpl1a	0.644668	7.00512	4.43107	0.000109788	0.000829599	0.368746
Naa30	0.531771	5.64664	4.431	0.000109808	0.000829599	0.418035
Khnyn	0.732467	4.5868	4.43069	0.000109907	0.000829908	0.498811
Ehd2	-1.0475	3.6773	-4.42847	0.000110598	0.000834556	0.567493
Lrrc46	-1.15646	2.74555	-4.42834	0.000110639	0.000834556	0.717003
Mafg	0.997813	4.39571	4.42706	0.000111041	0.000836968	0.56064
Fanca	-1.03606	2.47461	-4.42694	0.000111078	0.000836968	0.823425
Plekhg2	-1.24948	3.46362	-4.42676	0.000111133	0.000836968	0.642487
Cyp26b1	-0.957752	4.66361	-4.42612	0.000111335	0.000838048	0.539479
Trip13	-0.813033	3.06688	-4.422	0.000112641	0.000847063	0.711824
Clp1	0.80087	3.90415	4.42197	0.000112651	0.000847063	0.625564
Cenpe	-0.868634	3.88375	-4.4215	0.000112798	0.000847604	0.611519
Rd3	-1.58999	0.855667	-4.42137	0.000112841	0.000847604	0.912029
4933439C10Rik	-1.01538	3.56695	-4.41983	0.000113333	0.000850857	0.625134
Tfcp2l1	-1.24811	3.21347	-4.41867	0.000113707	0.000853215	0.601174
Cnr1	-0.862528	5.25953	-4.41814	0.000113877	0.000853794	0.440094
Ccdc68	-1.26661	-0.341978	-4.41806	0.000113903	0.000853794	1.00079
Wscd1	0.50262	6.89718	4.41723	0.000114168	0.000855339	0.306479
Traf3ip2	-1.44445	0.179409	-4.41646	0.000114418	0.000856253	0.974934
Memo1	-0.65486	6.57645	-4.41633	0.00011446	0.000856253	0.327932
Nfkb2	-0.962841	3.62137	-4.41629	0.000114474	0.000856253	0.622677
Lcorl	0.635282	6.43571	4.41612	0.000114529	0.000856253	0.339131
Zfpm1	0.879164	3.64022	4.4158	0.00011463	0.000856564	0.629729
Asb2	-1.27545	-0.383705	-4.41541	0.000114757	0.000857066	0.988836
Lamc3	-1.60505	0.903208	-4.41405	0.000115201	0.000859935	0.973632
Ddx58	-1.39599	1.75553	-4.41219	0.000115808	0.000864019	0.790164
Mapk1	-0.571439	8.9641	-4.41004	0.000116512	0.000868678	0.250356
Mdm1	-0.880776	3.63296	-4.40992	0.000116554	0.000868678	0.61446
Drd3	1.60059	0.0336336	4.40945	0.000116706	0.000869362	0.97982
Tmem41a	-0.793831	4.68505	-4.40795	0.000117202	0.000872607	0.469437
Wif1	-1.29598	1.24171	-4.40686	0.000117565	0.000874852	0.822254
Clic1	-0.924004	5.5371	-4.4037	0.000118619	0.000881854	0.324626
Brf1	0.663632	5.57289	4.40367	0.000118628	0.000881854	0.349528
Fkbp7	-1.1174	1.76219	-4.40323	0.000118777	0.000882499	0.802617
Naa25	0.546057	6.50251	4.40285	0.000118905	0.000882996	0.294101
Zfp408	0.637068	4.58372	4.40155	0.000119342	0.000885785	0.453453
Rfx3	0.598116	7.24988	4.40113	0.000119485	0.000886383	0.257907
Sde2	0.492466	6.6699	4.40029	0.000119766	0.000888013	0.267421
Hspa12a	1.05439	5.91993	4.40006	0.000119846	0.000888145	0.372489
Sidt1	-1.15583	3.19783	-4.39716	0.00012083	0.000894978	0.719082
Fam161b	-0.621728	4.61099	-4.39653	0.000121045	0.000896111	0.380969
2900026A02Rik	0.684988	5.80707	4.39279	0.00012233	0.000905153	0.31533
Nkiras2	0.617523	5.53742	4.39208	0.000122575	0.0009065	0.306432
Ppp1r14c	0.649122	6.30787	4.39174	0.000122693	0.000906905	0.271633
Ncam2	0.755083	6.87827	4.38919	0.000123582	0.000913006	0.248223
LOC108169077	1.29262	1.4598	4.3864	0.00012456	0.000919755	0.778316
Cdhr3	-1.51706	-0.222819	-4.3838	0.000125476	0.000925363	0.901583
Mmp15	-0.714003	7.38353	-4.38375	0.000125493	0.000925363	0.218791
Crygs	-1.22091	-0.0088167	-4.3837	0.000125512	0.000925363	0.884066
4932443I19Rik	-1.2009	2.27429	-4.38332	0.000125645	0.000925865	0.63271
Gbas	0.457876	6.86931	4.37929	0.000127083	0.00093598	0.201699
Dusp1	-0.786807	5.51499	-4.37852	0.00012736	0.000937544	0.344192
Celf6	-0.905385	4.53174	-4.37672	0.00012801	0.000941846	0.399253
Klhl11	0.891788	6.49768	4.37584	0.000128327	0.000943697	0.213683
Poglut1	0.811796	6.28175	4.37373	0.000129093	0.00094884	0.198356
Arih2	0.555033	5.5001	4.37276	0.00012945	0.000950976	0.259186
Slc11a1	-1.57387	1.8775	-4.37254	0.000129529	0.00095107	0.65752
Pcsk5	1.21967	3.85218	4.37153	0.000129897	0.000953285	0.49202
Dpy30	0.742179	6.31205	4.37129	0.000129987	0.000953458	0.204863
Morn3	-1.3532	0.710499	-4.37042	0.000130305	0.000955306	0.809893
Ppfibp2	1.31345	2.37216	4.36887	0.000130877	0.00095901	0.610677
Cers1	1.59714	4.90452	4.3665	0.000131755	0.000964489	0.351442
Zfp560	0.856988	2.79835	4.36649	0.000131759	0.000964489	0.618419
Cspp1	0.848664	4.12482	4.36367	0.000132812	0.0009717	0.369452
Ttyh1	1.17277	8.50128	4.35915	0.000134517	0.000983674	0.110577
Ccdc30	-0.926824	2.89726	-4.35881	0.000134644	0.000984097	0.577712
Pcp4l1	-0.807799	4.35982	-4.35822	0.000134871	0.000985258	0.303165
Cspg4	0.975261	4.06371	4.35639	0.000135567	0.000989843	0.444039
Rbm8a	0.580995	7.75246	4.35497	0.000136113	0.00099332	0.113278
Numa1	0.793	7.00589	4.35202	0.000137248	0.0010011	0.124153
Rmst	1.47601	-0.00714951	4.34857	0.000138591	0.00100951	0.810669
Esco2	-1.14861	2.87782	-4.34852	0.000138608	0.00100951	0.565245
Dars	0.881202	7.94776	4.34851	0.000138612	0.00100951	0.0878744
Ndst3	-0.891493	3.23469	-4.34776	0.000138907	0.00101107	0.471446
Arap3	-1.35666	0.0223409	-4.34761	0.000138967	0.00101107	0.790174
Wdr61	0.641329	6.01728	4.34724	0.000139113	0.00101161	0.141401
Ndp	0.849339	3.49787	4.34582	0.00013967	0.00101515	0.442862
Sapcd2	0.914958	3.34458	4.34483	0.000140059	0.00101746	0.500722
Vps18	0.663088	5.42693	4.34404	0.000140372	0.00101922	0.197156
Tbl2	0.679656	4.97623	4.34113	0.000141527	0.00102709	0.245098
Slc2a4	-0.883306	2.79874	-4.33708	0.000143154	0.00103837	0.477666
Snrnp200	0.527718	6.77765	4.33426	0.000144294	0.00104611	0.087345
Chn2	0.666659	6.56365	4.33338	0.000144656	0.00104821	0.0926527
Rras	-0.859834	3.48447	-4.33302	0.0001448	0.00104873	0.31576
Gfap	1.63635	3.8567	4.33256	0.000144989	0.00104956	0.407703
Nfkbia	-0.737217	5.67504	-4.33122	0.000145539	0.00105249	0.141157
Gm16486	1.49077	0.0361835	4.33121	0.00014554	0.00105249	0.766485
Zbtb18	-0.688051	7.51269	-4.32415	0.000148464	0.00107309	0.049086
Parp9	-1.08002	2.61171	-4.32328	0.00014883	0.0010752	0.455885
Kif24	-0.996696	1.7189	-4.32269	0.000149076	0.00107644	0.615535
Msh6	-0.676534	4.02069	-4.32232	0.000149235	0.00107704	0.295728
Pfn1	-0.628552	9.34061	-4.32154	0.000149561	0.00107886	-0.000786136
Cadm3	-0.708895	9.02649	-4.32097	0.0001498	0.00107964	0.0061421
Rnf10	-0.490605	9.04846	-4.32085	0.000149851	0.00107964	0.00279153
Cdh11	-0.695697	5.92872	-4.32075	0.000149896	0.00107964	0.0936755
Arhgef15	1.34774	1.09855	4.31924	0.000150534	0.00108369	0.656765
Tmem230	0.666814	5.64519	4.31599	0.000151918	0.00109305	0.0767515
Ddias	-0.797719	2.59392	-4.31583	0.000151986	0.00109305	0.485368
Epb41	0.681014	5.69469	4.31425	0.000152665	0.00109738	0.105893
[truncated: 12,364 more rows]

## Sheet: SLCs_B27 Starved
List of SLCs change in KO primary cortical neuronal culture after overnight B27 starvation.
	logFC	AveExpr	t	P.Value	adj.P.Val	B
Slc38a10	-5.59749	4.36971	-16.3212	1e-16	9.57e-14	28.0786
Slc6a11	2.0333	8.03533	13.8216	9.26e-15	3.22e-12	23.6346
Slc43a2	1.61438	6.74736	13.4405	1.95e-14	6.08e-12	22.8958
Slc1a2	2.31646	8.98167	11.7367	6.56e-13	1.06e-10	19.3356
Slc7a10	2.96909	2.36874	10.2848	1.72e-11	1.66e-09	16.2547
Slco1a4	-3.19575	0.37105	-9.91546	4.13e-11	3.35e-09	15.384
Slc6a13	-3.1791	1.48383	-9.69302	7.05e-11	5.3e-09	14.8699
Slco1a5	-3.27635	0.944202	-9.56858	9.54e-11	6.84e-09	14.5852
Slc7a11	2.46986	5.06006	8.85676	5.59e-10	2.92e-08	12.6936
Slc20a2	1.55054	6.52716	8.39725	1.81e-09	7.72e-08	11.3716
Slc39a4	-2.1555	0.862905	-7.26511	3.68e-08	9.96e-07	8.75583
Slc16a4	-2.13227	1.92084	-7.06661	6.33e-08	1.58e-06	8.16436
Slc9a8	1.1517	4.42854	6.99188	7.77e-08	1.87e-06	7.73707
Slc16a12	-1.91088	1.09826	-6.87137	1.08e-07	2.47e-06	7.69829
Slc27a3	1.23545	3.78198	6.71958	1.65e-07	3.48e-06	7.10949
Slc25a12	-1.17407	6.31205	-6.7027	1.73e-07	3.64e-06	6.81331
Slc25a34	2.01964	-0.07349	6.65953	1.95e-07	4e-06	7.15042
Slc39a12	-1.23517	5.54837	-6.42825	3.73e-07	7e-06	6.05465
Slc22a8	-2.0855	0.472706	-6.42394	3.78e-07	7.08e-06	6.51769
Slc25a16	1.02188	3.92432	6.41956	3.82e-07	7.16e-06	6.19847
Slc41a3	1.38341	3.37432	6.40819	3.95e-07	7.37e-06	6.2429
Slc2a9	-1.86482	0.910895	-6.359	4.53e-07	8.29e-06	6.30284
Slc48a1	0.812431	6.87148	6.31562	5.12e-07	9.18e-06	5.67777
Slc38a11	-1.71361	0.124771	-6.30105	5.34e-07	9.48e-06	6.17898
Slc10a4	1.89353	1.01009	6.2302	6.52e-07	1.11e-05	5.96495
Slc2a1	-1.10735	6.43599	-6.10904	9.18e-07	1.5e-05	5.12341
Slc1a3	1.08341	10.3132	6.06606	1.04e-06	1.65e-05	4.92568
Slc7a3	2.11418	1.22528	5.85113	1.91e-06	2.76e-05	4.90758
Slc44a5	-0.84553	4.25494	-5.7498	2.55e-06	3.53e-05	4.25588
Slc5a7	1.83996	0.469689	5.69773	2.96e-06	4.01e-05	4.51333
Slc25a18	-0.88624	6.01305	-5.5913	4e-06	5.17e-05	3.65637
Slc12a9	1.21618	3.17088	5.55965	4.38e-06	5.58e-05	3.92496
Slco3a1	-1.04404	5.64245	-5.54049	4.63e-06	5.83e-05	3.5951
Slc19a1	0.902754	5.1786	5.46742	5.71e-06	6.99e-05	3.3887
Slc14a2	-1.30319	1.6835	-5.38348	7.25e-06	8.56e-05	3.54541
Slc16a14	0.791601	4.65588	4.99572	2.2e-05	0.000214	2.08894
Slc6a1	-0.5079	9.43308	-4.95279	2.49e-05	0.000237	1.7669
Slc25a42	0.874683	3.34397	4.94642	2.53e-05	0.000241	2.06593
Slc4a3	-0.76882	6.15519	-4.92023	2.73e-05	0.000256	1.76986
Slc7a8	0.938724	5.74024	4.91609	2.76e-05	0.000259	1.78689
Slc27a1	0.762	6.96459	4.79978	3.85e-05	0.000344	1.36852
Slco1c1	-0.57826	4.70217	-4.60119	6.78e-05	0.000549	0.93773
Slc1a5	1.26531	2.13091	4.57801	7.24e-05	0.000581	1.32695
Slc24a5	-1.2487	0.073355	-4.55059	7.83e-05	0.000623	1.34387
Slc29a2	0.593421	4.71194	4.53786	8.11e-05	0.000642	0.83703
Slc26a11	0.993767	2.56086	4.53489	8.18e-05	0.000647	1.07763
Slc11a1	-1.57387	1.8775	-4.37254	0.00013	0.000951	0.65752
Slc2a4	-0.88331	2.79874	-4.33708	0.000143	0.001038	0.477666
Slc7a2	-1.18105	3.60068	-4.24214	0.000187	0.001298	0.128431
Slc44a2	0.803398	6.06186	4.15709	0.000237	0.001582	-0.37842
Slc9a1	0.668414	5.54561	4.12477	0.00026	0.001703	-0.41511
Slc17a7	1.24553	7.54674	4.01227	0.000355	0.002181	-0.79087
Slc35f6	0.497869	5.33987	3.96494	0.000405	0.002426	-0.85228
Slc25a48	-1.23025	-0.27369	-3.89185	0.000496	0.002879	-0.41761
Slc12a7	-0.7803	4.39973	-3.79901	0.00064	0.003556	-1.1977
Slc35f5	-0.45267	5.05646	-3.77486	0.000684	0.003756	-1.32581
Slc8a1	1.43426	4.68501	3.77282	0.000688	0.003773	-1.11712
Slc15a3	-1.44235	1.59373	-3.69971	0.000839	0.004453	-1.07548
Slco2b1	-1.17463	0.9918	-3.68456	0.000875	0.004606	-1.06426
Slc2a6	-0.96068	4.14261	-3.63739	0.000994	0.005087	-1.45318
Slc25a44	0.453969	7.14536	3.61325	0.001061	0.005367	-1.86103
Slc14a1	1.18893	1.88699	3.5914	0.001126	0.005621	-1.30382
Slc29a3	0.480458	5.21391	3.47843	0.001525	0.007194	-2.1113
Slc8a3	0.80348	4.08324	3.40374	0.00186	0.008476	-2.12738
Slc18a3	1.02215	0.426834	3.28656	0.002534	0.010843	-1.98334
Slc31a2	-0.65261	2.8783	-3.18397	0.00331	0.013534	-2.53308
Slc46a3	-0.83367	1.28054	-3.14513	0.00366	0.01467	-2.46238
Slc9a5	-0.66394	3.46619	-3.09594	0.004153	0.016226	-2.77457
Slc6a19	-1.01865	0.122916	-3.09586	0.004154	0.016226	-2.43768
Slc16a7	-0.59706	5.81538	-3.05093	0.00466	0.017761	-3.18961
Slc35g2	0.618982	2.59991	3.04091	0.00478	0.018153	-2.87697
Slc15a1	-0.91578	0.383783	-3.04057	0.004784	0.018163	-2.5817
Slc37a2	-0.94822	1.27614	-3.00449	0.005243	0.019555	-2.75589
Slc26a1	0.956248	1.19655	2.98185	0.005552	0.020416	-2.78055
Slc38a1	0.451219	7.56087	2.9572	0.005908	0.021429	-3.51888
Slc6a8	0.498056	7.14201	2.93349	0.006271	0.022427	-3.56621
Slc35e2	0.42228	6.11703	2.93151	0.006302	0.022511	-3.52589
Slc43a3	-0.99047	1.71895	-2.92528	0.006402	0.022791	-3.03959
Slc30a10	0.876501	1.96116	2.85314	0.007663	0.026322	-3.11578
Slc16a6	0.398855	4.6809	2.84789	0.007763	0.026591	-3.6791
Slc35g1	-0.79679	1.55805	-2.83044	0.008106	0.027541	-3.18385
Slc43a1	0.875907	0.271596	2.79888	0.008762	0.029284	-3.14266
Slc18b1	0.491627	5.24567	2.793	0.008889	0.029609	-3.81042
Slc19a2	-0.49233	4.60216	-2.78392	0.00909	0.030121	-3.72364
Slc25a3	-0.38156	9.0132	-2.73951	0.010132	0.032775	-4.05012
Slc9a6	-0.35268	6.54872	-2.71491	0.010757	0.034323	-4.0351
Slc25a25	-0.59979	4.17901	-2.65893	0.012314	0.038239	-3.94504
Slc25a21	-0.86466	0.343656	-2.64077	0.012863	0.039389	-3.50869
Slc17a5	0.440472	3.72375	2.59706	0.014278	0.042989	-4.07715
Slc37a4	0.435595	5.05837	2.58248	0.014781	0.044124	-4.18802
Slc25a39	-0.32849	7.38793	-2.58127	0.014823	0.044214	-4.38046
Slc35b1	0.317026	6.27808	2.56265	0.015491	0.045723	-4.3693
Slc39a13	-0.35151	4.8719	-2.52768	0.016822	0.048952	-4.34543
Slc25a19	0.312989	5.15242	2.44053	0.020607	0.057591	-4.53793
Slc12a2	0.433838	6.48206	2.38151	0.023598	0.064115	-4.76165
Slc17a8	-0.64303	2.22994	-2.36485	0.02451	0.066168	-4.20773
Slc25a45	-0.64685	1.28446	-2.36183	0.024679	0.066487	-4.2303
Slc4a2	0.427143	5.27117	2.35743	0.024927	0.067055	-4.74757
Slc22a5	0.387264	4.41105	2.34675	0.025538	0.068226	-4.67213
Slc5a6	0.404902	4.37062	2.34198	0.025816	0.068852	-4.69422
Slc30a6	-0.37016	4.18252	-2.26008	0.031023	0.079555	-4.82718
Slc25a53	0.384381	3.04515	2.20817	0.034796	0.087306	-4.73694
Slc2a2	0.606931	-0.17615	2.20042	0.035394	0.088573	-4.31722
Slc16a3	0.822349	2.863	2.16351	0.038365	0.094383	-4.63012
Slc41a1	0.317576	7.20717	2.14067	0.040314	0.098052	-5.28651
Slc25a4	0.260646	10.0991	2.12456	0.041741	0.100754	-5.35158
Slc50a1	-0.41185	3.71558	-2.11991	0.042161	0.101523	-5.03924
Slc6a15	-0.31174	6.79367	-2.11122	0.042957	0.103013	-5.30141
Slc40a1	-0.61813	1.71782	-2.07475	0.046441	0.109288	-4.78897
Slc27a5	0.59682	-0.21419	2.0427	0.049707	0.115004	-4.63314
Slc4a5	0.743429	-0.10038	2.03495	0.050526	0.116355	-4.63824
Slc4a8	0.295779	6.06911	2.01492	0.052699	0.120444	-5.43505
Slc16a1	-0.34092	6.57706	-2.01086	0.053149	0.12126	-5.50692
Slc35a1	-0.40928	4.81724	-1.97391	0.057405	0.128438	-5.42958
Slc39a9	0.216235	6.21593	1.96728	0.058199	0.12971	-5.55423
Slc18a2	0.557634	0.269989	1.96266	0.058758	0.130636	-4.83342
Slc25a23	0.565776	7.51001	1.94103	0.061438	0.135148	-5.64933
Slc25a28	0.429495	3.9342	1.94103	0.061439	0.135148	-5.37088
Slc2a4rg-ps	0.683519	0.745433	1.92686	0.063251	0.13831	-4.92872
Slc39a8	0.584967	0.435844	1.91034	0.065423	0.142129	-4.9352
Slc24a2	0.433497	3.30503	1.90738	0.065818	0.142663	-5.2279
Slc30a5	0.238511	5.78791	1.89914	0.066931	0.144357	-5.64793
Slc25a37	-0.53385	0.455004	-1.88892	0.068335	0.146547	-4.95422
Slc7a5	0.252723	8.42696	1.88549	0.068812	0.147305	-5.76689
Slc5a5	0.587391	0.918507	1.85493	0.073185	0.154343	-5.04749
Slc8b1	0.463832	2.99779	1.85422	0.073289	0.154506	-5.38898
Slc25a26	0.299381	4.02661	1.84933	0.074013	0.155678	-5.54295
Slc12a8	0.60968	0.155452	1.82708	0.077376	0.161148	-5.06127
Slc35e1	0.286718	6.04812	1.82642	0.077478	0.161314	-5.7913
Slc45a4	0.319886	5.47896	1.8152	0.079226	0.164285	-5.75938
Slc22a3	0.659274	1.89721	1.81364	0.079471	0.164676	-5.19145
Slc37a1	0.473185	1.8863	1.7939	0.082636	0.16972	-5.29026
Slc35f1	-0.24188	7.06535	-1.79056	0.083182	0.170616	-5.88223
Slc23a2	0.453758	6.0351	1.77127	0.086395	0.175502	-5.88718
Slc30a7	0.275486	5.0574	1.75506	0.089177	0.179585	-5.82088
Slc25a17	0.189742	6.3284	1.75148	0.089801	0.180532	-5.93908
Slc16a10	-0.62032	0.974139	-1.72663	0.094236	0.186909	-5.2926
Slc25a24	-0.51349	1.3204	-1.69646	0.099869	0.195784	-5.43266
Slc13a5	0.414471	1.62372	1.693	0.100532	0.196762	-5.30515
Slc25a10	0.351894	4.24398	1.66038	0.106969	0.205854	-5.91181
Slc19a3	0.544505	-0.29285	1.644	0.110331	0.210606	-5.29261
Slc45a3	-0.45787	0.0372	-1.63973	0.111221	0.211794	-5.35328
Slc10a7	0.531201	0.966308	1.6374	0.111709	0.212304	-5.44363
Slc20a1	0.204839	7.01868	1.62754	0.113793	0.215063	-6.15904
Slc22a4	0.563032	2.11455	1.61827	0.115784	0.217913	-5.58635
Slc2a8	-0.22614	4.40628	-1.59531	0.120837	0.225005	-6.01464
Slc2a13	-0.27765	5.49505	-1.5887	0.122325	0.227128	-6.13263
Slc22a17	0.183707	9.53456	1.55929	0.129129	0.236701	-6.30825
Slc36a1	0.297145	4.75594	1.55678	0.129723	0.237426	-6.10372
Slc35c1	0.22622	4.81366	1.55165	0.130945	0.239023	-6.10225
Slc25a11	0.233366	6.75375	1.54718	0.132017	0.240703	-6.2791
Slc44a1	0.260239	6.45119	1.51917	0.138903	0.249896	-6.31063
Slc25a32	0.258552	3.29818	1.50973	0.141287	0.253113	-5.96692
Slc9a7	0.212662	6.01151	1.49433	0.145249	0.258144	-6.27669
Slc39a10	0.253261	6.4341	1.49259	0.1457	0.258659	-6.32488
Slc4a1ap	-0.26853	5.33815	-1.49086	0.146152	0.259301	-6.26076
Slco4c1	0.534445	0.864547	1.45584	0.155537	0.271987	-5.63243
Slc35a4	0.422253	1.95297	1.41508	0.167059	0.287101	-5.86633
Slc1a6	-0.32721	2.91868	-1.38376	0.176362	0.299433	-5.97079
Slc22a12	0.42658	0.144069	1.3476	0.187599	0.313765	-5.76113
Slc25a35	-0.45683	0.854879	-1.3389	0.190387	0.317025	-5.84924
Slc25a20	-0.21887	4.91749	-1.32813	0.193876	0.321085	-6.48286
Slco5a1	0.290743	4.18775	1.32188	0.195926	0.323713	-6.2675
Slc2a3	0.247675	7.02986	1.28641	0.207871	0.339084	-6.62837
Slc30a1	0.298583	3.12946	1.28619	0.207947	0.339084	-6.26746
Slc6a17	-0.26712	6.57572	-1.2671	0.2146	0.346178	-6.63092
Slc35a5	0.177624	6.24184	1.26394	0.215719	0.347483	-6.62642
Slc25a27	-0.20083	5.55582	-1.25621	0.218468	0.350927	-6.60646
Slc39a1	0.502671	1.50452	1.25267	0.219739	0.352534	-6.06033
Slc30a3	0.451743	3.50768	1.22903	0.228353	0.362387	-6.20359
Slc29a4	0.228808	5.56102	1.21824	0.232367	0.367175	-6.57142
Slc15a4	0.232494	3.74759	1.20862	0.23599	0.371469	-6.34921
Slc25a40	-0.20933	3.63941	-1.20486	0.237418	0.373308	-6.42225
Slc25a2	0.456945	0.414625	1.2036	0.237899	0.373903	-5.93189
Slc16a9	-0.25695	3.01871	-1.16904	0.251341	0.389548	-6.46808
Slc38a9	0.458897	-0.26292	1.16049	0.254752	0.393118	-5.9568
Slc6a7	0.408907	4.42833	1.12393	0.269714	0.409691	-6.46062
Slc8a2	-0.24896	7.0106	-1.11965	0.271506	0.411847	-6.81012
Slc7a14	0.212548	5.2039	1.1063	0.277149	0.417317	-6.70238
Slc37a3	0.123148	6.64378	1.08376	0.286869	0.428676	-6.85165
Slc12a5	-0.16837	7.15236	-1.05762	0.298441	0.44124	-6.89195
Slc35b4	-0.14689	5.93119	-1.0478	0.302868	0.446041	-6.8648
Slc7a6os	-0.22314	4.62887	-1.03069	0.310697	0.454264	-6.72766
Slc1a4	0.200305	7.06489	1.02835	0.311782	0.455202	-6.92082
Slc7a7	0.295077	1.56845	1.00497	0.322728	0.46691	-6.32282
Slc17a6	0.236197	4.96517	0.999159	0.32549	0.46963	-6.79434
Slc25a30	0.138689	4.93285	0.978182	0.335593	0.480339	-6.83092
Slc27a6	0.349923	-0.32766	0.97204	0.338591	0.483239	-6.14885
Slc25a15	0.148355	4.565	0.959894	0.344572	0.489361	-6.82418
Slc36a2	0.343992	-0.02131	0.954122	0.347438	0.491796	-6.17497
Slc35e4	-0.15542	4.94033	-0.92604	0.361614	0.505991	-6.88534
Slc39a11	-0.13188	5.2386	-0.91431	0.367645	0.512076	-6.92527
Slc9a9	0.168174	3.8695	0.887813	0.381511	0.525942	-6.7489
Slc6a9	-0.13195	5.80008	-0.86744	0.392396	0.536979	-7.01524
Slc39a14	0.153349	3.93146	0.866501	0.392905	0.537419	-6.78471
Slc24a3	0.150259	6.52852	0.849266	0.402276	0.545869	-7.07466
Slc25a14	-0.14245	5.63818	-0.84818	0.402869	0.546416	-7.00467
Slc22a15	0.196894	2.4739	0.827072	0.414548	0.556893	-6.55571
Slc25a38	0.142038	4.60339	0.826698	0.414757	0.55699	-6.91346
Slc41a2	0.143703	4.85585	0.812111	0.42295	0.564431	-6.95983
Slc38a2	-0.08955	7.66598	-0.7911	0.434927	0.575548	-7.1393
Slc6a6	0.117142	7.50999	0.760551	0.452699	0.592839	-7.17161
Slc26a7	0.267132	0.739401	0.741169	0.464195	0.604039	-6.38826
Slc27a2	0.220511	0.779939	0.738077	0.466045	0.605677	-6.41959
Slc4a11	0.223791	1.04122	0.735355	0.467677	0.606781	-6.46166
Slc35a3	-0.1799	2.9528	-0.73299	0.469097	0.607938	-6.77111
Slc38a3	-0.11199	7.07893	-0.72469	0.474103	0.612547	-7.2111
Slc25a46	-0.12088	5.98896	-0.71159	0.482066	0.619879	-7.14894
Slc13a4	-0.20922	-0.097	-0.69902	0.489776	0.626875	-6.35123
Slc36a4	0.10363	6.23417	0.695205	0.49213	0.629103	-7.17818
Slc22a18	-0.2034	-0.21094	-0.64594	0.523093	0.656759	-6.44022
Slc35f2	0.145277	3.6493	0.634358	0.530523	0.663519	-6.81729
Slc29a1	-0.16017	2.58444	-0.62806	0.534588	0.667038	-6.71451
Slc9a3r1	-0.09123	6.12322	-0.62802	0.534611	0.667038	-7.2221
Slc7a6	0.084897	5.58686	0.619145	0.540366	0.671809	-7.16396
Slc15a2	-0.08142	4.78728	-0.60802	0.547625	0.677899	-7.15179
Slc9a3r2	-0.10027	4.6452	-0.5605	0.579186	0.704401	-7.1483
Slc3a2	-0.12309	7.48051	-0.54613	0.588902	0.712537	-7.32697
Slc24a4	0.172009	3.2445	0.508114	0.614988	0.734813	-7.06159
Slc16a2	-0.0803	7.68581	-0.47774	0.636202	0.751532	-7.36045
Slc35f4	-0.08685	3.48224	-0.47735	0.636479	0.751797	-7.01512
Slc30a9	-0.06789	6.42851	-0.47607	0.637378	0.752496	-7.31015
Slc22a23	-0.05837	6.96841	-0.45721	0.650725	0.762853	-7.34892
Slc39a3	0.069558	5.88825	0.44671	0.658205	0.768485	-7.30725
Slc35f3	-0.07651	4.27385	-0.43231	0.668524	0.776425	-7.16938
Slc25a13	-0.12499	1.80848	-0.42713	0.672249	0.779458	-6.77828
Slc26a10	-0.13288	-0.15887	-0.39778	0.69353	0.795247	-6.5493
Slc25a29	0.071194	3.79496	0.387807	0.700822	0.800905	-7.0493
Slc13a3	-0.08503	3.74701	-0.36957	0.714226	0.811592	-7.13567
Slc11a2	-0.04331	6.4859	-0.35724	0.723344	0.819037	-7.37245
Slc30a4	-0.05193	5.9303	-0.35631	0.724032	0.819359	-7.34373
Slc31a1	-0.0362	7.09729	-0.35532	0.724769	0.819531	-7.40475
Slc4a4	-0.0857	7.50225	-0.33458	0.740207	0.830535	-7.42785
Slc27a4	0.061696	7.89014	0.328416	0.744816	0.833882	-7.43214
Slc26a8	-0.08793	1.33849	-0.32643	0.746302	0.835025	-6.71393
Slc35b3	0.053609	3.25033	0.312073	0.757084	0.841778	-7.02497
Slc35a2	0.03715	5.99573	0.278243	0.782682	0.859789	-7.38041
Slc26a2	-0.05103	2.81679	-0.27163	0.787713	0.863334	-7.00321
Slc2a10	-0.07038	1.52242	-0.26027	0.796385	0.869363	-6.80346
Slc7a4	0.041107	5.0979	0.254325	0.800932	0.872476	-7.28394
Slc45a1	-0.03644	5.68227	-0.19453	0.847033	0.904426	-7.33548
Slco4a1	0.069081	0.061801	0.191834	0.849129	0.905561	-6.59443
Slc38a7	0.030346	4.45446	0.16849	0.867298	0.917579	-7.2096
Slc35b2	0.02715	5.34646	0.167767	0.867862	0.9178	-7.37452
Slc4a7	-0.02757	5.14641	-0.16681	0.868609	0.918173	-7.31852
Slc39a6	0.019333	5.89323	0.140062	0.889522	0.932708	-7.39327
Slc2a12	0.039502	1.38182	0.128051	0.89894	0.938842	-6.79476
Slc33a1	-0.01459	4.86786	-0.10982	0.913265	0.948283	-7.30981
Slc9a2	0.039984	0.47535	0.109816	0.913267	0.948283	-6.67994
Slc3a1	0.045097	0.07201	0.10875	0.914105	0.948925	-6.62468
Slc25a51	0.015339	6.51662	0.106186	0.916122	0.950263	-7.44082
Slc12a4	0.016579	3.78235	0.098109	0.922481	0.953642	-7.16554
Slc25a22	0.01744	7.90703	0.095809	0.924292	0.955129	-7.47864
Slc38a6	-0.01575	3.58149	-0.08731	0.93099	0.959242	-7.13039
Slc4a10	-0.01971	4.99098	-0.07689	0.939211	0.963692	-7.31468
Slc6a3	-0.02577	0.207741	-0.06883	0.945572	0.967434	-6.65398
Slc35d1	0.009404	4.37451	0.058769	0.953515	0.97282	-7.26514
Slc25a33	-0.01415	2.63445	-0.04903	0.961214	0.977065	-6.92464
Slc52a2	-0.00643	4.22305	-0.03953	0.96872	0.981868	-7.20383
Slc35c2	-0.00549	4.95024	-0.03291	0.973955	0.985117	-7.332
Slc26a6	0.004744	3.45967	0.022344	0.982317	0.989552	-7.07203
Slc25a1	0.002808	7.06196	0.02051	0.983769	0.99073	-7.45789
Slc35d2	0.005407	0.210344	0.016863	0.986654	0.99239	-6.67334
Slc46a1	0.004982	1.33274	0.016231	0.987155	0.992615	-6.78334
Slc7a1	-0.00182	5.87094	-0.0128	0.989873	0.994513	-7.39215
Slc16a13	0.002334	2.73032	0.00968	0.992339	0.996084	-6.97764

## Sheet: Starved -aa
Gene expression of KO PCNCS against WT AT amino acid starved (starved -AA2HR Condition)
Gene	logFC	AveExpr	t	P.Value	adj.P.Val	B
Nr4a1	3.71892	6.37817	18.8136	1.84e-18	2.64e-14	32.1257
Hmox1	-3.68167	6.98741	-18.1367	5.2e-18	3.74e-14	31.1091
Npas4	6.12625	2.95298	15.5483	3.82e-16	1.83e-12	26.5999
Lgals1	-3.73372	5.52573	-15.1752	7.42e-16	2.19e-12	26.1843
Emp1	-4.62268	4.49115	-15.16	7.63e-16	2.19e-12	26.0754
Slc38a10	-6.2049	4.36971	-14.8194	1.42e-15	3.39e-12	25.4041
Lyz2	-5.07895	5.25605	-14.7324	1.66e-15	3.41e-12	25.3827
Fmod	-4.57499	3.99262	-14.5392	2.38e-15	4.04e-12	24.9653
Ephx1	-2.71057	8.1178	-14.5054	2.53e-15	4.04e-12	24.9461
Akr1c14	-3.81797	3.38116	-14.0947	5.48e-15	7.34e-12	24.1567
Cxcl10	-3.98423	3.34372	-14.0814	5.62e-15	7.34e-12	24.1275
Igf2	-3.74452	5.12611	-14.0315	6.19e-15	7.4e-12	24.0868
Fcer1g	-5.15856	3.77268	-13.5512	1.57e-14	1.62e-11	23.1231
B2m	-2.39534	7.34508	-13.5457	1.58e-14	1.62e-11	23.1076
Pltp	-2.72234	5.90501	-13.4224	2.02e-14	1.93e-11	22.9049
Plin2	-2.95778	5.55107	-13.2484	2.85e-14	2.56e-11	22.5703
Osgin1	-4.22649	2.68782	-13.0832	3.96e-14	3.35e-11	22.1664
Hbp1	-2.06466	6.38491	-12.9495	5.19e-14	4.14e-11	21.9425
1500015O10Rik	-3.88284	4.66651	-12.9036	5.7e-14	4.31e-11	21.8883
P3h2	-3.84451	3.94742	-12.8503	6.35e-14	4.39e-11	21.7761
Lgals9	-4.06394	1.63412	-12.8443	6.43e-14	4.39e-11	21.6129
Capg	-4.42797	1.90399	-12.7956	7.1e-14	4.55e-11	21.5415
Ctsd	-2.5699	10.3675	-12.7645	7.56e-14	4.55e-11	21.512
Bst2	-4.40977	2.45481	-12.7615	7.61e-14	4.55e-11	21.5256
Egr1	2.66039	8.19007	12.6933	8.75e-14	4.89e-11	21.3801
Ogn	-3.96626	3.76879	-12.6876	8.85e-14	4.89e-11	21.444
Foxj1	-3.33877	6.08956	-12.6015	1.06e-13	5.62e-11	21.2562
Ctsh	-3.34918	2.24602	-12.4781	1.36e-13	6.95e-11	20.9617
Ccl3	-4.29267	2.14157	-12.4641	1.4e-13	6.95e-11	20.9423
Lcn2	-3.65616	0.372179	-12.4379	1.48e-13	7.1e-11	20.754
Plau	-4.58015	2.1887	-12.3963	1.62e-13	7.49e-11	20.7945
Adgre1	-4.20066	1.38129	-12.3254	1.88e-13	8.2e-11	20.6134
Acta2	-3.35762	5.637	-12.3229	1.89e-13	8.2e-11	20.6797
Col3a1	-4.04082	3.80651	-12.2921	2.01e-13	8.49e-11	20.6374
Arc	3.83972	3.27041	12.2518	2.19e-13	8.64e-11	20.5494
Fcgr3	-2.70654	2.96301	-12.2483	2.2e-13	8.64e-11	20.5502
Unc93b1	-4.33759	2.56102	-12.2372	2.26e-13	8.64e-11	20.4884
C3	-6.89721	2.57966	-12.2311	2.29e-13	8.64e-11	20.4557
Hpgds	-4.01197	2.22377	-12.1391	2.78e-13	1.02e-10	20.2612
Vim	-2.58902	9.60125	-12.0404	3.42e-13	1.23e-10	19.9958
Pld4	-4.21296	1.61914	-11.985	3.85e-13	1.31e-10	19.9165
Anxa3	-3.21375	2.84464	-11.9846	3.85e-13	1.31e-10	19.9773
Casq1	-3.91871	2.50746	-11.9645	4.02e-13	1.31e-10	19.9173
Adam8	-3.55395	2.90676	-11.9641	4.03e-13	1.31e-10	19.9489
Ms4a6c	-3.73877	1.2828	-11.9254	4.37e-13	1.38e-10	19.7946
Lcp2	-4.19485	1.36429	-11.9189	4.43e-13	1.38e-10	19.7599
Cryab	-3.05905	5.51188	-11.8694	4.93e-13	1.51e-10	19.7217
Tm4sf1	-4.19888	2.6165	-11.8579	5.05e-13	1.51e-10	19.6998
Lect1	-3.47555	2.63558	-11.8063	5.65e-13	1.65e-10	19.6005
Cxcl16	-3.72331	1.79704	-11.7244	6.74e-13	1.9e-10	19.3927
Gpnmb	-4.4846	4.13898	-11.7197	6.81e-13	1.9e-10	19.4453
Cybrd1	-2.49952	4.30726	-11.7138	6.89e-13	1.9e-10	19.4319
Cd300c2	-3.41151	0.61343	-11.6709	7.57e-13	2.05e-10	19.21
Nckap1l	-3.80497	2.12708	-11.6613	7.73e-13	2.05e-10	19.2738
Cd33	-2.94427	0.0751553	-11.6438	8.02e-13	2.1e-10	19.1233
Tlr7	-3.74302	1.38151	-11.555	9.74e-13	2.5e-10	19.0174
Sdc2	-1.57628	6.90997	-11.5408	1e-12	2.5e-10	18.943
Fcrls	-4.6226	2.27933	-11.5378	1.01e-12	2.5e-10	19.0265
Nr4a3	2.42049	4.28489	11.5168	1.06e-12	2.57e-10	19.0014
Scd4	-3.63799	2.41343	-11.5097	1.08e-12	2.57e-10	18.9542
Anxa5	-2.72083	6.78046	-11.478	1.15e-12	2.71e-10	18.8216
Arl4d	2.06465	4.01684	11.4579	1.2e-12	2.71e-10	18.8768
Itgam	-4.09088	1.7295	-11.4577	1.21e-12	2.71e-10	18.8391
Hapln1	-2.42272	5.51656	-11.4574	1.21e-12	2.71e-10	18.8195
Glipr1	-4.08366	1.37053	-11.3962	1.38e-12	3.05e-10	18.6963
Lgals3bp	-3.19432	4.24692	-11.3552	1.51e-12	3.28e-10	18.6545
Grn	-1.84635	7.69801	-11.3486	1.53e-12	3.28e-10	18.5036
Fli1	-3.271	1.04741	-11.3198	1.63e-12	3.45e-10	18.5038
Arrdc3	1.76784	6.07909	11.1748	2.25e-12	4.69e-10	18.2003
Wisp2	-4.94574	2.68548	-11.1482	2.39e-12	4.91e-10	18.1822
Itgb2	-4.24276	1.94155	-11.1151	2.58e-12	5.21e-10	18.1084
Fos	3.04665	6.54892	11.1007	2.66e-12	5.31e-10	17.962
Dab2	-3.09446	5.15403	-11.0683	2.86e-12	5.57e-10	18.0026
Serpinf1	-2.6636	3.39043	-11.0664	2.87e-12	5.57e-10	18.0259
Cybb	-3.83812	1.30882	-11.0329	3.1e-12	5.91e-10	17.9022
Tyrobp	-4.51001	3.95334	-11.0287	3.13e-12	5.91e-10	17.9418
Lcp1	-3.75918	3.80758	-11.0166	3.21e-12	5.96e-10	17.9163
Tgif1	-3.65385	4.36902	-11.0131	3.24e-12	5.96e-10	17.9053
Tgfbr2	-3.87108	2.36299	-11.0028	3.31e-12	6.02e-10	17.8704
Csf1r	-4.14364	2.06266	-10.9857	3.44e-12	6.14e-10	17.8307
Plek	-3.28585	3.74337	-10.9832	3.46e-12	6.14e-10	17.8385
Ctsz	-3.19613	4.68566	-10.9638	3.62e-12	6.34e-10	17.7694
Mxra8	-2.93779	3.98421	-10.9396	3.82e-12	6.61e-10	17.7431
Cd53	-3.53803	1.56995	-10.9286	3.92e-12	6.65e-10	17.6877
Thbs1	-3.21837	6.13237	-10.9222	3.97e-12	6.65e-10	17.627
Slfn2	-3.4156	1.08537	-10.9214	3.98e-12	6.65e-10	17.6708
Rgs1	-3.19639	0.124207	-10.902	4.16e-12	6.87e-10	17.5653
Apod	-2.75208	4.74852	-10.8552	4.63e-12	7.55e-10	17.5141
Ccdc40	-2.6485	3.84616	-10.8412	4.77e-12	7.71e-10	17.5238
Omd	-3.24494	0.618645	-10.817	5.04e-12	8.05e-10	17.3909
Casp12	-3.53438	0.938262	-10.8061	5.17e-12	8.16e-10	17.3815
Snhg11	2.24752	6.20403	10.7785	5.51e-12	8.6e-10	17.2581
Csf1	-2.73368	6.26394	-10.7473	5.91e-12	9.13e-10	17.2146
Col4a1	-1.99734	6.21741	-10.7272	6.19e-12	9.46e-10	17.1338
Dlk1	-2.69026	5.4935	-10.6978	6.62e-12	1e-09	17.111
Tnfaip2	-3.18052	1.56566	-10.692	6.71e-12	1e-09	17.1774
Wfdc17	-3.56039	1.36793	-10.6085	8.13e-12	1.2e-09	16.9682
C1qb	-4.68036	4.1108	-10.6052	8.19e-12	1.2e-09	16.9925
Ddit4l	-3.39663	3.89681	-10.6022	8.25e-12	1.2e-09	16.9885
Fyb	-3.5479	1.1815	-10.5575	9.14e-12	1.31e-09	16.8584
Spi1	-3.97748	1.81402	-10.5257	9.84e-12	1.38e-09	16.8023
Actn4	-2.43046	5.99797	-10.5242	9.87e-12	1.38e-09	16.7062
Ltbp2	-4.46036	1.88755	-10.5212	9.94e-12	1.38e-09	16.7784
Ctss	-4.68137	3.00114	-10.5193	9.99e-12	1.38e-09	16.801
Col1a1	-3.67179	4.81304	-10.5086	1.02e-11	1.4e-09	16.7459
Dcxr	-2.24482	4.53042	-10.481	1.09e-11	1.48e-09	16.6759
Gbp5	-3.16691	0.605474	-10.4764	1.1e-11	1.48e-09	16.6426
Cx3cr1	-3.62755	2.13654	-10.4707	1.12e-11	1.49e-09	16.6849
A730049H05Rik	-3.44991	2.31026	-10.4589	1.15e-11	1.51e-09	16.6578
Parp14	-3.41129	0.796623	-10.457	1.15e-11	1.51e-09	16.6034
Runx1	-3.56013	1.14797	-10.4495	1.17e-11	1.51e-09	16.6203
Tnfrsf1b	-4.06113	2.17396	-10.4475	1.18e-11	1.51e-09	16.6303
Mkrn1	-3.67222	3.11429	-10.3968	1.33e-11	1.67e-09	16.5216
Cd52	-4.55071	2.11517	-10.3965	1.33e-11	1.67e-09	16.5174
Ifi30	-1.71224	4.82431	-10.3923	1.34e-11	1.67e-09	16.4223
Angpt1	-2.30268	5.04501	-10.3908	1.35e-11	1.67e-09	16.4232
Ddr2	-3.09022	2.88196	-10.3721	1.41e-11	1.71e-09	16.4631
Cd72	-4.09615	1.70603	-10.3712	1.41e-11	1.71e-09	16.4541
Pi15	-3.14469	2.6712	-10.3587	1.45e-11	1.75e-09	16.4319
Nr4a2	2.66429	4.30294	10.3142	1.61e-11	1.93e-09	16.2826
Stab1	-4.21573	3.52231	-10.3087	1.63e-11	1.93e-09	16.3162
Ptpn6	-3.23012	1.20445	-10.2857	1.72e-11	2.02e-09	16.23
Vav1	-3.63877	1.37757	-10.2802	1.74e-11	2.03e-09	16.2354
Sik1	1.79059	5.77099	10.2394	1.92e-11	2.22e-09	16.0229
Ncf1	-3.88886	1.11034	-10.2235	1.99e-11	2.29e-09	16.0949
Laptm5	-4.44567	4.5906	-10.2037	2.09e-11	2.38e-09	16.0461
2410004P03Rik	-2.93739	4.12051	-10.1858	2.18e-11	2.46e-09	16.0036
Otx2	-2.97903	3.17456	-10.1814	2.2e-11	2.46e-09	16.0256
Jam3	-1.59293	6.09593	-10.1795	2.21e-11	2.46e-09	15.869
Gbp3	-3.53582	2.69528	-10.1731	2.24e-11	2.48e-09	16.006
Prrg4	-2.68968	2.38362	-10.1664	2.28e-11	2.48e-09	15.9886
A2m	-3.18465	3.64783	-10.164	2.29e-11	2.48e-09	15.9694
Pik3ap1	-3.84284	1.83197	-10.1636	2.29e-11	2.48e-09	15.9791
Eda2r	-2.96858	4.32274	-10.1509	2.36e-11	2.53e-09	15.9333
Cav1	2.29732	4.046	10.1364	2.44e-11	2.6e-09	15.8761
Traf1	-2.79297	1.85607	-10.1324	2.47e-11	2.61e-09	15.9003
Drc7	-2.64484	2.25482	-10.0869	2.75e-11	2.88e-09	15.8074
Cd180	-4.1633	1.75405	-10.0782	2.8e-11	2.92e-09	15.7728
Clec7a	-3.35367	2.70925	-10.0513	2.99e-11	3.09e-09	15.721
C3ar1	-3.60571	2.32918	-10.0161	3.25e-11	3.33e-09	15.6426
Crb2	-3.23592	3.32741	-10.0063	3.33e-11	3.39e-09	15.6147
Emp3	-3.13358	2.26456	-9.99744	3.4e-11	3.44e-09	15.5987
Col18a1	-2.81589	3.31631	-9.97985	3.54e-11	3.56e-09	15.5516
Pxdc1	-1.9982	4.14394	-9.93387	3.95e-11	3.94e-09	15.3968
Ucp2	-2.61523	4.58016	-9.92347	4.05e-11	4.01e-09	15.3449
Tgfb1	-3.21505	2.30717	-9.91842	4.1e-11	4.04e-09	15.4141
Dnali1	-2.6785	3.3499	-9.90557	4.23e-11	4.13e-09	15.3675
Marco	-3.14441	0.187471	-9.87608	4.54e-11	4.4e-09	15.2782
Adam19	1.97535	4.73976	9.84348	4.91e-11	4.73e-09	15.1429
H2-K1	-1.78228	6.18977	-9.82125	5.18e-11	4.96e-09	14.9825
Lbp	-2.88309	2.30221	-9.81841	5.21e-11	4.96e-09	15.1778
Ifi27	-2.67604	3.05385	-9.81362	5.27e-11	4.98e-09	15.1617
Nfe2l3	2.56124	2.64352	9.8082	5.34e-11	5e-09	15.1523
Spp1	-3.87505	4.64683	-9.80715	5.36e-11	5e-09	15.1092
Klhdc7a	-3.13696	1.87266	-9.78241	5.68e-11	5.27e-09	15.0719
Slc38a2	-1.1466	7.66598	-9.77984	5.72e-11	5.27e-09	14.8437
Ctla2a	-3.79103	0.479086	-9.76203	5.97e-11	5.46e-09	15.0252
Vcam1	-1.74087	5.78031	-9.7578	6.03e-11	5.48e-09	14.8685
Csf2rb2	-3.24489	0.770582	-9.74454	6.23e-11	5.63e-09	14.979
Nfe2l2	-2.36286	5.69126	-9.73848	6.32e-11	5.67e-09	14.8578
Sparc	-3.02808	9.6554	-9.71918	6.62e-11	5.91e-09	14.683
Msn	-2.48415	6.08336	-9.71644	6.67e-11	5.91e-09	14.7825
P4ha3	-2.25654	5.27789	-9.71014	6.77e-11	5.96e-09	14.7885
Hcls1	-4.28716	1.94951	-9.69792	6.97e-11	6.1e-09	14.8929
Adamtsl3	-3.25192	2.21649	-9.65097	7.81e-11	6.8e-09	14.783
Anxa4	-2.85794	4.02987	-9.64468	7.93e-11	6.86e-09	14.729
Milr1	-3.14969	0.606608	-9.63362	8.15e-11	7.01e-09	14.7183
Ms4a7	-3.7924	0.917889	-9.6243	8.33e-11	7.12e-09	14.7042
Fosb	3.95515	3.16189	9.61992	8.42e-11	7.16e-09	14.6819
Map3k7cl	-2.86312	0.507604	-9.6119	8.59e-11	7.25e-09	14.6575
Ston1	-2.80524	3.75654	-9.60793	8.67e-11	7.28e-09	14.6691
Il10ra	-3.5155	0.791155	-9.60144	8.81e-11	7.32e-09	14.6532
Cd109	-3.59781	3.37784	-9.6008	8.82e-11	7.32e-09	14.652
Heg1	-3.0071	5.27444	-9.59219	9.01e-11	7.44e-09	14.529
Ly86	-3.24083	0.988276	-9.58075	9.26e-11	7.6e-09	14.6044
Aif1	-3.10734	1.79793	-9.57476	9.4e-11	7.67e-09	14.6016
Trim30a	-3.57068	1.28825	-9.55595	9.84e-11	7.98e-09	14.543
Rnh1	-1.45849	5.17842	-9.55062	9.97e-11	8.04e-09	14.4033
Tap2	-2.72872	3.52223	-9.51037	1.1e-10	8.82e-09	14.428
Vegfa	1.82797	5.95969	9.4778	1.19e-10	9.5e-09	14.1533
Tnfrsf10b	-2.70746	3.43467	-9.44791	1.28e-10	1.02e-08	14.2852
Bmp6	-2.92817	5.75696	-9.44204	1.3e-10	1.03e-08	14.1289
Cfap52	-2.5448	2.34091	-9.42573	1.35e-10	1.06e-08	14.24
Myo1e	-2.69625	5.10251	-9.41067	1.4e-10	1.1e-08	14.1071
Cp	-3.73103	1.42879	-9.40758	1.41e-10	1.1e-08	14.1999
Mmp12	-3.1689	0.747246	-9.39523	1.46e-10	1.13e-08	14.1572
Folr1	-3.24655	1.86355	-9.39131	1.47e-10	1.13e-08	14.1599
Npvf	-3.19223	1.80365	-9.3758	1.53e-10	1.17e-08	14.121
Ddhd1	1.10211	6.80461	9.36987	1.55e-10	1.18e-08	13.858
Ctsb	-1.50678	10.0443	-9.36256	1.58e-10	1.19e-08	13.798
Prelp	-2.87132	5.06995	-9.33085	1.71e-10	1.28e-08	13.9267
Dynlrb2	-2.51857	3.56809	-9.32333	1.74e-10	1.3e-08	13.9451
Ajuba	-3.08333	3.1838	-9.32135	1.75e-10	1.3e-08	13.992
AI607873	-3.0225	0.869309	-9.30801	1.81e-10	1.33e-08	13.9521
Hif3a	2.84754	1.24794	9.30755	1.81e-10	1.33e-08	13.9457
Lama4	-2.46573	2.91464	-9.2968	1.86e-10	1.36e-08	13.9224
Ppp1r3c	1.42062	5.79846	9.27002	1.99e-10	1.45e-08	13.704
St5	-1.66653	5.23991	-9.26571	2.01e-10	1.46e-08	13.7047
Scpep1	-1.71752	7.07245	-9.25516	2.06e-10	1.49e-08	13.5789
Lpar4	-2.22296	3.30225	-9.24828	2.1e-10	1.5e-08	13.7912
Fstl1	-1.48432	8.05393	-9.2476	2.1e-10	1.5e-08	13.5325
Stard8	-2.93807	4.13267	-9.24241	2.13e-10	1.51e-08	13.7651
Tcp11l2	-1.65296	5.68293	-9.23429	2.17e-10	1.54e-08	13.5845
Slc40a1	-3.02263	1.71782	-9.22941	2.2e-10	1.55e-08	13.7709
St3gal6	-1.85909	3.64671	-9.22603	2.21e-10	1.55e-08	13.7206
Ntsr2	1.86553	5.71423	9.21731	2.26e-10	1.58e-08	13.5496
Ptpn14	-2.39127	3.81545	-9.20477	2.33e-10	1.62e-08	13.6748
Dock2	-2.91597	0.537519	-9.193	2.4e-10	1.66e-08	13.6681
Abcc3	-3.58615	1.08584	-9.18368	2.46e-10	1.69e-08	13.6572
Inpp5d	-3.5304	1.35083	-9.17378	2.52e-10	1.72e-08	13.6357
Col22a1	-2.86631	2.52682	-9.17136	2.54e-10	1.73e-08	13.6246
Lox	-2.89895	3.61957	-9.16989	2.55e-10	1.73e-08	13.5892
1700007K13Rik	-1.79745	3.61231	-9.16779	2.56e-10	1.73e-08	13.5693
Palld	-2.63032	6.42908	-9.16179	2.6e-10	1.74e-08	13.4087
Lgals3	-4.11334	2.24258	-9.15878	2.62e-10	1.75e-08	13.5976
Pdgfrl	-2.44956	4.30754	-9.1453	2.71e-10	1.8e-08	13.5112
Wwc1	-1.81115	7.17894	-9.12431	2.85e-10	1.89e-08	13.2417
Sctr	-2.632	0.922662	-9.1071	2.98e-10	1.96e-08	13.4674
Tagln3	1.32807	7.95528	9.10463	3e-10	1.96e-08	13.1738
Rac2	-3.58853	0.863797	-9.09582	3.06e-10	1.99e-08	13.4415
Cyba	-3.64468	2.5634	-9.09579	3.06e-10	1.99e-08	13.4418
Alox5ap	-3.59752	0.466622	-9.08599	3.14e-10	2.03e-08	13.4149
Rab31	-1.34001	7.82652	-9.085	3.15e-10	2.03e-08	13.1263
Dock8	-3.33876	1.46139	-9.0829	3.16e-10	2.03e-08	13.4119
Cd59a	-2.04562	3.08672	-9.07835	3.2e-10	2.04e-08	13.3725
Rora	-1.83175	5.42766	-9.06744	3.29e-10	2.09e-08	13.19
Cmklr1	-2.74561	0.921944	-9.06589	3.3e-10	2.09e-08	13.3647
Btg2	1.71439	4.84728	9.06123	3.34e-10	2.1e-08	13.2557
H2-Q4	-3.30321	2.41695	-9.05837	3.36e-10	2.11e-08	13.3479
Bgn	-2.4267	5.00792	-9.04765	3.46e-10	2.16e-08	13.1924
Plscr2	-3.00001	2.08372	-9.04367	3.49e-10	2.17e-08	13.3159
Clic1	-2.22858	5.5371	-9.03452	3.57e-10	2.21e-08	13.1167
Kif27	-2.50145	3.39676	-9.02733	3.64e-10	2.24e-08	13.2436
Rcsd1	-2.70982	1.45238	-9.01591	3.74e-10	2.3e-08	13.249
Ptpn21	-2.28893	4.01354	-9.00402	3.85e-10	2.36e-08	13.1537
Ptp4a3	1.37576	5.6652	8.99328	3.96e-10	2.41e-08	12.9757
Rassf4	-3.08632	3.59811	-8.98245	4.07e-10	2.47e-08	13.1216
Arl11	-3.25152	0.789835	-8.98075	4.09e-10	2.47e-08	13.1632
Cxcr4	-2.26711	5.79106	-8.97474	4.15e-10	2.49e-08	12.9749
Phlda3	-1.92139	4.98056	-8.95899	4.32e-10	2.58e-08	12.9576
Ak9	-2.60336	2.15993	-8.95039	4.41e-10	2.63e-08	13.0816
Arhgap25	-3.13972	1.44276	-8.94882	4.43e-10	2.63e-08	13.086
Frmd6	-2.21417	2.44936	-8.94745	4.44e-10	2.63e-08	13.0774
Hk3	-3.50959	1.09915	-8.94355	4.49e-10	2.64e-08	13.0715
Tnfrsf1a	-1.79225	5.10079	-8.93672	4.57e-10	2.68e-08	12.8793
Pqlc3	-2.83381	2.83222	-8.93347	4.6e-10	2.69e-08	13.0359
Oasl2	-3.48641	2.03357	-8.91991	4.76e-10	2.77e-08	13.0058
Apobr	-2.80618	0.862517	-8.91338	4.84e-10	2.8e-08	12.9934
Madcam1	-2.59258	0.113254	-8.90674	4.92e-10	2.84e-08	12.9696
Mmp2	-2.71251	2.74027	-8.90509	4.94e-10	2.84e-08	12.9736
Nid1	-2.99853	4.79615	-8.90276	4.97e-10	2.85e-08	12.877
Psmb8	-3.20274	1.84536	-8.89947	5.01e-10	2.86e-08	12.9645
Ccl5	-2.94827	0.247684	-8.89498	5.07e-10	2.88e-08	12.9483
Ptpn13	-3.15154	3.82329	-8.88836	5.16e-10	2.92e-08	12.8833
Kcng1	2.36434	4.90889	8.88407	5.21e-10	2.94e-08	12.7243
Trem2	-4.09517	3.0906	-8.86269	5.5e-10	3.09e-08	12.8471
Cald1	-1.965	6.30711	-8.86	5.54e-10	3.1e-08	12.614
Ttc25	-2.50322	2.30392	-8.85677	5.59e-10	3.11e-08	12.8532
Sv2c	-1.28472	5.25474	-8.85337	5.63e-10	3.12e-08	12.6566
Sstr4	2.13739	4.80868	8.83911	5.84e-10	3.23e-08	12.6397
Npas2	1.85075	4.554	8.83111	5.96e-10	3.28e-08	12.6546
Mir670hg	1.65134	3.54137	8.81831	6.16e-10	3.36e-08	12.7093
Lat2	-2.22864	2.51261	-8.81809	6.16e-10	3.36e-08	12.744
Ldb2	1.97906	7.14809	8.81682	6.18e-10	3.36e-08	12.4566
Nes	-1.91916	7.10244	-8.80712	6.33e-10	3.43e-08	12.4481
Itga1	-3.29308	3.18923	-8.8025	6.41e-10	3.46e-08	12.7008
Barx2	2.25516	2.48005	8.78559	6.69e-10	3.59e-08	12.6694
Fbxo32	-2.43421	4.17718	-8.78463	6.71e-10	3.59e-08	12.5812
Lrrc23	-2.45771	2.79023	-8.75549	7.22e-10	3.85e-08	12.5602
Cebpa	-2.08087	2.44412	-8.75449	7.24e-10	3.85e-08	12.5838
Cd300a	-2.80772	1.11533	-8.74725	7.37e-10	3.9e-08	12.5883
Serpinh1	-1.93476	6.59763	-8.74645	7.39e-10	3.9e-08	12.3124
Clec4d	-3.10786	0.345389	-8.73927	7.53e-10	3.96e-08	12.5654
Rsph4a	-2.48729	3.1114	-8.73509	7.61e-10	3.98e-08	12.511
Cd37	-3.45533	1.11267	-8.73419	7.62e-10	3.98e-08	12.5556
Sigmar1	1.3972	5.14003	8.73068	7.69e-10	3.99e-08	12.3328
Ckap2	-1.94466	4.19699	-8.72996	7.71e-10	3.99e-08	12.4476
St3gal1	1.60995	5.47719	8.72873	7.73e-10	3.99e-08	12.3112
Mrc1	-2.88812	1.19559	-8.72589	7.79e-10	4.01e-08	12.5354
Adap2	-2.71853	0.464234	-8.72193	7.87e-10	4.03e-08	12.5205
Ehd4	-2.18125	3.43447	-8.72014	7.9e-10	4.04e-08	12.4631
1700094D03Rik	-1.50344	4.2726	-8.7119	8.07e-10	4.11e-08	12.343
Prr36	1.46167	6.23264	8.69896	8.34e-10	4.23e-08	12.2108
Slc15a3	-3.70405	1.59373	-8.68632	8.61e-10	4.35e-08	12.4349
Plekha2	-2.21546	3.59402	-8.68539	8.63e-10	4.35e-08	12.3786
Thrsp	2.02513	3.7362	8.67754	8.81e-10	4.42e-08	12.3485
Dync1i2	0.986161	8.74847	8.67407	8.89e-10	4.45e-08	12.0657
Lipa	-2.46169	3.75325	-8.66033	9.2e-10	4.59e-08	12.2695
Csf3r	-2.46058	-0.0873048	-8.65752	9.27e-10	4.59e-08	12.3574
Prom1	-2.15837	4.03346	-8.65721	9.28e-10	4.59e-08	12.2696
Gstm2	-2.45987	2.98567	-8.6525	9.39e-10	4.63e-08	12.3243
Cped1	-2.77962	1.5774	-8.65175	9.41e-10	4.63e-08	12.3505
Postn	-2.25488	3.39707	-8.63203	9.89e-10	4.85e-08	12.2217
Kdelr3	-2.39538	2.22415	-8.62877	9.98e-10	4.87e-08	12.2832
Ccdc3	-2.5219	3.8429	-8.62248	1.01e-09	4.94e-08	12.1725
Gngt2	-2.91722	0.648124	-8.62035	1.02e-09	4.95e-08	12.271
Col8a2	-2.79489	0.696528	-8.6172	1.03e-09	4.96e-08	12.2629
Rsph1	-2.00818	2.95571	-8.61604	1.03e-09	4.96e-08	12.2097
Blnk	-3.3608	1.73082	-8.61555	1.03e-09	4.96e-08	12.2518
Vgll3	-2.52774	2.88609	-8.60232	1.07e-09	5.11e-08	12.1971
Maats1	-2.55831	2.68218	-8.60036	1.07e-09	5.12e-08	12.1948
Uaca	-2.09573	3.38681	-8.56408	1.18e-09	5.59e-08	12.0835
Gusb	-2.36075	3.47078	-8.56329	1.18e-09	5.59e-08	12.0573
Olfml3	-3.13652	1.94683	-8.55606	1.2e-09	5.68e-08	12.1031
Slc11a1	-3.622	1.8775	-8.55049	1.22e-09	5.74e-08	12.0926
Gucy1a3	1.44476	7.82497	8.54342	1.24e-09	5.83e-08	11.7477
Ms4a6d	-3.51462	1.02423	-8.53414	1.27e-09	5.94e-08	12.0572
Irf5	-2.95412	1.13451	-8.53361	1.27e-09	5.94e-08	12.0558
Il1r1	-2.64571	1.63758	-8.53038	1.28e-09	5.97e-08	12.0478
Iqcg	-2.00673	4.33057	-8.52725	1.29e-09	5.98e-08	11.9076
Cyp39a1	-2.55934	3.52326	-8.52596	1.3e-09	5.98e-08	11.9953
Flt1	-2.87257	0.720709	-8.52372	1.31e-09	5.98e-08	12.0303
Itgb5	-1.87867	6.84836	-8.52366	1.31e-09	5.98e-08	11.7297
Pcolce	-2.8103	2.27302	-8.52332	1.31e-09	5.98e-08	12.0248
Ier2	1.76264	3.47484	8.51544	1.33e-09	6.08e-08	11.9103
Cdc20b	-2.92966	0.7367	-8.51461	1.34e-09	6.08e-08	12.0082
Slc39a12	-1.85217	5.54837	-8.51291	1.34e-09	6.09e-08	11.763
Fam180a	-2.90556	0.513846	-8.50817	1.36e-09	6.14e-08	11.991
Eno4	-2.17326	2.20959	-8.50444	1.37e-09	6.18e-08	11.9664
Wwtr1	-2.05412	5.68838	-8.50299	1.38e-09	6.18e-08	11.7441
Inhba	1.90255	4.16925	8.5003	1.39e-09	6.21e-08	11.8461
Txnrd1	-1.49615	8.39379	-8.49682	1.4e-09	6.24e-08	11.6122
Myo1f	-3.00417	0.464141	-8.49281	1.41e-09	6.29e-08	11.9525
Cgrrf1	-1.74863	3.92278	-8.47879	1.47e-09	6.5e-08	11.8119
BC064078	-2.42624	3.75133	-8.47094	1.5e-09	6.61e-08	11.8232
Apobec1	-2.46858	2.04759	-8.45114	1.58e-09	6.94e-08	11.8358
Igsf21	2.46924	5.65476	8.44398	1.6e-09	7.05e-08	11.5837
Bin2	-2.94164	0.537043	-8.4404	1.62e-09	7.09e-08	11.8209
Prkag2	1.55635	6.43226	8.43197	1.66e-09	7.23e-08	11.4997
Trp53inp1	-1.51845	5.80829	-8.42387	1.69e-09	7.36e-08	11.5269
Kank2	-1.90952	4.2826	-8.4201	1.71e-09	7.41e-08	11.6843
Hvcn1	-2.84095	2.43975	-8.41526	1.73e-09	7.47e-08	11.7493
Adcyap1	3.2562	3.51174	8.41466	1.73e-09	7.47e-08	11.6979
Plcd4	-2.06247	5.83595	-8.39379	1.83e-09	7.84e-08	11.4712
Cfap44	-2.77092	1.57976	-8.39342	1.83e-09	7.84e-08	11.6944
Fcgr1	-3.155	0.643362	-8.3759	1.91e-09	8.18e-08	11.6595
Ror1	-3.25229	1.6206	-8.36886	1.95e-09	8.3e-08	11.6413
Ccl9	-2.68391	1.65043	-8.3679	1.95e-09	8.3e-08	11.6343
Cyth4	-3.3759	1.43756	-8.36593	1.96e-09	8.32e-08	11.63
Gm973	-2.78256	4.43254	-8.35773	2.01e-09	8.46e-08	11.5032
Enpp1	-2.20246	1.50042	-8.35702	2.01e-09	8.46e-08	11.6076
Icam1	-3.05798	1.08827	-8.35325	2.03e-09	8.52e-08	11.602
Tom1l1	-1.61374	5.3456	-8.33504	2.13e-09	8.91e-08	11.3214
Efs	1.593	4.11783	8.33179	2.15e-09	8.96e-08	11.4405
Pdlim2	-2.90655	3.32525	-8.32434	2.19e-09	9.11e-08	11.4879
Plat	-1.21961	7.36654	-8.31916	2.22e-09	9.19e-08	11.1688
Ctla2b	-3.17301	1.11219	-8.31786	2.22e-09	9.19e-08	11.5102
Tmem43	-1.09657	6.99585	-8.31747	2.23e-09	9.19e-08	11.1746
Yap1	-1.45439	5.65883	-8.3099	2.27e-09	9.35e-08	11.224
Pgm5	-3.02124	1.81207	-8.30658	2.29e-09	9.4e-08	11.4788
Wscd2	1.51571	4.84469	8.30464	2.3e-09	9.42e-08	11.2581
Ldlrap1	-3.10703	1.64556	-8.28704	2.41e-09	9.83e-08	11.4297
Cfh	-2.98886	1.99023	-8.28629	2.42e-09	9.83e-08	11.4192
Pacsin2	-1.39423	5.80976	-8.28021	2.45e-09	9.95e-08	11.1465
Wls	-1.3577	6.75355	-8.27942	2.46e-09	9.95e-08	11.0857
Glycam1	-3.79366	2.56877	-8.27631	2.48e-09	1e-07	11.3978
Satb1	1.28327	7.05872	8.27108	2.51e-09	1.01e-07	11.0492
Vtn	-2.33098	2.77861	-8.26921	2.53e-09	1.01e-07	11.3518
Ptrf	-3.79513	4.27354	-8.26774	2.53e-09	1.01e-07	11.3021
Kank4	-2.79991	2.33211	-8.2652	2.55e-09	1.02e-07	11.358
Jph1	1.75427	3.7748	8.26162	2.58e-09	1.02e-07	11.2267
Cdh26	-2.35879	0.725611	-8.26107	2.58e-09	1.02e-07	11.3689
Dnase1l1	-2.63586	1.11206	-8.25927	2.59e-09	1.03e-07	11.3635
Parvg	-2.52019	0.538731	-8.24652	2.68e-09	1.05e-07	11.3323
Pf4	-2.77795	0.771003	-8.24651	2.68e-09	1.05e-07	11.3314
Mpp5	-1.96452	5.47306	-8.245	2.69e-09	1.06e-07	11.0798
Cabp7	2.52916	1.88341	8.24	2.72e-09	1.07e-07	11.3052
Irf8	-3.09114	1.98685	-8.23531	2.76e-09	1.08e-07	11.2919
Actn1	-1.45288	6.85119	-8.2276	2.81e-09	1.1e-07	10.9442
Irgm1	-3.91485	1.40395	-8.22627	2.82e-09	1.1e-07	11.2768
Cbx8	1.2997	4.66262	8.21129	2.94e-09	1.13e-07	11.0604
Arhgap18	-1.81506	4.18039	-8.2107	2.94e-09	1.13e-07	11.0873
Hsd17b7	1.07794	5.6456	8.21034	2.94e-09	1.13e-07	10.9241
Gna15	-3.00068	0.322039	-8.20361	3e-09	1.15e-07	11.2234
Fermt3	-2.56962	0.864465	-8.20082	3.02e-09	1.16e-07	11.2152
Gpr34	-2.71801	0.428265	-8.19875	3.03e-09	1.16e-07	11.2106
Apbb1ip	-2.63219	2.28697	-8.19724	3.05e-09	1.16e-07	11.1726
Prdx6	-2.41935	8.23531	-8.19555	3.06e-09	1.16e-07	10.8359
Rcor2	1.33711	5.30294	8.19179	3.09e-09	1.17e-07	10.9429
Rgs2	1.22206	6.40825	8.19141	3.09e-09	1.17e-07	10.8574
Per1	1.41394	6.12862	8.1913	3.09e-09	1.17e-07	10.8709
Junb	2.27843	5.82174	8.18444	3.15e-09	1.18e-07	10.8548
Gbp2	-3.13547	1.09435	-8.14567	3.49e-09	1.31e-07	11.0726
Rtp4	-3.19383	1.61776	-8.1269	3.66e-09	1.37e-07	11.0145
Gadd45a	-1.80386	4.96669	-8.12427	3.69e-09	1.37e-07	10.7792
Col8a1	-2.59336	2.05865	-8.12403	3.69e-09	1.37e-07	10.9993
Cd68	-3.32105	4.50649	-8.11986	3.73e-09	1.38e-07	10.8648
Tgm2	-2.79978	1.64471	-8.11924	3.74e-09	1.38e-07	11.0071
P2ry1	-2.2336	1.54445	-8.11198	3.81e-09	1.41e-07	10.9847
C1qc	-2.53456	0.441941	-8.11084	3.82e-09	1.41e-07	10.9872
Pdlim5	-2.02631	5.04854	-8.10482	3.88e-09	1.43e-07	10.7696
Bdh1	1.24386	8.02039	8.09925	3.94e-09	1.44e-07	10.5779
Sash3	-2.42626	0.419839	-8.09087	4.03e-09	1.47e-07	10.9363
Hexb	-2.54279	5.89836	-8.08661	4.07e-09	1.48e-07	10.649
Rab32	-2.97346	2.32828	-8.08025	4.14e-09	1.51e-07	10.8912
Pawr	-2.8883	3.28844	-8.07083	4.24e-09	1.54e-07	10.8291
Tfec	-2.26726	0.0874335	-8.06496	4.31e-09	1.56e-07	10.8698
Col1a2	-2.64687	2.7191	-8.06076	4.36e-09	1.57e-07	10.8297
Serpine1	-3.55897	1.88225	-8.05454	4.43e-09	1.59e-07	10.833
Pon3	-3.09688	1.03872	-8.05267	4.45e-09	1.59e-07	10.8376
Nrarp	1.85404	4.56716	8.05264	4.45e-09	1.59e-07	10.6747
Slc24a5	-2.33938	0.0733547	-8.04433	4.55e-09	1.63e-07	10.817
Tor3a	-1.80091	3.48042	-8.04204	4.58e-09	1.63e-07	10.7212
Siglec1	-2.97473	0.123797	-8.04175	4.58e-09	1.63e-07	10.8108
Ect2	-1.41396	4.38332	-8.02581	4.78e-09	1.69e-07	10.5795
Trp53	-1.15346	6.05439	-8.01561	4.91e-09	1.74e-07	10.4216
Usp18	-2.63706	0.27474	-8.01257	4.95e-09	1.75e-07	10.7362
Eif2ak2	-2.11093	2.64805	-8.00659	5.03e-09	1.77e-07	10.6814
Bace2	-1.87628	5.46009	-8.00407	5.06e-09	1.78e-07	10.461
Itga6	-1.42843	7.08029	-7.99416	5.19e-09	1.82e-07	10.3146
Ccdc67	-2.77132	1.82595	-7.98696	5.29e-09	1.85e-07	10.634
Gtf3c4	-1.27018	6.30514	-7.98575	5.31e-09	1.85e-07	10.3338
Srsf11	1.06875	6.52135	7.98315	5.35e-09	1.86e-07	10.3073
Dio2	1.92425	3.41491	7.98043	5.39e-09	1.87e-07	10.5632
Shc1	-2.15814	4.42517	-7.97108	5.52e-09	1.91e-07	10.4912
Tbx18	-2.24151	1.46055	-7.9674	5.58e-09	1.92e-07	10.6158
Enkur	-2.18627	3.41737	-7.96463	5.62e-09	1.93e-07	10.5168
Wdfy4	-2.8706	0.589013	-7.9594	5.69e-09	1.96e-07	10.5992
Abcc12	-2.97372	1.02648	-7.95325	5.79e-09	1.98e-07	10.5791
Igfbp7	-2.76066	3.50119	-7.95304	5.79e-09	1.98e-07	10.5038
Cd84	-2.28088	0.0388658	-7.95027	5.83e-09	1.99e-07	10.5765
Sod3	-2.75976	2.12097	-7.94958	5.84e-09	1.99e-07	10.5544
Plekha7	-1.63347	4.06464	-7.9492	5.85e-09	1.99e-07	10.4325
Pdpn	-1.5924	6.72406	-7.947	5.88e-09	1.99e-07	10.2223
Coro2a	1.58866	5.34588	7.9444	5.92e-09	2e-07	10.2527
Lamb2	-2.15707	5.9007	-7.93489	6.08e-09	2.04e-07	10.256
Man1a	-1.52488	4.5342	-7.93449	6.08e-09	2.04e-07	10.3202
Ccdc153	-2.36163	2.52132	-7.93369	6.1e-09	2.04e-07	10.4681
Wdr63	-2.37777	1.72741	-7.93299	6.11e-09	2.04e-07	10.4987
Col5a3	-2.92962	1.25241	-7.92919	6.17e-09	2.06e-07	10.5173
Cgnl1	-2.6927	2.66522	-7.89748	6.71e-09	2.24e-07	10.4002
Grm8	1.52022	4.09184	7.89589	6.74e-09	2.24e-07	10.2779
Pla2g7	-1.39352	9.35572	-7.89324	6.79e-09	2.25e-07	10.0097
Pstpip1	-2.57563	2.4984	-7.89268	6.8e-09	2.25e-07	10.3891
Fnbp1	-1.14931	7.76815	-7.86524	7.31e-09	2.41e-07	9.95982
Btbd7	-1.31719	5.94316	-7.85904	7.43e-09	2.45e-07	10.0143
Tlr4	-2.62543	0.577728	-7.85287	7.55e-09	2.48e-07	10.3254
Cldn15	-2.18905	0.568093	-7.84694	7.67e-09	2.52e-07	10.3075
Nr1d2	-1.48812	5.79746	-7.8442	7.73e-09	2.53e-07	9.99152
B3gat1	1.25946	8.68006	7.84323	7.75e-09	2.53e-07	9.88008
Arpc1b	-2.67511	3.18018	-7.84035	7.81e-09	2.54e-07	10.2131
Serpinb6b	-2.80953	0.802997	-7.82513	8.13e-09	2.64e-07	10.2513
B4galt1	-2.04838	3.05178	-7.81832	8.28e-09	2.68e-07	10.1669
Spata18	-2.69919	2.16342	-7.81544	8.34e-09	2.7e-07	10.1759
Nrn1	1.83461	5.25421	7.81363	8.38e-09	2.71e-07	9.90742
P2ry6	-2.44345	0.627303	-7.8109	8.44e-09	2.72e-07	10.2172
Il17rc	-2.16637	2.23799	-7.80958	8.47e-09	2.72e-07	10.1805
Tpp1	-1.33896	6.22816	-7.78161	9.13e-09	2.93e-07	9.79224
Plppr1	1.33129	7.18215	7.7709	9.39e-09	3.01e-07	9.71109
1700012B09Rik	-2.52473	1.10788	-7.76133	9.64e-09	3.08e-07	10.0719
Lpxn	-2.77641	0.506277	-7.75613	9.77e-09	3.11e-07	10.073
Pik3cg	-2.24149	0.529435	-7.75232	9.87e-09	3.14e-07	10.0659
Ucma	-2.67387	1.60259	-7.74928	9.95e-09	3.16e-07	10.0418
Stard5	-1.39554	4.55872	-7.73562	1.03e-08	3.27e-07	9.81533
Tlr13	-3.02399	1.40398	-7.70964	1.11e-08	3.49e-07	9.94514
Ecm1	-2.58705	2.56392	-7.70601	1.12e-08	3.52e-07	9.8935
Grm3	1.89587	5.19824	7.69169	1.16e-08	3.65e-07	9.60084
Igfbp2	-1.99208	8.28791	-7.68293	1.19e-08	3.73e-07	9.45596
Cd48	-2.23373	-0.0169816	-7.68046	1.2e-08	3.74e-07	9.88004
Pipox	-1.85599	3.95777	-7.67625	1.21e-08	3.78e-07	9.72394
Folr2	-2.65406	0.474471	-7.67493	1.21e-08	3.78e-07	9.86345
Neurod6	2.0477	5.23419	7.67421	1.22e-08	3.78e-07	9.54747
Fut9	1.33031	6.06121	7.67052	1.23e-08	3.81e-07	9.49412
Depdc7	-2.1468	1.42946	-7.662	1.26e-08	3.89e-07	9.8253
Cd28	-2.64696	0.642946	-7.65873	1.27e-08	3.92e-07	9.81791
Nxph3	2.42734	4.28824	7.65314	1.29e-08	3.97e-07	9.61481
Wdr38	-2.12277	1.04535	-7.65106	1.29e-08	3.98e-07	9.80189
Mob3a	1.33405	6.25336	7.64589	1.31e-08	4.03e-07	9.41255
Il21r	-2.68916	0.285663	-7.64285	1.32e-08	4.05e-07	9.781
Eaf1	-1.10872	4.88455	-7.64268	1.32e-08	4.05e-07	9.50232
Cyp51	1.23767	6.97453	7.63485	1.35e-08	4.12e-07	9.34194
Cd14	-2.9402	1.11878	-7.63474	1.35e-08	4.12e-07	9.74914
0610007P14Rik	1.23888	6.70647	7.63324	1.36e-08	4.12e-07	9.35467
Slc6a11	1.19723	8.03533	7.63161	1.36e-08	4.13e-07	9.32396
Mvp	-2.76478	1.32176	-7.63112	1.37e-08	4.13e-07	9.74415
Slc12a7	-1.9092	4.39973	-7.62977	1.37e-08	4.14e-07	9.56814
Tspo	-2.75956	1.89961	-7.62824	1.38e-08	4.14e-07	9.71222
Pros1	-2.36823	2.66823	-7.62713	1.38e-08	4.15e-07	9.68149
Slco2b1	-2.7632	0.9918	-7.61942	1.41e-08	4.23e-07	9.71615
Ddr1	-1.26059	6.7681	-7.61616	1.42e-08	4.25e-07	9.31938
Col4a5	-2.25833	3.48438	-7.61092	1.44e-08	4.3e-07	9.59141
Nek7	-1.27209	5.10381	-7.60971	1.45e-08	4.31e-07	9.42387
Zfp74	1.4838	4.06875	7.60818	1.45e-08	4.32e-07	9.55244
Itgal	-2.61099	0.202354	-7.59773	1.49e-08	4.43e-07	9.66352
Golm1	-1.19454	5.44038	-7.58997	1.53e-08	4.52e-07	9.32769
Erap1	-2.14844	3.95341	-7.58151	1.56e-08	4.61e-07	9.48205
Iqub	-2.35565	1.47669	-7.57465	1.59e-08	4.69e-07	9.58671
Ccdc60	-2.36223	1.82013	-7.57395	1.59e-08	4.69e-07	9.5724
Tox	1.18679	5.82654	7.5682	1.62e-08	4.75e-07	9.22257
Ubn1	-1.01147	5.40197	-7.56507	1.63e-08	4.78e-07	9.2565
Evi5	-1.27485	5.96822	-7.56072	1.65e-08	4.83e-07	9.20751
Cdk8	1.1239	6.51617	7.55873	1.66e-08	4.84e-07	9.16471
Elavl3	1.10133	6.68605	7.55687	1.67e-08	4.86e-07	9.1582
Car3	-2.3984	2.30342	-7.55526	1.67e-08	4.87e-07	9.53111
Cdk6	-1.80724	3.48396	-7.54248	1.73e-08	5.03e-07	9.3788
Prox1	-1.33508	4.73864	-7.53321	1.78e-08	5.15e-07	9.2488
Mtmr3	-1.0976	6.38668	-7.53187	1.78e-08	5.15e-07	9.10388
Ccdc108	-1.86432	1.55448	-7.53151	1.79e-08	5.15e-07	9.45286
Pard3b	-2.04158	3.90287	-7.52981	1.79e-08	5.16e-07	9.34133
Slco1a5	-2.98918	0.944202	-7.52712	1.81e-08	5.19e-07	9.4727
Tapbp	-1.76164	6.60225	-7.514	1.87e-08	5.37e-07	9.05781
Slc39a4	-2.59948	0.862905	-7.50394	1.92e-08	5.5e-07	9.41538
Pmp22	-1.31181	6.62586	-7.50169	1.93e-08	5.52e-07	9.00017
Msrb3	-2.65335	2.59975	-7.49596	1.96e-08	5.6e-07	9.33351
Mpp1	-1.34274	4.8579	-7.49494	1.97e-08	5.6e-07	9.09304
Sft2d2	-1.65223	5.67817	-7.48896	2e-08	5.68e-07	9.07209
Spef2	-2.34415	1.84764	-7.48787	2.01e-08	5.69e-07	9.33908
Tmem47	-1.55909	8.00748	-7.47951	2.05e-08	5.81e-07	8.9155
Rdh10	-1.28996	4.99579	-7.47849	2.06e-08	5.81e-07	9.04988
Rbm47	-2.91048	0.735337	-7.46297	2.15e-08	6.04e-07	9.30517
Kif23	-1.53422	4.06708	-7.4628	2.15e-08	6.04e-07	9.11795
Bckdha	-1.08425	6.27361	-7.45956	2.17e-08	6.08e-07	8.92835
Ccng1	-1.00999	7.40358	-7.45698	2.18e-08	6.11e-07	8.85649
Sfrp2	1.55317	4.2134	7.45185	2.21e-08	6.18e-07	9.07347
Galnt6	-2.46216	0.592917	-7.45161	2.22e-08	6.18e-07	9.27005
Arsi	-2.5746	1.49716	-7.44361	2.26e-08	6.3e-07	9.24355
Slit1	1.01575	6.23354	7.4432	2.27e-08	6.3e-07	8.86192
Tfdp2	-1.71047	4.40632	-7.44049	2.28e-08	6.33e-07	9.0282
Fam13a	-1.77681	4.22132	-7.43261	2.33e-08	6.45e-07	8.98338
Lmx1a	-2.173	1.15826	-7.42995	2.35e-08	6.49e-07	9.21997
Slc16a4	-2.66239	1.92084	-7.41014	2.48e-08	6.83e-07	9.14138
Igf1	-2.46201	4.3044	-7.4047	2.52e-08	6.92e-07	8.95095
Tspan15	-1.88965	5.19241	-7.40089	2.54e-08	6.98e-07	8.87078
Nabp1	1.45976	3.7536	7.39545	2.58e-08	7.07e-07	8.95715
Lpar1	-1.36862	4.97463	-7.3922	2.6e-08	7.11e-07	8.83992
Zc3hav1	-2.66046	1.56019	-7.39189	2.6e-08	7.11e-07	9.1047
Ncf2	-3.22701	1.49653	-7.38473	2.66e-08	7.24e-07	9.08152
Rab33a	1.43705	6.53322	7.38196	2.68e-08	7.28e-07	8.67779
Lrrc25	-2.41364	0.49912	-7.37997	2.69e-08	7.3e-07	9.09162
Fkbp9	-1.76626	6.66821	-7.37775	2.71e-08	7.33e-07	8.68396
Garnl3	1.14131	6.21332	7.37294	2.74e-08	7.41e-07	8.67184
Wnt5a	-1.70746	4.45607	-7.36855	2.77e-08	7.49e-07	8.83705
Vegfd	2.3551	2.78395	7.36102	2.83e-08	7.63e-07	8.95516
Anxa2	-2.48764	5.06639	-7.35941	2.84e-08	7.65e-07	8.80716
Col5a2	-2.70835	3.74011	-7.35641	2.87e-08	7.7e-07	8.89494
St14	-2.12622	1.03308	-7.35425	2.88e-08	7.73e-07	9.01993
Nacc2	-1.40697	7.4633	-7.35261	2.9e-08	7.75e-07	8.58347
Clec5a	-2.1962	-0.311278	-7.35122	2.91e-08	7.76e-07	9.01844
Gad1	-0.938678	8.48411	-7.33908	3.01e-08	8.01e-07	8.5229
Slc37a2	-2.5106	1.27614	-7.33753	3.02e-08	8.03e-07	8.96192
Glb1l2	-2.27695	2.15668	-7.3327	3.06e-08	8.12e-07	8.92929
Pygo1	1.36212	5.03691	7.33179	3.07e-08	8.12e-07	8.69932
Rln1	-2.26456	2.34952	-7.32523	3.12e-08	8.25e-07	8.91859
Zfp518a	1.31745	3.78753	7.32343	3.14e-08	8.28e-07	8.7981
Fmnl3	-1.60111	3.49825	-7.32219	3.15e-08	8.29e-07	8.82333
Fam167a	-1.15176	4.99942	-7.31805	3.18e-08	8.37e-07	8.62986
Ptprc	-2.73137	0.60115	-7.31228	3.23e-08	8.47e-07	8.90962
Ncam2	1.32131	6.87827	7.31213	3.23e-08	8.47e-07	8.47459
Odf3b	-2.14963	1.9283	-7.31154	3.24e-08	8.47e-07	8.86402
Scd1	1.2063	8.97399	7.30851	3.27e-08	8.52e-07	8.4275
Srgn	-2.38249	0.867206	-7.30836	3.27e-08	8.52e-07	8.90002
Hs3st4	1.83701	4.43122	7.29449	3.39e-08	8.81e-07	8.57607
Col4a4	-2.43436	1.20663	-7.2936	3.4e-08	8.81e-07	8.85857
Srxn1	-2.4712	4.74286	-7.29347	3.4e-08	8.81e-07	8.65367
Nefm	1.77132	6.04276	7.29318	3.41e-08	8.81e-07	8.46437
Aldh3b1	-2.54426	2.57057	-7.29239	3.41e-08	8.81e-07	8.79234
Fezf2	2.38282	4.95776	7.29214	3.41e-08	8.81e-07	8.54921
Gm20743	-2.22446	3.37889	-7.29117	3.42e-08	8.81e-07	8.75135
1810011H11Rik	-2.42306	0.0758872	-7.2893	3.44e-08	8.84e-07	8.85227
Zfp26	1.18331	5.11954	7.28773	3.46e-08	8.86e-07	8.56429
Ahnak	-4.14494	5.03808	-7.28164	3.51e-08	9e-07	8.638
Decr1	-1.1329	5.56801	-7.27954	3.53e-08	9.03e-07	8.47894
Egr3	1.63201	5.17022	7.27722	3.56e-08	9.07e-07	8.46995
Crebrf	-1.65522	4.09695	-7.26934	3.63e-08	9.25e-07	8.58061
Ms4a14	-1.9646	-0.328267	-7.25332	3.8e-08	9.64e-07	8.76091
Slc13a5	1.64721	1.62372	7.25266	3.8e-08	9.64e-07	8.71325
Xdh	-2.01577	-0.184633	-7.25186	3.81e-08	9.64e-07	8.75678
Nkrf	1.41497	4.65498	7.2512	3.82e-08	9.64e-07	8.4689
Mamdc2	-2.32344	2.48344	-7.25006	3.83e-08	9.64e-07	8.67686
Klhl21	-1.63223	4.3959	-7.24984	3.83e-08	9.64e-07	8.50193
Tnfrsf9	-2.27592	-0.0871252	-7.24983	3.83e-08	9.64e-07	8.74951
Pifo	-2.20354	1.79526	-7.24729	3.86e-08	9.69e-07	8.69125
Tbxas1	-2.68473	0.739396	-7.2457	3.88e-08	9.71e-07	8.73101
Clu	-1.25098	10.0751	-7.24213	3.91e-08	9.79e-07	8.23823
Tcn2	-1.30673	5.73044	-7.23742	3.96e-08	9.9e-07	8.34299
Hnrnph1	1.01628	8.44051	7.23182	4.03e-08	1e-06	8.22272
Dhcr7	1.20175	7.81931	7.23062	4.04e-08	1e-06	8.2265
Gpc4	-2.56782	3.62271	-7.23026	4.04e-08	1e-06	8.51089
Slc2a4	-1.80109	2.79874	-7.22791	4.07e-08	1.01e-06	8.6228
Tmem230	1.24661	5.64519	7.2081	4.29e-08	1.06e-06	8.26708
Ifi204	-1.95416	-0.302463	-7.20263	4.36e-08	1.08e-06	8.62666
Cldn10	1.81818	4.39592	7.19885	4.4e-08	1.09e-06	8.37688
Irf1	-2.35739	3.5841	-7.19754	4.42e-08	1.09e-06	8.45151
Ifit1	-2.87575	0.692729	-7.18977	4.52e-08	1.11e-06	8.58362
Has3	1.44456	3.8526	7.18388	4.59e-08	1.13e-06	8.35079
Efna2	1.31824	4.61692	7.18156	4.62e-08	1.13e-06	8.29318
Fam214a	-1.33454	4.98093	-7.17973	4.64e-08	1.14e-06	8.25427
Hacd4	-1.99923	3.88273	-7.17572	4.69e-08	1.15e-06	8.36462
Gbp7	-2.25651	2.60209	-7.16876	4.78e-08	1.17e-06	8.45415
Parva	-1.47834	6.88308	-7.16177	4.88e-08	1.19e-06	8.08018
Synpo2	-2.4013	4.43042	-7.15958	4.9e-08	1.19e-06	8.29825
Islr	-2.05369	3.55541	-7.15696	4.94e-08	1.2e-06	8.37135
Dnaaf3	-2.63137	1.12176	-7.15675	4.94e-08	1.2e-06	8.48417
Cgn	1.74229	3.14478	7.15417	4.98e-08	1.2e-06	8.38954
3632451O06Rik	1.39436	5.02176	7.14696	5.08e-08	1.23e-06	8.12933
Cd36	-1.91311	1.66807	-7.14157	5.15e-08	1.24e-06	8.4244
Nfkb2	-1.76262	3.62137	-7.13808	5.2e-08	1.25e-06	8.29319
Jam2	-1.37036	7.23556	-7.13161	5.29e-08	1.27e-06	7.98203
Nid2	-2.89333	3.78779	-7.12581	5.38e-08	1.29e-06	8.29785
Bach1	-1.14349	5.58128	-7.12464	5.4e-08	1.29e-06	8.03741
Serpinb8	-2.58955	0.586977	-7.11931	5.48e-08	1.31e-06	8.39919
Tep1	-2.57531	1.67852	-7.1135	5.56e-08	1.33e-06	8.35385
Slco1a4	-2.58952	0.37105	-7.11227	5.58e-08	1.33e-06	8.38151
Rasgrp3	-2.68198	0.688755	-7.11043	5.61e-08	1.33e-06	8.36849
Asic1	1.40618	6.33364	7.10205	5.74e-08	1.36e-06	7.93657
Hectd2	1.06902	5.11682	7.09556	5.85e-08	1.39e-06	7.98756
Dnajb13	-2.65859	2.23785	-7.09421	5.87e-08	1.39e-06	8.24718
Mal	-2.36101	1.20238	-7.09314	5.88e-08	1.39e-06	8.31207
Slc2a2	-1.93935	-0.176146	-7.08964	5.94e-08	1.4e-06	8.32486
Ms4a4a	-3.40174	1.24013	-7.08911	5.95e-08	1.4e-06	8.28354
Gfra2	1.42972	4.68801	7.07975	6.1e-08	1.43e-06	7.97229
Basp1	1.1231	10.5849	7.07816	6.13e-08	1.44e-06	7.78059
Tnrc6c	0.91653	7.07048	7.07081	6.26e-08	1.47e-06	7.8134
Cnppd1	-0.911214	6.47574	-7.06832	6.3e-08	1.47e-06	7.83135
Npr3	2.05481	4.45432	7.06405	6.37e-08	1.49e-06	7.96815
Gpr17	1.51071	6.04275	7.04445	6.73e-08	1.57e-06	7.81602
Myo10	-1.89263	2.45575	-7.04043	6.8e-08	1.58e-06	8.09625
Rbpms	-2.16983	2.05538	-7.03952	6.82e-08	1.58e-06	8.13231
Gm867	-2.27223	1.61365	-7.03158	6.97e-08	1.62e-06	8.11289
Limd2	1.19464	6.06269	7.03121	6.98e-08	1.62e-06	7.74495
Lrrc48	-1.7985	2.89522	-7.02954	7.01e-08	1.62e-06	8.04594
Ccdc190	-1.7541	5.24444	-7.02135	7.17e-08	1.66e-06	7.84044
Slc29a2	0.952947	4.71194	7.00799	7.44e-08	1.71e-06	7.78195
Mobp	-2.76727	1.72246	-7.00362	7.53e-08	1.73e-06	7.99522
Tmem108	1.06341	6.15238	7.0014	7.57e-08	1.74e-06	7.64793
Acox2	-2.26704	0.777757	-6.99827	7.64e-08	1.75e-06	8.07352
Anxa1	-2.7216	1.53968	-6.99393	7.73e-08	1.77e-06	8.04151
Itih2	-2.3958	1.17621	-6.99279	7.75e-08	1.77e-06	8.05026
Nptx1	1.86391	5.11998	6.98538	7.91e-08	1.81e-06	7.69744
Afap1l2	-1.30934	4.97737	-6.98341	7.96e-08	1.81e-06	7.74011
Gclm	-1.27366	7.0167	-6.98331	7.96e-08	1.81e-06	7.56647
Nyap1	1.59643	6.55981	6.98144	8e-08	1.82e-06	7.59609
Klhl6	-2.67658	0.427239	-6.97391	8.17e-08	1.85e-06	8.00792
Ltbr	-1.61749	4.11991	-6.97273	8.2e-08	1.86e-06	7.78954
Rem2	1.73166	4.02858	6.97213	8.21e-08	1.86e-06	7.78629
Anpep	-2.29209	0.542783	-6.97121	8.23e-08	1.86e-06	8.00533
Bcl9	1.16389	6.66548	6.96517	8.37e-08	1.89e-06	7.54023
Aldh1a2	-2.21229	0.860866	-6.96378	8.4e-08	1.89e-06	7.98486
Mapre2	1.63631	7.24916	6.95751	8.55e-08	1.92e-06	7.48954
Lrrc74b	-2.43288	2.26734	-6.95344	8.64e-08	1.94e-06	7.89184
Frmd8	-1.41716	4.39362	-6.94732	8.79e-08	1.97e-06	7.69498
Gpr37	1.64549	3.5404	6.94535	8.84e-08	1.98e-06	7.76899
Kcnv1	1.54004	5.93261	6.94409	8.87e-08	1.98e-06	7.49353
Zdhhc8	1.04024	6.10009	6.94326	8.89e-08	1.98e-06	7.49681
Dapp1	-1.83276	3.7068	-6.94028	8.96e-08	2e-06	7.76995
Kcne1l	-2.24085	3.89386	-6.92798	9.27e-08	2.06e-06	7.7001
Pter	-1.82591	2.89114	-6.92771	9.28e-08	2.06e-06	7.78345
Man2b1	-1.31572	4.80201	-6.92154	9.44e-08	2.09e-06	7.5426
Prdm16	-1.94094	4.673	-6.92062	9.46e-08	2.09e-06	7.65644
Nfam1	-2.36806	0.255081	-6.91912	9.5e-08	2.09e-06	7.86521
Rbms2	-1.12347	4.85364	-6.91889	9.51e-08	2.09e-06	7.55096
Parp9	-2.03829	2.61171	-6.91883	9.51e-08	2.09e-06	7.77618
Arhgap30	-2.70703	0.601544	-6.91859	9.52e-08	2.09e-06	7.85864
6330416G13Rik	-1.45898	3.65658	-6.90347	9.92e-08	2.18e-06	7.63136
Nhp2	0.827157	6.49872	6.89639	1.01e-07	2.22e-06	7.34532
Kcnt2	1.6125	3.35263	6.89608	1.01e-07	2.22e-06	7.59495
Plekhg3	-2.1927	1.90671	-6.89371	1.02e-07	2.23e-06	7.76846
Ankrd66	-2.23968	1.27443	-6.88921	1.03e-07	2.25e-06	7.76407
Ephb4	-1.88442	2.69167	-6.88863	1.03e-07	2.25e-06	7.7106
Cflar	-2.58684	2.59679	-6.88576	1.04e-07	2.27e-06	7.69671
Tppp	1.30813	6.4867	6.87998	1.06e-07	2.3e-06	7.2986
Cyp26b1	1.49262	4.66361	6.87453	1.07e-07	2.33e-06	7.39697
Tmem163	1.31521	5.04272	6.8704	1.09e-07	2.35e-06	7.36116
Daam2	-1.62714	5.80653	-6.87024	1.09e-07	2.35e-06	7.32766
Cutal	-2.21526	0.425855	-6.86483	1.1e-07	2.38e-06	7.71947
Car2	1.04217	5.06129	6.86068	1.12e-07	2.41e-06	7.3781
Saxo2	-1.89213	1.13132	-6.85674	1.13e-07	2.43e-06	7.66871
Tox3	-0.999528	5.98134	-6.85523	1.13e-07	2.43e-06	7.27603
Gstt1	-2.21529	2.45366	-6.8549	1.13e-07	2.43e-06	7.63056
Aldh9a1	2.02548	4.68766	6.85425	1.14e-07	2.43e-06	7.42618
Il4ra	-1.79899	2.47823	-6.85414	1.14e-07	2.43e-06	7.59951
Mtf1	-1.34728	4.4206	-6.84796	1.16e-07	2.47e-06	7.38067
2310022B05Rik	1.35794	7.99622	6.84324	1.17e-07	2.5e-06	7.16399
Arhgap27	-1.87571	0.47785	-6.83938	1.18e-07	2.52e-06	7.64562
Capsl	-1.74309	1.96211	-6.8379	1.19e-07	2.53e-06	7.56954
Tapbpl	-1.86521	2.55283	-6.83762	1.19e-07	2.53e-06	7.55193
Bmpr1a	-1.10473	6.57563	-6.83129	1.21e-07	2.57e-06	7.17337
Map3k3	-1.23117	4.66815	-6.82926	1.22e-07	2.58e-06	7.32412
Trim56	-2.39566	1.34907	-6.82523	1.23e-07	2.61e-06	7.59346
Prss35	2.13394	2.35443	6.81859	1.26e-07	2.65e-06	7.492
Adam11	1.26816	4.80427	6.813	1.27e-07	2.69e-06	7.20928
Acyp2	1.15308	5.27672	6.81081	1.28e-07	2.7e-06	7.19147
Gab1	-1.38263	6.01935	-6.80664	1.3e-07	2.73e-06	7.14619
Plxdc2	-1.02547	6.62122	-6.80561	1.3e-07	2.73e-06	7.08764
Igfbp3	-1.6518	6.64795	-6.804	1.31e-07	2.74e-06	7.08953
6430411K18Rik	2.16822	2.88977	6.79863	1.33e-07	2.78e-06	7.38733
Htr6	1.65209	2.30375	6.79483	1.34e-07	2.8e-06	7.46379
Fnip1	-1.35514	6.00459	-6.79401	1.34e-07	2.8e-06	7.10049
Gpr26	1.17211	6.63165	6.79373	1.34e-07	2.8e-06	7.05643
Litaf	-1.69192	4.3081	-6.7892	1.36e-07	2.83e-06	7.2116
Grik1	-1.27966	4.38881	-6.78756	1.37e-07	2.84e-06	7.23614
Igfbp5	-1.60589	9.68936	-6.78597	1.37e-07	2.85e-06	6.98098
Efhd1	1.44612	3.94299	6.78579	1.37e-07	2.85e-06	7.30518
Baalc	1.07727	6.43994	6.7736	1.42e-07	2.94e-06	7.01078
Mpeg1	-2.389	1.23646	-6.77302	1.42e-07	2.94e-06	7.44179
Col6a1	-1.64185	4.44078	-6.77126	1.43e-07	2.95e-06	7.23188
Ptgds	-1.78041	4.98971	-6.76923	1.44e-07	2.97e-06	7.15375
H2-D1	-1.44659	5.73121	-6.76776	1.45e-07	2.97e-06	7.02202
Plce1	-1.94633	4.59579	-6.76497	1.46e-07	2.99e-06	7.16384
Kdr	-2.61559	2.39062	-6.76483	1.46e-07	2.99e-06	7.36977
H1f0	1.08505	6.61812	6.75901	1.48e-07	3.03e-06	6.97079
Bmp2k	-1.34322	5.16856	-6.75866	1.48e-07	3.03e-06	7.04714
Tfcp2l1	-2.49503	3.21347	-6.75861	1.48e-07	3.03e-06	7.31904
Selplg	-2.25001	0.296905	-6.75451	1.5e-07	3.06e-06	7.41649
Epsti1	-2.13552	0.254505	-6.74603	1.54e-07	3.13e-06	7.39778
Smagp	-1.97913	0.00264725	-6.74499	1.54e-07	3.13e-06	7.39924
Gtse1	-1.28112	4.09435	-6.74192	1.55e-07	3.15e-06	7.13879
Naip5	-2.09012	0.0201107	-6.7402	1.56e-07	3.17e-06	7.38727
Cdc42bpg	-2.20036	4.2194	-6.7364	1.58e-07	3.19e-06	7.17745
Emilin1	-2.07785	2.08372	-6.73608	1.58e-07	3.19e-06	7.31126
Pnpla3	1.72543	2.46189	6.73435	1.59e-07	3.2e-06	7.27186
Kif9	-1.30219	3.9119	-6.73363	1.59e-07	3.21e-06	7.11383
Stard4	1.30675	5.68452	6.73186	1.6e-07	3.22e-06	6.89928
Armc3	-2.07824	1.96179	-6.72583	1.62e-07	3.27e-06	7.28056
Bysl	1.10461	5.99381	6.72471	1.63e-07	3.27e-06	6.89979
Bcl11b	1.4461	6.14245	6.72229	1.64e-07	3.29e-06	6.91029
Elmo1	0.94816	7.58503	6.72163	1.64e-07	3.29e-06	6.82589
Pmvk	1.14067	6.52227	6.7205	1.65e-07	3.3e-06	6.84791
Sgms1	-1.07308	5.39236	-6.71671	1.67e-07	3.33e-06	6.91619
S1pr3	-3.13601	4.15376	-6.71518	1.67e-07	3.34e-06	7.14776
Osmr	-2.98209	3.09389	-6.71306	1.68e-07	3.35e-06	7.19285
Mmaa	1.2734	3.6831	6.71162	1.69e-07	3.36e-06	7.11015
1700007G11Rik	-2.26822	1.79161	-6.70514	1.72e-07	3.42e-06	7.20802
Luzp2	1.26969	7.54212	6.70273	1.73e-07	3.44e-06	6.77683
Slc7a10	1.91087	2.36874	6.70184	1.74e-07	3.44e-06	7.18664
Cd200r1	-2.06842	-0.242809	-6.70112	1.74e-07	3.44e-06	7.28053
Avpr1a	1.44684	3.38949	6.70094	1.74e-07	3.44e-06	7.07356
Arhgap11a	-1.09964	4.99626	-6.6974	1.76e-07	3.47e-06	6.89417
Lbh	1.12032	6.06285	6.69271	1.78e-07	3.51e-06	6.83838
Nol4l	0.944645	6.9864	6.68674	1.81e-07	3.56e-06	6.74313
Col4a6	-2.68375	2.0817	-6.68662	1.81e-07	3.56e-06	7.18615
Flnb	-1.87655	5.58517	-6.68613	1.81e-07	3.56e-06	6.85193
Grik3	0.932215	7.04828	6.68462	1.82e-07	3.57e-06	6.74187
Lrrtm3	1.67866	5.38402	6.68191	1.84e-07	3.58e-06	6.81772
Rcn3	-1.61173	3.83927	-6.68165	1.84e-07	3.58e-06	7.00432
Cfap161	-2.10315	1.82948	-6.68162	1.84e-07	3.58e-06	7.13674
Kcna4	1.47864	4.115	6.67393	1.88e-07	3.66e-06	6.91944
Ecm2	-2.58932	2.06406	-6.67187	1.89e-07	3.67e-06	7.14698
Fndc4	0.952568	6.25296	6.66178	1.94e-07	3.77e-06	6.71229
Prokr2	1.12704	5.61106	6.65554	1.97e-07	3.83e-06	6.75524
Ptgr1	-1.94426	2.54042	-6.65063	2e-07	3.88e-06	7.04081
Fam43b	1.63742	3.52259	6.64856	2.01e-07	3.9e-06	6.93962
Fcgrt	-1.84958	3.54545	-6.64787	2.02e-07	3.9e-06	7.02753
Slc25a29	1.38622	3.79496	6.64677	2.02e-07	3.91e-06	6.93705
Clec12a	-2.30274	0.482973	-6.64512	2.03e-07	3.92e-06	7.117
Iqgap1	-1.24678	5.2101	-6.64074	2.06e-07	3.96e-06	6.74033
Cd200r4	-2.12761	0.013406	-6.6344	2.09e-07	4.03e-06	7.09955
Plekha4	-2.22914	2.04864	-6.63411	2.1e-07	4.03e-06	7.06561
Lrrc51	-1.38606	3.5904	-6.63084	2.12e-07	4.06e-06	6.87398
Snx20	-2.54651	0.136573	-6.62872	2.13e-07	4.08e-06	7.07937
Stk17b	-1.79998	3.39426	-6.62806	2.13e-07	4.08e-06	6.89932
Fads2	0.73911	9.83045	6.62693	2.14e-07	4.09e-06	6.52977
Myb	-1.62451	3.12964	-6.61669	2.2e-07	4.2e-06	6.87437
Gm17455	-2.23257	3.26791	-6.61316	2.22e-07	4.23e-06	6.88148
Angpt2	-2.11454	0.675802	-6.61224	2.23e-07	4.24e-06	7.03108
Chst3	1.80138	2.69493	6.61173	2.23e-07	4.24e-06	6.958
Gucy1b3	1.34442	7.76951	6.60706	2.26e-07	4.29e-06	6.50089
Nek5	-2.24368	1.85233	-6.60415	2.28e-07	4.32e-06	6.96139
Osbpl1a	0.997417	7.00512	6.60074	2.3e-07	4.35e-06	6.49734
Slamf9	-2.75467	0.07185	-6.59857	2.32e-07	4.37e-06	6.99474
Zfp37	1.07962	4.80965	6.59839	2.32e-07	4.37e-06	6.68832
C230072F16Rik	-2.5066	2.05001	-6.59494	2.34e-07	4.41e-06	6.89463
Ctnna1	-1.46171	6.95962	-6.59185	2.36e-07	4.44e-06	6.48621
Gcnt1	-2.23739	1.76374	-6.5884	2.38e-07	4.47e-06	6.89361
Unc13c	1.91026	2.1911	6.58822	2.38e-07	4.47e-06	6.9021
Cdc42ep2	1.21247	4.21781	6.58672	2.39e-07	4.49e-06	6.69482
Casp1	-2.13141	0.860741	-6.58304	2.42e-07	4.53e-06	6.94234
Iqgap2	-1.93302	4.606	-6.58237	2.42e-07	4.53e-06	6.64313
Lrrc3	1.24646	5.10501	6.58141	2.43e-07	4.54e-06	6.57758
Kank1	-1.29194	5.57431	-6.5781	2.45e-07	4.57e-06	6.51255
Itpripl2	-1.85067	2.61801	-6.57608	2.47e-07	4.59e-06	6.84712
Slc25a18	-1.1465	6.01305	-6.57458	2.48e-07	4.61e-06	6.4788
Tnfrsf12a	-1.99127	3.57689	-6.57216	2.49e-07	4.63e-06	6.68671
Wdr78	-1.84261	2.74097	-6.57103	2.5e-07	4.64e-06	6.77204
Tra2a	0.821821	7.02063	6.56823	2.52e-07	4.67e-06	6.40867
Havcr2	-2.25193	-0.115195	-6.56188	2.57e-07	4.75e-06	6.9012
Kif6	-2.01212	2.0399	-6.54736	2.67e-07	4.94e-06	6.79005
Igsf6	-2.33029	-0.0650523	-6.54514	2.69e-07	4.96e-06	6.85549
Serpinb5	-1.93386	0.931613	-6.53984	2.73e-07	5.03e-06	6.83226
Lama5	-2.5882	3.80675	-6.53725	2.75e-07	5.06e-06	6.61361
Tlr2	-2.03074	-0.0611183	-6.53481	2.77e-07	5.09e-06	6.83004
Gpr157	-1.96675	2.31589	-6.53455	2.77e-07	5.09e-06	6.71225
Ttc21a	-2.67126	1.3792	-6.53383	2.77e-07	5.09e-06	6.78573
Dynlrb1	0.952018	7.59654	6.53182	2.79e-07	5.11e-06	6.29207
Mrgprb1	2.29119	1.71733	6.52793	2.82e-07	5.16e-06	6.7498
Snx10	-1.30382	3.59064	-6.52601	2.84e-07	5.18e-06	6.58328
Stom	-1.41347	6.60053	-6.52599	2.84e-07	5.18e-06	6.33706
Magel2	2.11418	2.34525	6.5244	2.85e-07	5.19e-06	6.71138
Nkiras1	0.927651	5.53697	6.52169	2.87e-07	5.23e-06	6.34093
Efhb	-2.22918	1.18745	-6.52102	2.88e-07	5.23e-06	6.75582
Clns1a	0.921371	7.42087	6.51952	2.89e-07	5.24e-06	6.26529
Runx1t1	0.914792	6.71893	6.51756	2.9e-07	5.26e-06	6.28851
Ddx58	-2.44226	1.75553	-6.51754	2.9e-07	5.26e-06	6.73189
Tmc7	1.03838	4.48106	6.5164	2.91e-07	5.27e-06	6.47081
Cfp	-2.00411	2.08383	-6.51081	2.96e-07	5.34e-06	6.67713
Il10rb	-2.02284	3.1885	-6.51065	2.96e-07	5.34e-06	6.57119
Rfx2	-1.85011	3.54442	-6.51	2.97e-07	5.34e-06	6.62134
Them6	1.58467	3.3438	6.50966	2.97e-07	5.34e-06	6.55308
Stxbp4	-1.37501	4.41251	-6.50937	2.97e-07	5.34e-06	6.46435
Srsf10	0.775279	6.76456	6.50799	2.98e-07	5.36e-06	6.25062
Fgfr1	-0.919986	7.38261	-6.50585	3e-07	5.38e-06	6.23155
Gcat	1.32685	3.69078	6.50094	3.04e-07	5.45e-06	6.4869
Grm2	1.4856	4.08418	6.4946	3.1e-07	5.54e-06	6.4986
Cops7b	0.876197	5.9847	6.4938	3.1e-07	5.54e-06	6.24961
Igtp	-3.02009	1.15927	-6.49334	3.11e-07	5.55e-06	6.68135
Cend1	1.16693	7.78969	6.4916	3.12e-07	5.57e-06	6.18016
Tmem87b	-1.80888	0.721405	-6.48982	3.14e-07	5.59e-06	6.67914
Jakmip3	1.55029	2.74633	6.48646	3.17e-07	5.63e-06	6.57113
Pnma2	1.08678	4.66368	6.48576	3.17e-07	5.64e-06	6.33486
Ak7	-1.68159	2.07813	-6.47862	3.24e-07	5.74e-06	6.56263
Srf	1.09973	5.36935	6.47759	3.25e-07	5.75e-06	6.24297
Vamp8	-1.90068	3.21634	-6.46401	3.37e-07	5.97e-06	6.49794
Zfp810	1.67563	2.88425	6.4585	3.43e-07	6.05e-06	6.51468
Ifih1	-2.15178	1.50121	-6.45547	3.46e-07	6.1e-06	6.56903
Arhgap26	1.33403	5.33537	6.45519	3.46e-07	6.1e-06	6.17886
Fam189b	1.11471	4.93727	6.45337	3.48e-07	6.12e-06	6.20974
Tekt1	-2.15898	2.84039	-6.45188	3.49e-07	6.14e-06	6.45307
Efemp2	-1.47162	5.04543	-6.45102	3.5e-07	6.14e-06	6.25783
D130040H23Rik	1.28032	4.32632	6.44849	3.52e-07	6.18e-06	6.30082
Cers1	2.46569	4.90452	6.44748	3.53e-07	6.19e-06	6.21843
Senp8	1.93563	2.64749	6.44687	3.54e-07	6.19e-06	6.51238
Il12rb2	-2.29727	0.49909	-6.4418	3.59e-07	6.28e-06	6.56965
Rab11fip1	-2.20185	0.594118	-6.43709	3.64e-07	6.35e-06	6.55752
Gpld1	-1.60212	3.53097	-6.43564	3.65e-07	6.37e-06	6.34656
Nhlrc1	1.27261	3.83134	6.43509	3.66e-07	6.37e-06	6.31789
P2ry13	-2.0245	-0.00872833	-6.43436	3.67e-07	6.38e-06	6.55477
Lrig3	-1.5692	2.85408	-6.43262	3.69e-07	6.4e-06	6.42733
Tmem169	1.172	4.74592	6.42935	3.72e-07	6.45e-06	6.17032
Klf13	0.881306	6.9935	6.42697	3.74e-07	6.49e-06	6.01389
Hfe	-1.86553	2.54342	-6.42603	3.75e-07	6.5e-06	6.42768
Mapkapk3	-1.53194	3.03466	-6.42019	3.82e-07	6.6e-06	6.35998
Aqp4	-1.39968	7.97874	-6.41899	3.83e-07	6.61e-06	5.97083
F11r	-2.21057	1.28648	-6.41869	3.83e-07	6.61e-06	6.47607
Cd300ld	-1.88794	-0.079337	-6.41775	3.84e-07	6.62e-06	6.50691
Akt3	0.96628	7.23739	6.41037	3.92e-07	6.75e-06	5.95804
Lpl	-1.23036	6.06521	-6.4082	3.95e-07	6.78e-06	5.99166
Cdh7	1.67408	2.24953	6.40547	3.98e-07	6.82e-06	6.36477
Stat6	-2.40277	1.68924	-6.40399	3.99e-07	6.84e-06	6.4125
Cnn3	-1.02153	9.65037	-6.39879	4.05e-07	6.94e-06	5.89474
Plaur	-2.33341	0.280137	-6.3982	4.06e-07	6.94e-06	6.44765
Fam114a1	-2.12109	2.02114	-6.39805	4.06e-07	6.94e-06	6.3936
Hyal1	-1.39099	3.92067	-6.39714	4.07e-07	6.94e-06	6.21024
Dnah6	-2.60744	1.18753	-6.39502	4.1e-07	6.98e-06	6.3962
Mdfic	-2.21412	3.70426	-6.39249	4.12e-07	7.02e-06	6.26636
Eef1e1	0.998538	6.77457	6.39143	4.14e-07	7.03e-06	5.92072
Coro7	0.94807	5.86897	6.39034	4.15e-07	7.04e-06	5.96301
Rhbdf2	-2.30054	1.65357	-6.3902	4.15e-07	7.04e-06	6.38664
Cachd1	-1.33112	5.03586	-6.3894	4.16e-07	7.04e-06	6.03013
Mrc2	-1.66389	3.69311	-6.38935	4.16e-07	7.04e-06	6.25426
Efhc1	-1.74705	2.08776	-6.38509	4.21e-07	7.12e-06	6.3516
Emp2	1.03416	7.4995	6.3772	4.31e-07	7.26e-06	5.87039
Sgpl1	-0.966936	6.76876	-6.37719	4.31e-07	7.26e-06	5.89216
Syk	-2.52623	0.568406	-6.3731	4.36e-07	7.33e-06	6.37621
Eif5	-0.670329	8.79316	-6.37298	4.36e-07	7.33e-06	5.82792
Itih5	-1.72912	5.07837	-6.37122	4.38e-07	7.36e-06	6.02182
Ripk1	-1.81317	3.32162	-6.36484	4.46e-07	7.48e-06	6.18526
Kantr	1.29156	5.5347	6.35947	4.53e-07	7.58e-06	5.91371
Fbln5	-1.58737	3.78759	-6.35941	4.53e-07	7.58e-06	6.16147
Prkcb	1.09093	7.4461	6.35608	4.57e-07	7.64e-06	5.80336
Sat1	-1.03616	4.68312	-6.35393	4.6e-07	7.68e-06	5.9637
Adamts12	-2.35337	1.94447	-6.35327	4.61e-07	7.68e-06	6.27634
Lrp2	-2.8047	3.06254	-6.34966	4.65e-07	7.75e-06	6.15327
Ift122	-0.861988	5.83204	-6.34846	4.67e-07	7.77e-06	5.86873
Prkab1	-0.994672	5.63837	-6.34536	4.71e-07	7.83e-06	5.88189
E2f6	-1.3074	4.12564	-6.34267	4.75e-07	7.88e-06	6.02133
Brinp3	1.47642	4.44026	6.33942	4.79e-07	7.94e-06	5.94772
Lpin3	-2.00722	1.10577	-6.3303	4.91e-07	8.14e-06	6.25903
Pnisr	1.18902	6.43687	6.32302	5.02e-07	8.3e-06	5.76564
Ly6e	1.26639	6.74234	6.32275	5.02e-07	8.3e-06	5.72065
Cpt1a	-1.40452	6.26111	-6.32234	5.03e-07	8.3e-06	5.77717
Adgrg6	-1.79268	2.31403	-6.32151	5.04e-07	8.31e-06	6.14503
Pcdh9	1.02741	5.91507	6.32052	5.05e-07	8.32e-06	5.77195
Chac2	1.28149	4.52552	6.31153	5.18e-07	8.52e-06	5.86105
Gpr25	1.83716	3.20882	6.30666	5.25e-07	8.63e-06	6.02285
Nr1d1	-1.23897	5.09444	-6.30619	5.26e-07	8.63e-06	5.81745
Itgav	-1.49414	5.78529	-6.30182	5.32e-07	8.73e-06	5.72252
Npy1r	1.48203	4.65665	6.30043	5.34e-07	8.75e-06	5.82778
Nsdhl	1.35804	7.24184	6.29895	5.37e-07	8.77e-06	5.6327
Shroom3	-2.5207	4.67523	-6.29879	5.37e-07	8.77e-06	5.88853
Spata6	-1.40162	4.08522	-6.29864	5.37e-07	8.77e-06	5.88101
Ybx1	0.895365	9.95225	6.29657	5.4e-07	8.8e-06	5.59717
Tsfm	1.05671	4.25295	6.29656	5.4e-07	8.8e-06	5.88952
Ccdc113	-1.88928	1.34378	-6.29621	5.41e-07	8.8e-06	6.10885
Hmgcr	0.996827	8.47693	6.29559	5.42e-07	8.8e-06	5.60784
Dnajb5	0.976296	7.32064	6.29445	5.44e-07	8.82e-06	5.62947
Polr3d	0.985924	5.31887	6.29122	5.49e-07	8.89e-06	5.73512
Ppp1r14c	0.988407	6.30787	6.28852	5.53e-07	8.94e-06	5.65023
Chst8	1.73873	4.29746	6.28838	5.53e-07	8.94e-06	5.8332
Serinc2	2.22369	2.44899	6.28468	5.59e-07	9.02e-06	6.07618
A830018L16Rik	1.05182	5.22979	6.28455	5.59e-07	9.02e-06	5.70293
F2r	-1.34672	4.45454	-6.28198	5.63e-07	9.08e-06	5.84091
Cnn1	-2.06461	2.07061	-6.28121	5.64e-07	9.08e-06	6.06884
Ikbke	-2.05113	2.0978	-6.28071	5.65e-07	9.09e-06	6.0573
Tbx15	-2.21715	0.806305	-6.2787	5.68e-07	9.13e-06	6.12301
Arrdc2	1.43923	2.6929	6.27775	5.7e-07	9.14e-06	6.01094
Lhfpl2	-1.41686	4.44855	-6.27363	5.76e-07	9.24e-06	5.80468
Zfp280d	1.50946	5.54877	6.26626	5.89e-07	9.42e-06	5.65473
Adamts17	-1.0991	4.78483	-6.25823	6.02e-07	9.63e-06	5.70817
Kirrel	-2.001	4.49617	-6.25177	6.13e-07	9.79e-06	5.77111
Tmem63a	-1.61856	2.00495	-6.25116	6.14e-07	9.8e-06	5.98264
Card9	-2.17141	0.293519	-6.24871	6.18e-07	9.86e-06	6.0453
Psme2b	-2.31112	2.16311	-6.24803	6.2e-07	9.87e-06	5.9733
Mcidas	-1.90939	0.363506	-6.24329	6.28e-07	9.99e-06	6.02388
Gxylt2	-1.50724	2.32867	-6.24278	6.29e-07	9.99e-06	5.93884
Mr1	-1.8444	2.99647	-6.23934	6.35e-07	1.01e-05	5.87501
Slc20a1	0.842366	7.01868	6.23484	6.43e-07	1.02e-05	5.47327
LOC108167946	1.82068	2.58225	6.23394	6.45e-07	1.02e-05	5.91048
Cd63	-1.37382	8.55463	-6.2284	6.55e-07	1.04e-05	5.42875
Kcnj9	1.43126	3.82462	6.22774	6.56e-07	1.04e-05	5.7196
Msrb2	-1.53109	3.4024	-6.22641	6.59e-07	1.04e-05	5.76936
Rsad2	-1.89777	0.275916	-6.22475	6.62e-07	1.04e-05	5.97413
Sstr2	1.72575	4.0454	6.22333	6.64e-07	1.05e-05	5.6866
Sesn2	-0.984183	5.24185	-6.21865	6.73e-07	1.06e-05	5.57196
Ubxn11	-1.62485	3.02019	-6.21714	6.76e-07	1.06e-05	5.79942
Pag1	-1.03047	6.40938	-6.21648	6.77e-07	1.06e-05	5.45744
Gns	-0.902717	7.42292	-6.21483	6.8e-07	1.07e-05	5.40995
Eng	-2.18003	1.177	-6.21099	6.88e-07	1.08e-05	5.89401
Lnp	0.94204	5.41273	6.21092	6.88e-07	1.08e-05	5.50457
Fabp4	-1.66268	0.033253	-6.21019	6.89e-07	1.08e-05	5.94293
Htra1	0.873849	5.80565	6.20845	6.93e-07	1.08e-05	5.45341
Zfp518b	1.32013	4.04857	6.20451	7.01e-07	1.09e-05	5.67854
Ttc1	1.6986	4.87455	6.19965	7.1e-07	1.11e-05	5.5976
Lamc1	-2.09456	5.68159	-6.19366	7.22e-07	1.12e-05	5.45544
Maf1	-0.872787	6.12144	-6.19134	7.27e-07	1.13e-05	5.40069
Utrn	-2.07631	3.62701	-6.1889	7.32e-07	1.14e-05	5.66375
Cbx4	1.40715	5.81551	6.17695	7.57e-07	1.17e-05	5.37959
Gstm1	-1.38605	10.2834	-6.17371	7.64e-07	1.18e-05	5.2506
Tmem106a	-2.09809	0.21655	-6.17308	7.66e-07	1.19e-05	5.83479
Klhl9	0.760759	7.91172	6.17092	7.7e-07	1.19e-05	5.26945
Maf	-0.984052	5.34416	-6.17001	7.72e-07	1.19e-05	5.38839
Rhbdd2	0.848909	6.11776	6.16821	7.76e-07	1.2e-05	5.32563
Tlcd1	1.25316	4.54252	6.16532	7.83e-07	1.21e-05	5.43881
Gpr3	1.99692	1.32838	6.16128	7.92e-07	1.22e-05	5.77582
Pde4a	1.54311	4.95293	6.16124	7.92e-07	1.22e-05	5.44342
Ccdc102a	-1.85657	2.88608	-6.15763	8e-07	1.23e-05	5.65806
Map3k19	-2.02385	2.06731	-6.15475	8.06e-07	1.24e-05	5.6866
Mpped2	1.16805	5.8553	6.1522	8.12e-07	1.24e-05	5.29982
Cfap69	-1.18381	2.75636	-6.15017	8.17e-07	1.25e-05	5.61223
Clvs2	1.48449	4.494	6.14975	8.18e-07	1.25e-05	5.39951
Fam83d	-1.38071	4.06078	-6.14726	8.24e-07	1.26e-05	5.50086
Mob3c	-1.55825	2.804	-6.14528	8.28e-07	1.26e-05	5.6014
Cyp1b1	-2.27973	3.36603	-6.14133	8.38e-07	1.28e-05	5.61642
Tgfbi	-2.33231	1.37996	-6.14125	8.38e-07	1.28e-05	5.68709
Gpr12	1.2083	4.43607	6.13647	8.49e-07	1.29e-05	5.36327
Deptor	-1.23325	3.95846	-6.13562	8.51e-07	1.29e-05	5.47103
Stpg1	-2.0735	1.36706	-6.1356	8.51e-07	1.29e-05	5.69491
Chsy3	1.31914	4.06573	6.12458	8.78e-07	1.33e-05	5.40113
St6galnac5	0.958447	6.66511	6.12335	8.81e-07	1.34e-05	5.16482
Flcn	-0.842365	6.20375	-6.12096	8.87e-07	1.34e-05	5.18899
Zfp266	0.753055	6.84909	6.1202	8.89e-07	1.34e-05	5.16259
Slc24a4	-2.8639	3.2445	-6.11909	8.92e-07	1.35e-05	5.55086
Oprm1	2.23227	0.990753	6.11686	8.98e-07	1.35e-05	5.65044
Tubb4a	0.901777	9.32669	6.1162	8.99e-07	1.36e-05	5.09651
Def6	-2.25521	0.826059	-6.11473	9.03e-07	1.36e-05	5.67203
Pex11g	-1.64408	1.48696	-6.11464	9.03e-07	1.36e-05	5.63562
Gm29508	-1.20284	2.97987	-6.10927	9.17e-07	1.38e-05	5.48175
Dtx3l	-2.25053	1.32184	-6.10748	9.22e-07	1.38e-05	5.60415
Slc1a2	1.28314	8.98167	6.1058	9.26e-07	1.39e-05	5.07131
Iqcd	-1.97792	0.767446	-6.10287	9.34e-07	1.4e-05	5.62369
Srsf6	-0.810159	7.20369	-6.10224	9.36e-07	1.4e-05	5.09167
Trip6	-1.64762	4.04909	-6.09904	9.44e-07	1.41e-05	5.40725
Trim25	-2.04009	1.40804	-6.09326	9.6e-07	1.43e-05	5.5654
Slc16a1	-1.12245	6.57706	-6.08972	9.69e-07	1.45e-05	5.07776
Pfdn5	1.46289	7.98474	6.08813	9.74e-07	1.45e-05	5.03756
Ggt5	-2.01883	0.661419	-6.0858	9.8e-07	1.46e-05	5.59259
Ccnd3	0.966414	6.14302	6.08411	9.85e-07	1.46e-05	5.09081
Bcl7a	0.941766	7.68101	6.08362	9.86e-07	1.46e-05	5.02633
Dydc2	-2.11213	0.669221	-6.08242	9.9e-07	1.47e-05	5.57081
Rerg	1.37925	2.7747	6.08214	9.9e-07	1.47e-05	5.49052
Il23r	-1.77378	-0.195939	-6.07501	1.01e-06	1.5e-05	5.57512
Sema4a	1.18389	4.19205	6.07374	1.01e-06	1.5e-05	5.22033
Atf3	-1.38191	4.33456	-6.07206	1.02e-06	1.51e-05	5.19048
Hspg2	-3.34201	3.89632	-6.06985	1.03e-06	1.51e-05	5.35533
Ngef	0.905424	7.34046	6.06862	1.03e-06	1.52e-05	4.98914
Gm15698	-3.47119	0.261844	-6.06825	1.03e-06	1.52e-05	5.52387
Rasgrp1	1.38315	4.38336	6.06798	1.03e-06	1.52e-05	5.22034
Sqle	1.10487	8.67676	6.06778	1.03e-06	1.52e-05	4.95799
Mcm7	-0.881613	6.47822	-6.06341	1.04e-06	1.53e-05	5.02306
Nfat5	-1.17762	5.73925	-6.0619	1.05e-06	1.54e-05	5.03953
Kcnn1	1.28838	4.39878	6.06172	1.05e-06	1.54e-05	5.13486
Cacng5	1.22394	4.1174	6.06121	1.05e-06	1.54e-05	5.23759
Trim12c	-2.14385	1.1035	-6.06008	1.05e-06	1.54e-05	5.50991
Zfp40	1.33463	3.52194	6.05946	1.06e-06	1.54e-05	5.33459
Col7a1	-1.95186	1.11704	-6.05881	1.06e-06	1.54e-05	5.4998
Tmem67	-1.22487	3.80734	-6.05633	1.07e-06	1.55e-05	5.20758
Tcf12	-0.823291	7.20266	-6.05532	1.07e-06	1.56e-05	4.95958
Npl	-1.03379	4.54237	-6.05435	1.07e-06	1.56e-05	5.13458
Scg2	1.23314	7.59337	6.05374	1.07e-06	1.56e-05	4.94841
Ms4a6b	-1.93119	0.0886978	-6.05207	1.08e-06	1.57e-05	5.50731
Glra2	1.29894	5.79623	6.05112	1.08e-06	1.57e-05	5.00742
Hist1h1e	1.03192	7.82595	6.04705	1.09e-06	1.59e-05	4.93263
Mlc1	-1.79679	5.52452	-6.04592	1.1e-06	1.59e-05	5.04957
Myl9	-1.82229	4.19185	-6.04306	1.11e-06	1.6e-05	5.25659
Ulbp1	-1.71732	0.1001	-6.0353	1.13e-06	1.63e-05	5.46332
Was	-2.28587	0.142366	-6.03511	1.13e-06	1.63e-05	5.45595
Nek2	-1.76964	3.29195	-6.0329	1.14e-06	1.64e-05	5.25869
Fam46c	-2.48156	0.525621	-6.0327	1.14e-06	1.64e-05	5.44025
Adi1	-0.994424	5.56016	-6.0298	1.15e-06	1.65e-05	4.97601
Synpo	1.08738	3.71945	6.02902	1.15e-06	1.66e-05	5.16203
Ctnnal1	-1.65307	4.45129	-6.02547	1.16e-06	1.67e-05	5.08759
Lyn	-2.46271	1.41067	-6.02498	1.16e-06	1.67e-05	5.37283
Spata17	-1.85535	1.31007	-6.01737	1.19e-06	1.71e-05	5.37449
Epha6	1.22259	4.97671	6.01652	1.19e-06	1.71e-05	4.97888
Cd151	-1.07012	6.71626	-6.01396	1.2e-06	1.72e-05	4.87118
Kif20a	-1.30679	4.91294	-6.01213	1.21e-06	1.73e-05	5.01788
Hexa	-0.934884	5.89592	-6.00995	1.22e-06	1.74e-05	4.88138
Lix1	-0.846475	6.68174	-6.00498	1.23e-06	1.76e-05	4.83381
Prr5l	-2.23243	2.29994	-6.00264	1.24e-06	1.77e-05	5.29083
Myof	-1.90733	2.4257	-5.99865	1.25e-06	1.79e-05	5.24963
Casc1	-1.79128	1.06024	-5.99778	1.26e-06	1.79e-05	5.32577
Cdk5rap2	-1.49896	5.03489	-5.99609	1.26e-06	1.8e-05	4.96197
Cbs	1.21083	4.54229	5.99335	1.27e-06	1.81e-05	4.97448
Gja1	-1.24051	9.15645	-5.99072	1.28e-06	1.82e-05	4.74782
Rnf165	1.00027	6.32223	5.99061	1.28e-06	1.82e-05	4.80238
Il20rb	-1.68168	1.37122	-5.98877	1.29e-06	1.83e-05	5.26136
Pdp2	1.27728	3.0226	5.9855	1.3e-06	1.84e-05	5.14556
Fzd6	-1.71721	2.85228	-5.98316	1.31e-06	1.85e-05	5.18726
Gal3st3	1.04729	6.33003	5.97848	1.33e-06	1.87e-05	4.78567
Tsnaxip1	-1.65773	0.581076	-5.9781	1.33e-06	1.88e-05	5.28488
Gatm	0.973919	6.24852	5.97696	1.33e-06	1.88e-05	4.76871
Mob1a	-0.938952	5.54588	-5.97454	1.34e-06	1.89e-05	4.81887
Samhd1	-1.17276	4.20469	-5.97069	1.36e-06	1.91e-05	4.96058
B3gat3	0.871371	6.40465	5.96914	1.36e-06	1.91e-05	4.73801
9330133O14Rik	1.17701	4.35826	5.969	1.37e-06	1.91e-05	4.96647
Unc5a	1.36464	5.47487	5.95687	1.41e-06	1.98e-05	4.76054
Chfr	0.94107	6.11754	5.95641	1.41e-06	1.98e-05	4.71899
Mme	-1.43669	3.32394	-5.95537	1.42e-06	1.98e-05	5.00732
Ace2	-1.71853	-0.132566	-5.95386	1.43e-06	1.99e-05	5.24087
Ccdc170	-1.96537	1.50222	-5.95022	1.44e-06	2.01e-05	5.16835
Tceal5	1.35061	4.78465	5.94821	1.45e-06	2.02e-05	4.80617
Tgfb3	-1.20754	4.35319	-5.94513	1.46e-06	2.04e-05	4.90486
9030617O03Rik	-1.27804	4.08668	-5.94416	1.47e-06	2.04e-05	4.93266
Nrep	0.802964	9.77986	5.93894	1.49e-06	2.07e-05	4.58749
1700028P14Rik	-1.82901	1.33919	-5.9385	1.49e-06	2.07e-05	5.11362
Fgfr2	-0.933669	6.76311	-5.93735	1.49e-06	2.07e-05	4.63968
Kansl1	-0.968249	6.76779	-5.93724	1.49e-06	2.07e-05	4.64156
Mettl7a1	-1.57651	3.4279	-5.93483	1.5e-06	2.08e-05	4.96099
Plekhb1	-1.15514	5.75521	-5.93285	1.51e-06	2.09e-05	4.70311
Ccnb2	-0.965514	4.01262	-5.92745	1.54e-06	2.12e-05	4.85099
Ccl4	-1.71747	-0.331397	-5.92558	1.54e-06	2.13e-05	5.16275
Ttll9	-1.91866	1.29175	-5.92297	1.56e-06	2.15e-05	5.10285
Leng1	1.20699	4.3588	5.9221	1.56e-06	2.15e-05	4.80098
Gdf15	-2.22847	1.34738	-5.92109	1.56e-06	2.15e-05	5.11429
Trpm3	1.33852	4.78227	5.91816	1.58e-06	2.17e-05	4.71112
Gpbp1l1	-1.28853	4.59354	-5.91408	1.6e-06	2.19e-05	4.75694
Ccnd2	-0.900078	7.8956	-5.9138	1.6e-06	2.19e-05	4.54263
Rpf2	0.996636	6.11179	5.91328	1.6e-06	2.19e-05	4.60449
Slc41a1	-0.969153	7.20717	-5.90061	1.66e-06	2.27e-05	4.53683
Plpp6	1.18432	3.6604	5.89987	1.66e-06	2.27e-05	4.84878
Slco4c1	2.08148	0.864547	5.89736	1.67e-06	2.29e-05	5.02637
Tmc6	-1.73219	1.55323	-5.89694	1.68e-06	2.29e-05	5.02582
Syt5	1.24597	7.75696	5.89596	1.68e-06	2.29e-05	4.48905
Zfp516	-1.39659	4.54294	-5.89255	1.7e-06	2.31e-05	4.7673
Mtmr7	1.1537	5.55354	5.89165	1.7e-06	2.32e-05	4.56058
Tead4	-2.37663	1.29686	-5.89039	1.71e-06	2.32e-05	5.04379
Uqcc2	0.900617	6.97763	5.88586	1.73e-06	2.35e-05	4.48593
Acod1	-1.58703	-0.515475	-5.88569	1.73e-06	2.35e-05	5.05744
Dnaaf1	-1.91732	1.39656	-5.88303	1.74e-06	2.37e-05	4.98774
Plch1	-1.45053	3.18874	-5.88073	1.75e-06	2.38e-05	4.84641
Upf2	-0.994572	5.5407	-5.87785	1.77e-06	2.4e-05	4.53926
Bmp1	-0.866882	6.08172	-5.87389	1.79e-06	2.42e-05	4.4917
Rnf208	1.23917	6.60565	5.86973	1.81e-06	2.45e-05	4.4542
Abhd3	1.06512	5.26265	5.86915	1.81e-06	2.45e-05	4.56958
Il6ra	-2.2745	0.54032	-5.86732	1.82e-06	2.46e-05	4.98111
Sdc4	-1.2182	7.00626	-5.86695	1.82e-06	2.46e-05	4.43518
Zfp458	1.63572	2.42897	5.86523	1.83e-06	2.47e-05	4.89601
Hspa4l	-1.01945	6.02259	-5.86511	1.83e-06	2.47e-05	4.46166
Gm11992	-1.48679	2.57943	-5.86303	1.85e-06	2.48e-05	4.83618
Map10	1.71922	2.55617	5.86193	1.85e-06	2.49e-05	4.88605
Kat2b	-1.32883	4.74135	-5.85962	1.86e-06	2.5e-05	4.61468
Dleu7	1.48132	2.85857	5.85803	1.87e-06	2.51e-05	4.78246
Rhod	-1.81138	2.00852	-5.85307	1.9e-06	2.54e-05	4.88296
Mogs	0.999961	5.28218	5.85238	1.9e-06	2.55e-05	4.51063
Man2b2	-1.48439	5.36388	-5.85161	1.91e-06	2.55e-05	4.52856
Jakmip1	1.00183	6.30241	5.85068	1.91e-06	2.55e-05	4.39863
Nme5	-1.59426	3.36414	-5.84629	1.94e-06	2.58e-05	4.7043
Fhad1	-2.03754	1.6123	-5.84468	1.94e-06	2.59e-05	4.85808
Phactr1	1.00004	7.98143	5.84417	1.95e-06	2.59e-05	4.33956
Magee2	1.49033	3.06528	5.84302	1.95e-06	2.6e-05	4.73058
Gsg1l	1.35097	3.98732	5.84282	1.95e-06	2.6e-05	4.59848
Rara	0.907783	4.99025	5.84168	1.96e-06	2.6e-05	4.48284
Cox6b2	-1.77365	4.28214	-5.83876	1.98e-06	2.62e-05	4.6145
Kansl1l	-0.975018	4.74906	-5.83874	1.98e-06	2.62e-05	4.50328
Sh3gl3	1.01829	6.07469	5.83683	1.99e-06	2.63e-05	4.38205
Ifit2	-1.42419	3.87839	-5.82876	2.03e-06	2.69e-05	4.66448
Flrt2	1.51255	4.27668	5.82786	2.04e-06	2.7e-05	4.5344
Tle4	0.800459	6.88565	5.8272	2.04e-06	2.7e-05	4.32203
Mdm2	-1.25998	3.81805	-5.82673	2.05e-06	2.7e-05	4.56183
9430020K01Rik	-1.09471	5.94416	-5.82335	2.07e-06	2.72e-05	4.35927
Mapre1	0.857388	8.13072	5.82227	2.07e-06	2.73e-05	4.27943
Bicc1	-2.01037	2.69829	-5.81958	2.09e-06	2.75e-05	4.71159
Sparcl1	0.891713	10.2375	5.81866	2.09e-06	2.75e-05	4.24244
Dync1i1	1.15004	6.53897	5.81387	2.12e-06	2.79e-05	4.29196
Nlrc5	-2.15676	0.276353	-5.81339	2.13e-06	2.79e-05	4.84645
4932443I19Rik	-1.94094	2.27429	-5.81056	2.14e-06	2.81e-05	4.73314
BC048403	1.05674	3.95577	5.80859	2.15e-06	2.82e-05	4.55076
Lyar	1.02533	4.20741	5.80694	2.16e-06	2.83e-05	4.49901
Ston2	-1.53087	4.53629	-5.80626	2.17e-06	2.84e-05	4.48177
Zfp341	1.10932	4.86233	5.80476	2.18e-06	2.85e-05	4.40872
Tram1l1	1.04255	5.0098	5.8019	2.2e-06	2.87e-05	4.36467
Serping1	-2.40654	0.829404	-5.79878	2.22e-06	2.89e-05	4.7887
Sncaip	-1.13979	5.26831	-5.79696	2.23e-06	2.9e-05	4.37181
Cd300lf	-1.60832	-0.467289	-5.79475	2.24e-06	2.92e-05	4.80595
Atxn7	-1.01635	4.11396	-5.79325	2.25e-06	2.93e-05	4.46521
2410015M20Rik	0.809394	6.08093	5.78396	2.31e-06	3e-05	4.2485
Fam136a	1.8091	1.8396	5.77938	2.34e-06	3.04e-05	4.68548
Sfxn5	1.05151	7.05199	5.7787	2.35e-06	3.04e-05	4.18519
Wwp2	-0.971337	4.62523	-5.77649	2.36e-06	3.06e-05	4.3555
Ndfip2	0.864293	7.67193	5.7764	2.36e-06	3.06e-05	4.15068
Meaf6	0.828536	7.62304	5.77309	2.38e-06	3.08e-05	4.14721
Gm32647	1.73757	1.89833	5.76945	2.41e-06	3.11e-05	4.60544
Stat3	-1.14232	7.57164	-5.76833	2.42e-06	3.12e-05	4.13755
Cep55	-1.09964	2.75877	-5.76766	2.42e-06	3.12e-05	4.56945
Inf2	0.999298	4.79392	5.76628	2.43e-06	3.13e-05	4.28589
Gabrb2	1.29783	6.30833	5.76496	2.44e-06	3.14e-05	4.1773
Olfml2a	-2.20768	2.0731	-5.76257	2.46e-06	3.16e-05	4.63346
Zfp930	1.22203	3.52028	5.75794	2.49e-06	3.2e-05	4.48692
Ifi35	-2.32714	0.849607	-5.75758	2.49e-06	3.2e-05	4.67245
Gm30684	1.8872	0.591307	5.75751	2.49e-06	3.2e-05	4.68195
Dguok	1.19042	4.42011	5.75732	2.49e-06	3.2e-05	4.35979
Slc25a4	0.753525	10.0991	5.75323	2.52e-06	3.23e-05	4.05451
Got1l1	-1.97554	0.597809	-5.75128	2.54e-06	3.25e-05	4.65834
Adamts1	-1.1884	5.84873	-5.74791	2.56e-06	3.28e-05	4.13197
Casp8	-1.86208	0.353798	-5.74622	2.57e-06	3.29e-05	4.66186
Emd	0.938684	6.57753	5.74258	2.6e-06	3.32e-05	4.0886
Dyrk3	-1.19383	4.11129	-5.74137	2.61e-06	3.33e-05	4.29545
Atoh8	-2.03638	2.96193	-5.73717	2.64e-06	3.37e-05	4.53515
Tmem28	1.25062	4.96589	5.73536	2.65e-06	3.38e-05	4.16463
Rimbp2	1.14707	6.06357	5.73392	2.67e-06	3.39e-05	4.09305
Fgf10	1.73311	2.86896	5.73247	2.68e-06	3.4e-05	4.41839
Pdgfd	-1.50566	2.43108	-5.73141	2.68e-06	3.41e-05	4.51849
Timmdc1	0.930258	5.4183	5.72854	2.71e-06	3.43e-05	4.11948
Zfp493	1.43957	2.832	5.72732	2.72e-06	3.44e-05	4.4678
Hspa12a	1.37568	5.91993	5.72671	2.72e-06	3.45e-05	4.07944
Sgol2a	-1.10486	3.49604	-5.72514	2.73e-06	3.46e-05	4.36755
Galnt4	-1.48143	2.4014	-5.72388	2.74e-06	3.47e-05	4.48568
Nuak1	-0.771288	6.5226	-5.72307	2.75e-06	3.47e-05	4.04338
Nek11	-1.31828	3.49008	-5.72277	2.75e-06	3.47e-05	4.36951
Tmem179	1.17723	5.87542	5.7217	2.76e-06	3.48e-05	4.0726
Ttll3	-1.33923	2.56484	-5.72139	2.76e-06	3.48e-05	4.46006
Cbarp	1.34042	7.6351	5.72005	2.77e-06	3.49e-05	3.99883
Pdk4	-1.67863	3.77338	-5.71844	2.79e-06	3.5e-05	4.35131
Stxbp6	0.939019	5.76844	5.71815	2.79e-06	3.5e-05	4.07883
Ckap2l	-1.00442	4.32631	-5.71804	2.79e-06	3.5e-05	4.21034
Sox5	0.923061	6.21296	5.71757	2.79e-06	3.5e-05	4.03797
Cpeb2	0.844471	5.99107	5.71676	2.8e-06	3.51e-05	4.04628
Birc3	-1.98772	-0.0278188	-5.71598	2.81e-06	3.51e-05	4.57388
Bcat1	0.947682	6.8288	5.71562	2.81e-06	3.51e-05	4.01798
Cd86	-2.15868	-0.087494	-5.71447	2.82e-06	3.52e-05	4.57095
Cnksr2	0.980263	6.95412	5.71443	2.82e-06	3.52e-05	3.98813
Ncf4	-1.81022	-0.140738	-5.71397	2.82e-06	3.52e-05	4.57765
Amotl1	-1.07902	5.62196	-5.71387	2.82e-06	3.52e-05	4.1197
Wnt5b	-1.59937	2.43959	-5.71238	2.83e-06	3.53e-05	4.44567
Tmem59	-0.789564	6.82298	-5.71172	2.84e-06	3.53e-05	3.99879
Mcam	-1.58603	2.95986	-5.71113	2.84e-06	3.54e-05	4.37658
Neat1	-2.38563	1.29446	-5.70846	2.87e-06	3.56e-05	4.49229
Ecscr	-2.02184	0.558251	-5.70823	2.87e-06	3.56e-05	4.544
Zdhhc12	1.08011	3.76982	5.70809	2.87e-06	3.56e-05	4.29944
Prkcdbp	-2.17824	2.03904	-5.70537	2.89e-06	3.58e-05	4.48533
Bub1b	-1.10021	4.07555	-5.70424	2.9e-06	3.59e-05	4.24386
Epc1	-0.68494	6.60076	-5.69879	2.95e-06	3.64e-05	3.96564
Cks1b	-0.754646	5.59462	-5.69801	2.95e-06	3.65e-05	4.0229
Kcnip3	0.727215	7.09617	5.69801	2.95e-06	3.65e-05	3.95386
Tpx2	-1.05266	4.51529	-5.69527	2.98e-06	3.67e-05	4.14231
Phldb2	-1.80749	2.55084	-5.69489	2.98e-06	3.67e-05	4.42828
Htr1f	1.97581	0.790793	5.69033	3.02e-06	3.72e-05	4.48559
Zc4h2	0.673097	6.19568	5.68359	3.08e-06	3.79e-05	3.95028
1700123M08Rik	-2.03348	1.69836	-5.68034	3.11e-06	3.82e-05	4.41101
Fgf7	-1.80983	1.1165	-5.67696	3.14e-06	3.85e-05	4.42155
Ccl12	-1.43841	-0.373143	-5.67637	3.14e-06	3.86e-05	4.48165
Nek6	-0.855854	6.4058	-5.67338	3.17e-06	3.88e-05	3.91521
Dcn	-1.27899	5.08307	-5.67338	3.17e-06	3.88e-05	4.02678
D17H6S56E-5	-1.23899	2.90594	-5.67228	3.18e-06	3.89e-05	4.26039
Zdhhc22	1.61151	2.57497	5.66995	3.2e-06	3.91e-05	4.30369
Bbox1	-1.63338	0.142494	-5.66798	3.22e-06	3.93e-05	4.43572
Slc2a1	-1.08948	6.43599	-5.66478	3.25e-06	3.96e-05	3.86984
Olfm3	1.272	3.365	5.66388	3.25e-06	3.97e-05	4.19773
Zfp612	1.25491	3.23434	5.66375	3.26e-06	3.97e-05	4.2427
Crocc2	-1.92761	0.776138	-5.6628	3.26e-06	3.98e-05	4.38496
Zfp174	1.32515	2.95223	5.66138	3.28e-06	3.99e-05	4.26347
Gm7694	-2.03799	2.58312	-5.66031	3.29e-06	4e-05	4.29492
Thtpa	0.990685	4.7854	5.65964	3.29e-06	4e-05	4.03027
Swap70	-1.3121	4.37638	-5.65725	3.32e-06	4.03e-05	4.11665
Tmem200c	0.88901	4.721	5.6571	3.32e-06	4.03e-05	3.97381
Ikzf1	-1.83267	-0.127717	-5.65333	3.35e-06	4.07e-05	4.40777
Parp10	-1.6695	1.85661	-5.64985	3.39e-06	4.1e-05	4.312
Parp4	-2.28119	3.25683	-5.64966	3.39e-06	4.1e-05	4.22677
Slc37a4	0.980036	5.05837	5.64833	3.4e-06	4.11e-05	3.92598
Srm	0.877645	7.16702	5.64817	3.4e-06	4.11e-05	3.80498
Epc2	-1.07068	6.29673	-5.64795	3.41e-06	4.11e-05	3.83796
Fam216b	-2.19399	1.56599	-5.64473	3.44e-06	4.14e-05	4.2783
Ehd2	-1.7893	3.6773	-5.64454	3.44e-06	4.14e-05	4.18303
Simc1	1.00434	4.0704	5.6437	3.45e-06	4.15e-05	4.05128
Cenpe	-1.20929	3.88375	-5.64142	3.47e-06	4.17e-05	4.07425
P2rx7	-2.04433	2.21545	-5.6389	3.5e-06	4.2e-05	4.24695
Rrp1b	1.07429	4.07082	5.63848	3.5e-06	4.2e-05	4.07391
Rasal3	-1.97291	-0.0947916	-5.63788	3.51e-06	4.21e-05	4.36264
Igsf11	-1.01032	6.6945	-5.63415	3.54e-06	4.25e-05	3.79014
Stac	1.4143	2.65373	5.63295	3.56e-06	4.26e-05	4.16601
Exoc3l4	-1.68145	0.696799	-5.63174	3.57e-06	4.27e-05	4.33459
Nptx2	1.41781	4.45468	5.63149	3.57e-06	4.27e-05	3.98868
Atxn1l	-1.23026	3.92766	-5.62997	3.59e-06	4.28e-05	4.04354
Slc43a3	-2.29311	1.71895	-5.62891	3.6e-06	4.29e-05	4.2786
Cmtm6	-1.08012	5.60463	-5.62163	3.67e-06	4.38e-05	3.82724
3632454L22Rik	1.61786	1.21485	5.6167	3.72e-06	4.44e-05	4.26367
Rprm	1.4744	5.87171	5.61646	3.73e-06	4.44e-05	3.76649
Ints7	-0.756739	6.25334	-5.61555	3.74e-06	4.45e-05	3.75115
Mcl1	-0.893358	6.37858	-5.6139	3.75e-06	4.46e-05	3.74087
Ogt	-0.794004	7.31989	-5.61333	3.76e-06	4.47e-05	3.70037
Egr4	1.62533	2.35568	5.60963	3.8e-06	4.51e-05	4.1303
Ifi44	-1.7171	-0.233666	-5.60894	3.81e-06	4.52e-05	4.28689
Impa1	1.017	6.84959	5.60789	3.82e-06	4.53e-05	3.69834
Pcgf5	-1.92008	3.19523	-5.60181	3.89e-06	4.6e-05	4.06368
Rbm38	-1.21274	4.85227	-5.60025	3.9e-06	4.62e-05	3.8535
Svil	-1.14895	3.67777	-5.59947	3.91e-06	4.62e-05	4.00885
Exoc6	0.820138	5.3979	5.59789	3.93e-06	4.64e-05	3.73636
Gm32133	-1.78508	0.791115	-5.59668	3.94e-06	4.65e-05	4.21063
Dnmbp	-1.20927	4.72508	-5.59644	3.95e-06	4.65e-05	3.85385
Rogdi	0.949718	5.8796	5.594	3.97e-06	4.68e-05	3.73647
5330417C22Rik	0.96863	4.39305	5.59033	4.02e-06	4.73e-05	3.87454
LOC102635844	-1.62156	2.04407	-5.58953	4.02e-06	4.73e-05	4.12777
Cep192	-1.22608	3.7314	-5.5872	4.05e-06	4.76e-05	3.95673
Iqck	-1.8047	2.18411	-5.58553	4.07e-06	4.78e-05	4.10377
Ppp1r3d	1.26068	3.06799	5.58482	4.08e-06	4.79e-05	4.03617
Creb3l2	-1.42011	4.49559	-5.58458	4.08e-06	4.79e-05	3.8623
Hacd1	1.12096	5.68975	5.5838	4.09e-06	4.79e-05	3.67523
E030003E18Rik	-1.76181	3.13676	-5.58142	4.12e-06	4.82e-05	3.97859
Sync	-1.81186	1.59239	-5.58114	4.12e-06	4.82e-05	4.15164
Isg20	-1.96368	0.323794	-5.58031	4.13e-06	4.83e-05	4.20108
Pfdn4	0.922483	6.38197	5.57973	4.14e-06	4.83e-05	3.63287
Gm6548	-2.27959	2.88786	-5.57926	4.14e-06	4.84e-05	4.02724
Cyp4f15	1.39407	1.94474	5.57478	4.2e-06	4.89e-05	4.08157
Rprml	1.56726	5.31765	5.57104	4.24e-06	4.94e-05	3.67248
Gulp1	-1.36421	3.36186	-5.56768	4.28e-06	4.99e-05	3.91448
Dnaic1	-1.50096	1.78397	-5.56689	4.29e-06	4.99e-05	4.05401
Lst1	-1.71306	1.40207	-5.56612	4.3e-06	5e-05	4.07785
St8sia1	0.953353	5.32404	5.56215	4.35e-06	5.05e-05	3.66778
Dennd4c	-1.07028	4.78938	-5.56176	4.36e-06	5.05e-05	3.72169
Zfp9	1.10654	5.31665	5.56017	4.38e-06	5.07e-05	3.6671
Cntnap4	1.26638	4.49245	5.5579	4.41e-06	5.1e-05	3.74858
Tcf7l1	-1.17576	4.88249	-5.55593	4.43e-06	5.12e-05	3.72622
9430038I01Rik	1.36604	2.45194	5.5559	4.43e-06	5.12e-05	4.00501
Rbm11	1.71749	2.27368	5.55464	4.45e-06	5.14e-05	4.03573
Tgfbr3	-1.60588	2.00351	-5.55384	4.46e-06	5.15e-05	4.05132
Tmem258	1.49285	2.44353	5.54731	4.54e-06	5.24e-05	3.98363
Zbtb34	-1.53243	1.96086	-5.54635	4.55e-06	5.25e-05	4.01487
Rasd1	1.85826	0.70319	5.54465	4.58e-06	5.27e-05	4.07745
Glis3	-2.09786	2.51552	-5.54447	4.58e-06	5.27e-05	3.97086
Phf3	-0.858917	7.27417	-5.54305	4.6e-06	5.29e-05	3.50164
Begain	0.863254	6.25936	5.53943	4.64e-06	5.34e-05	3.5251
Tlr9	-1.65665	-0.0748994	-5.53141	4.75e-06	5.46e-05	4.07022
Mcu	0.839492	6.11237	5.52553	4.83e-06	5.54e-05	3.47952
Fam57a	1.35566	3.26794	5.52279	4.87e-06	5.58e-05	3.82339
Nrgn	1.7125	8.09751	5.52163	4.89e-06	5.6e-05	3.41561
Clstn2	0.769703	6.55299	5.52133	4.89e-06	5.6e-05	3.46346
Tubg1	1.02494	5.75758	5.52097	4.9e-06	5.6e-05	3.52519
Ttyh2	-1.10051	5.76885	-5.5198	4.91e-06	5.61e-05	3.52811
Tbc1d31	-1.51569	3.00672	-5.51969	4.91e-06	5.61e-05	3.85343
Urod	-0.865165	5.34506	-5.51635	4.96e-06	5.66e-05	3.5428
Gm32281	1.85744	0.47952	5.51371	5e-06	5.7e-05	4.01539
Dhrs7	-1.08678	4.46678	-5.51002	5.05e-06	5.75e-05	3.62226
Morc2a	-0.672409	6.03879	-5.50938	5.06e-06	5.76e-05	3.46524
P4ha2	1.20916	3.71435	5.50733	5.09e-06	5.79e-05	3.62411
Catip	-1.8822	1.20215	-5.50606	5.11e-06	5.8e-05	3.95113
Abcg1	-0.908508	4.52959	-5.50291	5.16e-06	5.85e-05	3.55638
Clk2	0.97037	5.70457	5.50246	5.16e-06	5.86e-05	3.47591
Samd5	-1.29031	3.71241	-5.5019	5.17e-06	5.86e-05	3.76858
2900026A02Rik	0.908241	5.80707	5.50025	5.19e-06	5.88e-05	3.44782
A630001G21Rik	-1.8235	0.169729	-5.49908	5.21e-06	5.9e-05	3.98017
Pnpla2	-1.20585	5.55612	-5.49874	5.22e-06	5.9e-05	3.46375
Dennd3	1.47316	2.26892	5.49492	5.27e-06	5.96e-05	3.85219
Pde9a	1.04824	5.27556	5.49487	5.27e-06	5.96e-05	3.52622
Oas1a	-1.67879	-0.420909	-5.49334	5.3e-06	5.98e-05	3.97024
Ltc4s	-1.98471	0.0323729	-5.4922	5.32e-06	5.99e-05	3.94988
Smpdl3b	-1.90046	2.40662	-5.49028	5.34e-06	6.02e-05	3.83882
Trh	1.68138	0.608937	5.48975	5.35e-06	6.02e-05	3.93141
Dmkn	-1.48712	0.989188	-5.48745	5.39e-06	6.06e-05	3.88602
Adgre5	-1.23415	3.099	-5.48529	5.42e-06	6.09e-05	3.75289
Pea15a	-0.775234	10.886	-5.48462	5.43e-06	6.1e-05	3.28357
Cabp1	1.00162	3.47356	5.48155	5.48e-06	6.15e-05	3.61533
Tmem180	0.9337	4.45605	5.48054	5.5e-06	6.16e-05	3.51486
Itga11	-1.79683	1.01375	-5.48047	5.5e-06	6.16e-05	3.90018
Adrbk2	1.10074	5.13153	5.47964	5.51e-06	6.17e-05	3.45928
Neurl3	-1.86059	-0.114264	-5.47808	5.53e-06	6.19e-05	3.9206
Loxl3	-1.57156	3.57251	-5.47517	5.58e-06	6.24e-05	3.67139
Actr3b	0.837751	6.80888	5.47359	5.61e-06	6.26e-05	3.30459
Cfap46	-2.05992	0.97481	-5.47227	5.63e-06	6.28e-05	3.85933
Col15a1	1.94094	1.63839	5.47086	5.65e-06	6.3e-05	3.79048
Ndnl2	1.21996	5.46742	5.4702	5.66e-06	6.31e-05	3.41336
Hepacam	-1.67336	6.38368	-5.46837	5.69e-06	6.34e-05	3.34619
Zfp759	1.23459	3.3074	5.46517	5.74e-06	6.39e-05	3.69225
Mettl4	0.71439	5.84077	5.46409	5.76e-06	6.4e-05	3.35564
Renbp	-1.41699	3.10839	-5.46251	5.79e-06	6.43e-05	3.65668
Fam49b	0.971528	7.15595	5.46134	5.81e-06	6.44e-05	3.26342
Apba2	0.868623	8.06197	5.45961	5.83e-06	6.47e-05	3.24516
Tiam2	0.768679	6.16731	5.45949	5.84e-06	6.47e-05	3.32684
Mns1	-1.85739	2.75811	-5.45847	5.85e-06	6.48e-05	3.68511
Mdk	1.49354	6.70559	5.45793	5.86e-06	6.48e-05	3.32024
Nts	1.60647	2.78626	5.45792	5.86e-06	6.48e-05	3.74615
Srek1	0.80884	5.40254	5.45608	5.89e-06	6.51e-05	3.3417
Kcnk12	1.38424	3.25707	5.45551	5.9e-06	6.52e-05	3.62621
Grasp	0.962915	4.05859	5.45185	5.97e-06	6.58e-05	3.49005
Gclc	-0.949542	6.701	-5.45176	5.97e-06	6.58e-05	3.25974
Vstm5	1.66801	2.37597	5.44966	6e-06	6.61e-05	3.66371
Abcb9	1.08473	4.39407	5.44862	6.02e-06	6.63e-05	3.4247
Tap1	-1.49224	2.53078	-5.44754	6.04e-06	6.64e-05	3.70173
Cdo1	0.972457	6.37723	5.44523	6.08e-06	6.68e-05	3.24726
Acsl3	0.904905	7.26053	5.44174	6.14e-06	6.74e-05	3.20719
Lpcat4	1.05603	4.56305	5.44172	6.14e-06	6.74e-05	3.38259
Foxd1	-1.82067	0.544833	-5.43992	6.17e-06	6.77e-05	3.79889
Pafah1b2	1.21343	7.51239	5.43958	6.18e-06	6.77e-05	3.20588
Cdc20	-1.25905	4.64175	-5.43726	6.22e-06	6.81e-05	3.4011
Sirt6	1.11289	3.99501	5.43547	6.25e-06	6.84e-05	3.50232
Cfap45	-1.95882	2.69438	-5.43487	6.26e-06	6.84e-05	3.623
Tns1	-1.75249	4.01642	-5.43356	6.29e-06	6.86e-05	3.50072
Thy1	0.984538	9.0012	5.43342	6.29e-06	6.86e-05	3.15354
Nabp2	0.895418	7.40623	5.42817	6.38e-06	6.96e-05	3.17028
Ccl2	-2.48282	1.19402	-5.4281	6.38e-06	6.96e-05	3.74513
Vstm2a	0.948886	6.79818	5.42669	6.41e-06	6.98e-05	3.18329
Dnah11	-1.96696	0.863046	-5.42515	6.44e-06	7.01e-05	3.73236
Gm5607	-1.17118	4.20738	-5.42448	6.45e-06	7.01e-05	3.45711
Ranbp10	-0.894567	5.00609	-5.42351	6.47e-06	7.03e-05	3.29675
Tldc1	0.877157	4.36663	5.42258	6.49e-06	7.04e-05	3.41257
Psrc1	-1.20409	4.41066	-5.42216	6.49e-06	7.04e-05	3.39745
Gdf1	0.787453	6.89764	5.42144	6.51e-06	7.05e-05	3.16659
Gys1	0.845559	5.52566	5.42137	6.51e-06	7.05e-05	3.22588
Irf7	-1.99498	0.962091	-5.41768	6.58e-06	7.12e-05	3.6964
Crym	1.9357	4.87943	5.41487	6.63e-06	7.17e-05	3.25712
Fads1	0.663368	9.27905	5.41394	6.65e-06	7.18e-05	3.09957
Rab15	1.12724	5.41268	5.41102	6.7e-06	7.23e-05	3.22644
Gigyf2	0.693277	5.96026	5.41089	6.71e-06	7.23e-05	3.17985
Fastkd1	1.09408	3.23637	5.41069	6.71e-06	7.23e-05	3.50398
Nrsn1	1.4669	6.1844	5.41053	6.71e-06	7.23e-05	3.16859
Fbxw7	0.874061	6.60123	5.41014	6.72e-06	7.24e-05	3.13913
Cspg5	0.643778	9.52305	5.40751	6.77e-06	7.29e-05	3.07809
Ralyl	1.05157	6.62759	5.4062	6.8e-06	7.3e-05	3.12505
Creg1	-1.4664	3.13151	-5.40613	6.8e-06	7.3e-05	3.50047
Aass	-1.66391	0.941096	-5.40598	6.8e-06	7.3e-05	3.68633
Arih2	-0.747349	5.5001	-5.40482	6.82e-06	7.32e-05	3.20057
Fbxo36	-1.39456	2.8293	-5.4026	6.87e-06	7.36e-05	3.50825
Abl2	-0.802653	5.37862	-5.40156	6.89e-06	7.38e-05	3.19487
Ak3	-0.808698	6.81049	-5.40004	6.92e-06	7.4e-05	3.1117
Foxc1	-1.96227	1.90882	-5.39988	6.92e-06	7.4e-05	3.63832
Dlec1	-1.61494	2.0368	-5.39703	6.98e-06	7.46e-05	3.54839
Nupr1	-1.95166	1.6147	-5.39541	7.01e-06	7.49e-05	3.61808
Ccrl2	-1.57504	-0.357329	-5.39515	7.02e-06	7.49e-05	3.69116
Tmem150cos	1.6821	0.83707	5.39382	7.04e-06	7.51e-05	3.64228
Nploc4	-0.71363	6.7998	-5.38838	7.15e-06	7.62e-05	3.07501
C2	-1.57603	-0.396725	-5.38711	7.18e-06	7.64e-05	3.6779
Ovol2	1.89009	0.125085	5.38669	7.19e-06	7.65e-05	3.6679
Epha10	1.2905	3.24817	5.38645	7.19e-06	7.65e-05	3.38659
Zfp39	1.0272	4.51345	5.38566	7.21e-06	7.66e-05	3.30147
Slc27a3	1.03182	3.78198	5.38261	7.27e-06	7.72e-05	3.34719
Tril	0.877488	5.73461	5.38054	7.32e-06	7.76e-05	3.1184
Leng9	1.15143	2.60875	5.38032	7.32e-06	7.76e-05	3.51616
Tanc1	-1.45275	3.70061	-5.37916	7.34e-06	7.78e-05	3.35196
Arvcf	-0.77338	6.61112	-5.37656	7.4e-06	7.83e-05	3.05215
Stc1	0.766757	4.34426	5.37593	7.41e-06	7.84e-05	3.20524
B4galnt1	1.09405	6.27449	5.37271	7.48e-06	7.91e-05	3.05729
Vash1	0.895522	6.30434	5.37201	7.5e-06	7.92e-05	3.06176
Nov	1.36919	7.5427	5.37156	7.51e-06	7.92e-05	2.99841
Psg16	1.43628	2.15424	5.37066	7.52e-06	7.93e-05	3.50496
Lyl1	-1.9012	0.0132625	-5.36928	7.55e-06	7.96e-05	3.61615
Porcn	0.949147	5.57281	5.36652	7.61e-06	8.02e-05	3.07581
Col12a1	-2.18564	2.61707	-5.36561	7.63e-06	8.03e-05	3.41185
Lair1	-1.70305	2.98516	-5.36548	7.64e-06	8.03e-05	3.40685
Cast	-1.51198	2.85317	-5.36362	7.68e-06	8.07e-05	3.42516
Lsamp	0.726127	8.92357	5.36266	7.7e-06	8.08e-05	2.95776
BC031181	0.927169	7.27091	5.36138	7.73e-06	8.11e-05	2.98729
Hcrtr1	1.63924	0.909343	5.3609	7.74e-06	8.11e-05	3.53306
Vamp4	0.74977	5.87201	5.36039	7.75e-06	8.12e-05	3.03782
Knstrn	-1.18028	3.77814	-5.35731	7.82e-06	8.18e-05	3.30128
Abce1	0.704588	7.31908	5.35714	7.82e-06	8.18e-05	2.96742
Rab29	-1.86009	2.4656	-5.35362	7.9e-06	8.26e-05	3.42773
Ppp1r1a	0.823821	6.69735	5.3535	7.9e-06	8.26e-05	2.97736
Scrg1	0.896831	5.50628	5.35129	7.95e-06	8.3e-05	3.03223
Pdgfa	0.777838	5.78328	5.35078	7.97e-06	8.3e-05	3.00796
Cd82	-1.54652	2.47863	-5.35061	7.97e-06	8.3e-05	3.41335
Zhx1	-1.21402	3.48044	-5.35045	7.97e-06	8.3e-05	3.31851
Itm2c	-0.780305	9.25491	-5.34762	8.04e-06	8.37e-05	2.91037
LOC102637792	-1.2739	1.72219	-5.3443	8.11e-06	8.44e-05	3.44686
Tomm34	0.813544	6.34639	5.34207	8.17e-06	8.49e-05	2.96462
Epor	-1.74017	0.458115	-5.34071	8.2e-06	8.51e-05	3.53822
Mylk	-1.72783	1.0332	-5.33777	8.27e-06	8.58e-05	3.48518
Fbxo30	-0.989546	4.77939	-5.33727	8.28e-06	8.59e-05	3.0731
Zfp521	-0.928075	4.48363	-5.33431	8.35e-06	8.65e-05	3.10733
Mdm1	-1.11579	3.63296	-5.33421	8.35e-06	8.65e-05	3.20447
Dusp26	1.25726	5.89369	5.33382	8.36e-06	8.65e-05	2.96285
Mb	-1.64809	0.312149	-5.33182	8.41e-06	8.7e-05	3.49208
Erbb2ip	-1.35025	6.1925	-5.33126	8.42e-06	8.7e-05	2.95582
Tmem119	-1.65308	0.125015	-5.32993	8.46e-06	8.73e-05	3.51127
Chrac1	-1.14588	3.77796	-5.32791	8.5e-06	8.77e-05	3.22351
Cox10	0.861617	4.86514	5.32733	8.52e-06	8.78e-05	3.0408
Zfp933	0.889714	3.89191	5.32692	8.53e-06	8.78e-05	3.2038
Asgr1	-1.74523	0.655824	-5.32677	8.53e-06	8.78e-05	3.47608
Il18	0.783185	5.39317	5.3233	8.62e-06	8.86e-05	2.98054
Trim3	0.807168	6.642	5.32329	8.62e-06	8.86e-05	2.89012
Ino80	-0.873721	4.2645	-5.3218	8.65e-06	8.89e-05	3.0897
Msmo1	1.13205	6.51816	5.31791	8.75e-06	8.98e-05	2.86531
Tmem173	-2.05643	1.30461	-5.31665	8.78e-06	9.01e-05	3.42656
Trim41	-0.597769	6.09017	-5.31637	8.79e-06	9.01e-05	2.91172
Sumf1	-1.13039	5.25239	-5.31538	8.81e-06	9.03e-05	2.98567
Pde8a	-1.72177	0.679918	-5.3129	8.88e-06	9.09e-05	3.45012
Gramd2	1.5699	2.76217	5.31236	8.89e-06	9.1e-05	3.25825
Papola	-0.67657	7.80978	-5.30275	9.14e-06	9.34e-05	2.80204
Sypl2	1.96121	0.564042	5.30226	9.15e-06	9.35e-05	3.40963
Sdcbp	-0.710786	8.1973	-5.30197	9.16e-06	9.35e-05	2.79263
Ddias	-1.09307	2.59392	-5.29998	9.21e-06	9.4e-05	3.27221
Aacs	0.849639	6.67412	5.29826	9.26e-06	9.44e-05	2.8141
Mafk	-1.3628	3.86117	-5.29725	9.28e-06	9.46e-05	3.07693
Daw1	-1.92744	0.38031	-5.29571	9.33e-06	9.49e-05	3.41125
Lrrc46	-1.63493	2.74555	-5.29567	9.33e-06	9.49e-05	3.23468
Sqrdl	-1.37092	2.50779	-5.29373	9.38e-06	9.53e-05	3.25498
Lgr4	-1.03226	5.00826	-5.29319	9.39e-06	9.54e-05	2.92899
Ndrg2	0.712459	8.16368	5.29208	9.42e-06	9.56e-05	2.77046
Akap13	-1.24585	4.47982	-5.292	9.42e-06	9.56e-05	3.01713
Gpr139	1.82565	0.339605	5.29076	9.46e-06	9.59e-05	3.40008
Cntn3	1.44601	3.20519	5.28881	9.51e-06	9.63e-05	3.09342
Angptl2	-1.51919	1.69901	-5.28771	9.54e-06	9.66e-05	3.30488
Aldh1a1	-1.54653	3.49821	-5.28476	9.62e-06	9.73e-05	3.05713
Kcnj13	-2.1252	0.382651	-5.28346	9.66e-06	9.76e-05	3.37855
Scube1	0.968059	5.77163	5.28331	9.66e-06	9.76e-05	2.81128
Tmem74b	1.17731	2.82219	5.28296	9.67e-06	9.76e-05	3.20364
Rxra	-0.957995	5.72366	-5.28208	9.7e-06	9.77e-05	2.85756
Kcnq3	1.26456	5.98926	5.28199	9.7e-06	9.77e-05	2.79116
Mrap2	1.60184	0.88877	5.2792	9.78e-06	9.84e-05	3.32485
2610316D01Rik	1.07335	3.88824	5.27909	9.78e-06	9.84e-05	3.07174
Pcdh1	0.874029	7.36978	5.27762	9.82e-06	9.88e-05	2.74463
Cd5l	-2.15454	1.36931	-5.27554	9.88e-06	9.93e-05	3.28848
Steap4	-1.62816	-0.306218	-5.27415	9.92e-06	9.96e-05	3.3623
Kcnh2	0.988393	4.5629	5.26945	1.01e-05	0.000100895	2.92936
1700017B05Rik	-1.45538	3.5068	-5.26901	1.01e-05	0.000100935	3.08871
Tfpi	-1.52335	2.28636	-5.26882	1.01e-05	0.000100935	3.21728
Gsap	-1.22653	3.34883	-5.26678	1.01e-05	0.000101295	3.10493
Zfr2	0.907434	4.45749	5.26671	1.01e-05	0.000101295	2.9655
Kbtbd8	1.31126	2.60505	5.26668	1.01e-05	0.000101295	3.1977
Insl6	-1.9009	1.21898	-5.26661	1.01e-05	0.000101295	3.29862
Samd4	-0.911109	5.3335	-5.26619	1.01e-05	0.000101344	2.81392
Fxyd7	1.41644	6.59451	5.26528	1.02e-05	0.000101539	2.71789
Bbx	-1.15798	5.36241	-5.26497	1.02e-05	0.00010156	2.83415
Gm9861	1.63348	1.05118	5.26303	1.02e-05	0.000102055	3.29998
LOC100503338	1.90899	0.509819	5.26237	1.03e-05	0.000102175	3.31394
Ppfia3	1.05683	6.20266	5.25924	1.04e-05	0.000103023	2.7484
Sema3e	1.37867	3.43812	5.25838	1.04e-05	0.000103206	3.03204
Kif2c	-0.923902	3.46775	-5.25628	1.04e-05	0.000103757	3.03662
Gpr84	-1.84802	-0.116033	-5.25562	1.05e-05	0.00010388	3.30293
Slmo1	0.878111	6.23243	5.25443	1.05e-05	0.000104162	2.72327
Chrdl1	-1.37727	3.15925	-5.25321	1.05e-05	0.000104455	3.07206
Tbr1	1.18966	6.09139	5.25075	1.06e-05	0.000105119	2.71317
Baz1a	-1.6061	2.07508	-5.24607	1.07e-05	0.000106466	3.1575
Sestd1	0.867096	7.06421	5.24572	1.08e-05	0.000106471	2.65301
Pygl	-1.25768	2.48881	-5.2454	1.08e-05	0.000106471	3.14437
Khdrbs2	1.08806	3.81465	5.24533	1.08e-05	0.000106471	2.93135
Ulk4	-1.17648	3.30648	-5.2447	1.08e-05	0.000106588	3.015
Fcgr4	-1.69953	0.0306099	-5.24317	1.08e-05	0.000106982	3.27128
Calml4	-1.6916	0.714002	-5.24026	1.09e-05	0.000107792	3.23213
Fam162a	0.978088	6.65856	5.24006	1.09e-05	0.000107792	2.6454
Rest	-1.38562	4.01989	-5.23839	1.1e-05	0.000108233	2.93746
Tram2	-1.59791	3.30199	-5.23788	1.1e-05	0.000108316	3.06117
Arx	-0.878892	5.78403	-5.23657	1.1e-05	0.00010865	2.7353
Slc2a9	-1.6709	0.910895	-5.23567	1.11e-05	0.000108856	3.1975
Mgst3	1.09097	8.08494	5.23275	1.12e-05	0.000109655	2.59413
Cntn4	1.70625	2.0437	5.23242	1.12e-05	0.000109655	3.14888
Ybx3	0.840968	6.6166	5.2324	1.12e-05	0.000109655	2.63323
Cdk1	-0.889493	5.46158	-5.23057	1.12e-05	0.000110117	2.70424
Mal2	1.18982	5.79035	5.23045	1.12e-05	0.000110117	2.65061
Zfp185	-2.19999	1.57364	-5.22421	1.14e-05	0.000112024	3.17657
Elf4	-1.84604	0.71572	-5.2234	1.15e-05	0.00011221	3.19141
Gpsm3	-1.77008	1.75238	-5.22232	1.15e-05	0.000112481	3.10243
Zswim1	1.01755	4.43821	5.21899	1.16e-05	0.00011348	2.81629
Zfp160	0.991398	3.17737	5.21794	1.16e-05	0.000113743	2.94885
Slc25a45	-1.73581	1.28446	-5.21481	1.18e-05	0.000114688	3.15782
Ttll6	-1.79448	0.511561	-5.21406	1.18e-05	0.000114857	3.15738
Csmd2	1.01676	4.99983	5.21319	1.18e-05	0.000115067	2.7022
Lrrc73	0.927755	6.31769	5.21113	1.19e-05	0.000115666	2.5826
Agtrap	-0.955554	4.80114	-5.21062	1.19e-05	0.000115756	2.77332
Fuz	-1.70196	3.24845	-5.20885	1.2e-05	0.000116269	2.96861
Lhx9	1.49235	0.340537	5.20716	1.2e-05	0.00011675	3.18058
Snai1	-1.74194	0.654408	-5.20584	1.21e-05	0.000117115	3.16092
Cmas	0.99448	7.55452	5.20481	1.21e-05	0.0001172	2.52728
Tcirg1	-1.8305	2.81385	-5.2045	1.21e-05	0.0001172	2.97131
Rfx4	-1.29162	6.39631	-5.20443	1.21e-05	0.0001172	2.61656
Mmgt1	0.731073	6.21698	5.20441	1.21e-05	0.0001172	2.5769
Syngr2	-1.19962	3.98916	-5.2044	1.21e-05	0.0001172	2.83164
Xaf1	-2.07818	0.125622	-5.20335	1.21e-05	0.000117475	3.15548
Txndc5	-0.808909	7.01336	-5.20205	1.22e-05	0.000117825	2.5398
Dnah9	-1.84531	3.08952	-5.20184	1.22e-05	0.000117825	2.88534
Ngfrap1	0.754914	8.95205	5.19988	1.23e-05	0.000118407	2.49371
Arhgdib	-1.06388	4.67267	-5.19881	1.23e-05	0.000118691	2.67552
Zmynd11	0.649784	8.2981	5.19704	1.24e-05	0.000119214	2.49249
Tmem199	0.848257	5.44745	5.19631	1.24e-05	0.000119323	2.60467
Cog2	-0.85478	4.91631	-5.19626	1.24e-05	0.000119323	2.69524
Clvs1	0.998374	5.96992	5.19223	1.25e-05	0.000120564	2.55291
Ydjc	1.41948	3.74599	5.19217	1.25e-05	0.000120564	2.7804
Trim21	-1.84279	1.69606	-5.1919	1.26e-05	0.000120576	3.06804
Fam57b	0.867812	7.34598	5.19132	1.26e-05	0.000120602	2.49953
Pxn	-1.09122	5.1591	-5.19122	1.26e-05	0.000120602	2.67732
Srpx2	-1.86144	0.537066	-5.19113	1.26e-05	0.000120602	3.10317
Cspg4	1.17137	4.06371	5.18784	1.27e-05	0.000121661	2.73799
Cfap43	-1.80791	0.60813	-5.18641	1.28e-05	0.000122079	3.08988
Bicd1	0.992044	6.52868	5.18236	1.29e-05	0.000123419	2.51216
Trmt61a	1.85029	3.8964	5.18078	1.3e-05	0.000123857	2.82246
Lrrc36	-1.8837	0.380232	-5.18066	1.3e-05	0.000123857	3.083
Dlk2	0.95142	3.68601	5.18012	1.3e-05	0.000123966	2.74537
Prkaa1	-0.81641	5.29685	-5.17877	1.3e-05	0.000124363	2.57684
Pctp	-1.63284	0.761045	-5.1785	1.3e-05	0.000124375	3.06464
Abca9	-1.57023	0.860753	-5.1768	1.31e-05	0.000124901	3.04758
Plscr1	-1.6439	2.29202	-5.17392	1.32e-05	0.00012585	2.94002
Lypla2	0.837218	6.56878	5.17368	1.32e-05	0.000125851	2.47472
Cxcl5	-1.82571	0.483219	-5.17249	1.33e-05	0.000126197	3.06496
Epn2	0.883619	6.21845	5.17158	1.33e-05	0.000126442	2.49783
Lhx8	1.96984	1.18254	5.17115	1.33e-05	0.000126517	3.04184
Tmem130	0.991723	8.04308	5.1701	1.34e-05	0.000126813	2.42135
Adamts8	-1.23257	3.19833	-5.16631	1.35e-05	0.000128054	2.81649
Opa1	0.908004	7.11596	5.16624	1.35e-05	0.000128054	2.43187
Ecel1	1.32064	3.6787	5.16484	1.36e-05	0.00012848	2.74029
Slc16a7	1.02756	5.81538	5.16428	1.36e-05	0.000128555	2.46829
Prph	1.53935	2.62792	5.16418	1.36e-05	0.000128555	2.84722
Dazap2	-0.706854	8.28748	-5.16379	1.36e-05	0.000128613	2.40291
Lhfpl3	0.811155	6.32232	5.16188	1.37e-05	0.000129155	2.45063
Tbc1d2b	-0.870795	4.58997	-5.16183	1.37e-05	0.000129155	2.62525
Tmem196	1.25656	2.50975	5.16163	1.37e-05	0.000129155	2.88103
Selk	0.668753	8.88686	5.15885	1.38e-05	0.000130101	2.37718
Rpl41	0.752246	7.35018	5.15773	1.38e-05	0.000130435	2.4033
Cemip	-1.16093	3.68285	-5.15493	1.4e-05	0.000131382	2.70874
Zfp646	-1.10897	4.73656	-5.15474	1.4e-05	0.000131382	2.60028
Txnl4a	-0.748884	7.34948	-5.15235	1.41e-05	0.000132196	2.38466
Klhl2	0.948587	6.71366	5.15166	1.41e-05	0.000132372	2.40191
Rell2	1.05966	6.84702	5.15106	1.41e-05	0.000132513	2.39374
Uqcr10	0.841466	7.36547	5.14857	1.42e-05	0.000133375	2.3805
Tmem134	1.25984	5.5786	5.14808	1.42e-05	0.000133474	2.52798
Cntn6	1.5806	3.1627	5.1461	1.43e-05	0.000134145	2.72572
Tln1	-1.62811	5.0272	-5.14516	1.43e-05	0.000134416	2.56984
Ddx25	0.814766	5.69076	5.14385	1.44e-05	0.000134834	2.43062
A830082K12Rik	0.987575	4.62028	5.14354	1.44e-05	0.000134851	2.52612
Gm11517	-1.50852	1.70919	-5.14335	1.44e-05	0.000134851	2.90376
Cfap54	-1.95757	2.16764	-5.14168	1.45e-05	0.00013541	2.83972
Ttc23	-1.20925	3.51425	-5.14008	1.46e-05	0.000135941	2.73987
Saa3	-2.1097	-0.129737	-5.13899	1.46e-05	0.000136163	2.97638
Bnip1	0.794021	4.26181	5.13891	1.46e-05	0.000136163	2.57443
Kbtbd7	0.691374	5.95008	5.13883	1.46e-05	0.000136163	2.41493
Apoc1	-1.27831	1.52153	-5.13518	1.48e-05	0.000137505	2.89209
Kif26a	1.10341	3.56051	5.13236	1.49e-05	0.000138496	2.73005
Emid1	1.22971	3.88519	5.13222	1.49e-05	0.000138496	2.57496
Itga2	-1.72929	1.2205	-5.12887	1.5e-05	0.000139719	2.89473
Cep128	-1.42986	3.37959	-5.12865	1.5e-05	0.000139719	2.709
Cbr3	-1.28355	3.40374	-5.12829	1.51e-05	0.000139719	2.68522
Map6	0.865875	8.54858	5.12824	1.51e-05	0.000139719	2.29098
Adck3	-1.16443	3.24619	-5.12645	1.51e-05	0.000140345	2.74968
Kif3c	0.860711	8.17538	5.1259	1.52e-05	0.000140478	2.29115
Syndig1	1.28339	5.10134	5.12436	1.52e-05	0.000141005	2.42106
Spa17	-1.3293	3.47399	-5.12301	1.53e-05	0.000141461	2.65411
Man1c1	-1.24088	6.13082	-5.11868	1.55e-05	0.00014313	2.37231
Ghr	-1.2427	3.8664	-5.11764	1.55e-05	0.000143467	2.61487
Serpinb6a	-1.07208	4.94576	-5.1115	1.58e-05	0.000145917	2.41766
Npy	0.824688	7.79024	5.10873	1.59e-05	0.000146912	2.2525
Gm561	1.14493	3.28935	5.10867	1.59e-05	0.000146912	2.67935
St3gal4	0.823294	4.76681	5.10774	1.6e-05	0.000147209	2.41503
Slc25a17	0.600052	6.3284	5.10686	1.6e-05	0.000147463	2.29728
Pot1a	1.16276	4.01681	5.10669	1.6e-05	0.000147463	2.59395
Plin3	-1.49338	3.39439	-5.1032	1.62e-05	0.000148846	2.64915
Trhr	1.63182	1.25712	5.10164	1.63e-05	0.00014942	2.83616
Ptbp1	-0.987839	5.91896	-5.09882	1.64e-05	0.000150454	2.2951
Susd3	-1.47204	-0.433691	-5.09878	1.64e-05	0.000150454	2.88155
Htr2a	1.28411	3.59664	5.09632	1.65e-05	0.00015142	2.55534
Fsd1	1.03929	5.89222	5.0934	1.66e-05	0.000152593	2.28004
Cfap97	0.739714	5.22974	5.09232	1.67e-05	0.000152966	2.36048
Hras	1.0301	7.80246	5.08695	1.69e-05	0.000155235	2.18324
Kcnn2	0.975174	4.60136	5.0863	1.7e-05	0.000155425	2.39715
Lats2	-1.17671	5.4926	-5.08569	1.7e-05	0.000155526	2.31407
Lin7a	0.832	5.32699	5.08563	1.7e-05	0.000155526	2.307
Tfe3	-0.893989	4.43269	-5.08071	1.73e-05	0.000157632	2.4047
Ccng2	-0.706113	6.72232	-5.07884	1.73e-05	0.000158354	2.20597
Crtc3	-0.960633	6.02973	-5.0785	1.74e-05	0.000158354	2.2515
Slc17a7	1.62374	7.54674	5.07844	1.74e-05	0.000158354	2.16331
Mum1	0.867258	4.82267	5.07772	1.74e-05	0.000158582	2.33726
Llgl2	-1.57403	0.897082	-5.07659	1.75e-05	0.000158992	2.78134
B3gat2	1.14204	4.57341	5.07612	1.75e-05	0.000159104	2.45583
Ndst1	-0.902028	6.66172	-5.07469	1.76e-05	0.000159659	2.20393
Fam217b	0.784474	4.89138	5.07439	1.76e-05	0.000159694	2.3051
Ulk1	-0.637301	7.06087	-5.07339	1.76e-05	0.000160049	2.17151
Nfxl1	-0.885447	4.74154	-5.07315	1.76e-05	0.000160061	2.35882
Rsad1	0.995778	4.12563	5.07224	1.77e-05	0.000160373	2.44803
Nefl	1.34228	7.98487	5.07104	1.77e-05	0.000160824	2.13933
Uba7	-2.03784	0.614007	-5.06954	1.78e-05	0.000161329	2.77746
Csf2rb	-1.98582	-0.0982927	-5.0695	1.78e-05	0.000161329	2.78565
Gramd1c	-1.40125	2.03907	-5.06773	1.79e-05	0.000162049	2.6563
Plekhg2	-1.7347	3.46362	-5.06677	1.8e-05	0.000162391	2.54876
Myl12a	-0.901775	5.97938	-5.06402	1.81e-05	0.000163569	2.20835
Magohb	1.32053	3.22756	5.06147	1.82e-05	0.000164663	2.51448
Uba1	0.626615	9.81264	5.05968	1.83e-05	0.000165407	2.08115
Dusp16	-0.920036	4.48064	-5.05842	1.84e-05	0.000165898	2.32745
Smad5	-0.785079	6.8454	-5.05788	1.84e-05	0.000166053	2.145
Ppa1	0.742948	7.60521	5.05661	1.85e-05	0.000166513	2.10242
Olig1	0.721163	7.73722	5.05647	1.85e-05	0.000166513	2.10034
Aebp1	-1.81124	3.25085	-5.05592	1.85e-05	0.00016667	2.57907
Fra10ac1	0.858674	4.62248	5.05529	1.86e-05	0.000166868	2.28297
Tcp11	-1.41867	2.56633	-5.05477	1.86e-05	0.000167012	2.57569
Ipcef1	1.28847	4.5171	5.04934	1.89e-05	0.00016952	2.26928
Ccdc81	-1.49404	1.19461	-5.04382	1.92e-05	0.000172109	2.67435
Pcf11	-0.857017	5.08223	-5.04218	1.93e-05	0.00017272	2.22298
Lrp1b	1.42221	3.22117	5.04214	1.93e-05	0.00017272	2.44165
Cnst	0.800049	4.93341	5.04091	1.93e-05	0.000173224	2.2591
Dnah1	-1.60498	0.0377017	-5.04019	1.94e-05	0.000173471	2.70792
Zfp568	-1.69205	2.00406	-5.03894	1.94e-05	0.000173984	2.58053
Atl1	1.02567	6.68991	5.03827	1.95e-05	0.000174208	2.07758
Tfap2a	-1.48066	0.099646	-5.03695	1.96e-05	0.00017476	2.70509
Rai2	-1.2385	2.62647	-5.03653	1.96e-05	0.000174863	2.53001
Ttc16	-1.68007	1.36898	-5.03479	1.97e-05	0.000175627	2.62504
Gap43	1.04193	10.4751	5.03095	1.99e-05	0.000177453	1.99259
Larp6	0.903736	5.00235	5.02951	2e-05	0.000178077	2.17257
Mmd2	0.73879	9.08087	5.02918	2e-05	0.000178131	2.0097
Fdft1	0.942673	8.00149	5.02786	2.01e-05	0.000178697	2.01024
Zfp184	1.02054	3.64843	5.02658	2.01e-05	0.00017924	2.36136
Rhobtb1	1.5242	2.80656	5.02527	2.02e-05	0.0001798	2.51785
Tmem251	-0.925702	4.2059	-5.0248	2.02e-05	0.000179931	2.25576
Far2	1.50817	3.56449	5.02285	2.04e-05	0.000180828	2.32082
Slc7a7	-1.64272	1.56845	-5.0217	2.04e-05	0.000181249	2.57552
Naip2	-1.7082	0.42749	-5.02153	2.04e-05	0.000181249	2.63282
Golga7b	0.982729	5.55117	5.02139	2.04e-05	0.000181249	2.08221
Cnnm1	1.24449	3.6195	5.02067	2.05e-05	0.00018151	2.30593
Naa20	1.79947	3.71341	5.02035	2.05e-05	0.000181561	2.3062
Cd300lb	-1.62591	-0.159108	-5.01828	2.06e-05	0.000182527	2.65245
Zdhhc23	0.93185	4.33188	5.01565	2.08e-05	0.000183792	2.22576
Mapk11	0.964098	4.05518	5.01518	2.08e-05	0.000183925	2.24332
Ptprm	-0.891554	6.02469	-5.01311	2.09e-05	0.000184904	2.05707
Tmbim1	-1.24633	3.79917	-5.01232	2.1e-05	0.00018521	2.34298
Clgn	1.18873	3.83435	5.01143	2.1e-05	0.000185566	2.26656
Gpsm2	-0.781544	4.11306	-5.01034	2.11e-05	0.000186031	2.25167
Gtf2ird1	-0.641241	5.69146	-5.00983	2.11e-05	0.000186192	2.05832
Gmcl1	0.712621	6.06442	5.00573	2.14e-05	0.000188268	2.02378
Pear1	-1.859	0.671649	-5.00543	2.14e-05	0.000188314	2.60927
Fbxo27	1.79125	0.987622	5.00313	2.15e-05	0.000189445	2.55913
Fndc3b	-0.883329	5.48339	-5.00263	2.16e-05	0.000189596	2.07527
P2rx4	-1.62933	2.00207	-5.00222	2.16e-05	0.000189703	2.49494
Gm16675	-1.48779	0.222886	-4.9989	2.18e-05	0.000191397	2.59311
Psma4	0.688484	7.42416	4.99578	2.2e-05	0.000192992	1.93555
Idh1	0.782946	8.49132	4.99391	2.21e-05	0.000193841	1.91076
P2rx6	-1.97672	2.17832	-4.99365	2.21e-05	0.000193841	2.46841
Slk	-0.76114	5.76981	-4.99361	2.21e-05	0.000193841	2.01219
Atp5j2	0.725745	8.85711	4.99056	2.23e-05	0.000195421	1.89842
Sun2	-0.866003	5.71711	-4.98738	2.25e-05	0.000197083	2.04725
Susd6	-1.02357	5.54263	-4.9866	2.26e-05	0.000197401	2.02016
Gm19705	-1.62826	1.0648	-4.98535	2.27e-05	0.000197989	2.50251
Coa4	1.35566	1.87157	4.98497	2.27e-05	0.000197989	2.48869
Trim34a	-1.78592	0.589966	-4.98493	2.27e-05	0.000197989	2.55141
Atg9b	1.34868	2.53277	4.98396	2.28e-05	0.000198351	2.34879
Nefh	1.5664	3.01966	4.98386	2.28e-05	0.000198351	2.30419
Tmem240	1.00495	5.06225	4.98328	2.28e-05	0.000198563	2.03297
Mvd	1.68297	5.78462	4.98182	2.29e-05	0.00019927	1.95646
Asic2	1.19356	5.59597	4.98156	2.29e-05	0.000199299	1.98894
Bcl6b	1.83264	1.35814	4.98093	2.3e-05	0.00019943	2.44756
Hilpda	0.967706	3.44192	4.9809	2.3e-05	0.00019943	2.27695
Npnt	-0.779521	5.52158	-4.97996	2.3e-05	0.000199847	1.98183
Bambi	-1.19076	3.91368	-4.97901	2.31e-05	0.000200272	2.18656
Ube2u	-1.29473	0.028999	-4.97849	2.31e-05	0.000200445	2.5418
Kif18a	-1.55672	1.21067	-4.97819	2.31e-05	0.0002005	2.48009
Prr16	1.29315	3.25878	4.97293	2.35e-05	0.000203412	2.22465
Lin28b	1.13247	2.21931	4.97158	2.36e-05	0.000204074	2.38768
Hs3st2	1.28885	4.74706	4.96772	2.38e-05	0.000206218	2.01207
Sgk1	-1.07045	5.7419	-4.96702	2.39e-05	0.000206505	1.93338
Mob3b	-1.47117	3.19724	-4.96627	2.39e-05	0.000206778	2.28064
Gpx8	-1.3536	4.81221	-4.96614	2.39e-05	0.000206778	2.05042
Cln8	-0.740708	6.26105	-4.96583	2.4e-05	0.000206836	1.90298
Zdhhc20	-0.646252	5.68976	-4.96549	2.4e-05	0.000206914	1.93431
Gmfb	-0.731436	7.17015	-4.96456	2.41e-05	0.00020723	1.8583
2610203C22Rik	-1.92243	0.621739	-4.96453	2.41e-05	0.00020723	2.47403
Zbtb4	0.829081	5.54535	4.96415	2.41e-05	0.000207335	1.9612
Per3	-1.21803	3.03414	-4.96381	2.41e-05	0.00020741	2.31712
Zfp354c	0.759414	7.15358	4.96216	2.42e-05	0.000208265	1.86114
Ttll8	-1.4594	0.760669	-4.96194	2.42e-05	0.000208272	2.46873
Vgf	1.28265	5.46986	4.9613	2.43e-05	0.000208531	1.95898
Auts2	-1.0549	5.21943	-4.95784	2.45e-05	0.000210366	1.9609
9230114K14Rik	-1.31915	2.31406	-4.95781	2.45e-05	0.000210366	2.35187
Inppl1	-1.17617	5.23041	-4.95658	2.46e-05	0.000210986	1.97749
Morn3	-1.66408	0.710499	-4.95631	2.46e-05	0.000211017	2.44359
1110008P14Rik	0.866139	6.79493	4.95587	2.47e-05	0.00021116	1.83963
Rc3h1	-0.936617	6.67053	-4.95553	2.47e-05	0.000211236	1.84821
Usp43	1.06738	3.22131	4.95489	2.47e-05	0.000211498	2.1765
Cldn9	-1.39809	0.225406	-4.95228	2.49e-05	0.000212956	2.46946
Pbx2	0.664768	5.65802	4.9505	2.5e-05	0.00021387	1.89881
Asah2	-1.41052	2.66624	-4.95037	2.5e-05	0.00021387	2.29771
Fbxo2	-1.0037	6.60966	-4.94955	2.51e-05	0.000214242	1.84746
Vwa5a	-1.33635	5.28041	-4.94714	2.53e-05	0.000215595	1.99034
Pla2g5	-1.64444	2.18657	-4.94292	2.56e-05	0.000217968	2.3025
Ccnj	0.955286	4.07363	4.9429	2.56e-05	0.000217968	2.07994
Gpr176	1.31688	2.72301	4.94214	2.56e-05	0.00021831	2.21358
Ripk3	-1.50763	-0.175003	-4.9419	2.57e-05	0.000218329	2.438
Tmem106c	-0.784294	5.71058	-4.9394	2.58e-05	0.000219767	1.88832
Zfp133-ps	1.37888	2.16973	4.93824	2.59e-05	0.000220365	2.30838
Fam43a	-1.10824	2.95438	-4.93641	2.61e-05	0.000221329	2.26298
Zfp853	1.34657	2.34319	4.9363	2.61e-05	0.000221329	2.29664
Efcab11	-1.53901	2.31134	-4.93402	2.62e-05	0.00022264	2.28911
Ncor1	0.844552	8.27783	4.93359	2.63e-05	0.000222784	1.74643
Slc38a3	-0.828983	7.07893	-4.93294	2.63e-05	0.000222902	1.77425
Ppfia4	1.20103	5.59755	4.93287	2.63e-05	0.000222902	1.84472
Dok5	0.809767	6.48774	4.93279	2.63e-05	0.000222902	1.77734
Slc6a7	1.56401	4.42833	4.93167	2.64e-05	0.00022344	1.91816
A930033H14Rik	1.47391	1.46148	4.93153	2.64e-05	0.00022344	2.36046
Zfp385b	0.943911	4.25393	4.92927	2.66e-05	0.000224754	2.02684
St8sia3	0.926043	7.33005	4.92314	2.71e-05	0.000228592	1.73481
Nmt1	-0.579712	6.92213	-4.92169	2.72e-05	0.000229405	1.74611
Cdkl2	1.11718	5.3086	4.92094	2.72e-05	0.000229764	1.80149
Sesn1	-0.740015	5.28524	-4.91913	2.74e-05	0.000230817	1.85578
Spryd7	0.78753	6.21615	4.91881	2.74e-05	0.000230893	1.76092
Dcaf12l1	1.09159	4.22994	4.91751	2.75e-05	0.000231594	1.96161
Evl	0.660416	8.55877	4.91734	2.75e-05	0.000231594	1.6935
Aldoc	0.644273	9.79054	4.91693	2.76e-05	0.000231734	1.68028
Zfp72	1.19941	2.67673	4.91664	2.76e-05	0.000231788	2.20885
Usp53	-1.32342	4.59794	-4.9117	2.8e-05	0.000234947	1.90805
Slc7a11	-1.38103	5.06006	-4.91147	2.8e-05	0.00023496	1.85059
Bend6	0.860929	7.08372	4.90968	2.81e-05	0.000236028	1.69314
Ttc12	-1.55544	2.38271	-4.90943	2.82e-05	0.000236063	2.16944
Cd276	0.618658	6.28583	4.90658	2.84e-05	0.000237854	1.73442
Riiad1	-1.43649	2.59959	-4.90519	2.85e-05	0.000238661	2.1645
Fhl3	-1.46634	2.17857	-4.90344	2.86e-05	0.000239715	2.21887
Fkbp10	-1.07813	4.45298	-4.90236	2.87e-05	0.000240312	1.96254
Laptm4a	-1.02886	9.23761	-4.89936	2.9e-05	0.000242243	1.63653
Dnah12	-1.61072	0.393227	-4.89762	2.91e-05	0.000243308	2.30059
Bnip3	1.49122	6.46238	4.89686	2.92e-05	0.000243627	1.67366
Tbpl1	0.912635	6.11308	4.89675	2.92e-05	0.000243627	1.72368
Ppp1r11	0.639082	7.1044	4.89548	2.93e-05	0.000244371	1.66516
Dok1	-1.6676	1.67865	-4.89528	2.93e-05	0.000244371	2.24587
Foxp1	0.837315	6.78034	4.89486	2.94e-05	0.000244524	1.6678
Cdh18	1.49169	2.83806	4.88919	2.98e-05	0.000248372	2.03868
Mgat1	-1.70795	3.38081	-4.88776	3e-05	0.000249083	2.02879
Fscn1	0.824296	8.01778	4.88769	3e-05	0.000249083	1.62369
Fam234a	-0.96717	5.66649	-4.88758	3e-05	0.000249083	1.74352
Egr2	1.65202	1.11515	4.88305	3.04e-05	0.000252183	2.19804
Ccdc162	-1.5228	0.507918	-4.88078	3.06e-05	0.000253675	2.25024
Ccna1	-1.74181	0.45198	-4.88055	3.06e-05	0.000253694	2.22947
Mlf1	-1.20351	3.21768	-4.87015	3.15e-05	0.000261132	1.95007
Fam163b	0.902112	6.26592	4.87003	3.15e-05	0.000261132	1.617
Fam189a2	-1.07976	4.64411	-4.86977	3.15e-05	0.000261172	1.82408
Wdr66	-1.25349	2.97327	-4.86683	3.18e-05	0.00026322	1.93915
Ppic	-1.20956	4.72095	-4.86407	3.21e-05	0.000265155	1.78538
Dnttip2	-0.698142	5.22097	-4.86382	3.21e-05	0.000265191	1.6834
Rb1cc1	-0.788669	5.58265	-4.86219	3.22e-05	0.000266076	1.63957
Cd44	-1.33279	4.68539	-4.86209	3.22e-05	0.000266076	1.73853
Hmcn1	-1.78053	0.56171	-4.86205	3.22e-05	0.000266076	2.21641
Pon2	-0.838658	5.87189	-4.86079	3.24e-05	0.000266882	1.64936
Rapgef3	-1.39338	4.25381	-4.85959	3.25e-05	0.000267576	1.88788
Fam19a4	1.26795	-0.209651	4.85947	3.25e-05	0.000267576	2.22318
Sall2	-1.19432	4.92689	-4.858	3.26e-05	0.000268552	1.79612
Mycn	1.0243	4.63327	4.85773	3.26e-05	0.000268604	1.73135
Tspyl2	0.958354	6.13173	4.85734	3.27e-05	0.000268748	1.61091
Ccdc136	0.741601	5.72944	4.8558	3.28e-05	0.000269777	1.61542
Zfas1	-0.971264	4.55067	-4.85467	3.29e-05	0.000270499	1.75714
Pkn2	-1.08281	4.92666	-4.85305	3.31e-05	0.000271597	1.69578
Fbxl19	0.758614	6.33296	4.85254	3.31e-05	0.000271834	1.58239
Polr2g	0.719946	7.51928	4.85117	3.33e-05	0.000272743	1.52931
Spdef	-1.4594	-0.0716039	-4.84748	3.36e-05	0.000275475	2.17588
Gm20594	1.49351	4.94656	4.84585	3.38e-05	0.000276604	1.64338
Lrwd1	-0.97324	3.78441	-4.84515	3.38e-05	0.000276995	1.85347
Tprkb	-1.07583	4.74911	-4.84426	3.39e-05	0.000277544	1.69458
AI464131	0.817841	5.01789	4.84364	3.4e-05	0.000277873	1.68287
Dram2	0.795252	6.00425	4.8407	3.43e-05	0.000280061	1.55771
A730017C20Rik	1.37527	3.62415	4.8401	3.43e-05	0.000280384	1.87524
Ccdc184	1.10165	4.37845	4.83954	3.44e-05	0.000280672	1.66982
Mras	0.69331	7.52055	4.83765	3.46e-05	0.000282026	1.48872
Tekt4	-1.56764	0.568778	-4.83726	3.46e-05	0.000282179	2.10664
D8Ertd82e	-1.01303	6.06371	-4.83647	3.47e-05	0.000282658	1.58154
Psme4	-0.617766	6.12669	-4.83457	3.49e-05	0.000284036	1.5265
Il1rapl1	0.81591	4.46142	4.83435	3.49e-05	0.000284051	1.7101
Dag1	-0.866473	8.7497	-4.83326	3.5e-05	0.00028458	1.45722
Zmynd10	-1.28837	2.30935	-4.83324	3.5e-05	0.00028458	1.94936
Aff1	-1.79485	3.79626	-4.833	3.5e-05	0.00028458	1.85161
Ddit4	1.16135	7.4579	4.8329	3.5e-05	0.00028458	1.48908
Rhoj	-1.14652	3.22248	-4.83211	3.51e-05	0.000285064	1.89787
Ell	-0.775167	5.26016	-4.83167	3.52e-05	0.000285264	1.61541
Selm	0.932129	6.02577	4.8309	3.52e-05	0.00028573	1.52013
Gm20939	1.44773	1.59709	4.83048	3.53e-05	0.000285778	2.03976
Dctd	0.903144	4.6497	4.83044	3.53e-05	0.000285778	1.67915
Wdr25	-1.01502	3.20519	-4.82953	3.54e-05	0.000286357	1.90036
Akirin2	0.587464	7.57524	4.82921	3.54e-05	0.000286404	1.46411
Vav3	-1.3252	3.02835	-4.82908	3.54e-05	0.000286404	1.88564
Smyd2	0.960461	6.52961	4.82872	3.55e-05	0.000286539	1.49076
Frrs1l	0.725975	6.58548	4.82635	3.57e-05	0.000288326	1.48028
Snx9	-1.73276	3.59615	-4.82393	3.59e-05	0.000290157	1.81708
Osbpl6	0.704662	5.05651	4.8194	3.64e-05	0.00029377	1.5928
Rxrg	1.16245	3.07436	4.81643	3.67e-05	0.000296099	1.86389
Ckmt1	0.949742	5.69912	4.81579	3.68e-05	0.000296473	1.47973
AI413582	0.691572	6.4412	4.81509	3.69e-05	0.0002969	1.45754
Rnmtl1	0.934584	3.87207	4.81457	3.69e-05	0.000297179	1.73463
Syt9	0.870847	4.65831	4.81434	3.69e-05	0.000297206	1.61897
Gm12371	1.38595	2.33967	4.81408	3.7e-05	0.000297255	1.9014
Pkig	0.670109	6.8977	4.81305	3.71e-05	0.000297966	1.43428
Ifngr1	-0.955022	5.17165	-4.81243	3.71e-05	0.000298326	1.55618
Sncb	1.12902	8.54776	4.81082	3.73e-05	0.000299536	1.39003
Cdyl2	1.00822	4.3202	4.81038	3.74e-05	0.000299742	1.63075
Lin7b	0.925415	4.98844	4.80927	3.75e-05	0.000300528	1.51395
Rhpn1	-1.17173	4.03414	-4.80845	3.76e-05	0.000301065	1.70498
Arhgap31	-1.09417	4.86647	-4.80784	3.76e-05	0.000301415	1.60938
Nup205	-0.845358	5.02429	-4.80649	3.78e-05	0.000302414	1.55665
Aebp2	-0.945397	5.46939	-4.80379	3.81e-05	0.000304584	1.49043
Slc44a5	-0.814188	4.25494	-4.80296	3.82e-05	0.000305135	1.6539
Ankrd11	-0.742837	6.67853	-4.79593	3.89e-05	0.000311138	1.4024
Cdh9	1.53857	3.11403	4.79494	3.9e-05	0.000311844	1.77643
Tex30	-0.949601	3.36869	-4.79424	3.91e-05	0.000312298	1.69439
Lrrc1	-1.02036	3.76806	-4.7911	3.95e-05	0.000314652	1.69709
Psd	0.799237	7.476	4.79103	3.95e-05	0.000314652	1.36219
Ccdc28b	0.905928	6.5143	4.79102	3.95e-05	0.000314652	1.38857
Ctso	-1.12852	5.12271	-4.78999	3.96e-05	0.000315399	1.53028
Dimt1	0.887	4.37302	4.78916	3.97e-05	0.000315975	1.59892
Wasf1	0.859627	9.2799	4.78841	3.98e-05	0.000316477	1.31931
Psmb9	-1.64423	0.478172	-4.78732	3.99e-05	0.000317284	2.00005
Drd2	1.05093	4.15825	4.78636	4e-05	0.000317983	1.6441
Fam92b	-1.82916	0.424389	-4.78262	4.04e-05	0.00032121	1.96768
Zmynd8	0.610951	6.67439	4.78146	4.06e-05	0.000322095	1.36269
Magee1	0.600924	7.48664	4.78008	4.07e-05	0.000323188	1.3237
Tubb3	1.00182	10.9102	4.77962	4.08e-05	0.000323437	1.27975
Arhgef5	-1.4205	0.358944	-4.77907	4.08e-05	0.000323767	1.98687
Sfrp1	-1.16523	5.17832	-4.77815	4.1e-05	0.000324437	1.47433
Dgkq	0.860535	5.21847	4.77733	4.11e-05	0.000325016	1.46533
Col6a3	-1.8259	1.01772	-4.77662	4.11e-05	0.000325494	1.93504
Glrb	0.774177	6.78965	4.77626	4.12e-05	0.00032565	1.33135
Nenf	0.79757	6.80901	4.77502	4.13e-05	0.000326614	1.33105
Naalad2	-1.69875	-0.00798867	-4.77484	4.13e-05	0.000326614	1.97786
F630040K05Rik	1.91503	0.477722	4.77443	4.14e-05	0.000326816	1.95511
Desi2	-0.697147	4.62103	-4.77412	4.14e-05	0.000326928	1.49169
Tnni3	-1.58092	0.189475	-4.77029	4.19e-05	0.000330328	1.96803
Gria2	0.729797	8.90974	4.76918	4.2e-05	0.0003312	1.27291
Tspan5	0.696737	7.30582	4.76849	4.21e-05	0.000331671	1.29197
Zfp958	1.00599	4.30399	4.7672	4.23e-05	0.000332712	1.58434
Slfn5	-1.7438	-0.162032	-4.76699	4.23e-05	0.000332726	1.95725
Ccdc114	-2.00576	1.36543	-4.76579	4.24e-05	0.000333679	1.88674
Arhgap17	-0.93677	4.34481	-4.76482	4.25e-05	0.000334426	1.53504
Smo	-0.99942	6.31517	-4.76415	4.26e-05	0.000334878	1.35403
Gprin3	1.12845	3.21652	4.76373	4.27e-05	0.0003351	1.69728
Nr3c1	-1.13852	5.42203	-4.76196	4.29e-05	0.000336611	1.39381
Rassf9	-1.47281	0.155998	-4.7592	4.32e-05	0.000339081	1.93749
Rap1gds1	0.701914	6.96493	4.75887	4.33e-05	0.000339217	1.2806
Sema4f	0.960753	5.56652	4.7569	4.35e-05	0.000340942	1.34785
Abcg4	0.722231	5.62884	4.75599	4.36e-05	0.000341637	1.34433
Pvr	-0.868089	4.01247	-4.75479	4.38e-05	0.000342618	1.50127
Ifi27l2a	-1.55541	-0.225382	-4.75293	4.4e-05	0.000344259	1.91878
Tesk1	0.771617	7.34995	4.75081	4.43e-05	0.000346157	1.25387
C1qtnf6	-1.2653	4.24829	-4.75048	4.43e-05	0.000346292	1.50784
Meg3	1.08145	8.91834	4.75028	4.43e-05	0.000346303	1.21926
Atxn7l3	0.847766	8.23462	4.74952	4.44e-05	0.000346859	1.22524
Tab2	-0.771492	6.87073	-4.74861	4.46e-05	0.000347579	1.26556
Rwdd2a	1.23658	3.38052	4.74766	4.47e-05	0.000348332	1.62118
Dusp15	0.963062	4.06048	4.74685	4.48e-05	0.000348935	1.52719
Lrrc16b	0.772144	5.25185	4.74663	4.48e-05	0.000348935	1.36315
Stmn4	0.882876	7.43421	4.74648	4.48e-05	0.000348935	1.2293
Nf2	0.869408	7.20177	4.74591	4.49e-05	0.00034931	1.25738
Aifm2	-1.11254	2.97858	-4.74519	4.5e-05	0.00034984	1.6839
Cmpk1	0.785854	7.02907	4.74415	4.51e-05	0.000350687	1.23879
Nuak2	-1.85051	3.89459	-4.74269	4.53e-05	0.00035175	1.62021
Sh3bgrl	-0.677589	7.78018	-4.74259	4.53e-05	0.00035175	1.21926
Zfp667	-0.87388	4.16049	-4.74252	4.53e-05	0.00035175	1.48403
Klf7	0.980357	7.02952	4.74001	4.57e-05	0.00035408	1.22577
Cyp4x1	1.09746	4.48598	4.73899	4.58e-05	0.000354748	1.4012
Top1	0.876359	7.87346	4.73897	4.58e-05	0.000354748	1.20432
Nkd2	0.998902	4.46563	4.73876	4.58e-05	0.000354778	1.44076
Lmo1	1.15999	5.83205	4.73855	4.58e-05	0.000354793	1.26888
Nlrc3	-1.67541	0.631463	-4.73793	4.59e-05	0.000355226	1.85097
Sh2d5	1.33388	3.42463	4.73486	4.63e-05	0.000358156	1.54008
Zik1	0.677186	5.06675	4.73467	4.64e-05	0.000358164	1.37231
Lrrc55	0.976599	5.39485	4.73409	4.64e-05	0.000358554	1.29695
Rras	-1.17161	3.48447	-4.73248	4.66e-05	0.000360014	1.57247
Ccdc112	1.15375	3.72909	4.73122	4.68e-05	0.000361116	1.50624
Dnaja3	0.703109	6.32406	4.73093	4.69e-05	0.000361216	1.23313
Xrn1	1.2362	2.84791	4.73056	4.69e-05	0.000361405	1.62755
Shtn1	0.83338	7.30517	4.73036	4.69e-05	0.000361415	1.1862
Epb41l4b	-0.867972	3.01812	-4.72893	4.71e-05	0.000362702	1.59656
Ddx55	0.817548	5.13364	4.72801	4.72e-05	0.000363459	1.3252
Mrps6	-0.868808	4.94722	-4.72721	4.74e-05	0.000364093	1.3402
Gng3	1.07781	8.26655	4.72641	4.75e-05	0.000364726	1.15967
Dtd1	0.743929	6.94382	4.72328	4.79e-05	0.000367797	1.18456
Grid2	0.965026	4.23173	4.71722	4.87e-05	0.000373999	1.39802
Psat1	-0.650219	7.81637	-4.71685	4.88e-05	0.000374199	1.14373
Cxxc1	-1.19785	3.7735	-4.71319	4.93e-05	0.000377867	1.45139
Cbln4	1.43314	3.15759	4.71305	4.93e-05	0.000377867	1.54275
Chrna3	1.31117	2.27242	4.71262	4.94e-05	0.000378122	1.63124
Atg14	-0.790875	5.29743	-4.71231	4.94e-05	0.00037826	1.24809
Hmgcll1	0.872998	3.84356	4.71059	4.97e-05	0.000379918	1.42353
Cela1	-1.656	0.508713	-4.70878	4.99e-05	0.000381673	1.78886
Nelfa	0.742233	5.59076	4.70735	5.01e-05	0.000383032	1.2227
Iglon5	0.666895	6.71744	4.70695	5.02e-05	0.000383255	1.14628
Tctex1d4	-1.40065	0.324554	-4.70612	5.03e-05	0.000383965	1.76109
BC037034	0.844967	6.89644	4.70435	5.05e-05	0.000385693	1.129
Vash2	0.665431	5.63271	4.7018	5.09e-05	0.000388304	1.19733
2900055J20Rik	0.986103	4.16007	4.70087	5.1e-05	0.000389122	1.31612
Zfp811	1.03577	4.23632	4.69772	5.15e-05	0.000392426	1.39994
Smim12	1.21796	4.06035	4.69746	5.15e-05	0.000392504	1.43958
Hspe1	0.558847	7.95559	4.69629	5.17e-05	0.000393612	1.08062
Aox1	-1.34063	2.67558	-4.69402	5.21e-05	0.000395953	1.571
2700094K13Rik	1.1404	5.70122	4.69278	5.22e-05	0.000397061	1.17727
Ptbp2	0.674595	8.36858	4.69264	5.23e-05	0.000397061	1.0622
Ephx4	1.30355	3.24188	4.69248	5.23e-05	0.000397061	1.46185
Slc6a13	-1.66398	1.48383	-4.69222	5.23e-05	0.000397145	1.69206
Klhl24	-0.780394	6.42028	-4.69174	5.24e-05	0.000397473	1.11432
Aldh18a1	0.559157	5.70214	4.68679	5.31e-05	0.0004029	1.15358
Zc2hc1a	0.85193	6.12873	4.6852	5.34e-05	0.000404519	1.11566
Lrrc56	-0.905064	3.91902	-4.68343	5.36e-05	0.000406285	1.34788
Frs2	-1.00525	5.75407	-4.6833	5.37e-05	0.000406285	1.15216
Zmpste24	-0.653436	6.13206	-4.68204	5.39e-05	0.000407525	1.10959
Brip1os	-0.704269	6.13946	-4.68172	5.39e-05	0.000407689	1.11706
Mpp2	0.718503	5.34477	4.67735	5.46e-05	0.000412466	1.14861
Plgrkt	0.740159	5.48977	4.67722	5.46e-05	0.000412466	1.14005
Jag2	0.817365	4.30253	4.67707	5.46e-05	0.000412466	1.26763
Abhd14b	-1.26305	2.74896	-4.6764	5.47e-05	0.000413035	1.51595
Pla2g4a	-1.78298	1.43252	-4.6754	5.49e-05	0.000413993	1.66012
Arid5b	-1.01635	5.48497	-4.6746	5.5e-05	0.000414716	1.11403
Megf10	-1.2696	5.10983	-4.67421	5.51e-05	0.000414962	1.19206
Tead1	-1.33258	4.91053	-4.67388	5.51e-05	0.00041514	1.22333
Camk4	0.89289	6.56444	4.67365	5.52e-05	0.000415187	1.04694
Ripply2	1.78001	1.9587	4.67297	5.53e-05	0.00041572	1.60863
Dmrta1	1.57598	0.935979	4.67278	5.53e-05	0.00041572	1.65373
LOC108167848	1.14857	3.35124	4.67265	5.53e-05	0.00041572	1.49542
Zim1	1.24104	2.81232	4.67075	5.56e-05	0.000417753	1.48583
Kcnd1	0.806016	4.27871	4.67006	5.57e-05	0.000418263	1.23628
Syap1	-0.671788	7.03138	-4.66996	5.57e-05	0.000418263	1.02818
Bcam	-1.39573	3.20259	-4.66873	5.59e-05	0.000419508	1.44928
Akap10	-0.747226	4.75547	-4.6663	5.63e-05	0.000422196	1.1867
Lpar6	-1.5351	2.86092	-4.66462	5.66e-05	0.000424001	1.47515
Larp4	-0.667845	6.30738	-4.66331	5.68e-05	0.000425364	1.03912
Mllt3	0.60401	6.44467	4.66181	5.7e-05	0.000426959	1.03857
Chd5	0.668013	7.51119	4.66116	5.72e-05	0.000427528	0.990613
Arhgef6	-1.4932	3.31023	-4.66094	5.72e-05	0.000427565	1.41195
Arhgap33	0.822101	7.5749	4.66051	5.73e-05	0.000427872	0.988458
Gale	1.01621	3.90279	4.66022	5.73e-05	0.000427982	1.28549
Abca1	-1.58935	7.81485	-4.66005	5.73e-05	0.000427982	0.989739
Adam17	-1.19783	3.74209	-4.65953	5.74e-05	0.000428398	1.3081
Cabin1	0.603532	5.93923	4.6581	5.77e-05	0.000429921	1.05654
Fam118b	0.642076	5.26426	4.65732	5.78e-05	0.000430656	1.09389
Ccdc106	0.856385	5.25	4.65645	5.79e-05	0.00043142	1.10641
Xrcc6	0.727487	4.89995	4.65633	5.79e-05	0.00043142	1.16446
Cldnd1	0.681938	7.57843	4.65382	5.84e-05	0.000434229	0.972596
Agfg2	0.754159	4.88887	4.65368	5.84e-05	0.000434229	1.122
Rasal1	1.37094	3.37061	4.65301	5.85e-05	0.000434834	1.32037
Nkain1	0.531219	8.03866	4.65275	5.85e-05	0.000434932	0.957279
Plppr2	0.865257	8.48699	4.65223	5.86e-05	0.000435349	0.950354
Gm20491	1.92837	0.909459	4.65193	5.87e-05	0.000435402	1.57043
Map4k4	-0.595921	8.47364	-4.65183	5.87e-05	0.000435402	0.950254
Sqstm1	-0.739148	9.44523	-4.65052	5.89e-05	0.000436799	0.932039
Irak4	-1.31397	1.79181	-4.6501	5.9e-05	0.000437093	1.55321
Sez6l	1.01809	8.10681	4.64912	5.91e-05	0.000438094	0.945432
Phf1	0.788439	3.64376	4.64763	5.94e-05	0.000439719	1.33076
Apobec3	-1.42436	2.31961	-4.64632	5.96e-05	0.000441138	1.50754
Dbp	-1.16928	4.8818	-4.64475	5.99e-05	0.000442878	1.1923
Foxf2	-1.82199	0.778256	-4.64215	6.03e-05	0.000445944	1.56916
Homer3	-0.917212	4.35586	-4.64179	6.04e-05	0.000446164	1.22122
Kbtbd3	0.806824	3.77956	4.63897	6.09e-05	0.000449526	1.2779
Lims2	1.00701	4.00448	4.63813	6.1e-05	0.000450372	1.20495
Prkrip1	0.799792	5.07364	4.63679	6.13e-05	0.000451853	1.05258
Bcorl1	0.668819	5.64139	4.63516	6.15e-05	0.000453722	1.00652
Trim14	-1.43589	-0.0699499	-4.63356	6.18e-05	0.000455434	1.58638
Pcyox1l	0.792433	5.39734	4.63348	6.18e-05	0.000455434	1.02323
Tmem132c	-1.03909	4.22683	-4.63299	6.19e-05	0.000455833	1.19049
Cfap126	-1.41772	0.953445	-4.6292	6.26e-05	0.000460534	1.50853
Cyp2j6	1.00693	4.04073	4.62863	6.27e-05	0.000461044	1.16605
Nap1l2	0.890301	6.05075	4.62617	6.31e-05	0.000463886	0.955514
Cfap221	-1.42851	0.615489	-4.62611	6.31e-05	0.000463886	1.52683
Slc39a9	-0.548448	6.21593	-4.62527	6.33e-05	0.000464556	0.945646
Mbnl2	-0.787547	5.36481	-4.62524	6.33e-05	0.000464556	0.991241
Gpc3	-0.689353	4.56684	-4.62479	6.34e-05	0.000464827	1.09164
Peg13	0.622193	7.80857	4.62468	6.34e-05	0.000464827	0.882412
Ing3	-0.622073	5.53608	-4.62296	6.37e-05	0.000466865	0.967731
Rps6ka1	-0.792171	4.37939	-4.62232	6.38e-05	0.000467475	1.1276
Ube2l6	-0.93888	3.85827	-4.62145	6.4e-05	0.00046839	1.15709
Chrna4	0.870852	5.69332	4.62005	6.42e-05	0.000470023	0.938766
Ilvbl	-0.828506	4.39195	-4.61728	6.48e-05	0.000473493	1.1515
Zak	-1.28949	5.06515	-4.61595	6.5e-05	0.000475055	1.07083
Tecta	-1.46366	0.423278	-4.61542	6.51e-05	0.00047543	1.52816
Foxn4	-1.67625	0.00839744	-4.61531	6.51e-05	0.00047543	1.53423
Hist2h4	0.92536	7.41052	4.61416	6.53e-05	0.000476714	0.862321
Phyhipl	0.795988	8.07676	4.614	6.54e-05	0.000476714	0.846448
Syt7	0.93811	7.01349	4.61254	6.56e-05	0.000478452	0.871746
Fas	-2.02646	1.88052	-4.61229	6.57e-05	0.000478551	1.45107
Slc4a2	-0.969826	5.27117	-4.61054	6.6e-05	0.000480696	1.02094
Mfap4	-1.58953	1.37622	-4.60736	6.66e-05	0.000484821	1.47279
Pcdh19	0.846422	6.30791	4.60686	6.67e-05	0.000485261	0.871282
Pcsk5	1.37621	3.85218	4.60604	6.69e-05	0.000486147	1.1587
Abcc4	-1.15977	4.31598	-4.60507	6.7e-05	0.000487246	1.1334
Cfap77	-1.21086	2.15739	-4.60468	6.71e-05	0.000487531	1.32865
Zfp7	0.917283	3.79804	4.60411	6.72e-05	0.000488075	1.14089
Pik3r5	-1.27541	1.13165	-4.60221	6.76e-05	0.00049047	1.39994
Avpi1	0.94035	3.7152	4.60058	6.79e-05	0.000492494	1.13773
Rilpl2	-0.864763	4.62349	-4.60036	6.79e-05	0.000492558	1.03459
Fam81a	1.25331	6.71326	4.59799	6.84e-05	0.00049563	0.832817
Tns3	-0.852958	7.48425	-4.59776	6.84e-05	0.000495706	0.823735
Gli3	-1.19806	5.066	-4.5959	6.88e-05	0.000498091	0.968161
Zcrb1	0.720116	6.24611	4.59526	6.89e-05	0.000498742	0.844205
Ranbp1	0.80907	8.28928	4.59413	6.92e-05	0.000500097	0.790936
Mark4	0.93776	7.31424	4.59257	6.95e-05	0.000501852	0.80509
Hdlbp	-0.679026	7.9336	-4.59254	6.95e-05	0.000501852	0.792688
Vwa5b2	0.933016	3.31591	4.59166	6.96e-05	0.000502834	1.19438
Tmem63c	1.10479	4.69136	4.5915	6.97e-05	0.000502834	0.939013
Gm30340	1.36226	0.479913	4.59046	6.99e-05	0.000504064	1.43417
Gopc	0.774922	6.25253	4.58884	7.02e-05	0.000506139	0.818628
Flnc	-1.86758	3.01509	-4.58837	7.03e-05	0.000506561	1.27498
Hcrtr2	1.56189	1.71827	4.58604	7.08e-05	0.000509423	1.34545
Akr1b10	-0.987207	3.49414	-4.58588	7.08e-05	0.000509423	1.15701
Cnnm4	0.880096	3.32959	4.58585	7.08e-05	0.000509423	1.13082
Nlrp3	-1.62252	-0.221295	-4.58486	7.1e-05	0.000510607	1.45361
Gm29907	1.37729	2.10976	4.58366	7.12e-05	0.000512088	1.2727
[truncated: 12,364 more rows]

## Sheet: SLCS_Starved (3)
List of SLCs change in KO PCCs after amino acid starvation for 2 hrs
Gene	logFC	AveExpr	t	P.Value	adj.P.Val	B
Slc38a10	-6.2049	4.36971	-14.8194	1.42e-15	3.39e-12	25.4041
Slc15a3	-3.70405	1.59373	-8.68632	8.61e-10	4.35e-08	12.4349
Slc11a1	-3.622	1.8775	-8.55049	1.22e-09	5.74e-08	12.0926
Slc40a1	-3.02263	1.71782	-9.22941	2.2e-10	1.55e-08	13.7709
Slco1a5	-2.98918	0.944202	-7.52712	1.81e-08	5.19e-07	9.4727
Slc24a4	-2.8639	3.2445	-6.11909	8.92e-07	1.35e-05	5.55086
Slco2b1	-2.7632	0.9918	-7.61942	1.41e-08	4.23e-07	9.71615
Slc16a4	-2.66239	1.92084	-7.41014	2.48e-08	6.83e-07	9.14138
Slc39a4	-2.59948	0.862905	-7.50394	1.92e-08	5.5e-07	9.41538
Slco1a4	-2.58952	0.37105	-7.11227	5.58e-08	1.33e-06	8.38151
Slc37a2	-2.5106	1.27614	-7.33753	3.02e-08	8.03e-07	8.96192
Slc24a5	-2.33938	0.0733547	-8.04433	4.55e-09	1.63e-07	10.817
Slc43a3	-2.29311	1.71895	-5.62891	3.6e-06	4.29e-05	4.2786
Slc2a2	-1.93935	-0.176146	-7.08964	5.94e-08	1.4e-06	8.32486
Slc12a7	-1.9092	4.39973	-7.62977	1.37e-08	4.14e-07	9.56814
Slc39a12	-1.85217	5.54837	-8.51291	1.34e-09	6.09e-08	11.763
Slc2a4	-1.80109	2.79874	-7.22791	4.07e-08	1.01e-06	8.6228
Slc25a45	-1.73581	1.28446	-5.21481	1.18e-05	0.000114688	3.15782
Slc16a10	-1.69579	0.974139	-4.54757	7.89e-05	0.000554852	1.27547
Slc2a9	-1.6709	0.910895	-5.23567	1.11e-05	0.000108856	3.1975
Slc6a13	-1.66398	1.48383	-4.69222	5.23e-05	0.000397145	1.69206
Slc7a7	-1.64272	1.56845	-5.0217	2.04e-05	0.000181249	2.57552
Slc25a21	-1.52906	0.343656	-4.16633	0.000231263	0.00133393	0.321487
Slc14a1	-1.45435	1.88699	-4.22075	0.000198556	0.00118621	0.353406
Slc6a19	-1.43191	0.122916	-3.99449	0.000373325	0.00197703	-0.132962
Slc35a4	-1.42232	1.95297	-4.29472	0.000161292	0.000997366	0.546528
Slc7a11	-1.38103	5.06006	-4.91147	2.8e-05	0.00023496	1.85059
Slc8b1	-1.36819	2.99779	-4.48943	9.31e-05	0.000631711	0.994125
Slc22a8	-1.34538	0.472706	-3.83309	0.000582943	0.00282941	-0.571024
Slc38a11	-1.22073	0.124771	-4.07045	0.000302264	0.00166384	0.0664869
Slc4a11	-1.17377	1.04122	-3.51521	0.00138184	0.00576741	-1.42329
Slc38a2	-1.1466	7.66598	-9.77984	5.72e-11	5.27e-09	14.8437
Slc25a18	-1.1465	6.01305	-6.57458	2.48e-07	4.61e-06	6.4788
Slc16a1	-1.12245	6.57706	-6.08972	9.69e-07	1.45e-05	5.07776
Slc2a1	-1.08948	6.43599	-5.66478	3.25e-06	3.96e-05	3.86984
Slc14a2	-1.06703	1.6835	-3.77529	0.000683053	0.00322062	-0.78447
Slc13a4	-1.04221	-0.0970013	-3.36163	0.00207952	0.0080632	-1.74364
Slc7a2	-1.03593	3.60068	-3.31807	0.00233252	0.00885767	-2.24724
Slc15a1	-1.01207	0.383783	-3.09472	0.00416625	0.014304	-2.42559
Slc25a13	-0.996139	1.80848	-2.96823	0.00574648	0.0183934	-2.8409
Slc2a10	-0.980062	1.52242	-3.16823	0.00344784	0.0122236	-2.33693
Slc16a12	-0.97096	1.09826	-3.04249	0.00476091	0.0158535	-2.58906
Slc4a2	-0.969826	5.27117	-4.61054	6.6e-05	0.000480696	1.02094
Slc41a1	-0.969153	7.20717	-5.90061	1.66e-06	2.27e-05	4.53683
Slc4a4	-0.933301	7.50225	-3.37678	0.0019979	0.00781422	-2.46908
Slc25a24	-0.929522	1.3204	-2.60426	0.0140351	0.0378894	-3.60727
Slc38a3	-0.828983	7.07893	-4.93294	2.63e-05	0.000222902	1.77425
Slc16a9	-0.820913	3.01871	-2.74669	0.00995645	0.0287138	-3.45316
Slc44a5	-0.814188	4.25494	-4.80296	3.82e-05	0.000305135	1.6539
Slc45a3	-0.812861	0.0372002	-2.71849	0.0106637	0.0304175	-3.28655
Slc35b2	-0.788346	5.34646	-4.32404	0.000148511	0.000928973	0.184208
Slc39a8	-0.756319	0.435844	-2.2888	0.0290984	0.0680527	-4.2064
[truncated: 214 more rows]

## Sheet: Refeed+aa
Gene expression of KO PCCs against WT at Refed Condition
[truncated: 14,363 more rows]

[truncated: 2 more sheets: SLCs _Refeed, DISEASE AND FUNCTION]
