# Supplementary material for: SLC38A10 Regulate Glutamate Homeostasis and Modulate the AKT/TSC2/mTOR Pathway in Mouse Primary Cortex Cells
Source: Front Cell Dev Biol. 2022 Apr 5;10:854397. doi: 10.3389/fcell.2022.854397 (PMC9017388; doi:10.3389/fcell.2022.854397)
Supplement: Supplementary file 4 [file Table3.XLSX]

## Sheet: SLC38A10KO AND WT
Antibody Array Assay Results
Phospho Explorer Array WT VS KO
Median Signal	497.165	680
Protein Name	Average Signal of Replicate Spots			CV of Replicates Spots			Data Normalised to Median Value			Fold Changes		%CV of Replicates Spots
	Untreated WT 40	Treated KO 41		Untreated	Treated		Untreated (U)	Treated (T)		Treated v Control		Untreated	Treated
GSK3 beta (Phospho-Ser9)	521.17	580.83		0.05	0.09		1.04828	0.854162		0.814819		5	9
PDK1 (Phospho-Ser241)	746.17	1020.17		0.1	0.22		1.50085	1.50025		0.9996		10	22
GSK3 alpha (Phospho-Ser21)	565	639.17		0.07	0.13		1.13644	0.939956		0.827103		7	13
PTEN (Phospho-Ser380)	569.17	587.17		0.1	0.1		1.14483	0.863485		0.754247		10	10
AKT (Phospho-Ser473)	558.83	630.33		0.08	0.07		1.12403	0.926956		0.824669		8	7
AKT (Phospho-Thr308)	467.17	504.33		0.09	0.07		0.939668	0.741662		0.789281		9	7
PTEN (Phospho-Ser380/Thr382/Thr383)	654.83	728.17		0.03	0.03		1.31713	1.07084		0.81301		3	3
PTEN (Phospho-Ser370)	503.33	536.83		0.07	0.06		1.0124	0.789456		0.779786		7	6
BAD (Phospho-Ser112)	602.17	747.67		0.02	0.05		1.21121	1.09951		0.907784		2	5
BAD (Phospho-Ser136)	630.17	670.33		0.04	0.06		1.26753	0.985779		0.777719		4	6
BAD (Phospho-Ser155)	590.83	701.67		0.01	0.03		1.1884	1.03187		0.868284		1	3
AKT2 (Phospho-Ser474)	583.17	683.17		0.08	0.08		1.17299	1.00466		0.856496		8	8
AMPK1/AMPK2 (Phospho-Ser485/491)	528.17	711		0.02	0.08		1.06236	1.04559		0.984209		2	8
mTOR (Phospho-Ser2448)	529.83	643.83		0.04	0.08		1.0657	0.946809		0.888436		4	8
4E-BP1 (Phospho-Thr36)	469.17	586		0.03	0.08		0.943691	0.861765		0.913186		3	8
4E-BP1 (Phospho-Thr45)	483.17	703		0.04	0.08		0.97185	1.03382		1.06377		4	8
eIF4E (Phospho-Ser209)	504.33	752.17		0.05	0.1		1.01441	1.10613		1.09042		5	10
ERK1-p44/42 MAP Kinase (Phospho-Thr202)	529.67	708.67		0.03	0.04		1.06538	1.04216		0.978206		3	4
ERK1-p44/42 MAP Kinase (Phospho-Tyr204)	513.33	731.5		0.01	0.05		1.03251	1.07574		1.04186		1	5
P70S6K (Phospho-Ser411)	495.83	845.33		0.02	0.04		0.997315	1.24313		1.24648		2	4
eIF2 alpha (Phospho-Ser51)	473.17	672.83		0.05	0.04		0.951736	0.989456		1.03963		5	4
P70S6K (Phospho-Ser424)	490.17	852.33		0.05	0.05		0.98593	1.25343		1.27131		5	5
AMPK1 (Phospho-Thr174)	490	882		0.03	0.04		0.985588	1.29706		1.31603		3	4
GSK3 beta (Ab-9)	441.33	603		0.04	0.02		0.887693	0.886765		0.998954		4	2
PDK1 (Ab-241)	2219.83	2233		0.26	0.07		4.46498	3.28382		0.735463		26	7
GSK3 alpha (Ab-21)	443.17	672.17		0.04	0.09		0.891394	0.988485		1.10892		4	9
PTEN (Ab-380)	586.17	779.83		0.1	0.07		1.17903	1.14681		0.972676		10	7
AKT (Ab-473)	415	465.17		0.18	0.05		0.834733	0.684074		0.819512		18	5
AKT (Ab-308)	524.33	683.33		0.08	0.06		1.05464	1.0049		0.952834		8	6
PTEN (Ab-380/382/383)	480.5	559.17		0.08	0.06		0.96648	0.822309		0.850829		8	6
PTEN (Ab-370)	611.83	767.67		0.11	0.09		1.23064	1.12893		0.917351		11	9
BAD (Ab-112)	478.17	542.33		0.07	0.03		0.961793	0.797544		0.829226		7	3
BAD (Ab-136)	436.67	467.33		0.11	0.05		0.87832	0.68725		0.78246		11	5
BAD (Ab-155)	412.83	477.67		0.11	0.07		0.830368	0.702456		0.845957		11	7
AKT2 (Ab-474)	446.83	517.33		0.06	0.03		0.898756	0.760779		0.846481		6	3
mTOR (Ab-2448)	443	490.83		0.05	0.06		0.891052	0.721809		0.810063		5	6
4E-BP1 (Ab-36)	455	571		0.03	0.04		0.915189	0.839706		0.917522		3	4
4E-BP1 (Ab-45)	498.5	626.33		0.04	0.07		1.00269	0.921074		0.918607		4	7
eIF4E (Ab-209)	397.67	568.67		0.06	0.04		0.799875	0.836279		1.04551		6	4
ERK1-p44/42 MAP Kinase (Ab-202)	461.83	636		0.03	0.07		0.928927	0.935294		1.00685		3	7
ERK1-p44/42 MAP Kinase (Ab-204)	417.67	600		0.09	0.1		0.840103	0.882353		1.05029		9	10
P70S6K (Ab-411)	439	567.17		0.05	0.04		0.883007	0.834074		0.944584		5	4
eIF2 alpha (Ab-51)	666.5	840		0.04	0.01		1.3406	1.23529		0.921448		4	1
P70S6K (Ab-424)	390.33	601.33		0.07	0.06		0.785112	0.884309		1.12635		7	6
AMPK1 (Ab-174)	475.17	663.83		0.04	0.09		0.955759	0.976221		1.02141		4	9
GSK3a-b (Phospho-Tyr216/279)	483.17	679		0.08	0.12		0.97185	0.998529		1.02745		8	12
P70S6K (Phospho-Thr421)	452.5	675.33		0.05	0.07		0.910161	0.993132		1.09116		5	7
4E-BP1 (Phospho-Ser65)	540.5	965		0.05	0.05		1.08716	1.41912		1.30534		5	5
4E-BP1 (Phospho-Thr70)	471.5	899.5		0.05	0.07		0.948377	1.32279		1.3948		5	7
AKT1 (Phospho-Thr450)	456	770.5		0.06	0.07		0.917201	1.13309		1.23538		6	7
AKT1 (Phospho-Ser124)	451.5	859.17		0.02	0.08		0.908149	1.26349		1.39128		2	8
AMPKbeta1 (Phospho-Ser182)	484.67	931.17		0.08	0.08		0.974867	1.36937		1.40467		8	8
AKT1S1 (Phospho-Thr246)	443.5	799.83		0.05	0.09		0.892058	1.17622		1.31855		5	9
P70S6K (Phospho-Thr229)	411.5	684.33		0.04	0.09		0.827693	1.00637		1.21587		4	9
P70S6K (Phospho-Ser371)	464.83	819.5		0.05	0.13		0.934961	1.20515		1.28898		5	13
P70S6K (Phospho-Thr389)	398	721.5		0.04	0.04		0.800539	1.06103		1.32539		4	4
P70S6K (Phospho-Ser418)	430.83	742.83		0.05	0.05		0.866573	1.0924		1.26059		5	5
P90RSK (Phospho-Thr359/Ser363)	611.5	828.83		0.05	0.27		1.22997	1.21887		0.99097		5	27
P90RSK (Phospho-Ser380)	468.67	546.83		0.06	0.06		0.942685	0.804162		0.853055		6	6
P90RSK (Phospho-Thr573)	613.67	674.5		0.04	0.06		1.23434	0.991912		0.803598		4	6
PP2A-a (Phospho-Tyr307)	565.17	633.17		0.05	0.05		1.13679	0.931132		0.819092		5	5
Tuberin/TSC2 (Phospho-Ser939)	452	534.17		0.09	0.07		0.909155	0.785544		0.864038		9	7
Tuberin/TSC2 (Phospho-Thr1462)	421	526		0.04	0.03		0.846801	0.773529		0.913472		4	3
AKT1 (Phospho-Tyr474)	536.5	580.17		0.03	0.05		1.07912	0.853191		0.790637		3	5
AKT1 (Phospho-Ser246)	599.33	655.83		0.06	0.1		1.2055	0.964456		0.80005		6	10
AKT1 (Phospho-Thr72)	440.5	538.67		0.05	0.11		0.886024	0.792162		0.894064		5	11
eIF4B (Phospho-Ser422)	569	642		0.09	0.12		1.14449	0.944118		0.824925		9	12
eIF4G (Phospho-Ser1108)	611.17	655.33		0.04	0.03		1.22931	0.963721		0.783952		4	3
mTOR (Phospho-Ser2481)	554.17	622.5		0.03	0.06		1.11466	0.915441		0.821274		3	6
PKC alpha/beta II (Phospho-Thr638)	647.33	656		0.05	0.03		1.30204	0.964706		0.740917		5	3
6-phosphofructo-2-kinase/fructose-2,6-biphosphatase 2 (PFKFB2) (Phospho-Ser483)	437.33	476.33		0.04	0.04		0.879648	0.700485		0.796325		4	4
PKC alpha (Phospho-Tyr657)	678.33	778.67		0.05	0.16		1.3644	1.1451		0.839275		5	16
AKT (Phospho-Tyr326)	604.67	747		0.06	0.06		1.21624	1.09853		0.903221		6	6
BAD (Phospho-Ser91/128)	587.17	759.33		0.12	0.09		1.18104	1.11666		0.945493		12	9
BAD (Phospho-Ser134)	433.83	620.17		0.02	0.04		0.872608	0.912015		1.04516		2	4
ERK3 (Phospho-Ser189)	571.17	845.83		0.05	0.09		1.14885	1.24387		1.0827		5	9
ERK8 (Phospho-Thr175/Tyr177)	548.33	840		0.07	0.08		1.10291	1.23529		1.12003		7	8
mTOR (Phospho-Thr2446)	545.83	796.33		0.04	0.11		1.09789	1.17107		1.06666		4	11
PI3-kinase p85-subunit alpha/gamma (Phospho-Tyr467/Tyr199)	514.67	701.5		0.05	0.09		1.03521	1.03162		0.99653		5	9
PI3-kinase p85-alpha (Phospho-Tyr607)	462	661		0.08	0.08		0.929269	0.972059		1.04605		8	8
Rho/Rac guanine nucleotide exchange factor 2 (Phospho-Ser885)	477	670.67		0.05	0.06		0.95944	0.986279		1.02797		5	6
P70S6k-beta (Phospho-Ser423)	530.17	738.5		0.04	0.1		1.06639	1.08603		1.01842		4	10
RSK1/2/3/4 (Phospho-Ser221/227/218/232)	461	644.83		0.04	0.13		0.927258	0.948279		1.02267		4	13
PPAR-b (Phospho-Thr1457)	484.5	679.5		0.06	0.08		0.974526	0.999265		1.02539		6	8
PPAR-r (Phospho-Ser112)	443.33	680.5		0.05	0.06		0.891716	1.00074		1.12226		5	6
PIP5K (Phospho-Ser307)	420	581		0.08	0.11		0.84479	0.854412		1.01139		8	11
Mnk1 (Phospho-Thr385)	612.17	736.17		0.11	0.06		1.23132	1.0826		0.87922		11	6
IR (Phospho-Tyr1355)	448.33	519.83		0.02	0.09		0.901773	0.764456		0.847725		2	9
IR (Phospho-Tyr1361)	808.17	759.5		0.09	0.08		1.62556	1.11691		0.687095		9	8
AMPK1/AMPK2 (Ab-485/491)	473	568.67		0.03	0.06		0.951394	0.836279		0.879004		3	6
P70S6K (Ab-421)	442.33	545.5		0.03	0.04		0.889705	0.802206		0.901654		3	4
GSK3a-b (Ab-216/279)	437.17	513.33		0.06	0.02		0.879326	0.754897		0.858495		6	2
4E-BP1 (Ab-65)	4134.17	3568.67		0.46	0.33		8.31549	5.24804		0.631117		46	33
4E-BP1 (Ab-70)	582	656.5		0.09	0.06		1.17064	0.965441		0.824714		9	6
AKT1 (Ab-450)	592.67	704.17		0.03	0.07		1.1921	1.03554		0.868673		3	7
AKT1 (Ab-124)	700.67	732.83		0.04	0.04		1.40933	1.07769		0.764683		4	4
AMPKbeta1 (Ab-182)	761	811.33		0.03	0.05		1.53068	1.19313		0.779479		3	5
AKT1S1 (Ab-246)	2281.33	1883		0.02	0.04		4.58868	2.76912		0.603467		2	4
P70S6K (Ab-229)	654.67	735.67		0.06	0.03		1.31681	1.08187		0.821585		6	3
P70S6K (Ab-371)	589.67	670.17		0.09	0.09		1.18606	0.985544		0.830936		9	9
P70S6K (Ab-418)	508.5	556.17		0.02	0.06		1.0228	0.817897		0.799665		2	6
P90RSK (Ab-359/363)	5287.17	3373.83		0.1	0.08		10.6346	4.96151		0.466543		10	8
P90RSK (Ab-380)	628.5	718.33		0.07	0.13		1.26417	1.05637		0.835623		7	13
P90RSK (Ab-573)	1203.5	1244.33		0.05	0.14		2.42073	1.8299		0.755929		5	14
PP2A-a (Ab-307)	2651	2356.67		0.12	0.11		5.33223	3.46569		0.649951		12	11
RhoA (Ab-188)	1053.67	1272		0.06	0.2		2.11936	1.87059		0.882621		6	20
Tuberin/TSC2 (Ab-939)	1044.17	1547		0.03	0.18		2.10025	2.275		1.08321		3	18
Tuberin/TSC2 (Ab-1462)	430.33	697		0.04	0.14		0.865568	1.025		1.18419		4	14
AKT1 (Ab-474)	594.17	1063.5		0.03	0.11		1.19512	1.56397		1.30863		3	11
AKT1 (Ab-246)	425.33	667.17		0.05	0.11		0.855511	0.981132		1.14684		5	11
AKT1 (Ab-72)	444.83	681.5		0.02	0.06		0.894733	1.00221		1.12012		2	6
eIF4G (Ab-1108)	797.83	1049.5		0.06	0.11		1.60476	1.54338		0.961753		6	11
mTOR (Ab-2481)	495.33	772		0.02	0.15		0.996309	1.13529		1.1395		2	15
PKC alpha/beta II (Ab-638)	461	667.5		0.05	0.08		0.927258	0.981618		1.05862		5	8
6-phosphofructo-2-kinase/fructose-2,6-biphosphatase 2 (PFKFB2) (Ab-483)	420.83	611.67		0.05	0.08		0.846459	0.899515		1.06268		5	8
PKC alpha (Ab-657)	414.83	596.67		0.04	0.07		0.834391	0.877456		1.05161		4	7
AKT (Ab-326)	480	657		0.04	0.05		0.965474	0.966176		1.00073		4	5
BAD (Ab-91/128)	675.67	590.5		0.06	0.12		1.35905	0.868382		0.638965		6	12
BAD (Ab-134)	539.67	627.33		0.1	0.12		1.08549	0.922544		0.849884		10	12
ERK3 (Ab-189)	437.17	625.67		0.04	0.13		0.879326	0.920103		1.04637		4	13
mTOR (Ab-2446)	346.5	555.5		0.18	0.13		0.696952	0.816912		1.17212		18	13
PI3-kinase p85-subunit alpha/gamma (Ab-467/199)	492.67	668.17		0.08	0.09		0.990959	0.982603		0.991568		8	9
Rho/Rac guanine nucleotide exchange factor 2 (Ab-885)	388	612.5		0.16	0.08		0.780425	0.900735		1.15416		16	8
P70S6K (Ab-427)	380.17	622.67		0.14	0.07		0.764676	0.915691		1.19749		14	7
P70S6k-beta (Ab-423)	501	740.83		0.16	0.07		1.00771	1.08946		1.08112		16	7
RSK1/2/3/4 (Ab-221/227/218/232)	506.17	738.83		0.19	0.07		1.01811	1.08651		1.06719		19	7
Tuberin (Ab-981)	467	784.67		0.19	0.08		0.939326	1.15393		1.22846		19	8
PLK1 (Ab-210)	602.67	1024.83		0.2	0.06		1.21221	1.5071		1.24327		20	6
PPAR-b (Ab-1457)	469.17	797.33		0.17	0.08		0.943691	1.17254		1.24251		17	8
PPAR-r (Ab-112)	2650.5	3631.67		0.26	0.15		5.33123	5.34069		1.00178		26	15
Mnk1 (Ab-385)	576.33	842.83		0.17	0.1		1.15923	1.23946		1.0692		17	10
ERK1/2 (N-term)	492.33	775.17		0.12	0.17		0.990275	1.13996		1.15115		12	17
6-Phosphofructo-2-Kinase (PFKFB2) (inter)	678.5	883		0.12	0.22		1.36474	1.29853		0.951486		12	22
CBPN (inter)	549.5	827.5		0.08	0.17		1.10527	1.21691		1.10101		8	17
CBP (inter)	422	627.67		0.09	0.13		0.848813	0.923044		1.08745		9	13
PIP5K (inter)	435	689.5		0.05	0.05		0.874961	1.01397		1.15888		5	5
LRP11 (inter)	413.83	661.5		0.05	0.1		0.83238	0.972794		1.16869		5	10
LRP3 (inter)	501.67	691.5		0.03	0.1		1.00906	1.01691		1.00778		3	10
Beta actin	5268.33	4327.83		0.07	0.14		10.5967	6.36446		0.600605		7	14
GAPDH	368.33	636.33		0.04	0.12		0.740861	0.935779		0		4	12
												0	0
Average of Empty Spots on the Array	389.54	818		0.112478	0.0251624				Min	0		11.2478	2.51624
Average of Negative Controls on the Array	119.375	556.918		0.172419	0.497785				Max	1.40467		17.2419	49.7785
Average of Positive Marker Spots on the Array	10018.3	11826.8		0.128757	0.183193				Mean	0.968209		12.8757	18.3193

## Sheet: Starved SLC38A10KO AND  WT 
Antibody Array Assay Results
Phospho Explorer Array WT VS SLC38A10 KO
KO S 2HR VS WT S 2HR
Median Signal	451.75	973.75
Protein Name	Average Signal of Replicate Spots			CV of Replicates Spots			Data Normalised to Median Value			Fold Changes		%CV of Replicates Spots
	Untreated WT S2HR20	Treated KO S2HR26		Untreated	Treated		Untreated (U)	Treated (T)		Treated v Control		Untreated	Treated
GSK3 beta (Phospho-Ser9)	362.83	638.17		0.19	0.15		0.803165	0.655374		0.815988		19	15
PDK1 (Phospho-Ser241)	952.5	838.83		0.48	0.07		2.10847	0.861443		0.408564		48	7
GSK3 alpha (Phospho-Ser21)	628.17	726.17		0.26	0.14		1.39053	0.745746		0.536305		26	14
PTEN (Phospho-Ser380)	342	525.33		0.3	0.09		0.757056	0.539492		0.712618		30	9
AKT (Phospho-Ser473)	318.83	576		0.28	0.23		0.705766	0.591528		0.838135		28	23
AKT (Phospho-Thr308)	237.83	518.67		0.13	0.08		0.526464	0.532652		1.01175		13	8
PTEN (Phospho-Ser380/Thr382/Thr383)	311.5	772.17		0.22	0.11		0.689541	0.792986		1.15002		22	11
PTEN (Phospho-Ser370)	328.5	618		0.12	0.07		0.727172	0.63466		0.872778		12	7
BAD (Phospho-Ser112)	334.67	942.5		0.14	0.07		0.74083	0.967908		1.30652		14	7
BAD (Phospho-Ser136)	301.67	743		0.12	0.17		0.667781	0.76303		1.14263		12	17
BAD (Phospho-Ser155)	269.83	656.67		0.25	0.09		0.597299	0.674372		1.12904		25	9
AKT2 (Phospho-Ser474)	410.5	1004.83		0.12	0.15		0.908688	1.03192		1.13561		12	15
AMPK1/AMPK2 (Phospho-Ser485/491)	289.67	764.83		0.04	0.06		0.641217	0.785448		1.22493		4	6
mTOR (Phospho-Ser2448)	353.67	748		0.11	0.07		0.782889	0.768164		0.981192		11	7
4E-BP1 (Phospho-Thr36)	333.17	721.83		0.47	0.06		0.73751	0.741289		1.00512		47	6
4E-BP1 (Phospho-Thr45)	380.67	783.33		0.73	0.08		0.842656	0.804447		0.954656		73	8
eIF4E (Phospho-Ser209)	311.5	887.33		0.16	0.06		0.689541	0.91125		1.32153		16	6
ERK1-p44/42 MAP Kinase (Phospho-Thr202)	389.33	1070.83		0.17	0.08		0.861826	1.0997		1.27601		17	8
ERK1-p44/42 MAP Kinase (Phospho-Tyr204)	370.5	1139.17		0.12	0.1		0.820144	1.16988		1.42643		12	10
P70S6K (Phospho-Ser411)	415.33	1560		0.15	0.04		0.91938	1.60205		1.74254		15	4
eIF2 alpha (Phospho-Ser51)	704	1231.5		0.34	0.1		1.55838	1.2647		0.811545		34	10
P70S6K (Phospho-Ser424)	712	1176		0.12	0.16		1.57609	1.2077		0.766263		12	16
AMPK1 (Phospho-Thr174)	559.5	1074.33		0.41	0.09		1.23852	1.10329		0.890817		41	9
GSK3 beta (Ab-9)	278	818.5		0.36	0.15		0.615385	0.840565		1.36592		36	15
PDK1 (Ab-241)	2466.5	5384.17		0.2	0.2		5.45988	5.52931		1.01272		20	20
GSK3 alpha (Ab-21)	297.5	908.33		0.04	0.09		0.65855	0.932816		1.41647		4	9
PTEN (Ab-380)	526.33	990.17		0.06	0.07		1.16509	1.01686		0.872775		6	7
AKT (Ab-473)	180.5	484		0.06	0.14		0.399557	0.497047		1.244		6	14
AKT (Ab-308)	180.83	666		0.02	0.09		0.400288	0.683954		1.70866		2	9
PTEN (Ab-380/382/383)	168.83	517.5		0.06	0.09		0.373724	0.531451		1.42204		6	9
PTEN (Ab-370)	191.67	780.33		0.06	0.15		0.424283	0.801366		1.88875		6	15
BAD (Ab-112)	263	473.67		0.24	0.05		0.58218	0.486439		0.835547		24	5
BAD (Ab-136)	315.83	455		0.31	0.11		0.699126	0.467266		0.668357		31	11
BAD (Ab-155)	203.83	465		0.06	0.04		0.451201	0.477535		1.05837		6	4
AKT2 (Ab-474)	196.33	533.83		0.06	0.03		0.434599	0.548221		1.26144		6	3
mTOR (Ab-2448)	205.83	643.33		0.04	0.03		0.455628	0.660673		1.45003		4	3
4E-BP1 (Ab-36)	210.33	653		0.03	0.05		0.465589	0.670603		1.44033		3	5
4E-BP1 (Ab-45)	229.67	819.17		0.04	0.02		0.508401	0.841253		1.6547		4	2
eIF4E (Ab-209)	220.17	696.17		0.02	0.07		0.487371	0.714937		1.46692		2	7
ERK1-p44/42 MAP Kinase (Ab-202)	256	784.67		0.06	0.11		0.566685	0.805823		1.42199		6	11
ERK1-p44/42 MAP Kinase (Ab-204)	262	747.83		0.21	0.09		0.579967	0.76799		1.3242		21	9
P70S6K (Ab-411)	293.17	783.33		0.32	0.03		0.648965	0.804447		1.23958		32	3
eIF2 alpha (Ab-51)	265.67	1171.67		0.14	0.07		0.588091	1.20326		2.04604		14	7
P70S6K (Ab-424)	250.17	853.5		0.18	0.07		0.55378	0.876508		1.58277		18	7
AMPK1 (Ab-174)	271	854.17		0.28	0.06		0.599889	0.877196		1.46226		28	6
GSK3a-b (Phospho-Tyr216/279)	218.33	902		0.04	0.05		0.483298	0.926316		1.91665		4	5
P70S6K (Phospho-Thr421)	298.67	1072.17		0.55	0.08		0.66114	1.10107		1.66542		55	8
4E-BP1 (Phospho-Ser65)	289.83	2448.5		0.32	0.12		0.641572	2.51451		3.91929		32	12
4E-BP1 (Phospho-Thr70)	418	1801.33		0.16	0.09		0.925291	1.84989		1.99925		16	9
AKT1 (Phospho-Thr450)	639	1596.67		0.11	0.12		1.4145	1.63971		1.15922		11	12
AKT1 (Phospho-Ser124)	811.33	1448.5		0.07	0.13		1.79597	1.48755		0.828269		7	13
AMPKbeta1 (Phospho-Ser182)	598.17	1406.83		0.92	0.07		1.32412	1.44475		1.09111		92	7
AKT1S1 (Phospho-Thr246)	253.17	1269.5		0.04	0.03		0.560421	1.30372		2.32633		4	3
P70S6K (Phospho-Thr229)	232.83	1043.83		0.05	0.14		0.515396	1.07197		2.0799		5	14
P70S6K (Phospho-Ser371)	260.33	1099.17		0.08	0.1		0.57627	1.1288		1.95881		8	10
P70S6K (Phospho-Thr389)	220.17	840.17		0.04	0.09		0.487371	0.862819		1.77035		4	9
P70S6K (Phospho-Ser418)	274.83	963.83		0.11	0.06		0.608367	0.989813		1.627		11	6
P90RSK (Phospho-Thr359/Ser363)	234.83	1592.33		0.16	1.02		0.519823	1.63526		3.14579		16	102
P90RSK (Phospho-Ser380)	196.67	567.83		0.05	0.12		0.435351	0.583137		1.33946		5	12
P90RSK (Phospho-Thr573)	212	792		0.09	0.06		0.469286	0.81335		1.73317		9	6
PP2A-a (Phospho-Tyr307)	209.67	738		0.05	0.04		0.464128	0.757895		1.63294		5	4
Tuberin/TSC2 (Phospho-Ser939)	254.17	537.17		0.27	0.07		0.562634	0.551651		0.980479		27	7
Tuberin/TSC2 (Phospho-Thr1462)	252.5	565.5		0.25	0.12		0.558937	0.580745		1.03902		25	12
AKT1 (Phospho-Tyr474)	285.83	651.67		0.27	0.05		0.632717	0.669237		1.05772		27	5
AKT1 (Phospho-Ser246)	287.83	739.33		0.32	0.08		0.637144	0.759261		1.19166		32	8
AKT1 (Phospho-Thr72)	334	630.5		0.49	0.09		0.739347	0.647497		0.875768		49	9
eIF4B (Phospho-Ser422)	383.67	884.67		0.43	0.13		0.849297	0.908519		1.06973		43	13
eIF4G (Phospho-Ser1108)	413.17	998.5		0.39	0.06		0.914599	1.02542		1.12117		39	6
mTOR (Phospho-Ser2481)	501.17	897.33		0.31	0.09		1.1094	0.92152		0.83065		31	9
PKC alpha/beta II (Phospho-Thr638)	512.5	1063.83		0.2	0.08		1.13448	1.09251		0.963006		20	8
6-phosphofructo-2-kinase/fructose-2,6-biphosphatase 2 (PFKFB2) (Phospho-Ser483)	514.17	781.67		0.15	0.09		1.13817	0.802742		0.705289		15	9
PKC alpha (Phospho-Tyr657)	568.67	1283.67		0.27	0.19		1.25882	1.31827		1.04723		27	19
AKT (Phospho-Tyr326)	707.83	1047.83		0.26	0.1		1.56686	1.07608		0.686772		26	10
BAD (Phospho-Ser91/128)	743.67	1173.83		0.41	0.15		1.6462	1.20547		0.732277		41	15
BAD (Phospho-Ser134)	692	1118.33		0.22	0.21		1.53182	1.14848		0.749747		22	21
ERK3 (Phospho-Ser189)	580.5	1616.83		0.42	0.11		1.285	1.66042		1.29215		42	11
ERK8 (Phospho-Thr175/Tyr177)	430.5	1519.83		0.2	0.16		0.952961	1.5608		1.63784		20	16
mTOR (Phospho-Thr2446)	460.5	1569.33		0.36	0.03		1.01937	1.61164		1.58101		36	3
PI3-kinase p85-subunit alpha/gamma (Phospho-Tyr467/Tyr199)	494.5	1616		0.23	0.1		1.09463	1.65956		1.51609		23	10
PI3-kinase p85-alpha (Phospho-Tyr607)	610.83	1607.67		0.06	0.08		1.35214	1.65101		1.22103		6	8
Rho/Rac guanine nucleotide exchange factor 2 (Phospho-Ser885)	759	1392		0.1	0.21		1.68013	1.42953		0.85084		10	21
P70S6k-beta (Phospho-Ser423)	1091.67	1330		0.05	0.08		2.41654	1.36585		0.565211		5	8
RSK1/2/3/4 (Phospho-Ser221/227/218/232)	1098.83	1120.67		0.14	0.09		2.43239	1.15088		0.473149		14	9
PPAR-b (Phospho-Thr1457)	911.17	1287		0.47	0.1		2.01698	1.32169		0.655284		47	10
PPAR-r (Phospho-Ser112)	255.33	1134.17		0.08	0.05		0.565202	1.16474		2.06076		8	5
PIP5K (Phospho-Ser307)	245.67	804.17		0.05	0.06		0.543818	0.825849		1.51861		5	6
Mnk1 (Phospho-Thr385)	386.67	1039.67		0.28	0.12		0.855938	1.0677		1.2474		28	12
IR (Phospho-Tyr1355)	298.83	861.17		0.03	0.12		0.661494	0.884385		1.33695		3	12
IR (Phospho-Tyr1361)	422.33	1176.83		0.3	0.11		0.934875	1.20855		1.29274		30	11
AMPK1/AMPK2 (Ab-485/491)	264.67	601.17		0.1	0.09		0.585877	0.617376		1.05376		10	9
P70S6K (Ab-421)	443	470.83		0.45	0.04		0.980631	0.483522		0.493073		45	4
GSK3a-b (Ab-216/279)	687.33	472		0.45	0.06		1.52148	0.484724		0.318587		45	6
4E-BP1 (Ab-65)	7584.17	7330.33		0.3	0.48		16.7884	7.52794		0.448401		30	48
4E-BP1 (Ab-70)	1341.5	832.33		0.22	0.11		2.96956	0.854768		0.287843		22	11
AKT1 (Ab-450)	1201.83	819		0.23	0.09		2.66039	0.841078		0.316149		23	9
AKT1 (Ab-124)	1294.83	1014.83		0.15	0.02		2.86625	1.04219		0.363606		15	2
AMPKbeta1 (Ab-182)	1270.83	952.67		0.11	0.1		2.81313	0.978352		0.347781		11	10
AKT1S1 (Ab-246)	4933	3626.67		0.26	0.03		10.9198	3.72444		0.341073		26	3
P70S6K (Ab-229)	1275.17	983.67		0.23	0.01		2.82273	1.01019		0.357876		23	1
P70S6K (Ab-371)	1000.5	905.17		0.22	0.08		2.21472	0.929571		0.419724		22	8
P70S6K (Ab-418)	814.17	891.33		0.51	0.07		1.80226	0.915358		0.507895		51	7
P90RSK (Ab-359/363)	6492	9161.5		0.09	0.03		14.3708	9.40847		0.654695		9	3
P90RSK (Ab-380)	682.67	855.67		0.44	0.04		1.51117	0.878737		0.581495		44	4
P90RSK (Ab-573)	1788.17	2752		0.18	0.14		3.95832	2.82619		0.713987		18	14
PP2A-a (Ab-307)	3765.5	5441		0.15	0.12		8.33536	5.58768		0.670358		15	12
RhoA (Ab-188)	1475.67	2952		0.07	0.08		3.26656	3.03158		0.928064		7	8
Tuberin/TSC2 (Ab-939)	1537.5	3360		0.26	0.08		3.40343	3.45058		1.01385		26	8
Tuberin/TSC2 (Ab-1462)	847.5	1167.67		0.21	0.12		1.87604	1.19915		0.639192		21	12
AKT1 (Ab-474)	928.67	2417.33		0.26	0.05		2.05572	2.4825		1.20761		26	5
AKT1 (Ab-246)	806.83	1381.33		0.28	0.05		1.78601	1.41857		0.794266		28	5
AKT1 (Ab-72)	826.17	985.83		0.1	0.05		1.82882	1.01241		0.553584		10	5
eIF4G (Ab-1108)	1419.5	2059.17		0.06	0.06		3.14222	2.11468		0.672988		6	6
mTOR (Ab-2481)	750.83	1657.67		0.65	0.08		1.66205	1.70236		1.02425		65	8
PKC alpha/beta II (Ab-638)	284.33	1313.83		0.12	0.05		0.629397	1.34925		2.14372		12	5
6-phosphofructo-2-kinase/fructose-2,6-biphosphatase 2 (PFKFB2) (Ab-483)	263.83	1559.5		0.05	0.09		0.584018	1.60154		2.74228		5	9
PKC alpha (Ab-657)	222.67	1368.83		0.06	0.09		0.492905	1.40573		2.85193		6	9
AKT (Ab-326)	671.5	1313.17		0.1	0.05		1.48644	1.34857		0.907247		10	5
BAD (Ab-91/128)	354.17	699.33		0.36	0.19		0.783996	0.718182		0.916054		36	19
BAD (Ab-134)	769.83	1058.67		0.4	0.11		1.70411	1.08721		0.637994		40	11
ERK3 (Ab-189)	765.67	829.5		0.2	0.15		1.6949	0.851861		0.502603		20	15
mTOR (Ab-2446)	736.33	562		0.35	0.1		1.62995	0.57715		0.354091		35	10
PI3-kinase p85-subunit alpha/gamma (Ab-467/199)	743.33	675		0.3	0.14		1.64545	0.693196		0.421282		30	14
Rho/Rac guanine nucleotide exchange factor 2 (Ab-885)	573.33	586.33		0.08	0.05		1.26913	0.602136		0.474447		8	5
P70S6K (Ab-427)	531.33	597.83		0.14	0.02		1.17616	0.613946		0.521992		14	2
P70S6k-beta (Ab-423)	988.67	750.17		0.2	0.12		2.18853	0.770393		0.352013		20	12
RSK1/2/3/4 (Ab-221/227/218/232)	1122.5	808.67		0.09	0.08		2.48478	0.83047		0.334222		9	8
Tuberin (Ab-981)	957.5	827		0.21	0.04		2.11954	0.849294		0.400698		21	4
PLK1 (Ab-210)	1482	1011.17		0.26	0.09		3.28058	1.03843		0.316539		26	9
PPAR-b (Ab-1457)	1296.17	712.83		0.13	0.1		2.86922	0.732046		0.255138		13	10
PPAR-r (Ab-112)	5876.17	6913.67		0.18	0.16		13.0076	7.10005		0.54584		18	16
Mnk1 (Ab-385)	1313	1118.83		0.26	0.05		2.90647	1.14899		0.395321		26	5
ERK1/2 (N-term)	997.33	1018.17		0.37	0.04		2.2077	1.04562		0.473622		37	4
6-Phosphofructo-2-Kinase (PFKFB2) (inter)	1432.67	1084.33		0.32	0.03		3.17138	1.11356		0.351128		32	3
CBPN (inter)	1070.67	1255.83		0.47	0.08		2.37005	1.28968		0.544159		47	8
CBP (inter)	776.5	1220		0.23	0.12		1.71887	1.25289		0.728902		23	12
PIP5K (inter)	970	1421		0.27	0.1		2.14721	1.45931		0.679631		27	10
LRP11 (inter)	659	1378		0.48	0.1		1.45877	1.41515		0.970096		48	10
LRP3 (inter)	645.5	1749.33		0.48	0.05		1.42889	1.79649		1.25726		48	5
Beta actin	6396.17	15036.2		0.14	0.11		14.1586	15.4415		1.09061		14	11
GAPDH	751.67	1270.5		0.18	0.05		1.66391	1.30475		0.784148		18	5
												0	0
Average of Empty Spots on the Array	148.25	344.58		0.112478	0.0251624				Min	0.255138		11.2478	2.51624
Average of Negative Controls on the Array	590.168	787.335		0.172419	0.497785				Max	3.91929		17.2419	49.7785
Average of Positive Marker Spots on the Array	12228	12845.7		0.128757	0.183193				Mean	1.07658		12.8757	18.3193

## Sheet: Refeed SLC38A10KO AND  WT
Antibody Array Assay Results
Phospho Explorer Array WT VS SLC38A10 KO
KO 1 HR AA VS WT 1 HR AA	21	27
Median Signal	404.33	736
Protein Name	Average Signal of Replicate Spots			CV of Replicates Spots			Data Normalised to Median Value			Fold Changes		%CV of Replicates Spots
	Untreated WT_1HRAA21	Treated KO _1HRAA27		Untreated	Treated		Untreated (U)	Treated (T)		Treated v Control		Untreated	Treated
GSK3 beta (Phospho-Ser9)	360.5	716.83		0.2	0.1		0.891598	0.973954		1.09237		20	10
PDK1 (Phospho-Ser241)	475	930.83		0.18	0.21		1.17478	1.26471		1.07655		18	21
GSK3 alpha (Phospho-Ser21)	396.5	1240.17		0.12	0.27		0.980635	1.68501		1.71829		12	27
PTEN (Phospho-Ser380)	316	1045.67		0.27	0.29		0.78154	1.42075		1.81788		27	29
AKT (Phospho-Ser473)	387.17	726		0.13	0.19		0.957559	0.986413		1.03013		13	19
AKT (Phospho-Thr308)	329.5	552		0.14	0.11		0.814928	0.75		0.920326		14	11
PTEN (Phospho-Ser380/Thr382/Thr383)	399.83	748.83		0.17	0.16		0.98887	1.01743		1.02888		17	16
PTEN (Phospho-Ser370)	407.83	674.83		0.13	0.16		1.00866	0.916889		0.90902		13	16
BAD (Phospho-Ser112)	450	885.5		0.13	0.23		1.11295	1.20312		1.08102		13	23
BAD (Phospho-Ser136)	474.33	771.33		0.14	0.25		1.17313	1.048		0.893342		14	25
BAD (Phospho-Ser155)	367.33	827.67		0.34	0.38		0.908491	1.12455		1.23782		34	38
AKT2 (Phospho-Ser474)	564.33	987		0.13	0.47		1.39572	1.34103		0.96082		13	47
AMPK1/AMPK2 (Phospho-Ser485/491)	364.33	758.5		0.11	0.2		0.901071	1.03057		1.14372		11	20
mTOR (Phospho-Ser2448)	380.17	768		0.16	0.42		0.940247	1.04348		1.10979		16	42
4E-BP1 (Phospho-Thr36)	318.67	699.17		0.07	0.18		0.788143	0.949959		1.20531		7	18
4E-BP1 (Phospho-Thr45)	311.67	662.5		0.04	0.13		0.770831	0.900136		1.16775		4	13
eIF4E (Phospho-Ser209)	364	795		0.03	0.27		0.900255	1.08016		1.19984		3	27
ERK1-p44/42 MAP Kinase (Phospho-Thr202)	552	812.67		0.03	0.12		1.36522	1.10417		0.808785		3	12
ERK1-p44/42 MAP Kinase (Phospho-Tyr204)	522.17	949		0.07	0.22		1.29145	1.2894		0.998418		7	22
P70S6K (Phospho-Ser411)	358.5	890.17		0.17	0.16		0.886652	1.20947		1.36409		17	16
eIF2 alpha (Phospho-Ser51)	353.33	702.83		0.06	0.23		0.873865	0.954932		1.09277		6	23
P70S6K (Phospho-Ser424)	502.83	842.33		0.14	0.27		1.24361	1.14447		0.920278		14	27
AMPK1 (Phospho-Thr174)	446.17	749		0.19	0.25		1.10348	1.01766		0.922231		19	25
GSK3 beta (Ab-9)	322.17	429		0.14	0.07		0.7968	0.58288		0.731527		14	7
PDK1 (Ab-241)	2400	3006.17		0.11	0.3		5.93575	4.08447		0.688114		11	30
GSK3 alpha (Ab-21)	400.83	525.83		0.05	0.09		0.991344	0.714443		0.720681		5	9
PTEN (Ab-380)	543	573.83		0.06	0.04		1.34296	0.77966		0.580553		6	4
AKT (Ab-473)	494.67	377.5		0.1	0.1		1.22343	0.512908		0.419237		10	10
AKT (Ab-308)	469.5	496.5		0.13	0.16		1.16118	0.674592		0.580954		13	16
PTEN (Ab-380/382/383)	363.17	583.17		0.06	0.59		0.898202	0.792351		0.882152		6	59
PTEN (Ab-370)	344.67	826.83		0.08	0.53		0.852447	1.12341		1.31786		8	53
BAD (Ab-112)	399.33	837.67		0.14	0.5		0.987634	1.13814		1.15239		14	50
BAD (Ab-136)	306.5	510		0.24	0.22		0.758044	0.692935		0.914109		24	22
BAD (Ab-155)	297	557.83		0.19	0.13		0.734549	0.757921		1.03182		19	13
AKT2 (Ab-474)	368.83	571.17		0.13	0.26		0.9122	0.776046		0.850741		13	26
mTOR (Ab-2448)	316	573.33		0.08	0.13		0.78154	0.778981		0.996726		8	13
4E-BP1 (Ab-36)	293.17	706.17		0.04	0.18		0.725076	0.95947		1.32327		4	18
4E-BP1 (Ab-45)	317.17	701		0.04	0.2		0.784434	0.952446		1.21418		4	20
eIF4E (Ab-209)	292.83	679.17		0.04	0.18		0.724235	0.922785		1.27415		4	18
ERK1-p44/42 MAP Kinase (Ab-202)	335.67	731		0.1	0.26		0.830188	0.993207		1.19636		10	26
ERK1-p44/42 MAP Kinase (Ab-204)	280.17	561.33		0.05	0.14		0.692924	0.762677		1.10066		5	14
P70S6K (Ab-411)	277.33	634.67		0.09	0.06		0.6859	0.862323		1.25721		9	6
eIF2 alpha (Ab-51)	552	753.17		0.16	0.1		1.36522	1.02333		0.74957		16	10
P70S6K (Ab-424)	280	663.67		0.03	0.06		0.692504	0.901726		1.30212		3	6
AMPK1 (Ab-174)	270.33	670.33		0.1	0.1		0.668588	0.910774		1.36224		10	10
GSK3a-b (Phospho-Tyr216/279)	238.33	741.67		0.09	0.19		0.589444	1.0077		1.70958		9	19
P70S6K (Phospho-Thr421)	257.33	719.5		0.09	0.13		0.636436	0.977582		1.53603		9	13
4E-BP1 (Phospho-Ser65)	373.17	861.5		0.19	0.13		0.922934	1.17052		1.26826		19	13
4E-BP1 (Phospho-Thr70)	296.5	788.67		0.12	0.1		0.733312	1.07156		1.46126		12	10
AKT1 (Phospho-Thr450)	301.67	838.5		0.15	0.12		0.746098	1.13927		1.52697		15	12
AKT1 (Phospho-Ser124)	297.33	814		0.17	0.25		0.735365	1.10598		1.50399		17	25
AMPKbeta1 (Phospho-Ser182)	334	661.5		0.17	0.16		0.826058	0.898777		1.08803		17	16
AKT1S1 (Phospho-Thr246)	342.17	567.17		0.12	0.06		0.846264	0.770611		0.910604		12	6
P70S6K (Phospho-Thr229)	281	494		0.09	0.06		0.694977	0.671196		0.965781		9	6
P70S6K (Phospho-Ser371)	354	483.67		0.12	0.03		0.875522	0.65716		0.750592		12	3
P70S6K (Phospho-Thr389)	298.5	413.33		0.06	0.05		0.738258	0.56159		0.760695		6	5
P70S6K (Phospho-Ser418)	377	431		0.1	0.1		0.932407	0.585598		0.62805		10	10
P90RSK (Phospho-Thr359/Ser363)	964.5	1811		0.3	0.5		2.38543	2.4606		1.03151		30	50
P90RSK (Phospho-Ser380)	709.33	483.83		0.34	0.05		1.75433	0.657378		0.374716		34	5
P90RSK (Phospho-Thr573)	764	621.33		0.13	0.08		1.88955	0.844198		0.446773		13	8
PP2A-a (Phospho-Tyr307)	627.33	1029.83		0.08	0.1		1.55153	1.39923		0.901836		8	10
Tuberin/TSC2 (Phospho-Ser939)	535.5	1304.33		0.06	0.23		1.32441	1.77219		1.33809		6	23
Tuberin/TSC2 (Phospho-Thr1462)	560.67	741.17		0.08	0.17		1.38666	1.00702		0.726221		8	17
AKT1 (Phospho-Tyr474)	595.33	607.33		0.11	0.09		1.47239	0.825177		0.560435		11	9
AKT1 (Phospho-Ser246)	567.33	631		0.14	0.17		1.40314	0.857337		0.611015		14	17
AKT1 (Phospho-Thr72)	486.17	807.33		0.15	0.29		1.20241	1.09692		0.912265		15	29
eIF4B (Phospho-Ser422)	496.17	857.33		0.14	0.08		1.22714	1.16485		0.949239		14	8
eIF4G (Phospho-Ser1108)	542	977.5		0.12	0.21		1.34049	1.32812		0.990776		12	21
mTOR (Phospho-Ser2481)	424.33	1091.5		0.07	0.43		1.04946	1.48302		1.41312		7	43
PKC alpha/beta II (Phospho-Thr638)	500.83	950.17		0.1	0.43		1.23867	1.29099		1.04224		10	43
6-phosphofructo-2-kinase/fructose-2,6-biphosphatase 2 (PFKFB2) (Phospho-Ser483)	324	708.17		0.06	0.14		0.801326	0.962187		1.20074		6	14
PKC alpha (Phospho-Tyr657)	571.83	907.67		0.21	0.12		1.41427	1.23325		0.872005		21	12
AKT (Phospho-Tyr326)	551.17	770.83		0.1	0.07		1.36317	1.04732		0.768301		10	7
BAD (Phospho-Ser91/128)	449	801.5		0.18	0.13		1.11048	1.08899		0.980653		18	13
BAD (Phospho-Ser134)	346.17	580.5		0.07	0.06		0.856157	0.788723		0.921236		7	6
ERK3 (Phospho-Ser189)	509.5	802		0.15	0.16		1.26011	1.08967		0.864746		15	16
ERK8 (Phospho-Thr175/Tyr177)	483.67	851		0.07	0.07		1.19623	1.15625		0.966582		7	7
mTOR (Phospho-Thr2446)	413.5	661.5		0.05	0.05		1.02268	0.898777		0.878845		5	5
PI3-kinase p85-subunit alpha/gamma (Phospho-Tyr467/Tyr199)	367.33	646.83		0.21	0.14		0.908491	0.878845		0.967368		21	14
PI3-kinase p85-alpha (Phospho-Tyr607)	287.5	803.5		0.11	0.15		0.711053	1.09171		1.53535		11	15
Rho/Rac guanine nucleotide exchange factor 2 (Phospho-Ser885)	300.17	752		0.04	0.13		0.742389	1.02174		1.37629		4	13
P70S6k-beta (Phospho-Ser423)	381	795.67		0.04	0.13		0.9423	1.08107		1.14727		4	13
RSK1/2/3/4 (Phospho-Ser221/227/218/232)	276	622.5		0.04	0.23		0.682611	0.845788		1.23905		4	23
PPAR-b (Phospho-Thr1457)	304	636		0.1	0.1		0.751861	0.86413		1.14932		10	10
PPAR-r (Phospho-Ser112)	281.83	537		0.1	0.02		0.69703	0.72962		1.04676		10	2
PIP5K (Phospho-Ser307)	240.17	421.67		0.13	0.05		0.593995	0.572921		0.964522		13	5
Mnk1 (Phospho-Thr385)	471.33	786.67		0.11	0.05		1.16571	1.06885		0.916908		11	5
IR (Phospho-Tyr1355)	638.33	483.17		0.15	0.11		1.57874	0.656481		0.415827		15	11
IR (Phospho-Tyr1361)	1124.67	975.83		0.28	0.15		2.78156	1.32586		0.476658		28	15
AMPK1/AMPK2 (Ab-485/491)	766.67	562.17		0.06	0.33		1.89615	0.763818		0.402826		6	33
P70S6K (Ab-421)	589	901.5		0.04	0.52		1.45673	1.22486		0.840831		4	52
GSK3a-b (Ab-216/279)	483.17	810		0.11	0.25		1.19499	1.10054		0.920965		11	25
4E-BP1 (Ab-65)	4323.5	4907.5		0.26	0.69		10.693	6.6678		0.623567		26	69
4E-BP1 (Ab-70)	542	644.83		0.29	0.05		1.34049	0.876128		0.653588		29	5
AKT1 (Ab-450)	482.5	702		0.21	0.14		1.19333	0.953804		0.799278		21	14
AKT1 (Ab-124)	695.83	895		0.11	0.15		1.72095	1.21603		0.706607		11	15
AMPKbeta1 (Ab-182)	942.17	1247.5		0.19	0.24		2.3302	1.69497		0.727394		19	24
AKT1S1 (Ab-246)	3749.17	3505.67		0.16	0.26		9.27255	4.76314		0.513682		16	26
P70S6K (Ab-229)	591	846.83		0.07	0.17		1.46168	1.15058		0.787167		7	17
P70S6K (Ab-371)	505.33	757.5		0.13	0.06		1.2498	1.02921		0.823504		13	6
P70S6K (Ab-418)	348.67	751		0.12	0.14		0.86234	1.02038		1.18327		12	14
P90RSK (Ab-359/363)	7266.67	5903.83		0.13	0.2		17.9721	8.02151		0.44633		13	20
P90RSK (Ab-380)	447	712.83		0.2	0.28		1.10553	0.968519		0.876066		20	28
P90RSK (Ab-573)	1534.83	1368.5		0.36	0.07		3.79598	1.85938		0.489827		36	7
PP2A-a (Ab-307)	3562	2394.33		0.19	0.12		8.80964	3.25317		0.369274		19	12
RhoA (Ab-188)	911.33	1099.67		0.15	0.08		2.25393	1.49412		0.662895		15	8
Tuberin/TSC2 (Ab-939)	826.17	1107.17		0.3	0.07		2.04331	1.50431		0.736212		30	7
Tuberin/TSC2 (Ab-1462)	254.33	741		0.19	0.17		0.629016	1.00679		1.60059		19	17
AKT1 (Ab-474)	378.33	1367.5		0.12	0.19		0.935696	1.85802		1.9857		12	19
AKT1 (Ab-246)	249.83	821.67		0.08	0.46		0.617886	1.1164		1.8068		8	46
AKT1 (Ab-72)	265.5	580.67		0.04	0.18		0.656642	0.788954		1.2015		4	18
eIF4G (Ab-1108)	486.5	1146.33		0.14	0.07		1.20323	1.55751		1.29445		14	7
mTOR (Ab-2481)	283.83	570.5		0.12	0.07		0.701976	0.775136		1.10422		12	7
PKC alpha/beta II (Ab-638)	274.5	495.83		0.11	0.03		0.678901	0.673682		0.992313		11	3
6-phosphofructo-2-kinase/fructose-2,6-biphosphatase 2 (PFKFB2) (Ab-483)	250.17	499		0.08	0.04		0.618727	0.677989		1.09578		8	4
PKC alpha (Ab-657)	263.83	446.17		0.09	0.04		0.652512	0.606209		0.92904		9	4
AKT (Ab-326)	448.17	667.83		0.16	0.07		1.10843	0.907378		0.818618		16	7
BAD (Ab-91/128)	687.5	500.67		0.26	0.12		1.70034	0.680258		0.400071		26	12
BAD (Ab-134)	996.33	497.33		0.16	0.06		2.46415	0.67572		0.27422		16	6
ERK3 (Ab-189)	528	638.83		0.25	0.46		1.30586	0.867976		0.664675		25	46
mTOR (Ab-2446)	468.33	918.67		0.19	0.29		1.15829	1.24819		1.07762		19	29
PI3-kinase p85-subunit alpha/gamma (Ab-467/199)	455.67	972.5		0.09	0.2		1.12698	1.32133		1.17246		9	20
Rho/Rac guanine nucleotide exchange factor 2 (Ab-885)	355.5	756.5		0.19	0.38		0.879232	1.02785		1.16903		19	38
P70S6K (Ab-427)	320.83	497.17		0.28	0.07		0.793486	0.675503		0.851311		28	7
P70S6k-beta (Ab-423)	508.33	563.67		0.55	0.1		1.25722	0.765856		0.609168		55	10
RSK1/2/3/4 (Ab-221/227/218/232)	512.5	708.83		0.14	0.16		1.26753	0.963084		0.759812		14	16
Tuberin (Ab-981)	440.33	696.17		0.11	0.07		1.08904	0.945883		0.868551		11	7
PLK1 (Ab-210)	523.33	674		0.06	0.14		1.29431	0.915761		0.707526		6	14
PPAR-b (Ab-1457)	468.83	785.33		0.09	0.14		1.15952	1.06702		0.920227		9	14
PPAR-r (Ab-112)	2380.83	4226.67		0.2	0.3		5.88833	5.74276		0.975277		20	30
Mnk1 (Ab-385)	532.5	890.5		0.31	0.1		1.31699	1.20992		0.918697		31	10
ERK1/2 (N-term)	327.33	587.33		0.28	0.07		0.809561	0.798003		0.985722		28	7
6-Phosphofructo-2-Kinase (PFKFB2) (inter)	513.83	869		0.09	0.07		1.27082	1.18071		0.929091		9	7
CBPN (inter)	375.17	689.5		0.09	0.05		0.927881	0.936821		1.00963		9	5
CBP (inter)	311.5	565.67		0.05	0.11		0.77041	0.768573		0.997616		5	11
PIP5K (inter)	383	616.83		0.04	0.11		0.947246	0.838084		0.884759		4	11
LRP11 (inter)	335.5	566		0.06	0.12		0.829768	0.769022		0.926792		6	12
LRP3 (inter)	427	626		0.12	0.05		1.05607	0.850543		0.805387		12	5
Beta actin	6585.83	4661.5		0.14	0.24		16.2883	6.33356		0.388842		14	24
GAPDH	337.67	636.17		0.05	0.16		0.835135	0.864361		1.035		5	16
												0	0
Average of Empty Spots on the Array	405.25	510.295		0.112478	0.0251624				Min	0.27422		11.2478	2.51624
Average of Negative Controls on the Array	286.832	532		0.172419	0.497785				Max	1.9857		17.2419	49.7785
Average of Positive Marker Spots on the Array	13744	18474.7		0.128757	0.183193				Mean	0.971755		12.8757	18.3193

## Sheet: COMBINE SLC38A10KO V WT CHANGES
Phospho Explorer Array WT VS SNAT10 KO
	Basal	Starved	Refeed
	KO VS WT	KO S2HR VS WT S2HR	KO 1HR AA VS WT 1HR AA
Protein Name	Fold Changes	Fold Changes	Fold Changes
	SNAT10KO v Control WT	SNAT10KO v Control WT	SNAT10KO v Control WT
GSK3 beta (Phospho-Ser9)	0.814819	0.815988	1.09237
PDK1 (Phospho-Ser241)	0.9996	0.408564	1.07655
GSK3 alpha (Phospho-Ser21)	0.827103	0.536305	1.71829
PTEN (Phospho-Ser380)	0.754247	0.712618	1.81788
AKT (Phospho-Ser473)	0.824669	0.838135	1.03013
AKT (Phospho-Thr308)	0.789281	1.01175	0.920326
PTEN (Phospho-Ser380/Thr382/Thr383)	0.81301	1.15002	1.02888
PTEN (Phospho-Ser370)	0.779786	0.872778	0.90902
BAD (Phospho-Ser112)	0.907784	1.30652	1.08102
BAD (Phospho-Ser136)	0.777719	1.14263	0.893342
BAD (Phospho-Ser155)	0.868284	1.12904	1.23782
AKT2 (Phospho-Ser474)	0.856496	1.13561	0.96082
AMPK1/AMPK2 (Phospho-Ser485/491)	0.984209	1.22493	1.14372
mTOR (Phospho-Ser2448)	0.888436	0.981192	1.10979
4E-BP1 (Phospho-Thr36)	0.913186	1.00512	1.20531
4E-BP1 (Phospho-Thr45)	1.06377	0.954656	1.16775
eIF4E (Phospho-Ser209)	1.09042	1.32153	1.19984
ERK1-p44/42 MAP Kinase (Phospho-Thr202)	0.978206	1.27601	0.808785
ERK1-p44/42 MAP Kinase (Phospho-Tyr204)	1.04186	1.42643	0.998418
P70S6K (Phospho-Ser411)	1.24648	1.74254	1.36409
eIF2 alpha (Phospho-Ser51)	1.03963	0.811545	1.09277
P70S6K (Phospho-Ser424)	1.27131	0.766263	0.920278
AMPK1 (Phospho-Thr174)	1.31603	0.890817	0.922231
GSK3 beta (Ab-9)	0.998954	1.36592	0.731527
PDK1 (Ab-241)	0.735463	1.01272	0.688114
GSK3 alpha (Ab-21)	1.10892	1.41647	0.720681
PTEN (Ab-380)	0.972676	0.872775	0.580553
AKT (Ab-473)	0.819512	1.244	0.419237
AKT (Ab-308)	0.952834	1.70866	0.580954
PTEN (Ab-380/382/383)	0.850829	1.42204	0.882152
PTEN (Ab-370)	0.917351	1.88875	1.31786
BAD (Ab-112)	0.829226	0.835547	1.15239
BAD (Ab-136)	0.78246	0.668357	0.914109
BAD (Ab-155)	0.845957	1.05837	1.03182
AKT2 (Ab-474)	0.846481	1.26144	0.850741
mTOR (Ab-2448)	0.810063	1.45003	0.996726
4E-BP1 (Ab-36)	0.917522	1.44033	1.32327
4E-BP1 (Ab-45)	0.918607	1.6547	1.21418
eIF4E (Ab-209)	1.04551	1.46692	1.27415
ERK1-p44/42 MAP Kinase (Ab-202)	1.00685	1.42199	1.19636
ERK1-p44/42 MAP Kinase (Ab-204)	1.05029	1.3242	1.10066
P70S6K (Ab-411)	0.944584	1.23958	1.25721
eIF2 alpha (Ab-51)	0.921448	2.04604	0.74957
P70S6K (Ab-424)	1.12635	1.58277	1.30212
AMPK1 (Ab-174)	1.02141	1.46226	1.36224
GSK3a-b (Phospho-Tyr216/279)	1.02745	1.91665	1.70958
P70S6K (Phospho-Thr421)	1.09116	1.66542	1.53603
4E-BP1 (Phospho-Ser65)	1.30534	3.91929	1.26826
4E-BP1 (Phospho-Thr70)	1.3948	1.99925	1.46126
AKT1 (Phospho-Thr450)	1.23538	1.15922	1.52697
AKT1 (Phospho-Ser124)	1.39128	0.828269	1.50399
AMPKbeta1 (Phospho-Ser182)	1.40467	1.09111	1.08803
AKT1S1 (Phospho-Thr246)	1.31855	2.32633	0.910604
P70S6K (Phospho-Thr229)	1.21587	2.0799	0.965781
P70S6K (Phospho-Ser371)	1.28898	1.95881	0.750592
P70S6K (Phospho-Thr389)	1.32539	1.77035	0.760695
P70S6K (Phospho-Ser418)	1.26059	1.627	0.62805
P90RSK (Phospho-Thr359/Ser363)	0.99097	3.14579	1.03151
P90RSK (Phospho-Ser380)	0.853055	1.33946	0.374716
P90RSK (Phospho-Thr573)	0.803598	1.73317	0.446773
PP2A-a (Phospho-Tyr307)	0.819092	1.63294	0.901836
Tuberin/TSC2 (Phospho-Ser939)	0.864038	0.980479	1.33809
Tuberin/TSC2 (Phospho-Thr1462)	0.913472	1.03902	0.726221
AKT1 (Phospho-Tyr474)	0.790637	1.05772	0.560435
AKT1 (Phospho-Ser246)	0.80005	1.19166	0.611015
AKT1 (Phospho-Thr72)	0.894064	0.875768	0.912265
eIF4B (Phospho-Ser422)	0.824925	1.06973	0.949239
eIF4G (Phospho-Ser1108)	0.783952	1.12117	0.990776
mTOR (Phospho-Ser2481)	0.821274	0.83065	1.41312
PKC alpha/beta II (Phospho-Thr638)	0.740917	0.963006	1.04224
6-phosphofructo-2-kinase/fructose-2,6-biphosphatase 2 (PFKFB2) (Phospho-Ser483)	0.796325	0.705289	1.20074
PKC alpha (Phospho-Tyr657)	0.839275	1.04723	0.872005
AKT (Phospho-Tyr326)	0.903221	0.686772	0.768301
BAD (Phospho-Ser91/128)	0.945493	0.732277	0.980653
BAD (Phospho-Ser134)	1.04516	0.749747	0.921236
ERK3 (Phospho-Ser189)	1.0827	1.29215	0.864746
ERK8 (Phospho-Thr175/Tyr177)	1.12003	1.63784	0.966582
mTOR (Phospho-Thr2446)	1.06666	1.58101	0.878845
PI3-kinase p85-subunit alpha/gamma (Phospho-Tyr467/Tyr199)	0.99653	1.51609	0.967368
PI3-kinase p85-alpha (Phospho-Tyr607)	1.04605	1.22103	1.53535
Rho/Rac guanine nucleotide exchange factor 2 (Phospho-Ser885)	1.02797	0.85084	1.37629
P70S6k-beta (Phospho-Ser423)	1.01842	0.565211	1.14727
RSK1/2/3/4 (Phospho-Ser221/227/218/232)	1.02267	0.473149	1.23905
PPAR-b (Phospho-Thr1457)	1.02539	0.655284	1.14932
PPAR-r (Phospho-Ser112)	1.12226	2.06076	1.04676
PIP5K (Phospho-Ser307)	1.01139	1.51861	0.964522
Mnk1 (Phospho-Thr385)	0.87922	1.2474	0.916908
IR (Phospho-Tyr1355)	0.847725	1.33695	0.415827
IR (Phospho-Tyr1361)	0.687095	1.29274	0.476658
AMPK1/AMPK2 (Ab-485/491)	0.879004	1.05376	0.402826
P70S6K (Ab-421)	0.901654	0.493073	0.840831
GSK3a-b (Ab-216/279)	0.858495	0.318587	0.920965
4E-BP1 (Ab-65)	0.631117	0.448401	0.623567
4E-BP1 (Ab-70)	0.824714	0.287843	0.653588
AKT1 (Ab-450)	0.868673	0.316149	0.799278
AKT1 (Ab-124)	0.764683	0.363606	0.706607
AMPKbeta1 (Ab-182)	0.779479	0.347781	0.727394
AKT1S1 (Ab-246)	0.603467	0.341073	0.513682
P70S6K (Ab-229)	0.821585	0.357876	0.787167
P70S6K (Ab-371)	0.830936	0.419724	0.823504
P70S6K (Ab-418)	0.799665	0.507895	1.18327
P90RSK (Ab-359/363)	0.466543	0.654695	0.44633
P90RSK (Ab-380)	0.835623	0.581495	0.876066
P90RSK (Ab-573)	0.755929	0.713987	0.489827
PP2A-a (Ab-307)	0.649951	0.670358	0.369274
RhoA (Ab-188)	0.882621	0.928064	0.662895
Tuberin/TSC2 (Ab-939)	1.08321	1.01385	0.736212
Tuberin/TSC2 (Ab-1462)	1.18419	0.639192	1.60059
AKT1 (Ab-474)	1.30863	1.20761	1.9857
AKT1 (Ab-246)	1.14684	0.794266	1.8068
AKT1 (Ab-72)	1.12012	0.553584	1.2015
eIF4G (Ab-1108)	0.961753	0.672988	1.29445
mTOR (Ab-2481)	1.1395	1.02425	1.10422
PKC alpha/beta II (Ab-638)	1.05862	2.14372	0.992313
6-phosphofructo-2-kinase/fructose-2,6-biphosphatase 2 (PFKFB2) (Ab-483)	1.06268	2.74228	1.09578
PKC alpha (Ab-657)	1.05161	2.85193	0.92904
AKT (Ab-326)	1.00073	0.907247	0.818618
BAD (Ab-91/128)	0.638965	0.916054	0.400071
BAD (Ab-134)	0.849884	0.637994	0.27422
ERK3 (Ab-189)	1.04637	0.502603	0.664675
mTOR (Ab-2446)	1.17212	0.354091	1.07762
PI3-kinase p85-subunit alpha/gamma (Ab-467/199)	0.991568	0.421282	1.17246
Rho/Rac guanine nucleotide exchange factor 2 (Ab-885)	1.15416	0.474447	1.16903
P70S6K (Ab-427)	1.19749	0.521992	0.851311
P70S6k-beta (Ab-423)	1.08112	0.352013	0.609168
RSK1/2/3/4 (Ab-221/227/218/232)	1.06719	0.334222	0.759812
Tuberin (Ab-981)	1.22846	0.400698	0.868551
PLK1 (Ab-210)	1.24327	0.316539	0.707526
PPAR-b (Ab-1457)	1.24251	0.255138	0.920227
PPAR-r (Ab-112)	1.00178	0.54584	0.975277
Mnk1 (Ab-385)	1.0692	0.395321	0.918697
ERK1/2 (N-term)	1.15115	0.473622	0.985722
6-Phosphofructo-2-Kinase (PFKFB2) (inter)	0.951486	0.351128	0.929091
CBPN (inter)	1.10101	0.544159	1.00963
CBP (inter)	1.08745	0.728902	0.997616
PIP5K (inter)	1.15888	0.679631	0.884759
LRP11 (inter)	1.16869	0.970096	0.926792
LRP3 (inter)	1.00778	1.25726	0.805387
Beta actin	0.600605	1.09061	0.388842
GAPDH	0	0.784148	1.035
Min	0	0.255138	0.27422
Max	1.40467	3.91929	1.9857
Mean	0.968209	1.07658	0.971755

## Sheet: Phospho-protein Fold change
	KO Vs WT	KO Vs WT	KO Vs WT		KO Vs WT	KO Vs WT	KO Vs WT
Protein Name	Control	Starved	Refeed		Control	Starved	Refeed
AKT1S1 (P-Thr246)/AKT1S1	2.18495	6.82062	1.7727		2.18495	6.82062	0		TRUE	TRUE	FALSE	We have only considered phospho protein which has changed above 2 and below 0.5
mTOR (P-Thr2446) /mTOR	0.910028	4.46499	0.815543		0	4.46499	0		FALSE	TRUE	FALSE	Rest has given value as 0. For simplified data representation in heatmap.
AKT1 (P-Thr450)/AKT1	1.42214	3.66668	1.91043		0	3.66668	0		FALSE	TRUE	FALSE
AKT1 (P-Ser124)/AKT1	1.81941	2.27793	2.12846		0	2.27793	2.12846		FALSE	TRUE	TRUE
TSC2 (P-Thr1462)/Tuberin	0.771387	1.62551	0.453722		0	0	0.453722		FALSE	FALSE	TRUE
AKT1 (P-Thr72)/AKT1	0.798188	1.582	0.759273		0	0	0		FALSE	FALSE	FALSE
AKT1 (P-Ser246)/AKT1	0.697613	1.50033	0.338174		0	0	0.338174		FALSE	FALSE	TRUE
TSC2 (P-Ser939)/Tuberin	0.797668	0.967082	1.81754		0	0	0		FALSE	FALSE	FALSE
AKT2 (P-Ser474) /AKT2	1.01183	0.90025	1.12939		0	0	0		FALSE	FALSE	FALSE
AKT1 (P-Tyr474)/AKT1	0.604169	0.875882	0.282235		0	0	0.282235		FALSE	FALSE	TRUE
mTOR (P-Ser2481) /Mtor	0.720732	0.810981	1.27974		0	0	0		FALSE	FALSE	FALSE
AKT (P-Tyr326)/AKT	0.902564	0.756984	0.938534		0	0	0		FALSE	FALSE	FALSE
mTOR (P-Ser2448) /mTOR	1.09675	0.676672	1.11344		0	0	0		FALSE	FALSE	FALSE
AKT (P-Ser473) /AKT	1.00629	0.673744	2.45716		0	0	2.45716		FALSE	FALSE	TRUE
AKT (P-Thr308) /AKT	0.82835	0.592135	1.58416		0	0	0		FALSE	FALSE	FALSE
AMPKbeta1 (P-Ser182)/AMPKbeta1	1.80206	3.13734	1.4958		0	3.13734	0		FALSE	TRUE	FALSE
4E-BP1 (P-Ser65)/4E-BP1	2.0683	8.7406	2.03387		2.0683	8.7406	2.03387		TRUE	TRUE	TRUE
4E-BP1 (P-Thr70)/4E-BP1	1.69125	6.94564	2.23576		0	6.94564	2.23576		FALSE	TRUE	TRUE
P70S6K (P-Thr229)/P70S6K	1.47991	5.81178	1.22691		0	5.81178	0		FALSE	TRUE	FALSE
P70S6K (P-Ser371)/P70S6K	1.55124	4.66689	0.911462		0	4.66689	0		FALSE	TRUE	FALSE
P70S6K (P-Thr421)	1.21018	3.37763	1.8268		0	3.37763	0		FALSE	TRUE	FALSE
P70S6K (P-Ser418)/P70S6K	1.5764	3.20341	0.530775		0	3.20341	0		FALSE	TRUE	FALSE
eIF4G (P-Ser1108)/eIF4G	0.815128	1.66595	0.765404		0	0	0		FALSE	FALSE	FALSE
P70S6k-beta (P-Ser423)/P70S6k-beta	0.942008	1.60565	1.88334		0	0	0		FALSE	FALSE	FALSE
P70S6K (P-Ser411) /P70S6K	1.31961	1.40574	1.08501		0	0	0		FALSE	FALSE	FALSE
eIF4E (P-Ser209) /eIF4E	1.04295	0.900886	0.941679		0	0	0		FALSE	FALSE	FALSE
4E-BP1 (P-Thr36) /4E-BP1	0.995274	0.697842	0.91086		0	0	0		FALSE	FALSE	FALSE
4E-BP1 (P-Thr45) /4E-BP1	1.15802	0.576934	0.961756		0	0	0		FALSE	FALSE	FALSE
P70S6K (P-Ser424) /P70S6K	1.1287	0.484127	0.706752		0	0.484127	0		FALSE	TRUE	FALSE
eIF2 alpha (P-Ser51) /eIF2 alpha	1.12826	0.396642	1.45786		0	0.396642	0		FALSE	TRUE	FALSE
P90RSK (P-Thr359/Ser363)/P90RSK	2.12407	4.80498	2.3111		2.12407	4.80498	2.3111		TRUE	TRUE	TRUE
PPAR-r (P-Ser112)/PPAR-r	1.12027	3.77539	1.07329		0	3.77539	0		FALSE	TRUE	FALSE
PI3-kinase p85-subunit alpha/gamma (P-Tyr467/Tyr199)	1.005	3.59876	0.825077		0	3.59876	0		FALSE	TRUE	FALSE
PPAR-b (P-Thr1457)/PPAR-b	0.825254	2.56836	1.24895		0	2.56836	0		FALSE	TRUE	FALSE
P90RSK (P-Thr573)/P90RSK	1.06306	2.42745	0.912104		0	2.42745	0		FALSE	TRUE	FALSE
P90RSK (P-Ser380)/P90RSK	1.02086	2.30348	0.427726		0	2.30348	0.427726		FALSE	TRUE	TRUE
Rho/Rac guanine nucleotide exchange factor 2 (P-Ser885)	0.890669	1.79333	1.17728		0	0	0		FALSE	FALSE	FALSE
BAD (P-Ser136) /BAD	0.993941	1.70962	0.977282		0	0	0		FALSE	FALSE	FALSE
BAD (P-Ser112) /BAD	1.09474	1.56367	0.93807		0	0	0		FALSE	FALSE	FALSE
BAD (P-Ser134)/BAD	1.22977	1.17516	3.35947		0	0	3.35947		FALSE	FALSE	TRUE
AMPK1/AMPK2 (P-Ser485/491) /AMPK1/AMPK2	1.11969	1.16244	2.83924		0	0	2.83924		FALSE	FALSE	TRUE
BAD (P-Ser155) /BAD	1.02639	1.06677	1.19965		0	0	0		FALSE	FALSE	FALSE
PTEN (P-Ser380)/PTEN	0.775435	0.816497	3.1313		0	0	3.1313		FALSE	FALSE	TRUE
PTEN (P-Ser380/Thr382/Thr383) /PTEN	0.955551	0.808712	1.16633		0	0	0		FALSE	FALSE	FALSE
BAD (P-Ser91/128)/BAD	1.47973	0.799382	2.4512		0	0	2.4512		FALSE	FALSE	TRUE
AMPK1 (P-Thr174)/AMPK1	1.28844	0.609204	0.676997		0	0	0		FALSE	FALSE	FALSE
PTEN (P-Ser370) /PTEN	0.850042	0.462093	0.689767		0	0.462093	0		FALSE	TRUE	FALSE
PKC alpha/beta II (P-Thr638)	0.699887	0.449223	1.05032		0	0.449223	0		FALSE	TRUE	FALSE
PDK1 (P-Ser241) /PDK1	1.35914	0.403433	1.5645		0	0.403433	0		FALSE	TRUE	FALSE
PKC alpha (P-Tyr657)/PKC alpha	0.798084	0.367202	0.938609		0	0.367202	0		FALSE	TRUE	FALSE
PFKFB2 (P-Ser483) /PFKFB2	0.749356	0.257191	1.09579		0	0.257191	0		FALSE	TRUE	FALSE
