# Supplementary material for: SLC38A10 Regulate Glutamate Homeostasis and Modulate the AKT/TSC2/mTOR Pathway in Mouse Primary Cortex Cells
Source: Front Cell Dev Biol. 2022 Apr 5;10:854397. doi: 10.3389/fcell.2022.854397 (PMC9017388; doi:10.3389/fcell.2022.854397)
Supplement: Supplementary file 7 [file Table4.XLSX]

## Sheet: Information
Information regarding individual sheets
Each sheet provides detailed information regarding IPA analysis on list of changed gene list derived from Ampliseq analyisis at different conditions.
All changes mentioned are changed in SLC38A10 KO primary cortex cell w.r.t WT
Basal KO disease	Predicted disease and molecular functional changes due to SLC38A10 removal in primary cortex cell, specifically nervous sytem. Z-scores calculated through IPA predicted increase and decrease of receptive molecular function and disease.
Comparision analysis sheet	-Basal_B27 starved_amino acid starved_Amino acid refeed gene list -Diseases and Bio Functions
Upstream analysis	Upstream analysis to represent top upregultors in KO SLC38A10 PCCs

## Sheet: Basal KO disease
Categories	Diseases or Functions Annotation	p-value	Predicted Activation State	Activation z-score	Molecules	# Molecules
Cell Death and Survival, Neurological Disease, Organismal Injury and Abnormalities	Cell death of hippocampal cells	0.00617	Increased	2.068	ATF3,CTSD,FAS,NPAS4,PAWR,TGFB1,UCP2	7
Neurological Disease	Degeneration of nervous system	0.00121	Increased	2.158	CP,CSF1R,CTSD,CX3CR1,CYBB,HEXB,MSRB3,NPAS4,OSMR,SERPINE1,SLC12A7,TGFB1,TGFBR2,TGM2,TLR4,VEGFA,VIM	17
Neurological Disease	Neurodegeneration	0.00145	Increased	2.158	CP,CSF1R,CTSD,CX3CR1,CYBB,HEXB,MSRB3,NPAS4,OSMR,SERPINE1,SLC12A7,TGFB1,TGFBR2,TGM2,TLR4,VEGFA,VIM	17
Cellular Compromise, Neurological Disease, Organismal Injury and Abnormalities	Damage of neurons	0.0159	Increased	2.176	ANGPT2,CX3CR1,IGF2,PLP1,TGFB1,TGFBR2	6
Cell Death and Survival, Cellular Compromise, Neurological Disease, Tissue Morphology	Degeneration of neurons	0.00358	Increased	2.629	CP,CSF1R,CTSD,HEXB,MSRB3,NPAS4,OSMR,SERPINE1,SLC12A7,TGFB1,TGFBR2,TGM2,TLR4,VEGFA	14
Cellular Movement	Cell movement	1.46e-09	Decreased	-4.159	A2M,ACTN4,AHNAK,ANGPT2,ANXA2,APOD,CASP8,CD44,COL18A1,COL3A1,CXCL10,DAAM2,EFEMP1,EGR1,EGR2,FAS,GLI1,ICAM1,IGFBP2,KDR,LMX1A,LPAR1,LRP2,MMP2,Nes,PLAU,PLAUR,PROM1,PTGDS,SELPLG,SERPINE1,SHC1,SPP1,TGFB1,TGFBR2,TLR4,TWIST1,VEGFA,VIM,VSTM5,VTN	41
Cellular Movement	Cell movement of tumour cell lines	9.91e-10	Decreased	-3.819	A2M,ACTN4,AHNAK,ANGPT2,ANXA2,CASP8,COL18A1,DAAM2,EFEMP1,EGR1,GLI1,IGFBP2,LPAR1,MMP2,PLAU,PLAUR,PROM1,SERPINE1,SHC1,SPP1,TGFB1,TLR4,TWIST1,VEGFA,VTN	25
Cellular Movement	Migration of cells	1.24e-07	Decreased	-3.328	A2M,AHNAK,ANGPT2,ANXA2,APOD,CASP8,CD44,COL18A1,COL3A1,CXCL10,DAAM2,EGR1,EGR2,FAS,GLI1,ICAM1,IGFBP2,KDR,LMX1A,LPAR1,MMP2,Nes,PLAU,PLAUR,PROM1,PTGDS,SELPLG,SERPINE1,SHC1,TGFBR2,TLR4,TWIST1,VEGFA,VIM,VSTM5	35
Cellular Movement	Migration of tumour cell lines	7.75e-08	Decreased	-3.135	A2M,AHNAK,ANGPT2,ANXA2,CASP8,COL18A1,DAAM2,EGR1,GLI1,IGFBP2,LPAR1,MMP2,PLAU,PLAUR,PROM1,SERPINE1,SHC1,TLR4,TWIST1,VEGFA	20
Tissue Morphology	Quantity of cells	1.35e-05	Decreased	-3.074	A2M,ALDH1A2,ANGPT2,ANXA1,ARC,BMP6,CP,CSF1,CSF1R,CTSD,CX3CR1,CXCL10,CYBB,EGR1,EGR2,FOS,GLI1,HEYL,HFE,IGF2,LEPR,LIF,LMX1A,LPAR1,MSN,Nes,NOTCH2,NPAS4,PLAUR,SERPINF1,SERPING1,SPP1,TLR4,TYROBP,VEGFA	35
Cell-To-Cell Signalling and Interaction	Activation of cells	0.0031	Decreased	-2.598	ANGPT2,C5AR1,CD36,CX3CR1,CXCL10,CYBB,LEPR,LGALS3,LIF,TAC1,TLR4,VIM	12
Cell-To-Cell Signalling and Interaction, Hematological System Development and Function	Activation of myeloid cells	0.00695	Decreased	-2.425	CD36,CX3CR1,CXCL10,CYBB,LGALS3,TLR4	6
Cell-To-Cell Signalling and Interaction, Nervous System Development and Function	Activation of neuroglia	0.00835	Decreased	-2.401	C5AR1,CD36,CXCL10,CYBB,LGALS3,TLR4,VIM	7
Cell Death and Survival	Cell viability	0.00385	Decreased	-2.378	CSF1,CX3CR1,CYBB,EGR1,EHD4,HLA-A,IGF2,KDR,LIF,LMX1A,Nes,PLAU,SERPINF1,SLC40A1,TGFB1,TGM2,VEGFA	17
Cellular Development, Cellular Growth and Proliferation, Nervous System Development and Function, Tissue Development	Proliferation of neuronal cells	0.00655	Decreased	-2.238	CSF1,CX3CR1,EGR1,FAM107A,FAS,ID3,ITGA1,LIF,LPAR1,MYO10,NPAS4,PALLD,SHC1,SPP1,SYK,TGFB1,TGM2,TLR7,VEGFA,VIM	20
Embryonic Development, Nervous System Development and Function, Organ Development, Organismal Development,Tissue Development	Formation of forebrain	0.0462	Decreased	-2.236	ADGRA2,ALDH1A2,CSF1R,FEZF2,FOXD1,FOXJ1,ITGAM,LRP2,OSMR,TGFB1,TYROBP,VEGFA	12
Cellular Movement	Cell movement of neuroblastoma cell lines	0.00102	Decreased	-2.22	ANGPT2,CASP8,DAAM2,LPAR1,SERPINE1,VTN	6
Cell-To-Cell Signalling and Interaction, Hematological System Development and Function, Immune Cell Trafficking, Inflammatory Response, Nervous System Development and Function	Activation of microglia	0.0244	Decreased	-2.216	CD36,CXCL10,CYBB,LGALS3,TLR4	5
Lipid Metabolism, Small Molecule Biochemistry	Synthesis of lipid	0.0167	Decreased	-2.2	ALDH1A2,EGR1,FOS,GPER1,HPGDS	5
Cellular Movement	Migration of neuroblastoma cell lines	0.000521	Decreased	-2.19	ANGPT2,CASP8,DAAM2,LPAR1,SERPINE1	5
Nervous System Development and Function, Tissue Morphology	Quantity of neuroglia	0.0209	Decreased	-2.186	ANGPT2,CSF1,CSF1R,LIF,LPAR1,TYROBP	6
Nervous System Development and Function	Development of central nervous system	0.0167	Decreased	-2.178	ADGRA2,ALDH1A2,COL3A1,COL4A1,CSF1R,DIO3,EGR1,EGR2,FEZF2,FOXC1,FOXD1,FOXJ1,GLI1,ITGAM,LMX1A,LRP2,OSMR,PLP1,ROR1,TGFB1,TGFBR2,THBS1,THBS2,TLR4,TYROBP,VEGFA,VIM,WLS	28
Cell-To-Cell Signalling and Interaction	Activation of central nervous system cells	0.0105	Decreased	-2.169	ANGPT2,C5AR1,CD36,LIF,TLR4,VIM	6
Cellular Movement	Invasion of tumour cell lines	0.000581	Decreased	-2.077	CCKBR,DAAM2,DLK1,FAM107A,GLI1,IGFBP2,MMP2,PLAUR,TGFB1	9
Nervous System Development and Function, Tissue Morphology	Quantity of neurons	0.0034	Decreased	-2.074	A2M,ALDH1A2,ARC,CP,CSF1,CTSD,CX3CR1,CYBB,EGR1,EGR2,FOS,HEYL,LIF,LMX1A,LPAR1,MSN,NPAS4,PLAUR,SERPINF1,SERPING1,SPP1,TLR4,VEGFA	23
Free Radical Scavenging	Production of superoxide	0.000333	Decreased	-2	CYBA,ITGAM,NCF1,TYROBP	4
Cancer, Organismal Injury and Abnormalities	Neoplasia of cells	0.0139	Decreased	-2	CASP8,IGFBP2,PLAUR,PTGDS	4

## Sheet: Comparision analysis
© 2000-2021 QIAGEN. All rights reserved.
Diseases and Bio Functions	basal - 2021-03-08 09:28 PM	b27 starved - 2021-03-08 09:37 PM	AA starved - 2021-03-08 09:40 PM	refeed - 2021-03-08 09:45 PM
Cell movement	-4.159	-2.468	-3.345	-0.547
Cell movement of tumour cell lines	-3.819	-2.075	-3.111	-0.536
Migration of cells	-3.328	-2.143	-2.678	-0.899
Migration of tumour cell lines	-3.135	-2.025	-2.275	-1.294
Damage of nervous system	1.515	1.69	1.576	2.578
Cell viability	-2.378	-1.536	-2.657	0.723
Quantity of cells	-3.074	-2.013	-0.773	-0.697
Injury of nervous system	1.182	1.32	1.286	2.384
Production of reactive oxygen species	-1.941	-0.589	-2.393	N/A
Production of superoxide	-2	-0.594	-2.186	N/A
Degeneration of nervous system	2.158	0.766	0.736	0.911
Neurodegeneration	2.158	0.766	0.736	0.873
Brain damage	0.568	0.625	0.701	2.186

## Sheet: Upstream analysis_Basal _KO
Upstream Regulator	Expr Log Ratio	Molecule Type	Predicted Activation State	Activation z-score	Flags	p-value of overlap	Target Molecules in Dataset
IFNG		cytokine	Inhibited	-3.94	bias	1.63e-11	CASP8,CD14,CD68,CSF1,CXCL10,CXCL16,EGR2,FAM107A,FAS,FOSB,GBP2,GJB2,GPER1,ICAM1,IFI16,IRF5,IRF8,LIF,LOX,P2RY6,PLAU,S1PR3,SOD3,TGFBR2,TLR4,VEGFA
TNF		cytokine	Inhibited	-3.255	bias	9.63e-07	ADAM8,CD14,CD44,CSF1,CXCL10,CXCL16,FAS,ICAM1,LGALS9B,PLAU,VIM
HTT	0.057	transcription regulator	Inhibited	-3.207	bias	6.5e-05	COL18A1,COL4A1,CRYAB,CSF1R,DCN,EGR1,EGR2,EMP3,FOS,IGF2,MGP,MMP2,PRELP,PROM1,PSMB8,SERPINF1,SERPING1,SLC40A1,SPP1,TGM2,THBS2
MKNK1	-0.144	kinase	Inhibited	-3	bias	0.000679	ANXA2,ANXA5,CP,FOS,FOSB,GPC4,PLTP,SPARC,VIM
SOX2	-0.45	transcription regulator	Inhibited	-2.72	bias	0.000804	CASR,CLDN11,COL11A2,CTNNAL1,GJC3,ID3,LPAR1,MOBP,PLP1,PROM1,TSPAN15
FEV		transcription regulator	Inhibited	-2.449	bias	0.0167	ANXA2,FOS,JAM2,LPAR1,VIM,VTN
QKI	-0.605	other	Inhibited	-2.449	bias	9.63e-05	ATP6V0D2,CD36,CNN1,CTSS,ITGAM,VIM
SREBF1	-0.385	transcription regulator	Inhibited	-2.449	bias	0.00135	C5AR1,CD14,GPNMB,HFE,PLEKHA4,TNFRSF1B
IL1B		cytokine	Inhibited	-2.367	bias	0.000542	CSF1,CXCL10,FAS,FOS,ICAM1,PLAU,VIM
CSF1	-3.08	cytokine	Inhibited	-2.354		1.08e-11	CSF1,CTSD,CTSH,EGR2,GPNMB,GPR34,HLA-A,ITGAM,PTPRC,SPARC,SPI1,SPP1,TGFB1
APEX1	-0.291	enzyme	Inhibited	-2.219	bias	1.17e-05	EGR1,EGR2,FOS,FOSB,NPAS4
STAT1		transcription regulator	Inhibited	-2.219	bias	0.000955	CXCL10,GBP2,ICAM1,IFI16,IRF8,Oasl2
CREB1	0.097	transcription regulator	Inhibited	-2.159	bias	0.000244	ARC,ATF3,EGR1,EGR2,FOS,FOSB,MNS1,VEGFA
ADORA2A	0.799	G-protein coupled receptor	Activated	2		0.164	CSF1R,EGR2,FOS,SPARC
PTGER4	0.422	G-protein coupled receptor	Activated	2.035	bias	0.000487	CP,Ctla2a/Ctla2b,CXCL10,CYBB,GBP2,IFI16,Irgm1,NCF1,NCF2,TLR8
Irgm1	-2.491	other	Activated	2.169	bias	0.00816	CXCL10,CXCL16,GBP2,IFI16,Oasl2
TSC2	0.3	other	Activated	3.771	bias	5.24e-15	A2M,ANXA1,ANXA2,ARC,ATF3,CP,CRYAB,CXCL10,EMP3,FAM107A,FOS,GPNMB,LGALS3,MGP,PRELP,RASSF4,UCP2,VAMP8
BDNF		growth factor				0.000535	ARC,CD36,EGR1,EGR2,FOS,LGALS1,PLP1,TAC1,THBS1
