# Supplementary material for: SLC38A10 Regulate Glutamate Homeostasis and Modulate the AKT/TSC2/mTOR Pathway in Mouse Primary Cortex Cells
Source: Front Cell Dev Biol. 2022 Apr 5;10:854397. doi: 10.3389/fcell.2022.854397 (PMC9017388; doi:10.3389/fcell.2022.854397)
Supplement: Supplementary file 8 [file Table1.XLSX]

## Sheet: Sheet1
Annotated	Customer sample Identifier	Replicate	From 6-well plate	case-control	runorder (minutes)	Injection Standard	Internal Standard 01	Internal Standard 02	Internal Standard 03	Internal Standard 04	1-monopalmitin	1-stearoyl-sn-glycero-3-phosphocholine	4-aminobutyric acid	5,8,11-eicosatrienoic acid, (Z)-	aconitic acid, trans/cis	adipic acid	alanine	alpha-ketoglutaric acid	aminomalonic acid	asparagine	asparagine [-h2o]	azelaic acid	beta-d-glucopyranose	cholesta-3,5-diene	cholestadiene	cholesterol	citric acid	creatinine	cysteine	dihydroxyacetone phosphate	dodecanoic acid	fructose/sorbose	fructose-6-phosphate	fumaric acid	glucose/mannose/galactose	glucose-6-phosphate	glutamic acid	glutamine	glyceric acid	glycerol-2-phosphate	glycerol-3-phosphate	glycine	glycolic acid	hexadecanoic acid	hypotaurine	hypoxanthine	inositol, myo-	inositol, scyllo-	inositol-phosphate
Metabolite Feature						Internal Standards	Internal Standards	Internal Standards	Internal Standards	Internal Standards	Annotated Metabolite	Annotated Metabolite	Annotated Metabolite	Annotated Metabolite	Annotated Metabolite	Annotated Metabolite	Annotated Metabolite	Annotated Metabolite	Annotated Metabolite	Annotated Metabolite	Annotated Metabolite	Annotated Metabolite	Annotated Metabolite	Annotated Metabolite	Annotated Metabolite	Annotated Metabolite	Annotated Metabolite	Annotated Metabolite	Annotated Metabolite	Annotated Metabolite	Annotated Metabolite	Annotated Metabolite	Annotated Metabolite	Annotated Metabolite	Annotated Metabolite	Annotated Metabolite	Annotated Metabolite	Annotated Metabolite	Annotated Metabolite	Annotated Metabolite	Annotated Metabolite	Annotated Metabolite	Annotated Metabolite	Annotated Metabolite	Annotated Metabolite	Annotated Metabolite	Annotated Metabolite	Annotated Metabolite	Annotated Metabolite
Compound Name						I100 Octadecanoic acid methyl ester, n- Mz 298 1 M/z299	I102 SUCCINIC ACID-D4 2TMS Mz 251 1 M/z266	I007 MYRISTIC ACID-13C3 1TMS 1 M/z303	I109 HEXADECANOIC ACID-13C4 1TMS Mz 332 1 M/z333	I001 SUCROSE-13C12 8TMS 1 M/z458	P027 1-Monopalmitin 2TMS 1 M/z460	W084 1-STEAROYL-sn-GLYCERO-3-PHOSPHOCHOLINE 1TMS 1 M/z641	S057 4-AMINOBUTYRIC ACID 3TMS major 1 M/z305	5,8,11-Eicosatrienoic acid, (Z)-, TMS 2369	S079 ACONITIC ACID, trans- 3TMS 1 M/z229	S083 ADIPIC ACID 2TMS 1 M/z276	S087 ALANINE 2TMS 1 M/z233	S091 ALPHA-KETOGLUTARIC ACID-MEOX 2TMS 1 M/z319	W116 Aminomalonic acid 3TMS 1 M/z232	W027 ASPARAGINE 3TMS major 1 M/z231	W119 Asparagine [-H2O] 2TMS 1 M/z243	S110 AZELAIC ACID 2TMS 1 M/z317	W134 beta-D-Glucopyranose 5TMS 1 M/z435	P076 Cholestadiene nTMS 1 M/z368	P072 Cholestadiene nTMS 1 M/z368	W065 CHOLESTEROL 1TMS 1 M/z458	S140 CITRIC ACID 4TMS 1 M/z466	S147 CREATININE 3TMS 1 M/z332	S151 CYSTEINE 3TMS 1 M/z232	S164 DIHYDROXYACETONE PHOSPHATE-MEOX 1TMS major 2 M/z402	S168 DODECANOIC ACID 1TMS 1 M/z258	S199 FRUCTOSE-MEOX 5TMS major 1 M/z335	S198 FRUCTOSE-6-PHOSPHATE-MEOX 6TMS 1 M/z461	FUMARIC ACID 2TMS	S228 GLUCOSE-MEOX 5TMS major 1 M/z364	S226 GLUCOSE-6-PHOSPHATE-MEOX 6TMS major 1 M/z472	S234 GLUTAMIC ACID 3TMS major 1 M/z258	S237 GLUTAMINE 3TMS minor 1 M/z229	S241 GLYCERIC ACID 3TMS 1 M/z307	X063 GLYCEROL-2-PHOSPHATE 4TMS 1 M/z446	X062 GLYCEROL-3-PHOSPHATE 4TMS 1 M/z446	W034 GLYCINE 2TMS minor 1 M/z204	W001 GLYCOLIC ACID 2TMS 1 M/z206	S257 HEXADECANOIC ACID 1TMS 1 M/z328	Hypotaurine-nTMS	S268 HYPOXANTHINE 2TMS 1 M/z280	INOSITOL, myo- 6TMS	W088 INOSITOL, scyllo- 6TMS 1 M/z318	W137 Inositol-phosphate 7TMS 1 M/z470
RI (resolved)						2125	1317	1845	2043	2628	2581	3224	1528	2369	1744	1504	1125	1572	1468	1664	1499	1792	1974	2904	2776	3156	1813	1550	1552	1737	1650	1866	2297	1355	1892	2309	1617	1471	1334	1718	1756	1142	1101	2043	1594	1799	2083	2023	2405
M/z (unique)						299	266	303	333	458	460	641	305	363	229	276	233	319	232	231	243	317	435	368	368	458	466	332	232	402	258	335	461	245	364	472	258	229	307	446	446	204	206	328	310	280	305	318	470
RSD (%)						28.1	18.34	36.34	29.76	28.8	45.18	61.85	66.64	59.39	68.03	38.55	50.39	53.92	65.76	82.54	63.97	24.24	116.47	81.5	61.93	44.77	80.21	41.02	51.09	98.7	36	59.15	57.16	53.1	67.24	62.65	45.67	81.05	51.4	41.23	56.27	58.49	16.97	37.12	44.55	69.94	64.7	82.91	71.99
1	WT Basal _1	1A	1	WT Basal _1	129.87	4943869	5734970	2164069	1273661	1931018	86162	389593	15281426	808631	4635770	690421	269338	144516	562154	1168981	6528941	1976592	61056	186109	63914	232658710	11392282	837996	1460087	41265	3936199	125568	158862	2.79717e+07	6472242	395022	20665340	1047023	304333	240376	4215284	29308789	235236	16775211	671839	1024223	5.18753e+07	379898	1810838
2	WT Basal _2	1B	1	WT Basal _2	245.29	6667163	5960487	3030589	1650544	2262706	143466	407753	24890489	1.21941e+06	6837503	779326	316247	255229	821309	1140114	8810544	2159259	77546	768365	103736	249371256	18306458	925132	1761862	39101	5263000	191487	262982	3.35254e+07	10210771	732289	24997132	1501757	415959	328381	7283030	32022958	262434	22590360	1.68288e+06	451824	9.28821e+07	685263	2466598
3	WT Basal _3	1C	1	WT Basal _3	259.96	6654409	5794860	2949103	1670159	2211027	110004	226079	13676811	921092	4321888	618521	202406	123073	595235	727574	4297227	2446642	106620	716885	125537	188536712	11513495	546969	907452	34323	3289574	118485	105446	2.02332e+07	6489346	244811	18385987	1012154	285903	268252	3972174	19863093	243632	21087002	642867	800606	5.24838e+07	353932	1531238
4	WT Basal _4	1D	1	WT Basal _4	404.16	7640714	5496824	3227642	1832523	2349153	134516	199640	14650487	925380	3571310	456005	162247	142375	713177	625338	3841255	2665261	70994	1159335	131076	194575835	11913567	525229	774191	27257	3527686	121199	103145	1.83481e+07	7997881	268930	20391149	838851	245364	309608	4254393	14333691	228478	24487485	569282	583683	3.63251e+07	295426	1571599
5	WT -B27 _1	2A	2	WT -B27 _1	231	6778645	6013101	2773090	1613809	2214421	156507	496946	20671574	775750	2088508	2216084	629745	198483	1818387	1004785	6949413	2050612	111895	633838	92090	284282381	6404299	976369	3315925	250846	9137240	488673	231523	2.49909e+07	10277107	745237	24211683	4051656	243296	381036	11621063	105682908	253963	23384869	1.72251e+06	191646	7.39489e+07	202948	2772336
6	WT -B27 _2	2B	2	WT -B27 _2	303.15	7397357	5601946	3031731	1586948	2249828	170428	498257	20943113	887703	1957503	1056284	571185	182993	2449897	593843	6291227	3023967	80708	871385	133100	295176106	5942677	1107909	2886036	456815	9435242	664900	319523	2.69008e+07	8287769	994986	20909677	3738821	340751	417152	15138981	96834480	281198	26084993	1.73664e+06	190002	8.34196e+07	273073	3173472
7	WT -B27 _3	2C	2	WT -B27 _3	433.13	7389260	5824207	3130972	1803447	2232588	102344	215235	10070347	532579	962370	545932	264023	74111	1201340	88876	3198532	2519686	27215	996852	147871	188860621	2418744	341260	1151698	52417	4062503	187337	74700	1.01671e+07	5223272	221471	10914503	1226381	130951	242500	4218489	34074560	244746	22651574	903574	286576	2.6779e+07	48679	1701334
8	WT -B27 _4	2D	2	WT -B27 _4	216.31	6042970	5865418	2595589	1492629	2090001	149163	377454	18137765	546542	1996701	885781	562643	169094	1712477	236653	5655202	2324367	103694	410319	88815	256193799	4689710	794149	3749646	200414	8317686	524387	267189	2.53011e+07	10263589	655900	16362869	2573870	250091	338551	9603893	80846881	266430	21073218	1.91974e+06	379264	6.39148e+07	109126	1929934
9	WT -B27 _5	2E	2	WT -B27 _5	173.07	5541901	4295830	1729762	1043228	1396591	108027	219486	12462589	477827	2043291	883316	473731	154158	1131589	914945	3719736	2769631	128402	250191	77038	164769561	3431233	1045951	2709685	197426	7629577	405843	178160	2.31636e+07	5796927	432779	17697504	2506795	255754	309124	7493527	78573245	277810	19905265	902779	696296	4.81503e+07	290773	908288
10	WT _Starved_S_1	3A	3	WT _Starved_S_1	274.17	5841996	1706310	710589	526520	582401	53484	21653	4645411	293022	624582	442726	142441	47563	362599	120449	652987	1894395	6548	471066	94224	44971800	838892	132624	309968	25561	2952078	825922	31033	6.32594e+06	1055901	47176	5702020	474801	136618	140790	2158736	7796466	256734	11415193	278261	361743	8.67102e+06	58754	160000
11	WT _Starved_S_2	3B	3	WT _Starved_S_2	361.08	7667005	5537368	2849997	1709088	2374185	145668	134535	12769192	808659	1123946	700553	207540	146171	816557	49065	1751207	2451438	40405	1159000	165243	181091735	2467344	624938	1218739	48775	4815403	261632	71180	1.58739e+07	2232831	177060	16433741	809374	145817	358611	9412484	24575528	237340	23778934	779834	273119	1.47278e+07	69878	901130
12	WT _Starved_S_3	3B	3	WT _Starved_S_3	418.86	7302954	4951279	2456363	1527883	1811798	102558	68837	17085659	478488	1349448	739194	335799	203266	974327	120144	1489323	2223186	110884	943555	149498	103130012	2895800	534096	1368650	49839	5329636	338397	109452	1.67695e+07	4352863	279057	17727732	922661	221969	344070	11372821	30651916	338671	21080391	977196	218596	2.17501e+07	88381	382688
13	WT _Starved_S_4	3C	3	WT _Starved_S_4	72	4010469	3970963	1112716	746231	1105435	56350	163589	9446275	230919	1254915	636687	239477	125648	354580	122893	1727275	1526899	33210	71307	21010	156808414	1798623	665244	1031586	39543	4197010	221767	95206	1.915e+07	2209382	176420	11098316	502795	166834	163555	4614218	23206732	233148	9982562	561339	712050	9.85883e+06	67156	614536
14	WT _Refeed _RF_1	4A	4	WT _Refed _RF_1	100.89	3992643	4615872	1266475	862715	1219522	44042	49651	12104721	219553	2508815	637467	230152	348334	383955	489687	1834615	2047976	185529	65994	65224	44423363	11217563	455259	694466	22544	4296528	435884	59954	2.22181e+07	24275933	144286	16874131	513208	488902	149801	2498540	13343470	331931	12835778	578979	463315	4.48531e+07	99415	159517
15	WT _Refeed _RF_2	4B	4	WT _Refed _RF_2	375.28	8055856	5839008	3268370	1659340	2472006	165737	350954	27424677	1.41463e+06	4511049	668580	257394	298793	719013	949915	6628536	2350718	450416	1217672	185663	250732452	23739562	952924	1455384	31739	7429388	869534	98147	2.76979e+07	30521659	365954	32566300	901124	495481	392421	9990203	23315374	224752	34368720	1.29667e+06	109693	9.89318e+07	202535	2293286
16	WT _Refeed _RF_3	4B	4	WT _Refed _RF_3	0	2826221	4396782	990581	655624	945183	24507	35289	9687275	84293.1	1699243	536632	406457	298335	386339	1220385	1721735	1390415	198361	13276	18444	40133811	8299402	541764	1118458	30962	4056507	664091	34813	1.70965e+07	36843633	141454	17661359	660801	305962	84928	1364700	19391036	215995	5512304	497858	492765	3.33738e+07	80292	107121
17	WT _Refeed _RF_4	4C	4	WT _Refed _RF_4	43.1	3642013	5722691	1553028	987819	1589739	61948	179123	11921620	332983	3633847	570792	209621	191860	270953	744817	3455626	1448918	65836	60886	10162	186388664	10375263	598353	996340	42825	3707574	384067	78674	2.11542e+07	18297044	149055	19934918	493848	415417	142765	2595046	17594846	218639	11989476	825968	478330	4.014e+07	54115	870401
18	KO Basal_1	5A	5	KO Basal_1	389.89	7775311	5854587	3167113	1636463	2260483	149684	310065	72393734	1.55398e+06	8320037	984138	656730	399615	1869452	1952048	15040686	3352337	176703	1312318	209701	183552658	23488050	1758146	4577308	80991	8136937	295382	488787	6.45981e+07	11099320	1519910	47613977	3622045	543093	459876	10156408	74222366	277658	30224010	2.12282e+06	175189	1.63415e+08	1054147	1391868
19	KO Basal_2	5B	5	KO Basal_2	288.86	6271529	5330021	2559479	1359764	1825881	107448	162767	58653954	882341	5335339	702289	428811	407908	1247693	2790946	10888668	2754326	209649	539518	120340	126510827	15015526	1622839	4043427	55026	6269625	225860	275298	4.66045e+07	8353410	738520	43638937	2727377	390320	268922	6644140	55143673	262746	25305146	979791	208755	9.42225e+07	635839	763277
20	KO Basal_3	5B	5	KO Basal_3	447.82	7689709	5786123	3116515	1634500	2329562	151875	385597	70156826	1.44668e+06	5974602	731595	516829	287055	1733709	2174014	13440077	3397342	115005	1214245	165514	248466269	20934008	1275383	4176504	68559	8276953	324539	379620	4.8926e+07	11753258	1216517	49189417	2082544	415719	435954	11640654	65853142	304584	31053198	2.12251e+06	94168	1.53884e+08	721643	1718790
21	KO Basal_4	5C	5	KO Basal_4	57.79	4005846	5804371	1830838	1101764	1756207	70767	490284	54283380	631343	4539621	894201	580941	321149	868362	2019032	14477860	2286117	53545	92357	13083	160980052	12556592	1703527	3659369	49290	6587517	273940	306323	6.15682e+07	9915515	974222	34304897	2274736	493604	221554	4542545	79488601	300216	15796695	1.46654e+06	429730	1.14899e+08	520288	965036
22	KO_B27_1	6A	6	KO_B27_1	158.85	5500526	6043479	2360822	1338866	2056264	116242	327202	18503489	599963	2395814	1067358	716616	177584	1232297	432035	5082931	2488199	131650	214528	58346	234002025	5199899	1186482	3113900	126391	8084916	849804	245490	2.5802e+07	21007828	802672	17730883	3869856	291297	325818	7236184	98258778	295523	22348612	1.01292e+06	541404	6.18579e+07	229915	1541063
23	KO_B27_2	6B	6	KO_B27_2	14.29	2953294	3493425	746873	549162	761264	23207	80269	10381709	101199	940607	545823	911313	197904	909667	454342	2679468	1701247	36581	39573	14168	58763390	1752405	710009	2489973	70640	4131354	336478	118526	1.41311e+07	13649517	325904	11891749	3626161	189374	88611	2298102	55676500	233056	6400116	371899	771043	2.76507e+07	36875	161629
24	KO_B27_3	6B	6	KO_B27_3	462.11	8366499	5978257	3267487	1707518	2330509	196282	283133	30370420	1.23836e+06	1359880	806444	1049432	177109	3085403	380824	6739616	2718602	160504	1444712	204729	254194287	6683049	1153626	4270654	171866	9980177	1092586	298060	2.44091e+07	27703118	1178840	23207158	6249279	222172	484324	12455380	90856190	295265	33466408	1.46126e+06	108682	8.27015e+07	198911	1977650
25	KO_B27_4	6C	6	KO_B27_4	346.8	7996962	5850333	3371879	1754902	2355397	199236	321490	30088339	1.45571e+06	1668963	834221	802964	168154	3062030	831384	7916291	3344523	127682	1345260	214952	290121159	6275274	1030080	3996350	171432	9299815	913291	286303	2.3801e+07	20928903	976538	22310980	8037206	224727	439486	11959363	53992575	324360	29760740	946136	96971	7.20805e+07	200068	2929117
26	KO __Starved_S_1	7A	7	KO __Starved_S_1	28.89	3271335	3367521	816048	587353	825434	57241	93955	21866754	121393	858354	824429	334358	233394	432253	466396	2826221	1847465	145283	34457	25454	87856281	2689372	763288	2336665	64279	11707855	517115	136401	2.30049e+07	19203382	473083	15219358	975060	261066	146464	5121456	34397563	258073	10007282	773514	1476121	2.84511e+07	165280	344127
27	KO __Starved_S_2	7B	7	KO __Starved_S_2	317.83	8232447	5917981	3538919	1705730	2509693	255950	675805	49823338	1.38806e+06	1924926	1245240	307948	275721	1584220	151809	7590441	3290522	148808	1242367	211428	306406796	7246710	1172766	4036152	124937	10151039	741114	300923	3.5005e+07	13980217	1061209	29156592	2182532	260840	636224	21749547	42151155	313092	30903311	1.25276e+06	189938	4.88622e+07	293050	3963211
28	KO __Starved_S_3	7C	7	KO __Starved_S_3	115.17	4713178	5657357	2032308	1198606	1888150	115275	396217	33463815	481130	2108175	1185867	350415	235009	611075	356711	6778567	2099522	58883	145475	82272	259605695	5313073	1131589	3497047	82771	8270402	608230	226783	3.69034e+07	15356639	713949	21258822	1790848	219334	368596	12962660	55871324	255249	19651871	1.08475e+06	722572	4.24003e+07	240732	1879301
29	KO __Starved_S_4	7C	7	KO __Starved_S_4	202.03	5532796	5340812	2108368	1293814	1749166	85685	96553	41797575	347319	1745317	983425	415279	543650	1188258	460620	4194430	2231940	710858	231539	88002	86690687	5986155	1183622	3830340	102741	7775095	877933	248584	3.40225e+07	34944489	983534	25907966	2300670	278849	385289	13547482	37613109	293020	19702071	954920	640186	3.88816e+07	250274	447860
30	KO _Refeed _RF_1	8A	8	KO _Refed _RF_1	332.11	7594695	5695018	3040039	1418193	2304441	174529	208826	60085018	1.58424e+06	7245291	895795	352451	536179	933110	1940444	10380879	2494565	1061960	1155992	196646	160784111	33205384	900831	3264817	47564	9857504	1117370	241534	5.27201e+07	34083584	966393	46521426	1432025	774411	550613	17412896	32520298	261696	37826331	1.41513e+06	192361	1.57697e+08	258104	1139584
31	KO _Refeed _RF_2	8B	8	KO _Refed _RF_2	144.17	5048825	5759269	2184174	1220213	1968717	124683	251122	52072436	945592	7046667	1224141	501882	640624	735223	2293373	12689366	3353705	615950	165485	44026	117555318	29091283	1292489	3048260	45715	9809147	1306542	202016	7.25267e+07	34730656	793787	40236684	1397271	846545	369206	11553390	53365110	377785	30218544	1.55688e+06	382450	1.55302e+08	513989	830502
32	KO _Refeed _RF_3	8C	8	KO _Refed _RF_3	86.28	4438116	5616509	1903613	1200997	1880774	109359	265968	40520424	665481	4296011	1134566	520670	467966	669505	1997122	10600099	3637951	454417	102473	32222	136284538	22207040	1182188	2634530	27457	8851766	1087712	161917	5.94536e+07	31287964	678036	34338153	1277981	671793	264463	8905866	46510341	429087	25823654	1.28068e+06	515947	1.2186e+08	514544	815719
33	KO _Refeed _RF_4	8D	8	KO _Refed _RF_4	187.35	5539537	5249276	2026410	1220275	1719133	91291	129665	34452709	666614	5426867	828091	310053	421350	587396	1454229	5666940	2150433	208333	249057	80910	107261267	21632557	830733	1959907	37735	6685168	681573	92854	4.01526e+07	25986956	370001	30128501	977645	603861	295786	8022263	24387251	315648	27467910	899754	559825	9.37772e+07	224284	539530
[truncated: 34 more columns]
